# Supplementary material for: Enhancing e-learning through AI: advanced techniques for optimizing student performance
Source: PeerJ Comput Sci. 2024 Dec 23;10:e2576. doi: 10.7717/peerj-cs.2576 (PMC11784796; doi:10.7717/peerj-cs.2576)
Supplement: Supplemental Information 2 [file peerj-cs-10-2576-s002.xlsx]

## Sheet: Sheet1
Gender	Age	Institution Type	IT Student	Location	Financial Condition	Internet Type	Network Type	Class Duration	Self Lms	Device	Scholarship	Additional_Work	Sports_activity	Weekly_Study_Hours	Attendance	Reading	Notes	Listening_in_Class	Project_work	NationalITy	Topic	Semester	raisedhands	VisITedResources	AnnouncementsView	Discussion	ParentAnsweringSurvey	StudentAbsenceDays	Class	Grade	Adaptivity Level	HapSad	FocUnFoc	HeartRate	Temperature	Humidity	LightIntensity	NoiseLevel	CO2Level
Male	21	Non Government	No	Yes	Mid	Wifi	4G	2024-03-06	No	Tab	0.5	Yes	No	0	Always	Yes	Yes	No	No	OM	Physics	F	15	16	2	20	Yes	Under-7	M	AA	Moderate	Yes	Yes	72	22.4945	55.9303	688.876	68.7414	811.317
Female	22	Non Government	No	Yes	Mid	Mobile Data	4G	2024-01-03	Yes	Mobile	0.5	Yes	No	0	Always	Yes	No	Yes	Yes	OM	Physics	F	20	20	3	25	Yes	Under-7	M	AA	Moderate	Yes	Yes	72	29.4086	36.8955	172.029	54.1451	680.543
Female	18	Government	No	Yes	Mid	Wifi	4G	2024-01-03	No	Mobile	0.5	No	No	2	Never	No	No	No	Yes	OM	Statistics	F	10	7	0	30	No	Above-7	L	AA	Moderate	Yes	Yes	67	26.7839	64.8958	318.097	58.3145	433.424
Female	22	Non Government	No	Yes	Mid	Mobile Data	4G	2024-01-03	No	Mobile	0.5	Yes	No	2	Always	No	Yes	No	No	OM	Neuroscience	F	30	25	5	35	No	Above-7	L	AA	Moderate	Yes	Yes	80	25.1839	54.5246	796.311	73.0035	951.106
Female	18	Non Government	No	Yes	Poor	Mobile Data	3G	0	No	Mobile	0.5	No	No	12	Always	Yes	No	Yes	Yes	UAE	Astronomy	F	40	50	12	50	No	Above-7	M	AA	Low	Yes	Yes	71	19.8722	36.2882	575.817	82.5784	988.197
Male	18	Non Government	No	Yes	Poor	Mobile Data	3G	2024-01-03	No	Mobile	0.5	No	No	2	Always	Yes	No	Yes	Yes	LEB	Engineering	F	42	30	13	70	Yes	Above-7	M	BA	Low	Yes	Yes	68	19.8719	68.4935	935.172	46.3331	658.626
Male	23	Non Government	No	Yes	Mid	Wifi	4G	0	No	Mobile	0.75	No	No	0	Always	No	Yes	Yes	Yes	SA	Statistics	F	35	12	0	17	No	Above-7	L	CC	Low	Yes	Yes	78	18.697	50.7346	485.876	50.5246	768.196
Male	18	Non Government	No	Yes	Mid	Wifi	4G	2024-01-03	No	Mobile	0.5	Yes	Yes	2	Sometimes	No	Yes	Yes	Yes	OM	Materials Science	F	50	10	15	22	Yes	Under-7	M	BA	Moderate	Yes	Yes	74	28.3941	32.9159	882.831	85.8444	670.179
Male	21	Government	No	Yes	Mid	Wifi	4G	2024-01-03	No	Mobile	0.5	No	Yes	0	Always	No	No	No	Yes	UAE	Materials Science	F	12	21	16	50	Yes	Under-7	M	CC	Low	Yes	Yes	69	25.2134	55.0733	504.06	64.7107	593.128
Male	21	Non Government	No	Yes	Mid	Mobile Data	3G	2024-01-03	No	Mobile	0.5	No	No	12	Never	No	Yes	No	No	KW	Biology	F	70	80	25	70	Yes	Under-7	M	Fail	Moderate	No	No	60	26.4969	40.128	981.323	40.7377	446.391
Female	20	Government	No	Yes	Mid	Wifi	4G	2024-01-03	No	Mobile	0.5	No	No	12	Sometimes	No	No	No	Yes	OM	Engineering	F	50	88	30	80	Yes	Under-7	H	BA	Low	Yes	Yes	56	18.247	62.1477	963.851	69.8217	673.641
Female	24	Non Government	No	Yes	Mid	Wifi	4G	2024-01-03	No	Mobile	0.75	Yes	Yes	8	Sometimes	No	Yes	No	Yes	KW	Physics	F	19	6	19	12	Yes	Under-7	M	Fail	Low	No	No	60	29.6389	62.7129	396.223	89.4457	891.031
Male	19	Non Government	Yes	Yes	Mid	Mobile Data	3G	2024-01-03	No	Mobile	0.75	No	No	0	Always	Yes	No	No	No	LEB	Environmental Science	F	5	1	0	11	No	Above-7	L	Fail	Moderate	No	No	72	27.9893	69.1579	897.331	79.4072	410.219
Female	24	Non Government	No	No	Mid	Wifi	4G	2024-01-03	No	Mobile	1	No	No	0	Always	Yes	No	No	Yes	OM	Materials Science	F	20	14	12	19	No	Above-7	L	AA	Low	Yes	Yes	55	20.5481	50.0748	862.85	74.7445	749.265
Female	19	Non Government	No	Yes	Poor	Mobile Data	3G	2024-01-03	No	Mobile	0.75	Yes	Yes	12	Never	No	No	Yes	Yes	LEB	Engineering	F	62	70	44	60	No	Above-7	H	BA	Moderate	Yes	Yes	78	20.1819	48.1983	289.612	42.4828	928.463
Male	20	Non Government	No	Yes	Poor	Wifi	4G	2024-01-03	No	Mobile	0.5	No	No	0	Always	No	Yes	No	Yes	UAE	Materials Science	F	30	40	22	66	Yes	Under-7	M	BA	Low	Yes	Yes	64	20.2009	60.139	661.861	82.5684	530.53
Female	19	Government	Yes	Yes	Poor	Mobile Data	4G	0	No	Computer	1	No	Yes	0	Always	Yes	No	No	No	UAE	Astronomy	F	36	30	20	80	No	Above-7	M	AA	Low	Yes	Yes	54	21.6509	35.2988	165.414	61.5473	509.954
Female	20	Government	No	No	Mid	Wifi	4G	2024-01-03	No	Mobile	0.5	No	No	0	Always	Yes	No	No	Yes	SA	English	F	55	13	35	90	No	Above-7	M	BA	Low	Yes	Yes	72	24.2971	51.8766	853.04	83.3574	863.366
Female	23	Non Government	No	Yes	Mid	Wifi	4G	2024-01-03	No	Mobile	0.75	No	No	12	Always	Yes	No	No	No	SA	Engineering	F	69	15	36	96	Yes	Under-7	M	BA	Low	Yes	Yes	72	23.1833	51.8499	257.091	49.7897	553.052
Female	24	Non Government	No	Yes	Mid	Wifi	4G	2024-03-06	No	Mobile	0.5	No	No	2	Sometimes	No	No	Yes	No	JO	Materials Science	F	70	50	40	99	Yes	Under-7	H	BB	Moderate	Yes	Yes	68	21.4947	33.5789	163.733	33.7231	515.191
Female	23	Non Government	No	Yes	Rich	Wifi	4G	2024-01-03	No	Mobile	1	Yes	No	0	Never	No	No	Yes	No	LEB	Environmental Science	F	60	60	33	90	No	Above-7	M	AA	High	Yes	Yes	63	25.3422	46.7194	460.197	58.5586	626.794
Male	20	Government	No	Yes	Mid	Mobile Data	4G	0	No	Mobile	1	No	No	0	Never	No	No	No	No	SA	Materials Science	F	10	12	4	80	No	Under-7	M	AA	Low	Yes	Yes	95	19.6739	64.1314	619.23	46.1903	635.501
Female	19	Non Government	No	No	Mid	Mobile Data	3G	2024-03-06	Yes	Mobile	0.5	Yes	No	0	Always	Yes	Yes	Yes	No	OM	Astronomy	F	15	21	2	90	No	Under-7	M	BB	Low	Yes	Yes	71	21.5057	64.2461	869.425	72.9138	924.461
Female	24	Non Government	No	Yes	Mid	Mobile Data	3G	2024-01-03	No	Mobile	0.25	Yes	Yes	12	Always	Yes	Yes	No	No	LEB	Geology	F	2	0	2	50	No	Above-7	L	AA	Moderate	Yes	Yes	74	22.3963	33.9695	976.818	87.4264	771.066
Male	20	Government	No	Yes	Mid	Wifi	4G	2024-03-06	No	Mobile	0.5	No	No	2	Always	Yes	No	Yes	No	JO	Mathematics	F	0	2	3	70	Yes	Above-7	L	BA	Moderate	Yes	Yes	92	23.4728	33.6288	495.543	71.4584	643.577
Male	24	Non Government	No	Yes	Mid	Mobile Data	4G	2024-01-03	No	Mobile	0.5	No	No	0	Always	No	Yes	No	No	JO	Engineering	F	8	7	30	40	Yes	Above-7	L	BB	Moderate	Yes	Yes	80	27.4221	40.5078	154.402	83.216	720.633
Female	18	Non Government	No	Yes	Mid	Mobile Data	4G	2024-01-03	No	Mobile	0.5	No	Yes	0	Always	Yes	Yes	No	No	KW	Statistics	F	19	19	25	40	Yes	Under-7	M	AA	Moderate	Yes	Yes	75	20.3961	64.9906	774.204	57.1814	972.379
Male	23	Non Government	Yes	Yes	Mid	Wifi	4G	2024-03-06	No	Computer	0.5	Yes	No	0	Always	Yes	Yes	Yes	No	OM	Mathematics	F	25	15	12	33	No	Above-7	L	AA	Moderate	Yes	Yes	55	24.1708	35.1561	608.656	76.2984	467.929
Female	18	Non Government	No	Yes	Mid	Mobile Data	4G	2024-01-03	No	Mobile	0.5	No	No	0	Never	No	No	No	No	JO	English	F	75	85	52	43	Yes	Under-7	M	BB	Moderate	Yes	Yes	64	25.109	58.7999	503.102	80.5826	524.629
Female	24	Non Government	No	Yes	Mid	Wifi	4G	2024-03-06	No	Mobile	0.75	No	No	0	Never	No	No	Yes	Yes	SA	Neuroscience	F	30	90	33	35	No	Under-7	M	CC	Moderate	Yes	Yes	74	18.5574	34.0466	378.342	72.6525	977.517
Female	20	Non Government	No	Yes	Mid	Mobile Data	3G	2024-01-03	No	Mobile	1	Yes	Yes	0	Always	No	Yes	Yes	No	SA	Materials Science	F	35	80	50	70	Yes	Under-7	H	CC	Moderate	Yes	Yes	58	25.2905	54.9255	552.159	60.4666	974.395
Female	19	Non Government	No	No	Mid	Mobile Data	4G	2024-01-03	No	Mobile	0.5	Yes	No	0	Always	No	Yes	No	No	SA	Computer Science	F	4	5	40	16	Yes	Above-7	L	BB	Low	Yes	Yes	64	20.0463	44.2427	404.812	67.552	506.299
Male	19	Non Government	Yes	Yes	Mid	Mobile Data	4G	2024-01-03	No	Mobile	0.5	No	No	2	Always	Yes	No	No	Yes	JO	Statistics	F	2	19	10	50	Yes	Above-7	L	AA	Moderate	Yes	Yes	55	18.7806	61.5566	781.311	72.0304	487.065
Female	21	Non Government	No	Yes	Mid	Wifi	4G	2024-01-03	No	Mobile	0.5	Yes	No	0	Always	Yes	Yes	No	No	OM	English	F	8	22	9	40	No	Above-7	L	BA	Moderate	Yes	Yes	79	29.3866	39.3476	589.504	45.1851	652.651
Male	21	Non Government	No	Yes	Poor	Mobile Data	3G	2024-01-03	No	Mobile	0.5	No	No	2	Always	Yes	No	Yes	No	JO	Engineering	F	12	11	8	40	No	Above-7	L	BA	Low	Yes	Yes	82	29.5876	55.5681	889.163	78.5748	429.831
Female	18	Non Government	Yes	Yes	Mid	Wifi	3G	2024-03-06	Yes	Mobile	0.75	No	No	12	Always	Yes	Yes	No	No	LEB	English	F	10	12	17	30	No	Above-7	L	AA	Moderate	Yes	Yes	66	27.7008	39.4273	589.19	87.0195	792.942
Female	24	Government	Yes	Yes	Mid	Mobile Data	4G	2024-01-03	No	Mobile	0.75	Yes	No	12	Always	Yes	Yes	Yes	Yes	LEB	Engineering	F	8	6	4	22	Yes	Above-7	L	BA	Moderate	Yes	Yes	53	21.6554	58.5464	314.436	57.9144	446.498
Female	24	Non Government	No	Yes	Poor	Mobile Data	3G	2024-01-03	No	Mobile	0.5	Yes	Yes	2	Sometimes	No	No	Yes	Yes	LEB	Geology	F	45	54	26	90	Yes	Under-7	M	AA	High	Yes	Yes	63	19.1721	64.9471	865.983	72.064	434.818
Female	24	Government	No	No	Poor	Mobile Data	4G	2024-01-03	No	Mobile	1	No	No	0	Always	Yes	No	Yes	Yes	KW	English	F	0	0	0	4	No	Above-7	L	BA	Low	Yes	Yes	53	26.2108	35.0721	601.497	74.2216	691.112
Female	22	Government	No	Yes	Mid	Wifi	3G	2024-01-03	No	Mobile	0.5	No	No	0	Always	No	Yes	Yes	Yes	KW	Computer Science	F	50	90	37	70	Yes	Under-7	M	AA	Low	Yes	Yes	70	23.2818	64.6638	286.157	69.7349	974.672
Male	22	Non Government	No	Yes	Mid	Wifi	4G	2024-03-06	Yes	Computer	0.5	No	No	2	Always	Yes	No	Yes	Yes	OM	Engineering	F	14	13	3	70	No	Above-7	L	AA	Moderate	Yes	Yes	65	19.4645	53.743	661.157	62.8269	656.078
Female	24	Non Government	Yes	Yes	Mid	Wifi	4G	2024-01-03	Yes	Mobile	0.5	Yes	No	2	Always	No	Yes	No	Yes	KW	Chemistry	F	19	20	16	50	No	Under-7	M	AA	Moderate	Yes	Yes	75	23.9421	35.0844	421.945	82.8989	613.889
Female	21	Non Government	No	Yes	Poor	Mobile Data	3G	0	No	Mobile	0.5	No	Yes	0	Never	No	Yes	No	Yes	SA	Astronomy	F	10	12	7	33	Yes	Above-7	L	AA	Low	Yes	Yes	59	18.4127	47.1017	859.965	56.9356	998.774
Male	19	Non Government	No	Yes	Mid	Mobile Data	4G	2024-01-03	No	Mobile	0.5	No	No	0	Always	Yes	No	Yes	No	OM	Materials Science	F	30	35	28	90	Yes	Under-7	M	CB	Moderate	Yes	Yes	65	28.9118	36.4344	507.97	33.6662	719.181
Male	23	Non Government	Yes	Yes	Mid	Wifi	3G	2024-03-06	Yes	Computer	0.5	No	No	0	Always	Yes	Yes	Yes	Yes	KW	Statistics	F	33	33	30	90	No	Under-7	M	AA	Low	Yes	Yes	50	21.1054	58.0139	753.797	80.6734	625.145
Male	20	Non Government	Yes	Yes	Mid	Wifi	4G	2024-01-03	No	Computer	0.5	No	No	8	Always	Yes	No	Yes	No	OM	Chemistry	F	20	12	15	70	No	Above-7	L	BB	Moderate	Yes	Yes	83	25.9503	60.3547	185.983	70.4389	631.516
Female	24	Non Government	No	Yes	Poor	Mobile Data	4G	2024-01-03	No	Mobile	0.5	No	No	0	Always	Yes	Yes	No	No	OM	Geology	F	7	10	1	30	No	Above-7	L	CC	Moderate	Yes	Yes	67	21.7405	34.2319	456.422	80.9555	516.976
Female	19	Non Government	No	Yes	Mid	Mobile Data	3G	2024-01-03	No	Mobile	0.5	No	No	0	Always	No	Yes	Yes	Yes	LEB	Environmental Science	F	70	4	39	90	Yes	Under-7	H	BB	Moderate	Yes	Yes	63	24.2408	50.2456	984.917	38.3128	707.334
Male	20	Non Government	No	Yes	Mid	Mobile Data	4G	2024-01-03	No	Mobile	0.5	No	Yes	0	Always	No	No	Yes	No	SA	Neuroscience	F	13	80	40	88	Yes	Under-7	H	AA	Moderate	Yes	Yes	58	24.5605	62.585	827.614	31.8452	663.313
Male	24	Non Government	Yes	Yes	Mid	Wifi	3G	2024-03-06	Yes	Computer	0.75	No	No	2	Never	Yes	No	Yes	Yes	UAE	Geology	F	29	39	50	77	Yes	Under-7	M	BA	Low	Yes	Yes	68	20.2183	67.4465	243.947	86.0625	562.477
Male	21	Government	No	Yes	Mid	Wifi	4G	2024-01-03	No	Mobile	0.5	No	No	2	Sometimes	Yes	Yes	Yes	Yes	SA	Engineering	F	20	14	12	70	No	Above-7	L	AA	Low	Yes	Yes	63	29.635	50.5407	349.988	38.8637	496.324
Female	20	Non Government	No	Yes	Mid	Mobile Data	4G	2024-01-03	No	Mobile	0.5	Yes	Yes	0	Always	Yes	Yes	No	No	LEB	Materials Science	F	39	15	16	50	No	Above-7	L	CB	Moderate	Yes	Yes	72	27.3016	68.0112	396.834	78.5791	586.743
Male	20	Non Government	Yes	Yes	Mid	Mobile Data	3G	2024-03-06	Yes	Mobile	0.5	Yes	No	2	Always	Yes	Yes	Yes	No	OM	Geology	F	55	90	16	40	No	Under-7	M	AA	Moderate	Yes	Yes	53	29.274	51.4276	685.329	79.3926	705.21
Male	22	Government	Yes	No	Poor	Mobile Data	4G	2024-01-03	No	Mobile	0.5	No	Yes	2	Always	Yes	Yes	Yes	No	KW	Engineering	F	49	70	19	75	Yes	Under-7	H	CC	Moderate	Yes	Yes	63	28.7379	45.7676	781.295	72.5223	435
Male	22	Non Government	No	Yes	Poor	Mobile Data	4G	2024-01-03	No	Mobile	0.5	No	No	12	Never	No	Yes	No	Yes	UAE	Biology	F	12	50	8	30	No	Above-7	L	BB	Low	Yes	Yes	70	25.1748	63.9281	774.574	37.8757	492.246
Female	18	Non Government	No	Yes	Mid	Mobile Data	4G	2024-01-03	No	Mobile	0.5	Yes	No	8	Always	No	Yes	Yes	No	SA	English	F	16	14	6	20	Yes	Above-7	L	BB	Moderate	Yes	Yes	74	29.0625	49.7193	558.887	70.0439	968.594
Male	20	Government	No	Yes	Mid	Mobile Data	4G	0	No	Mobile	0.5	No	Yes	0	Always	Yes	Yes	Yes	No	JO	Environmental Science	F	19	5	4	1	Yes	Above-7	L	CC	Low	Yes	Yes	65	19.0619	48.8761	829.738	83.3452	725.713
Female	24	Non Government	Yes	Yes	Mid	Mobile Data	3G	2024-01-03	No	Mobile	0.5	Yes	Yes	0	Always	Yes	Yes	No	No	LEB	Statistics	F	5	2	6	5	Yes	Above-7	L	CB	Low	Yes	Yes	80	20.3518	49.6125	493.37	55.5319	438.07
Female	21	Non Government	No	No	Mid	Mobile Data	3G	0	No	Mobile	0.5	No	No	12	Always	Yes	Yes	Yes	No	JO	Materials Science	F	28	60	19	50	Yes	Under-7	M	BB	Low	Yes	Yes	67	18.5427	63.8714	211.493	54.811	815.853
Male	20	Government	No	No	Poor	Mobile Data	3G	0	No	Mobile	0.5	No	Yes	0	Always	Yes	Yes	No	No	OM	English	F	27	22	22	40	No	Under-7	M	CC	Low	Yes	Yes	63	21.904	63.2777	607.998	56.5715	437.082
Male	21	Non Government	No	Yes	Mid	Wifi	4G	2024-03-06	No	Mobile	0.5	No	No	12	Sometimes	Yes	6	Yes	No	LEB	Mathematics	F	21	10	28	20	No	Above-7	L	BA	Moderate	Yes	Yes	67	22.6641	46.1408	957.071	34.9363	843.325
Male	21	Government	No	No	Mid	Mobile Data	4G	0	No	Mobile	0.5	No	Yes	2	Always	No	Yes	Yes	No	OM	Engineering	F	50	70	32	40	Yes	Under-7	M	CC	Low	Yes	Yes	62	21.2562	43.332	813.694	83.5215	849.978
Female	24	Non Government	No	Yes	Mid	Mobile Data	3G	2024-01-03	Yes	Mobile	0.5	No	No	0	Never	No	No	Yes	Yes	KW	Geology	F	80	90	70	80	Yes	Under-7	H	BB	Moderate	Yes	Yes	68	27.9449	49.6771	620.831	82.151	790.647
Male	24	Non Government	Yes	Yes	Mid	Mobile Data	4G	2024-01-03	No	Mobile	0.75	No	No	2	Always	Yes	Yes	Yes	No	JO	Astronomy	F	17	13	16	12	Yes	Under-7	M	CC	Moderate	Yes	Yes	67	22.281	52.9109	682.125	89.8746	839.323
Male	22	Non Government	No	Yes	Poor	Wifi	4G	2024-01-03	No	Mobile	1	No	No	0	Always	Yes	No	No	Yes	KW	Engineering	F	0	5	7	2	No	Above-7	L	BB	Low	Yes	Yes	97	21.3712	39.5335	937.506	65.111	452.779
Male	18	Government	No	No	Mid	Mobile Data	4G	2024-01-03	No	Mobile	0.5	No	No	12	Always	Yes	No	No	No	LEB	Computer Science	F	13	5	18	19	No	Above-7	L	BA	High	Yes	Yes	63	24.5124	61.7582	485.509	75.0715	836.068
Male	23	Non Government	No	Yes	Mid	Mobile Data	3G	2024-01-03	No	Mobile	0.5	No	No	0	Always	Yes	No	No	No	SA	Mathematics	F	25	10	19	30	No	Above-7	M	CC	Moderate	Yes	Yes	65	19.6911	49.4593	398.255	42.1603	482.013
Female	23	Government	No	No	Mid	Mobile Data	3G	0	No	Mobile	0.5	Yes	Yes	12	Always	No	No	No	No	OM	Astronomy	F	65	75	23	80	Yes	Under-7	H	AA	Low	Yes	Yes	82	27.6264	43.3618	979.517	70.0517	603.704
Female	18	Government	No	Yes	Mid	Wifi	4G	2024-01-03	No	Mobile	0.75	Yes	No	0	Always	Yes	No	Yes	No	OM	Environmental Science	F	70	69	35	30	Yes	Under-7	H	CC	Low	Yes	Yes	79	18.8946	34.2728	877.099	68.984	965.647
Male	24	Non Government	Yes	Yes	Mid	Mobile Data	4G	2024-01-03	No	Mobile	0.75	No	No	0	Always	Yes	No	No	Yes	JO	Geology	F	39	40	11	33	No	Under-7	M	CC	Moderate	Yes	Yes	92	29.8426	39.5538	390.739	84.0725	701.725
Male	23	Government	No	No	Poor	Mobile Data	3G	2024-01-03	Yes	Mobile	0.75	No	Yes	0	Always	Yes	Yes	Yes	Yes	SA	Statistics	F	22	30	10	12	Yes	Above-7	L	DD	Low	Yes	Yes	70	27.2669	67.9712	517.403	79.8476	980.456
Female	19	Government	No	No	Mid	Mobile Data	4G	0	No	Mobile	0.75	No	No	0	Always	No	Yes	Yes	No	JO	Engineering	F	29	22	9	20	Yes	Under-7	M	DC	Low	Yes	Yes	64	20.3846	42.204	473.57	86.308	453.353
Male	22	Government	No	Yes	Mid	Mobile Data	4G	0	No	Mobile	0.5	No	Yes	0	Always	No	Yes	Yes	Yes	LEB	Geology	F	11	2	2	8	No	Under-7	L	DC	Low	Yes	Yes	75	18.0663	36.7544	234.186	82.13	686.534
Female	24	Non Government	No	Yes	Poor	Mobile Data	3G	2024-01-03	No	Mobile	0.75	No	No	0	Always	No	Yes	Yes	No	KW	Astronomy	F	19	30	26	19	Yes	Above-7	M	DC	Low	Yes	Yes	85	27.7855	48.4269	962.037	82.1216	437.441
Male	24	Non Government	Yes	Yes	Mid	Mobile Data	4G	2024-01-03	No	Mobile	0.75	No	No	0	Always	Yes	No	No	No	KW	Astronomy	F	12	0	6	13	No	Under-7	L	DD	Moderate	Yes	Yes	65	26.4823	42.2835	463.881	33.8234	778.126
Female	23	Non Government	No	Yes	Mid	Mobile Data	2G	2024-01-03	No	Mobile	0.75	No	Yes	0	Always	No	Yes	No	No	LEB	Engineering	F	50	90	29	60	Yes	Under-7	M	DD	Low	Yes	Yes	74	26.7481	31.4064	887.796	80.7577	447.224
Female	19	Non Government	No	Yes	Mid	Mobile Data	3G	2024-01-03	Yes	Mobile	0.25	No	Yes	2	Always	Yes	Yes	No	No	KW	Computer Science	F	15	70	37	44	Yes	Under-7	M	CB	Moderate	Yes	Yes	72	27.2552	42.9258	270.421	66.4487	505.221
Female	22	Government	No	No	Mid	Mobile Data	4G	0	No	Mobile	0.25	No	No	2	Sometimes	No	6	No	Yes	SA	Geology	F	20	80	33	33	Yes	Under-7	M	DD	Low	Yes	Yes	70	18.8885	51.7643	593.084	52.8267	555.298
Female	24	Non Government	No	Yes	Mid	Mobile Data	4G	2024-03-06	No	Mobile	0.75	Yes	Yes	0	Always	Yes	Yes	Yes	No	JO	English	F	13	3	11	9	No	Above-7	L	CB	Moderate	Yes	Yes	81	22.3016	52.0685	121.565	33.3909	849.246
Male	20	Non Government	No	Yes	Mid	Mobile Data	4G	2024-01-03	No	Mobile	0.75	No	No	0	Always	Yes	Yes	Yes	No	SA	Mathematics	F	80	90	49	55	Yes	Under-7	H	BB	Moderate	Yes	Yes	72	19.3904	44.2624	787.798	70.6604	498.377
Male	18	Non Government	No	Yes	Poor	Mobile Data	3G	2024-01-03	No	Mobile	0.5	Yes	No	0	Sometimes	Yes	Yes	Yes	Yes	KW	Statistics	F	8	15	10	40	Yes	Under-7	L	CB	Low	Yes	Yes	57	28.3572	47.8921	622.823	49.6921	907.979
Female	23	Non Government	No	Yes	Mid	Mobile Data	4G	2024-03-06	No	Mobile	0.5	Yes	No	0	Always	No	Yes	No	No	UAE	Environmental Science	F	8	25	1	70	No	Above-7	L	BB	Moderate	Yes	Yes	65	25.4796	68.6207	663.031	58.0666	479.142
Male	20	Non Government	Yes	Yes	Mid	Wifi	4G	2024-01-03	No	Computer	0.75	Yes	No	2	Always	Yes	No	Yes	No	JO	Engineering	F	7	5	2	80	Yes	Above-7	L	DD	Moderate	Yes	Yes	72	21.9708	45.0939	146.549	70.9037	421.147
Female	20	Government	No	No	Mid	Mobile Data	3G	0	No	Mobile	0.5	No	No	12	Always	Yes	Yes	No	Yes	KW	English	F	7	4	10	50	No	Above-7	M	DD	Low	Yes	Yes	80	18.7627	40.3291	289.934	84.7065	637.027
Female	23	Non Government	No	Yes	Poor	Mobile Data	4G	2024-01-03	No	Mobile	0.5	Yes	No	12	Always	No	Yes	No	No	LEB	Mathematics	F	50	70	50	10	Yes	Above-7	H	DD	Moderate	Yes	Yes	88	21.7318	39.7387	166.898	79.5262	987.665
Male	22	Non Government	No	Yes	Mid	Mobile Data	3G	2024-01-03	No	Mobile	1	No	No	2	Always	Yes	Yes	Yes	No	LEB	Biology	F	1	0	1	12	No	Above-7	L	CB	Moderate	Yes	Yes	54	21.9022	48.3106	360.023	57.0358	466.205
Male	21	Non Government	No	Yes	Mid	Mobile Data	4G	2024-01-03	No	Mobile	0.75	No	No	0	Never	No	No	Yes	Yes	UAE	Mathematics	F	70	12	40	50	Yes	Under-7	H	CC	High	Yes	Yes	67	26.7553	60.3808	664.695	53.267	461.031
Female	22	Non Government	Yes	Yes	Mid	Wifi	4G	2024-01-03	Yes	Mobile	0.5	No	Yes	2	Always	Yes	No	No	Yes	JO	Biology	F	19	70	3	50	No	Under-7	L	DC	Moderate	Yes	Yes	68	25.6507	38.2395	609.567	44.3868	850.7
Male	22	Non Government	No	Yes	Mid	Wifi	4G	2024-01-03	No	Mobile	0.75	No	Yes	0	Always	Yes	Yes	No	Yes	KW	Chemistry	F	3	12	4	33	No	Under-7	L	DC	Moderate	Yes	Yes	55	28.6466	58.3718	650.935	52.3456	587.297
Male	19	Government	No	No	Poor	Mobile Data	4G	0	No	Mobile	0.5	No	No	0	Always	Yes	No	No	No	LEB	Computer Science	F	5	20	1	50	Yes	Above-7	L	DC	Low	Yes	Yes	67	23.6666	30.846	594.326	36.6628	830.369
Male	23	Non Government	No	No	Mid	Mobile Data	4G	2024-01-03	No	Mobile	0.5	No	Yes	0	Sometimes	No	No	Yes	Yes	JO	Neuroscience	F	4	8	10	60	Yes	Above-7	L	DC	Moderate	Yes	Yes	106	19.4351	46.7573	345.726	88.2663	520.006
Male	23	Non Government	Yes	Yes	Mid	Wifi	4G	2024-03-06	Yes	Computer	1	Yes	Yes	0	Always	No	Yes	Yes	No	UAE	Chemistry	F	80	90	55	19	Yes	Under-7	H	DC	Moderate	Yes	Yes	81	26.5589	61.0346	320.057	64.435	676.043
Male	23	Non Government	Yes	Yes	Mid	Wifi	3G	2024-03-06	Yes	Computer	0.5	No	No	0	Always	Yes	No	No	No	UAE	Mathematics	F	50	70	19	15	Yes	Under-7	H	DD	Moderate	Yes	Yes	80	27.1294	43.5493	223.354	37.6684	559.174
Male	22	Non Government	Yes	Yes	Poor	Mobile Data	3G	2024-01-03	Yes	Mobile	None	Yes	No	0	Always	No	Yes	No	No	SA	Engineering	F	55	89	40	40	Yes	Under-7	H	CB	Low	Yes	Yes	80	24.7353	52.5495	864.164	51.1684	670.917
Female	19	Non Government	No	Yes	Poor	Mobile Data	4G	2024-01-03	No	Mobile	0.5	No	No	0	Always	Yes	No	No	No	JO	Neuroscience	F	80	44	35	10	No	Above-7	L	DC	Moderate	Yes	Yes	48	27.2516	38.1992	654.831	62.8223	861.458
Female	20	Non Government	Yes	Yes	Mid	Wifi	4G	2024-01-03	No	Computer	1	Yes	Yes	0	Sometimes	No	No	No	Yes	JO	Statistics	F	100	80	2	70	No	Under-7	H	CC	Moderate	Yes	Yes	67	23.9255	59.6798	267.86	61.9731	857.206
Male	18	Non Government	No	Yes	Mid	Mobile Data	4G	2024-01-03	No	Mobile	0.75	No	Yes	0	Sometimes	No	No	No	No	KW	Chemistry	F	14	60	11	75	Yes	Under-7	H	DD	Moderate	Yes	Yes	60	24.2728	32.0912	259.488	32.1302	709.463
Female	20	Government	No	No	Poor	Mobile Data	2G	2024-01-03	No	Mobile	0.75	Yes	No	0	Always	No	No	Yes	No	JO	Physics	F	6	2	38	12	No	Under-7	M	DC	Low	Yes	Yes	68	23.1305	64.1017	885.732	87.0505	957.023
Male	18	Non Government	Yes	Yes	Mid	Wifi	4G	2024-01-03	Yes	Mobile	0.75	No	Yes	0	Never	No	No	No	Yes	LEB	Biology	F	10	3	0	30	No	Under-7	M	DD	Moderate	Yes	Yes	73	18.305	37.9279	768.458	46.5225	558.27
Male	20	Government	No	Yes	Mid	Wifi	4G	2024-01-03	No	Mobile	0.5	No	No	0	Never	No	No	No	Yes	UAE	Environmental Science	F	50	7	9	50	Yes	Above-7	M	DD	Low	Yes	Yes	63	19.2947	64.9759	693.459	30.9711	544.187
Male	20	Non Government	No	Yes	Mid	Wifi	4G	0	No	Mobile	0.75	No	No	0	Sometimes	No	Yes	Yes	Yes	SA	Astronomy	F	50	90	40	90	Yes	Under-7	M	DC	Low	Yes	Yes	59	18.3772	44.1012	466.178	34.5866	768.284
Female	22	Non Government	No	Yes	Mid	Wifi	4G	2024-01-03	No	Computer	0.75	No	No	2	Always	No	No	Yes	Yes	KW	Computer Science	F	70	92	50	7	Yes	Under-7	H	DD	Moderate	Yes	Yes	75	25.6369	58.9073	335.778	64.8117	772.778
Female	23	Non Government	No	No	Mid	Mobile Data	3G	0	No	Mobile	0.5	No	No	0	Always	No	No	Yes	Yes	LEB	Astronomy	F	2	6	2	8	No	Above-7	L	DD	Low	Yes	Yes	64	21.7723	42.769	981.506	38.2671	427.924
Male	21	Non Government	Yes	Yes	Mid	Mobile Data	4G	2024-01-03	No	Mobile	0.75	No	No	12	Always	No	Yes	Yes	No	SA	Computer Science	F	1	7	6	10	No	Above-7	L	DD	Moderate	Yes	Yes	61	24.1028	66.2365	817.516	32.5035	764.667
Female	24	Non Government	No	Yes	Poor	Wifi	4G	2024-01-03	No	Mobile	0.5	No	No	0	Sometimes	No	Yes	No	Yes	UAE	Computer Science	F	0	12	3	3	Yes	Above-7	M	BB	Moderate	Yes	Yes	68	28.8908	35.0655	371.601	52.7776	624.662
Male	24	Government	No	Yes	Mid	Wifi	4G	2024-01-03	No	Computer	0.75	Yes	Yes	0	Always	Yes	No	No	No	KW	Mathematics	F	0	0	5	80	Yes	Above-7	L	DD	Moderate	Yes	Yes	65	20.9915	37.1408	862.808	67.3657	848.466
Female	18	Non Government	No	Yes	Mid	Mobile Data	3G	2024-01-03	No	Mobile	0.75	No	Yes	0	Always	No	No	No	Yes	KW	Engineering	F	12	26	7	40	Yes	Under-7	M	DD	Moderate	Yes	Yes	78	22.9246	49.7212	783.039	36.7104	884.863
Female	20	Non Government	No	Yes	Mid	Wifi	4G	2024-01-03	No	Computer	0.75	Yes	Yes	0	Always	No	Yes	Yes	No	UAE	Statistics	F	70	90	41	33	Yes	Under-7	H	DC	Moderate	Yes	Yes	43	27.0666	33.2775	367.372	48.7997	731.292
Male	23	Non Government	No	Yes	Mid	Wifi	4G	2024-03-06	No	Tab	1	No	Yes	2	Sometimes	Yes	Yes	No	Yes	JO	Astronomy	F	7	12	5	3	No	Above-7	M	DC	Moderate	Yes	Yes	80	20.7456	37.8392	483.898	55.0656	401.023
Female	18	Non Government	No	Yes	Mid	Wifi	3G	2024-01-03	Yes	Mobile	0.5	No	Yes	0	Sometimes	No	Yes	No	Yes	KW	Materials Science	F	90	70	30	14	No	Under-7	M	DD	High	Yes	Yes	75	18.9238	67.7507	267.358	39.5676	781.819
Male	24	Government	No	Yes	Mid	Mobile Data	4G	0	No	Mobile	0.5	No	No	2	Never	No	Yes	No	Yes	JO	Neuroscience	F	70	88	55	40	Yes	Under-7	H	BA	Low	Yes	Yes	57	21.477	69.0596	199.947	60.3644	849.329
Female	22	Non Government	No	Yes	Mid	Wifi	4G	2024-01-03	No	Mobile	1	No	Yes	0	Always	No	No	Yes	Yes	LEB	Chemistry	F	77	80	51	80	No	Under-7	M	BA	Low	Yes	Yes	55	19.9347	45.0504	750.486	35.1128	549.39
Male	19	Government	No	No	Mid	Mobile Data	3G	0	No	Mobile	0.5	Yes	No	0	3	No	Yes	Yes	Yes	KW	Computer Science	F	2	5	3	50	No	Above-7	L	BA	Low	Yes	Yes	71	29.1564	66.9314	340.761	32.7911	678.788
Male	20	Non Government	Yes	Yes	Poor	Mobile Data	3G	2024-01-03	Yes	Mobile	0.5	No	No	0	Never	No	Yes	No	Yes	JO	Geology	F	25	27	0	69	No	Above-7	L	AA	Moderate	Yes	Yes	84	27.6974	51.793	838.053	61.1901	979.436
Female	21	Non Government	No	Yes	Mid	Wifi	4G	2024-03-06	No	Mobile	1	Yes	Yes	8	Always	Yes	Yes	Yes	Yes	UAE	English	F	11	2	0	50	No	Above-7	L	BA	Moderate	Yes	Yes	80	25.6008	40.7897	996.048	44.8738	578.869
Male	23	Non Government	No	Yes	Mid	Wifi	4G	2024-03-06	Yes	Computer	1	Yes	No	0	Always	Yes	Yes	Yes	Yes	OM	Chemistry	F	0	8	11	70	Yes	Above-7	L	AA	Moderate	Yes	Yes	74	28.4575	58.0959	168.958	35.7224	533.892
Male	18	Government	Yes	Yes	Mid	Wifi	4G	0	No	Computer	1	No	No	0	Always	Yes	Yes	Yes	No	UAE	English	F	77	80	12	19	Yes	Above-7	M	AA	Low	Yes	Yes	63	27.6441	56.3561	525.732	55.4348	526.513
Male	24	Non Government	Yes	Yes	Mid	Wifi	4G	2024-03-06	Yes	Computer	0.5	No	Yes	0	Always	No	Yes	No	Yes	LEB	Engineering	F	25	29	40	17	No	Under-7	H	AA	Low	Yes	Yes	73	20.2388	69.565	821.856	84.9084	735.281
Male	22	Government	No	No	Poor	Mobile Data	3G	2024-01-03	No	Mobile	1	No	Yes	0	Never	No	Yes	No	No	SA	Computer Science	F	24	35	23	22	Yes	Above-7	M	AA	Moderate	Yes	Yes	63	28.7107	40.6019	810.056	73.4515	969.872
Female	22	Non Government	Yes	No	Mid	Mobile Data	3G	2024-01-03	Yes	Mobile	0.75	No	Yes	0	Always	No	No	Yes	Yes	OM	Computer Science	F	60	60	3	60	No	Under-7	M	BA	Moderate	Yes	Yes	72	24.4721	56.8824	783.997	78.937	765.214
Female	22	Non Government	No	Yes	Mid	Wifi	4G	2024-03-06	No	Computer	0.5	Yes	Yes	2	Sometimes	No	No	Yes	Yes	KW	Astronomy	F	21	12	0	50	Yes	Under-7	M	AA	Moderate	Yes	Yes	73	27.6893	32.081	414.095	82.3148	581.994
Female	18	Non Government	No	Yes	Mid	Wifi	4G	2024-01-03	No	Mobile	0.5	Yes	Yes	0	Sometimes	Yes	Yes	Yes	No	OM	Computer Science	F	0	4	8	30	No	Above-7	L	Fail	Low	No	No	78	28.7531	34.5458	508.468	88.3577	783.142
Male	22	Non Government	No	Yes	Mid	Mobile Data	4G	2024-01-03	No	Mobile	1	No	Yes	0	Always	Yes	No	Yes	Yes	JO	English	F	66	90	55	12	Yes	Above-7	M	BA	Moderate	Yes	Yes	63	21.816	30.1567	635.472	75.7948	774.905
Male	18	Non Government	No	Yes	Mid	Mobile Data	3G	2024-01-03	No	Mobile	0.5	No	No	12	Always	Yes	No	No	No	UAE	Computer Science	F	70	98	7	5	Yes	Under-7	M	AA	Moderate	Yes	Yes	66	19.3206	69.9784	976.547	66.5045	758.155
Female	18	Non Government	Yes	Yes	Mid	Wifi	4G	2024-01-03	Yes	Computer	0.75	Yes	Yes	0	Always	No	No	Yes	Yes	UAE	Biology	F	0	6	4	15	Yes	Under-7	L	BB	Moderate	Yes	Yes	62	20.7352	62.0909	394.793	51.9256	495.656
Female	24	Non Government	No	Yes	Poor	Mobile Data	3G	2024-01-03	No	Mobile	1	Yes	Yes	0	Always	No	Yes	Yes	No	KW	Astronomy	F	12	30	0	17	No	Above-7	L	BA	Low	Yes	Yes	78	23.1253	61.4689	930.829	40.8986	780.74
Female	22	Government	No	Yes	Mid	Mobile Data	4G	2024-01-03	No	Mobile	0.75	Yes	Yes	12	Sometimes	No	Yes	6	Yes	UAE	Mathematics	F	2	9	7	55	Yes	Under-7	M	BB	Low	Yes	Yes	66	27.8162	50.389	342.421	71.1996	658.099
Male	22	Government	No	Yes	Mid	Wifi	4G	2024-03-06	No	Mobile	0.75	No	No	0	Never	No	No	No	Yes	UAE	Astronomy	F	55	33	6	9	No	Above-7	L	AA	Moderate	Yes	Yes	71	28.3288	42.0027	990.167	89.697	411.155
Female	23	Government	No	Yes	Mid	Wifi	4G	2024-01-03	No	Mobile	0.75	No	Yes	0	Never	No	No	No	Yes	KW	Physics	F	12	10	20	16	No	Under-7	L	Fail	Low	No	No	74	18.0834	36.0506	703.237	58.0415	723.859
Male	23	Non Government	Yes	Yes	Rich	Wifi	4G	2024-01-03	Yes	Computer	0.5	Yes	Yes	0	Always	Yes	Yes	Yes	No	JO	English	F	70	90	2	2	Yes	Under-7	L	BB	High	Yes	Yes	70	24.129	41.387	517.16	73.4208	993.56
Female	24	Non Government	Yes	Yes	Mid	Wifi	3G	2024-03-06	Yes	Mobile	0.5	Yes	Yes	0	Always	Yes	Yes	No	No	OM	Computer Science	F	7	9	5	30	No	Above-7	L	AA	Moderate	Yes	Yes	67	23.0089	45.0388	652.051	59.7055	609.844
Male	20	Government	Yes	No	Mid	Mobile Data	3G	2024-01-03	No	Mobile	1	No	Yes	0	Sometimes	No	Yes	Yes	Yes	UAE	Materials Science	F	80	42	20	50	Yes	Under-7	M	CB	Low	Yes	Yes	62	20.6653	60.2524	345.278	55.916	979.336
Male	23	Non Government	Yes	No	Mid	Mobile Data	3G	2024-03-06	Yes	Mobile	1	No	Yes	0	Always	No	Yes	No	No	OM	Chemistry	S	0	3	10	3	No	Above-7	L	BB	High	Yes	Yes	54	19.4384	51.5865	346.756	54.6183	457.723
Male	24	Government	No	Yes	Poor	Mobile Data	4G	2024-01-03	No	Mobile	1	No	No	0	Always	Yes	Yes	Yes	Yes	JO	Neuroscience	S	12	60	0	70	Yes	Above-7	L	BB	Low	Yes	Yes	69	22.0514	33.0993	202.199	60.2775	839.47
Male	23	Non Government	Yes	Yes	Mid	Mobile Data	3G	2024-03-06	Yes	Mobile	0.75	No	Yes	0	Sometimes	No	Yes	Yes	Yes	KW	Mathematics	S	80	80	15	70	Yes	Under-7	H	AA	Moderate	Yes	Yes	58	29.3149	30.7212	202.645	52.0137	468.598
Male	23	Government	Yes	Yes	Mid	Wifi	4G	2024-03-06	No	Computer	0.5	Yes	Yes	0	Never	No	No	Yes	Yes	OM	Environmental Science	S	70	80	95	70	Yes	Under-7	H	BA	Low	Yes	Yes	68	21.8784	34.0933	412.905	74.9264	564.143
Female	18	Non Government	No	Yes	Poor	Mobile Data	3G	0	No	Mobile	0.5	Yes	Yes	0	Sometimes	No	No	Yes	No	SA	Environmental Science	S	70	80	95	70	Yes	Under-7	H	Fail	Low	No	No	70	24.2255	46.4199	786.57	82.4563	742.505
Female	20	Non Government	No	Yes	Mid	Mobile Data	4G	2024-01-03	No	Mobile	1	No	Yes	0	Always	Yes	No	No	Yes	OM	Materials Science	F	60	80	50	40	No	Under-7	M	BA	Moderate	Yes	Yes	53	26.4362	67.3277	647.174	82.9731	755.668
Female	20	Non Government	No	Yes	Poor	Mobile Data	4G	2024-01-03	No	Mobile	0.75	Yes	Yes	12	Sometimes	No	No	Yes	Yes	OM	Statistics	F	100	80	95	90	No	Under-7	H	Fail	Moderate	No	No	63	22.3636	55.4961	192.326	43.6619	865.127
Female	23	Non Government	No	Yes	Mid	Mobile Data	4G	2024-01-03	No	Mobile	0.75	Yes	No	2	Sometimes	No	No	Yes	Yes	LEB	Chemistry	F	100	85	85	70	No	Under-7	M	Fail	Moderate	No	No	68	29.6614	62.073	867.013	83.7545	769.187
Female	19	Non Government	No	Yes	Poor	Mobile Data	3G	2024-01-03	No	Mobile	0.5	Yes	Yes	0	Always	No	Yes	No	Yes	JO	Geology	F	10	60	5	20	Yes	Above-7	L	CC	Low	Yes	Yes	55	29.5494	48.655	641.231	50.4931	756.169
Male	21	Non Government	Yes	Yes	Mid	Mobile Data	3G	2024-03-06	Yes	Mobile	0.75	No	No	0	Never	No	Yes	Yes	No	JO	Engineering	S	19	65	50	10	No	Above-7	L	CC	Moderate	Yes	Yes	74	21.0214	44.4666	964.77	48.5585	947.412
Female	19	Non Government	Yes	Yes	Mid	Mobile Data	3G	2024-01-03	No	Mobile	0.75	No	No	0	Always	Yes	No	No	No	LEB	Astronomy	S	10	75	55	11	Yes	Under-7	M	AA	Moderate	Yes	Yes	55	23.967	34.336	703.167	73.6054	671.296
Female	24	Non Government	No	No	Mid	Mobile Data	3G	2024-01-03	No	Mobile	0.75	Yes	Yes	12	Sometimes	No	Yes	No	Yes	JO	Environmental Science	S	80	90	55	19	Yes	Under-7	H	CB	Moderate	Yes	Yes	73	21.6105	65.0373	257.657	48.2818	535.159
Male	24	Government	No	No	Poor	Mobile Data	3G	2024-01-03	No	Mobile	1	No	No	12	Always	Yes	No	Yes	No	UAE	Engineering	S	10	10	15	19	No	Above-7	L	BB	Low	Yes	Yes	69	21.4181	61.3264	526.405	33.178	497.073
Male	22	Non Government	No	Yes	Mid	Wifi	4G	2024-03-06	No	Computer	0.5	Yes	No	0	Always	Yes	Yes	No	No	KW	English	S	70	75	55	11	Yes	Under-7	M	AA	Moderate	Yes	Yes	68	18.4426	36.7247	683.648	52.4171	639.997
Male	23	Non Government	Yes	Yes	Poor	Wifi	3G	2024-03-06	No	Computer	0.5	Yes	No	0	Always	Yes	No	Yes	Yes	JO	Materials Science	S	100	75	50	70	Yes	Under-7	H	AA	Moderate	Yes	Yes	63	25.3148	50.4904	125.438	73.2879	827.652
Male	20	Non Government	No	Yes	Mid	Wifi	4G	0	No	Mobile	0.5	No	No	2	Never	No	No	No	Yes	OM	English	S	10	79	30	30	No	Under-7	M	AA	Low	Yes	Yes	47	24.0321	49.495	113.419	49.6175	425.526
Female	23	Non Government	No	Yes	Poor	Wifi	4G	2024-03-06	No	Mobile	0.5	Yes	No	2	Always	No	Yes	No	No	UAE	Computer Science	S	60	55	30	40	No	Under-7	M	AA	Low	Yes	Yes	65	18.6177	55.0037	216.463	67.7735	477.432
Female	18	Government	No	No	Mid	Mobile Data	2G	2024-01-03	No	Mobile	0.5	No	No	12	Always	Yes	No	Yes	Yes	LEB	Computer Science	S	100	75	50	70	Yes	Under-7	H	AA	Low	Yes	Yes	80	21.3438	67.8475	326.498	69.6072	463.668
Female	24	Non Government	No	Yes	Poor	Mobile Data	4G	2024-01-03	No	Mobile	0.5	No	No	2	Always	Yes	No	Yes	Yes	OM	Geology	S	80	80	51	59	Yes	Under-7	H	BA	Moderate	Yes	Yes	57	28.8992	53.1909	486.594	74.0242	751.15
Male	22	Government	No	No	Mid	Wifi	4G	2024-01-03	No	Mobile	0.75	No	No	0	Always	No	Yes	Yes	Yes	KW	Neuroscience	S	23	63	71	89	Yes	Under-7	M	CC	Low	Yes	Yes	106	20.8747	51.6087	538.696	83.8278	545.719
Male	21	Non Government	No	Yes	Rich	Mobile Data	4G	2024-01-03	No	Mobile	0.5	Yes	Yes	2	Sometimes	No	Yes	Yes	Yes	LEB	Physics	S	100	91	98	40	Yes	Under-7	H	BA	High	Yes	Yes	74	19.7387	32.0129	224.225	55.9539	499.756
Male	22	Non Government	No	Yes	Rich	Wifi	4G	2024-01-03	No	Mobile	0.5	No	Yes	0	Always	No	No	No	Yes	SA	Biology	S	10	51	40	40	No	Above-7	L	CC	Moderate	Yes	Yes	94	23.8734	32.5163	706.052	39.9859	755.662
Male	20	Non Government	Yes	Yes	Mid	Wifi	4G	2024-03-06	No	Computer	0.5	No	No	12	Never	No	Yes	No	No	UAE	Chemistry	S	70	50	33	41	No	Above-7	M	Fail	Low	No	No	68	29.8278	37.4939	636.524	49.1355	856.786
Male	22	Government	Yes	Yes	Mid	Mobile Data	3G	2024-01-03	No	Computer	0.5	No	No	12	Sometimes	No	No	No	Yes	JO	Computer Science	S	70	58	73	91	Yes	Under-7	H	BA	Low	Yes	Yes	81	20.9047	31.2988	365.018	55.93	599.293
Male	21	Non Government	No	Yes	Poor	Mobile Data	4G	2024-01-03	No	Mobile	0.75	Yes	Yes	8	Sometimes	No	Yes	No	Yes	LEB	English	S	70	50	30	49	Yes	Under-7	M	Fail	Low	No	No	67	26.0656	59.7341	112.294	72.8335	746.923
Male	23	Government	Yes	Yes	Rich	Wifi	4G	2024-01-03	No	Computer	0.75	No	No	0	Always	Yes	No	No	No	JO	Materials Science	S	70	50	33	40	No	Under-7	M	Fail	High	No	No	68	27.1394	58.9332	169.883	30.7873	458.875
Female	21	Non Government	No	Yes	Mid	Mobile Data	4G	2024-01-03	No	Mobile	1	No	No	0	Always	Yes	No	No	Yes	KW	Environmental Science	S	22	51	48	10	No	Above-7	L	AA	Moderate	Yes	Yes	74	20.8517	35.4422	452.525	48.9471	961.115
Male	20	Non Government	Yes	Yes	Mid	Mobile Data	3G	2024-01-03	Yes	Computer	0.75	Yes	Yes	12	Never	No	No	Yes	Yes	LEB	Physics	S	62	68	48	80	Yes	Under-7	M	BA	Moderate	Yes	Yes	59	26.7386	63.4432	238.577	76.7906	602.138
Male	18	Non Government	Yes	Yes	Mid	Wifi	3G	2024-01-03	Yes	Mobile	0.5	No	No	0	Always	No	Yes	No	Yes	SA	Astronomy	S	82	89	58	50	Yes	Under-7	H	BA	Low	Yes	Yes	64	22.4134	36.1914	439.138	70.2515	998.503
Male	19	Non Government	Yes	No	Mid	Mobile Data	3G	2024-03-06	Yes	Mobile	1	No	Yes	0	Always	Yes	No	No	No	JO	Materials Science	S	72	80	58	66	No	Under-7	M	AA	High	Yes	Yes	55	25.5877	42.047	665.364	73.9044	987.153
Male	19	Government	No	No	Poor	Mobile Data	4G	2024-01-03	No	Mobile	0.5	No	No	0	Always	Yes	No	No	Yes	UAE	Computer Science	S	70	82	3	73	No	Under-7	H	BA	Moderate	Yes	Yes	54	25.6024	39.9591	592.514	78.7086	867.294
Male	23	Government	No	No	Mid	Mobile Data	3G	0	No	Mobile	0.75	No	No	12	Always	Yes	No	No	No	OM	Chemistry	S	60	82	93	43	No	Above-7	M	BA	Low	Yes	Yes	56	24.4293	44.8923	308.058	76.9941	412.04
Female	24	Government	No	No	Poor	Mobile Data	4G	0	No	Mobile	0.5	No	No	2	Sometimes	No	No	Yes	No	KW	Astronomy	S	55	72	83	14	Yes	Above-7	M	BB	Low	Yes	Yes	69	19.0835	40.1866	409.44	70.931	726.085
Female	22	Non Government	No	Yes	Mid	Mobile Data	4G	2024-01-03	No	Mobile	1	Yes	No	0	Never	No	No	Yes	No	LEB	Geology	S	72	65	73	66	Yes	Under-7	H	AA	Moderate	Yes	Yes	57	28.0236	49.558	652.628	56.3797	452.102
Male	24	Government	No	No	Poor	Mobile Data	3G	2024-01-03	Yes	Mobile	1	No	No	0	Never	No	No	No	No	JO	Environmental Science	S	51	82	53	43	No	Under-7	M	AA	Low	Yes	Yes	75	21.8494	46.2963	874.77	89.0159	937.083
Male	24	Government	No	No	Mid	Mobile Data	4G	2024-01-03	No	Mobile	0.5	Yes	No	0	Always	Yes	Yes	Yes	No	UAE	Computer Science	S	80	92	83	43	Yes	Under-7	H	BB	High	Yes	Yes	58	20.2382	69.4628	777.892	64.1444	873.782
Female	19	Non Government	No	Yes	Mid	Mobile Data	4G	2024-01-03	No	Mobile	0.25	Yes	Yes	12	Always	Yes	Yes	No	No	KW	Neuroscience	S	60	52	23	33	Yes	Under-7	H	AA	Moderate	Yes	Yes	76	18.4893	32.2371	598.06	42.1662	983.404
Male	19	Government	Yes	Yes	Mid	Mobile Data	4G	2024-01-03	Yes	Mobile	0.5	No	No	2	Always	Yes	No	Yes	No	JO	Mathematics	S	30	12	29	23	No	Under-7	M	BA	Low	Yes	Yes	54	25.0907	35.6873	426.064	47.5688	765.03
Male	18	Non Government	Yes	Yes	Mid	Wifi	3G	2024-01-03	Yes	Computer	0.5	No	No	0	Always	No	Yes	No	No	JO	Astronomy	S	40	62	83	33	Yes	Under-7	H	BB	Moderate	Yes	Yes	68	26.1308	32.113	428.546	71.6137	713.304
Female	22	Government	No	Yes	Mid	Wifi	4G	2024-01-03	No	Mobile	0.5	No	Yes	0	Always	Yes	Yes	No	No	KW	Physics	S	60	52	23	33	No	Under-7	M	AA	Low	Yes	Yes	65	18.1991	55.0336	891.476	85.4844	711.384
Female	22	Non Government	No	Yes	Mid	Wifi	4G	2024-01-03	No	Mobile	0.5	Yes	No	0	Always	Yes	Yes	Yes	No	UAE	Statistics	S	20	22	53	13	No	Above-7	L	AA	Low	Yes	Yes	83	24.1451	32.1804	135.319	40.7232	631.869
Male	19	Non Government	Yes	Yes	Rich	Wifi	4G	2024-01-03	Yes	Computer	0.5	No	No	0	Never	No	No	No	No	JO	Astronomy	S	20	52	23	33	Yes	Above-7	L	BB	High	Yes	Yes	58	20.7179	63.4576	989.184	34.9408	681.214
Male	21	Government	No	Yes	Mid	Mobile Data	4G	2024-01-03	No	Mobile	0.75	No	No	0	Never	No	No	Yes	Yes	JO	Mathematics	S	50	62	73	43	Yes	Above-7	M	CC	Moderate	Yes	Yes	72	25.7421	50.4775	697.938	82.8919	781.248
Male	22	Non Government	Yes	Yes	Mid	Wifi	4G	2024-03-06	No	Computer	1	Yes	Yes	0	Always	No	Yes	Yes	No	UAE	Environmental Science	S	10	2	13	53	No	Above-7	L	CC	Low	Yes	Yes	58	20.0924	51.0803	713.024	84.9167	959.769
Female	23	Non Government	No	Yes	Poor	Wifi	3G	2024-01-03	No	Mobile	0.5	Yes	No	0	Always	No	Yes	No	No	SA	English	S	60	52	23	33	Yes	Under-7	H	BB	Moderate	Yes	Yes	43	26.2913	52.4638	134.198	46.5828	757.531
Male	24	Government	Yes	Yes	Mid	Mobile Data	4G	2024-01-03	Yes	Mobile	0.5	No	No	2	Always	Yes	No	No	Yes	UAE	Chemistry	S	15	52	83	11	Yes	Under-7	M	AA	Low	Yes	Yes	79	22.6408	36.8325	644.976	52.6371	914.27
Female	20	Non Government	Yes	Yes	Mid	Mobile Data	3G	2024-01-03	No	Mobile	0.5	Yes	No	0	Always	Yes	Yes	No	No	SA	Computer Science	S	80	42	33	13	Yes	Under-7	H	BA	Low	Yes	Yes	59	29.2408	37.9076	536.3	69.6113	917.668
Female	20	Non Government	No	Yes	Poor	Mobile Data	3G	0	No	Mobile	0.5	No	No	2	Always	Yes	No	Yes	No	SA	Neuroscience	S	40	51	20	33	No	Under-7	M	BA	Low	Yes	Yes	61	19.6503	42.7527	195.201	49.7958	711.3
Male	23	Government	No	Yes	Mid	Wifi	4G	2024-01-03	No	Computer	0.75	No	No	12	Always	Yes	Yes	No	No	JO	Environmental Science	S	60	70	63	93	Yes	Under-7	H	AA	Moderate	Yes	Yes	106	22.0928	53.7399	350.13	82.6295	608.482
Male	22	Non Government	No	Yes	Mid	Wifi	4G	2024-01-03	No	Mobile	0.75	Yes	No	12	Always	Yes	Yes	Yes	Yes	JO	Mathematics	S	50	62	13	33	No	Above-7	L	BA	Low	Yes	Yes	80	19.3617	38.4047	901.283	36.4547	783.744
Female	19	Non Government	No	Yes	Mid	Wifi	4G	2024-01-03	No	Mobile	0.5	Yes	Yes	2	Sometimes	No	No	Yes	Yes	UAE	Computer Science	S	85	75	62	53	Yes	Under-7	H	AA	Moderate	Yes	Yes	63	29.0963	34.6533	594.99	32.2789	667.526
Female	19	Non Government	No	Yes	Rich	Wifi	4G	2024-03-06	No	Computer	1	No	No	0	Always	Yes	No	Yes	Yes	KW	Chemistry	S	25	15	32	53	No	Under-7	M	BA	Moderate	Yes	Yes	72	28.5281	68.8047	472.075	42.5092	448.865
Female	22	Non Government	No	Yes	Mid	Wifi	4G	2024-01-03	No	Mobile	0.5	No	No	0	Always	No	Yes	Yes	Yes	KW	Biology	S	10	35	30	13	No	Above-7	L	AA	Low	Yes	Yes	64	21.0953	30.8793	165.414	47.1653	626.685
Male	18	Non Government	No	Yes	Poor	Mobile Data	3G	2024-01-03	No	Mobile	0.5	No	No	2	Always	Yes	No	Yes	Yes	LEB	Chemistry	S	87	65	82	33	Yes	Under-7	H	AA	Low	Yes	Yes	67	25.9198	62.1079	742.709	36.7756	996.443
Female	24	Non Government	Yes	Yes	Mid	Mobile Data	3G	2024-01-03	No	Mobile	0.5	Yes	No	2	Always	No	Yes	No	Yes	OM	Statistics	S	85	15	22	53	Yes	Under-7	M	AA	Moderate	Yes	Yes	72	27.8067	61.5214	732.566	33.9414	429.107
Female	19	Government	No	Yes	Mid	Mobile Data	4G	2024-01-03	No	Mobile	0.5	No	Yes	0	Never	No	Yes	No	Yes	OM	Chemistry	S	80	71	52	51	Yes	Under-7	M	AA	Low	Yes	Yes	69	24.6624	41.8886	652.639	75.3365	818
Male	23	Non Government	No	Yes	Mid	Mobile Data	4G	2024-01-03	No	Mobile	0.5	No	No	0	Always	Yes	No	Yes	No	UAE	Biology	S	75	71	72	53	Yes	Under-7	H	CB	Moderate	Yes	Yes	63	24.3558	35.4251	559.236	39.8566	904.713
Male	24	Non Government	No	Yes	Mid	Wifi	4G	2024-03-06	No	Tab	0.5	No	No	0	Always	Yes	Yes	Yes	Yes	KW	Geology	S	85	66	12	23	No	Under-7	M	AA	Moderate	Yes	Yes	68	20.9022	35.8251	490.406	84.8353	789.236
Male	20	Non Government	No	Yes	Poor	Wifi	4G	2024-01-03	No	Mobile	0.5	No	No	8	Always	Yes	No	Yes	No	SA	Mathematics	S	23	25	32	53	No	Under-7	L	BB	Low	Yes	Yes	63	19.1172	57.8973	633.944	52.08	741.849
Male	22	Non Government	Yes	Yes	Mid	Mobile Data	3G	2024-03-06	Yes	Mobile	0.5	No	No	0	Always	Yes	Yes	No	No	JO	Astronomy	S	15	25	37	13	Yes	Above-7	L	CC	Moderate	Yes	Yes	62	28.7666	55.7123	310.056	70.2363	824.533
Male	20	Non Government	Yes	Yes	Mid	Mobile Data	3G	2024-03-06	Yes	Mobile	0.5	No	No	0	Always	No	Yes	Yes	Yes	KW	Statistics	S	95	91	62	53	Yes	Under-7	M	BB	Moderate	Yes	Yes	52	28.805	61.3098	947.133	43.5241	657.606
Male	20	Government	No	No	Poor	Mobile Data	3G	0	No	Mobile	0.5	No	Yes	0	Always	No	No	Yes	No	UAE	English	S	81	75	62	53	No	Under-7	M	AA	Low	Yes	Yes	84	25.5972	67.4992	629.915	44.4194	454.817
Female	18	Government	No	No	Mid	Mobile Data	4G	0	No	Mobile	0.75	No	No	2	Never	Yes	No	Yes	Yes	UAE	Neuroscience	S	53	75	72	23	No	Under-7	M	BA	Low	Yes	Yes	69	22.0684	57.6771	380.073	64.4826	977.423
Male	21	Non Government	Yes	Yes	Mid	Wifi	3G	2024-01-03	Yes	Mobile	0.5	No	No	2	Sometimes	Yes	Yes	Yes	Yes	LEB	Physics	S	15	43	42	33	Yes	Under-7	M	AA	Low	Yes	Yes	80	22.1905	36.2341	504.712	63.6386	659.38
Male	20	Government	No	Yes	Poor	Mobile Data	4G	2024-01-03	No	Mobile	0.5	Yes	Yes	0	Always	Yes	Yes	No	No	KW	English	S	92	65	62	53	Yes	Under-7	H	CB	Low	Yes	Yes	60	26.7115	39.7377	825.116	76.1238	799.234
Male	19	Non Government	Yes	Yes	Poor	Mobile Data	4G	2024-01-03	No	Mobile	0.5	Yes	No	2	Always	Yes	Yes	Yes	No	KW	Materials Science	S	83	75	62	53	No	Under-7	H	AA	Moderate	Yes	Yes	62	28.7653	63.6877	245.454	75.4688	718.786
Male	24	Non Government	No	Yes	Mid	Mobile Data	3G	2024-01-03	No	Mobile	0.5	No	Yes	2	Always	Yes	Yes	Yes	No	KW	Chemistry	S	27	15	42	53	No	Above-7	L	CC	Moderate	Yes	Yes	74	28.645	38.3722	363.552	70.2413	432.804
Female	22	Government	No	Yes	Mid	Wifi	3G	2024-01-03	No	Mobile	0.5	No	No	12	Never	No	Yes	No	Yes	LEB	Mathematics	S	45	95	12	13	No	Under-7	M	BB	Low	Yes	Yes	70	27.3585	32.9009	711.557	56.9478	971.648
Male	22	Government	No	Yes	Mid	Mobile Data	4G	0	No	Mobile	0.5	Yes	No	8	Always	No	Yes	Yes	No	UAE	Chemistry	S	15	90	52	83	Yes	Under-7	H	BB	Low	Yes	Yes	72	25.7044	58.1312	383.94	83.4384	875.522
Male	21	Non Government	No	Yes	Poor	Mobile Data	3G	2024-01-03	No	Mobile	0.5	No	Yes	0	Always	Yes	Yes	Yes	No	SA	Engineering	S	45	58	52	43	Yes	Under-7	H	CC	Low	Yes	Yes	72	19.0097	46.1011	813.252	67.3547	489.459
Male	24	Non Government	No	Yes	Poor	Mobile Data	3G	2024-01-03	No	Mobile	0.5	Yes	Yes	0	Always	Yes	Yes	No	No	OM	English	S	25	5	12	33	Yes	Under-7	M	CB	Low	Yes	Yes	55	19.9395	66.8016	217.408	89.4119	988.989
Male	18	Non Government	Yes	Yes	Mid	Wifi	4G	2024-01-03	Yes	Mobile	0.5	No	No	12	Always	Yes	Yes	Yes	No	UAE	Computer Science	S	22	51	42	40	Yes	Under-7	M	BB	Moderate	Yes	Yes	72	28.7827	56.0102	786.418	79.1622	842.141
Male	19	Non Government	No	Yes	Poor	Mobile Data	3G	2024-01-03	No	Mobile	0.5	No	Yes	0	Always	Yes	Yes	No	No	JO	English	S	29	10	12	24	No	Above-7	L	CC	Low	Yes	Yes	58	25.2771	33.6168	161.517	32.6586	683.393
Male	22	Government	No	Yes	Mid	Wifi	4G	2024-01-03	No	Mobile	0.5	No	No	12	Sometimes	Yes	6	Yes	No	OM	Engineering	S	72	51	42	24	Yes	Above-7	H	BA	High	Yes	Yes	58	18.1104	67.9143	111.333	49.2356	766.822
Male	19	Non Government	Yes	Yes	Mid	Wifi	4G	2024-03-06	No	Computer	0.5	No	Yes	2	Always	No	Yes	Yes	No	JO	Materials Science	S	67	31	42	14	Yes	Under-7	M	CC	Moderate	Yes	Yes	66	19.2177	40.3423	908.401	64.3125	464.042
Male	24	Non Government	No	Yes	Poor	Mobile Data	3G	2024-01-03	No	Mobile	0.5	No	No	0	Never	No	No	Yes	Yes	LEB	Statistics	S	17	21	42	14	Yes	Under-7	M	BB	Low	Yes	Yes	73	25.962	43.4885	623.205	73.2882	736.247
Female	21	Government	No	Yes	Mid	Wifi	4G	2024-01-03	No	Mobile	0.75	No	No	2	Always	Yes	Yes	Yes	No	LEB	Computer Science	S	27	41	49	14	No	Under-7	M	CC	Low	Yes	Yes	63	18.0607	46.0904	416.644	63.0202	444.197
Female	23	Non Government	Yes	Yes	Mid	Wifi	3G	2024-03-06	Yes	Mobile	1	No	No	0	Always	Yes	No	No	Yes	OM	Geology	S	70	81	39	84	No	Under-7	M	BB	Low	Yes	Yes	63	19.9297	32.049	309.335	77.1678	726.913
Female	24	Government	No	No	Poor	Mobile Data	2G	2024-01-03	No	Mobile	0.5	No	No	12	Always	Yes	No	No	No	LEB	Neuroscience	S	27	90	82	14	Yes	Under-7	H	BA	Low	Yes	Yes	85	24.5848	49.8606	655.197	46.9593	731.617
Female	22	Government	No	No	Rich	Mobile Data	4G	2024-01-03	No	Mobile	0.5	No	No	0	Always	Yes	No	No	No	UAE	English	S	17	61	42	14	No	Under-7	M	CC	High	Yes	Yes	63	26.3027	34.9327	558.102	41.0347	924.663
Female	23	Government	No	No	Mid	Mobile Data	3G	2024-01-03	No	Mobile	0.5	Yes	Yes	12	Always	No	No	No	No	KW	Biology	S	87	81	42	19	Yes	Under-7	H	AA	Low	Yes	Yes	64	25.8235	46.0388	992.438	33.235	835.035
Female	24	Non Government	No	Yes	Mid	Wifi	4G	2024-03-06	No	Computer	0.75	Yes	No	0	Always	Yes	No	Yes	No	UAE	Geology	S	7	61	22	14	No	Above-7	L	CC	Moderate	Yes	Yes	67	20.6912	44.0284	984.894	64.3988	549.731
Female	18	Government	Yes	Yes	Mid	Mobile Data	4G	2024-01-03	No	Mobile	0.75	No	No	0	Always	Yes	No	No	Yes	LEB	English	S	17	50	2	4	No	Above-7	L	CC	Moderate	Yes	Yes	61	26.5462	60.9136	671.522	71.316	933.056
Male	20	Government	No	Yes	Rich	Mobile Data	4G	2024-01-03	No	Mobile	0.75	No	Yes	0	Always	Yes	Yes	Yes	Yes	SA	Neuroscience	S	5	21	42	14	No	Above-7	L	DD	Moderate	Yes	Yes	60	20.847	62.1268	498.583	49.569	743.946
Male	19	Non Government	No	Yes	Mid	Mobile Data	4G	2024-01-03	No	Mobile	0.75	No	No	0	Always	No	Yes	Yes	No	KW	Materials Science	S	27	41	32	61	Yes	Above-7	M	DC	Moderate	Yes	Yes	78	21.9048	36.1365	542.027	66.8151	763.828
Female	19	Non Government	No	Yes	Poor	Mobile Data	3G	0	No	Mobile	0.5	No	Yes	0	Always	No	Yes	Yes	Yes	UAE	Computer Science	S	87	88	40	10	Yes	Under-7	M	DC	Low	Yes	Yes	70	26.9579	44.662	714.231	33.1294	501.389
Male	20	Non Government	Yes	Yes	Poor	Wifi	3G	2024-03-06	No	Mobile	0.75	No	No	0	Always	No	Yes	Yes	No	JO	Computer Science	S	96	61	42	94	Yes	Under-7	H	DC	Low	Yes	Yes	68	25.7956	44.9341	191.417	35.9576	914.664
Male	22	Government	No	No	Mid	Mobile Data	3G	0	No	Mobile	0.75	No	No	0	Always	Yes	No	No	No	KW	Astronomy	S	57	51	46	34	Yes	Under-7	M	DD	Low	Yes	Yes	68	28.1907	36.0564	395.517	72.1053	958.579
Male	19	Non Government	Yes	Yes	Mid	Wifi	3G	2024-03-06	Yes	Computer	0.75	No	Yes	0	Always	No	Yes	No	No	KW	Physics	S	77	69	41	13	Yes	Under-7	M	DD	Moderate	Yes	Yes	68	25.8914	61.9381	167.745	52.0842	864.994
Male	24	Non Government	No	Yes	Mid	Mobile Data	4G	2024-03-06	No	Mobile	0.25	No	Yes	2	Always	Yes	Yes	No	No	LEB	Physics	S	80	51	40	24	No	Under-7	M	CB	Moderate	Yes	Yes	82	24.8197	58.2891	166.025	70.28	964.451
Female	22	Non Government	No	Yes	Mid	Mobile Data	3G	2024-01-03	No	Mobile	0.25	No	No	2	Sometimes	No	6	No	Yes	OM	Mathematics	S	62	61	82	40	Yes	Under-7	M	DD	Moderate	Yes	Yes	97	19.1241	37.6153	276.255	79.9033	581.38
Male	24	Non Government	No	Yes	Mid	Mobile Data	3G	2024-01-03	No	Mobile	0.75	Yes	Yes	0	Always	Yes	Yes	Yes	No	KW	Computer Science	S	72	83	12	90	Yes	Under-7	H	CB	Moderate	Yes	Yes	74	22.4126	44.6689	536.728	81.1573	916.672
Female	20	Non Government	No	No	Mid	Wifi	4G	0	No	Mobile	0.75	No	No	0	Always	Yes	Yes	Yes	No	OM	Statistics	S	87	81	22	70	Yes	Under-7	H	BB	Low	Yes	Yes	62	21.1824	34.2322	806.297	40.3301	693.336
Female	20	Non Government	Yes	Yes	Mid	Mobile Data	3G	2024-01-03	No	Mobile	0.5	Yes	No	0	Sometimes	Yes	Yes	Yes	Yes	LEB	Biology	S	72	90	12	30	No	Under-7	M	CB	Moderate	Yes	Yes	64	20.9279	55.1283	536.946	59.1771	498.35
Male	21	Non Government	Yes	Yes	Mid	Mobile Data	3G	2024-03-06	Yes	Mobile	0.5	Yes	No	0	Always	No	Yes	No	No	OM	Physics	S	2	11	62	30	No	Under-7	L	BB	Moderate	Yes	Yes	56	29.6761	34.8549	401.929	74.0356	801.28
Male	18	Non Government	No	Yes	Poor	Mobile Data	4G	2024-01-03	No	Mobile	0.75	Yes	No	2	Always	Yes	No	Yes	No	UAE	Environmental Science	S	5	3	2	10	Yes	Under-7	L	DD	Low	Yes	Yes	71	22.7172	69.4374	174.118	76.4388	810.472
Male	23	Non Government	No	Yes	Mid	Mobile Data	3G	2024-01-03	No	Mobile	0.5	No	No	12	Always	Yes	Yes	No	Yes	UAE	Materials Science	S	73	84	77	81	Yes	Above-7	H	DD	Moderate	Yes	Yes	54	28.7046	61.2273	595.266	77.0806	572.155
Female	23	Non Government	No	Yes	Poor	Mobile Data	3G	2024-01-03	No	Mobile	0.5	Yes	No	12	Always	No	Yes	No	No	LEB	Statistics	S	5	17	21	10	No	Above-7	L	DD	Moderate	Yes	Yes	52	25.5737	45.6095	344.142	43.69	416.496
Female	24	Non Government	No	Yes	Poor	Wifi	3G	2024-01-03	No	Mobile	1	No	No	2	Always	Yes	Yes	Yes	No	LEB	Geology	S	51	42	12	29	No	Above-7	M	CB	Moderate	Yes	Yes	75	27.5377	53.1426	653.441	41.5521	519.908
Female	24	Non Government	Yes	Yes	Mid	Wifi	4G	2024-01-03	Yes	Mobile	0.75	No	No	0	Never	No	No	Yes	Yes	UAE	Neuroscience	S	9	7	21	20	Yes	Above-7	L	CC	Moderate	Yes	Yes	55	24.0316	66.4537	979.469	65.4007	639.867
Female	24	Non Government	No	Yes	Mid	Wifi	4G	0	No	Mobile	0.5	No	Yes	2	Always	Yes	No	No	Yes	KW	English	F	19	72	15	50	Yes	Above-7	M	DC	Low	Yes	Yes	63	24.9228	52.164	200.183	74.4651	500.538
Male	18	Government	No	Yes	Mid	Wifi	4G	2024-01-03	No	Mobile	0.75	No	Yes	0	Always	Yes	Yes	No	Yes	LEB	Biology	S	32	80	58	46	Yes	Above-7	M	DC	High	Yes	Yes	79	23.9102	36.9799	290.913	49.1484	516.418
Male	18	Non Government	Yes	No	Mid	Wifi	4G	2024-03-06	Yes	Computer	0.5	No	No	0	Always	Yes	No	No	No	UAE	Materials Science	S	32	60	58	66	Yes	Above-7	M	DC	Moderate	Yes	Yes	69	20.3429	45.1481	525.785	36.2823	634.834
Male	21	Non Government	Yes	No	Poor	Mobile Data	3G	2024-03-06	Yes	Mobile	0.5	No	Yes	0	Sometimes	No	No	Yes	Yes	KW	Engineering	S	12	8	18	26	No	Above-7	L	DC	Moderate	Yes	Yes	67	26.6694	63.7258	971.752	73.0048	977.072
Male	21	Non Government	No	Yes	Mid	Wifi	4G	2024-03-06	No	Computer	1	Yes	Yes	0	Always	No	Yes	Yes	No	JO	Chemistry	S	52	10	13	6	No	Above-7	L	DC	Moderate	Yes	Yes	62	21.3693	55.7685	794.629	47.9819	858.546
Female	22	Government	No	Yes	Mid	Mobile Data	4G	0	No	Mobile	0.5	No	No	0	Always	Yes	No	No	No	KW	Geology	S	72	80	58	66	Yes	Above-7	M	DD	Low	Yes	Yes	95	18.2918	56.029	908.406	39.9818	591.849
Female	23	Non Government	No	Yes	Mid	Wifi	2G	2024-03-06	No	Mobile	None	Yes	No	0	Always	No	Yes	No	No	KW	Physics	S	72	80	58	66	Yes	Above-7	M	CB	Moderate	Yes	Yes	72	25.7457	64.6729	400.343	38.8634	970.962
Male	23	Non Government	Yes	Yes	Mid	Wifi	4G	2024-01-03	No	Mobile	0.5	No	No	0	Always	Yes	No	No	No	LEB	Physics	S	92	80	88	76	Yes	Under-7	H	DC	Low	Yes	Yes	72	20.1253	65.7589	992.835	48.8946	787.388
Female	24	Government	No	Yes	Mid	Mobile Data	4G	2024-01-03	No	Mobile	1	Yes	Yes	0	Sometimes	No	No	No	Yes	SA	Geology	S	72	80	98	96	Yes	Under-7	H	CC	Low	Yes	Yes	64	29.2855	66.7917	192.55	65.5607	673.27
Male	18	Non Government	No	Yes	Mid	Mobile Data	4G	2024-01-03	No	Mobile	0.75	No	Yes	0	Sometimes	No	No	No	No	SA	Astronomy	S	72	80	58	86	Yes	Under-7	M	DD	Moderate	Yes	Yes	58	29.4471	33.794	147.676	51.5041	680.98
Female	19	Government	No	Yes	Rich	Wifi	4G	2024-01-03	No	Mobile	0.75	Yes	No	0	Always	No	No	Yes	No	LEB	Materials Science	S	22	20	18	6	No	Above-7	L	DC	Moderate	Yes	Yes	72	28.9784	51.765	870.042	31.2397	646.447
Female	24	Non Government	No	No	Mid	Wifi	4G	2024-03-06	No	Mobile	0.75	No	Yes	0	Never	No	No	No	Yes	SA	Geology	S	12	20	38	46	No	Above-7	M	DD	Moderate	Yes	Yes	55	22.4419	59.6204	934.538	35.8145	539.795
Female	22	Non Government	No	No	Mid	Mobile Data	3G	0	No	Mobile	0.5	No	No	0	Never	No	No	No	Yes	LEB	Engineering	S	70	92	83	85	Yes	Under-7	H	DD	Low	Yes	Yes	83	18.1855	60.2771	181.527	47.4302	631.979
Female	20	Non Government	No	Yes	Poor	Wifi	4G	2024-01-03	No	Mobile	0.75	No	No	0	Sometimes	No	Yes	Yes	Yes	SA	Geology	S	50	40	52	66	Yes	Under-7	M	DC	Moderate	Yes	Yes	63	29.1398	54.2686	202.085	69.5823	716.738
Male	20	Non Government	Yes	Yes	Mid	Wifi	3G	2024-03-06	Yes	Computer	0.75	No	No	2	Always	No	No	Yes	Yes	LEB	Engineering	S	80	94	62	77	Yes	Under-7	H	DD	Moderate	Yes	Yes	64	23.1382	36.6715	129.857	35.9109	716.816
Male	22	Non Government	No	Yes	Poor	Mobile Data	3G	2024-01-03	No	Mobile	0.5	No	No	0	Always	No	No	Yes	Yes	KW	Materials Science	S	87	48	82	96	No	Above-7	M	DD	Low	Yes	Yes	78	29.5999	61.8968	194.057	63.6394	857.042
Male	22	Non Government	Yes	Yes	Mid	Mobile Data	3G	2024-03-06	Yes	Mobile	0.75	No	No	12	Always	No	Yes	Yes	No	JO	Chemistry	S	70	40	2	16	No	Above-7	L	DD	Moderate	Yes	Yes	70	29.5634	58.8045	288.478	37.1932	615.279
Male	19	Government	Yes	Yes	Mid	Mobile Data	3G	2024-01-03	Yes	Mobile	0.5	No	No	0	Sometimes	No	Yes	No	Yes	JO	Neuroscience	S	65	86	62	40	No	Above-7	M	BB	Moderate	Yes	Yes	70	28.2361	33.4454	973.069	42.6969	830.079
Male	19	Non Government	No	Yes	Mid	Wifi	4G	2024-03-06	No	Computer	0.75	Yes	Yes	0	Always	Yes	No	No	No	UAE	English	S	15	6	32	40	Yes	Under-7	H	DD	Moderate	Yes	Yes	68	21.5334	48.5524	701.074	40.3313	746.855
Female	19	Non Government	No	Yes	Mid	Wifi	4G	2024-01-03	No	Mobile	0.75	No	Yes	0	Always	No	No	No	Yes	LEB	Statistics	S	19	74	32	17	No	Above-7	L	DD	Low	Yes	Yes	92	22.6212	36.9591	800.698	34.0337	977.107
Male	21	Government	No	No	Mid	Wifi	4G	2024-01-03	No	Mobile	0.75	Yes	Yes	0	Always	No	Yes	Yes	No	LEB	Environmental Science	S	69	76	82	94	No	Under-7	M	DC	Low	Yes	Yes	80	28.2136	43.4991	798.525	70.2798	631.171
Male	19	Government	No	No	Poor	Mobile Data	3G	2024-01-03	No	Mobile	1	No	Yes	2	Sometimes	Yes	Yes	No	Yes	JO	Statistics	S	39	26	12	44	No	Above-7	L	DC	Low	Yes	Yes	78	21.8031	30.7232	581.566	57.8042	940.73
Female	22	Non Government	No	Yes	Poor	Wifi	3G	2024-01-03	No	Mobile	0.5	No	Yes	0	Sometimes	No	Yes	No	Yes	JO	English	S	59	97	42	70	Yes	Under-7	H	DD	Moderate	Yes	Yes	72	20.0339	46.0132	817.74	79.8632	892.386
Male	21	Non Government	No	Yes	Mid	Mobile Data	3G	2024-01-03	No	Mobile	0.5	No	No	2	Never	No	Yes	No	Yes	SA	Environmental Science	S	10	17	12	40	Yes	Under-7	H	BA	Moderate	Yes	Yes	77	24.6816	51.9951	636.227	35.9335	782.599
Male	18	Government	No	Yes	Mid	Wifi	4G	2024-01-03	No	Mobile	1	No	Yes	0	Always	No	No	Yes	Yes	LEB	Materials Science	S	80	87	72	60	No	Under-7	H	BA	Moderate	Yes	Yes	60	29.2339	54.7833	383.091	38.684	792.709
Female	19	Non Government	No	Yes	Mid	Mobile Data	4G	2024-01-03	No	Mobile	0.5	Yes	No	0	3	No	Yes	Yes	Yes	KW	Physics	S	70	99	66	65	No	Under-7	M	BA	Moderate	Yes	Yes	61	26.3524	56.5396	604.999	48.3875	450.79
Male	19	Non Government	No	Yes	Poor	Mobile Data	3G	2024-01-03	No	Mobile	0.5	No	No	0	Never	No	Yes	No	Yes	UAE	Environmental Science	S	80	97	86	95	Yes	Under-7	M	AA	Low	Yes	Yes	80	24.8407	63.4517	580.158	75.952	970.135
Male	24	Government	Yes	Yes	Rich	Wifi	4G	2024-01-03	No	Mobile	1	Yes	Yes	8	Always	Yes	Yes	Yes	Yes	KW	Mathematics	S	69	34	12	17	No	Above-7	L	BA	High	Yes	Yes	85	19.1661	38.6185	841.108	48.3455	464.162
Female	18	Non Government	No	Yes	Poor	Mobile Data	3G	2024-01-03	No	Mobile	1	Yes	No	0	Always	Yes	Yes	Yes	Yes	JO	Geology	S	10	17	12	14	No	Above-7	L	AA	Low	Yes	Yes	63	25.3801	34.8193	983.554	54.5051	737.94
Male	23	Non Government	Yes	Yes	Mid	Mobile Data	3G	2024-03-06	Yes	Mobile	1	No	No	0	Always	Yes	Yes	Yes	No	JO	English	S	61	97	82	64	Yes	Above-7	M	AA	Low	Yes	Yes	60	29.8806	64.0615	469.938	48.0962	598.042
Female	22	Non Government	No	Yes	Mid	Wifi	4G	2024-03-06	No	Mobile	0.5	No	Yes	0	Always	No	Yes	No	Yes	OM	Neuroscience	S	21	27	52	34	Yes	Above-7	M	AA	Moderate	Yes	Yes	65	19.681	36.2645	787.052	34.8135	657.911
Male	22	Non Government	No	Yes	Poor	Mobile Data	4G	2024-01-03	No	Mobile	1	No	Yes	0	Never	No	Yes	No	No	UAE	Astronomy	S	49	94	42	7	No	Above-7	M	AA	Low	Yes	Yes	65	24.22	68.9904	189.787	86.366	766.11
Male	21	Government	No	Yes	Mid	Wifi	4G	2024-01-03	No	Mobile	0.75	No	Yes	0	Always	No	No	Yes	Yes	OM	Computer Science	F	70	64	42	32	No	Under-7	M	BA	Low	Yes	Yes	62	28.5285	63.7015	799.148	62.9123	945.311
Female	24	Non Government	No	Yes	Poor	Wifi	4G	2024-01-03	No	Mobile	0.5	Yes	Yes	2	Sometimes	No	No	Yes	Yes	SA	English	S	79	84	82	37	No	Under-7	H	AA	Moderate	Yes	Yes	62	26.8892	50.0351	434.275	77.27	674.54
Female	18	Government	No	Yes	Mid	Wifi	4G	2024-01-03	No	Mobile	0.5	Yes	Yes	0	Sometimes	Yes	Yes	Yes	No	LEB	Materials Science	F	19	80	12	17	Yes	Above-7	M	Fail	Moderate	No	No	81	26.3642	69.2569	135.451	69.5014	992.638
Female	18	Government	No	Yes	Mid	Wifi	4G	2024-01-03	Yes	Mobile	1	No	Yes	0	Always	Yes	No	Yes	Yes	UAE	Astronomy	S	11	70	32	29	Yes	Above-7	M	BA	Low	Yes	Yes	75	26.4298	33.8951	426.922	60.8553	755.687
Female	18	Non Government	No	Yes	Mid	Wifi	4G	2024-01-03	No	Mobile	0.5	No	No	12	Always	Yes	No	No	No	SA	Statistics	F	10	8	10	10	Yes	Above-7	M	AA	Moderate	Yes	Yes	50	22.3139	42.1226	649.578	35.3807	496.332
Male	19	Non Government	No	Yes	Poor	Mobile Data	4G	2024-01-03	Yes	Mobile	0.75	Yes	Yes	0	Always	No	No	Yes	Yes	KW	Astronomy	S	18	28	40	20	Yes	Above-7	M	BB	High	Yes	Yes	66	21.5231	55.529	207.325	68.564	514.006
Male	23	Non Government	Yes	Yes	Mid	Mobile Data	4G	2024-01-03	No	Mobile	1	Yes	Yes	0	Always	No	Yes	Yes	No	UAE	Mathematics	F	90	84	52	30	No	Under-7	H	BA	Moderate	Yes	Yes	64	27.7123	44.0003	931.631	39.3222	829.667
Male	24	Non Government	No	Yes	Mid	Wifi	4G	2024-03-06	No	Mobile	0.75	Yes	Yes	12	Sometimes	No	Yes	6	Yes	JO	Astronomy	S	92	81	32	36	No	Under-7	M	BB	Moderate	Yes	Yes	72	27.7214	67.1349	169.905	54.863	430.239
Male	18	Government	No	Yes	Mid	Mobile Data	4G	2024-01-03	No	Mobile	0.75	No	No	0	Never	No	No	No	Yes	KW	Biology	F	42	21	2	16	No	Under-7	M	AA	Moderate	Yes	Yes	74	28.4049	32.625	937.006	67.7468	688.205
Female	23	Non Government	No	Yes	Mid	Mobile Data	3G	2024-01-03	No	Mobile	0.75	No	Yes	0	Never	No	No	No	Yes	OM	English	S	22	20	6	26	No	Under-7	H	Fail	Moderate	No	No	68	28.9589	51.9765	736.424	76.9337	488.931
Female	18	Non Government	No	Yes	Mid	Mobile Data	2G	2024-01-03	No	Mobile	0.5	Yes	Yes	0	Always	Yes	Yes	Yes	No	OM	Materials Science	F	95	82	82	70	Yes	Under-7	H	BB	Low	Yes	Yes	68	24.1361	53.6347	396.741	71.1027	659.931
Male	23	Non Government	No	Yes	Mid	Mobile Data	4G	2024-01-03	No	Mobile	0.5	Yes	Yes	0	Always	Yes	Yes	No	No	UAE	English	S	90	62	80	60	Yes	Under-7	H	AA	Moderate	Yes	Yes	68	24.0182	56.1091	451.675	70.292	849.95
Female	19	Non Government	Yes	Yes	Mid	Mobile Data	3G	2024-01-03	No	Mobile	1	No	Yes	0	Sometimes	No	Yes	Yes	Yes	LEB	English	F	72	21	22	26	Yes	Under-7	H	CB	Low	Yes	Yes	54	27.5795	40.2266	766.728	38.9425	675.288
Female	18	Government	No	No	Mid	Mobile Data	2G	2024-01-03	No	Mobile	1	No	Yes	0	Always	No	Yes	No	No	KW	English	S	92	31	42	27	Yes	Under-7	H	BB	Low	Yes	Yes	53	25.7996	44.5827	641.324	50.7677	498.071
Male	20	Non Government	No	No	Poor	Mobile Data	4G	2024-01-03	Yes	Mobile	1	No	No	0	Always	Yes	Yes	Yes	Yes	OM	Neuroscience	F	82	31	52	25	No	Under-7	M	BB	Low	Yes	Yes	71	26.4236	63.7472	704.479	32.5747	551.155
Male	24	Non Government	No	Yes	Mid	Mobile Data	3G	2024-01-03	No	Mobile	0.75	No	Yes	0	Sometimes	No	Yes	Yes	Yes	JO	Mathematics	S	72	41	46	27	No	Under-7	M	AA	Low	Yes	Yes	64	27.5495	37.7977	450.248	73.1686	620.524
Male	18	Government	No	No	Poor	Mobile Data	4G	0	No	Mobile	0.5	Yes	Yes	0	Never	No	No	Yes	Yes	UAE	Neuroscience	F	74	71	56	37	No	Under-7	H	BA	Low	Yes	Yes	78	28.6801	63.0747	539.032	87.1552	441.737
Female	18	Government	No	No	Mid	Mobile Data	4G	0	No	Mobile	0.5	Yes	Yes	0	Sometimes	No	No	Yes	No	JO	Geology	S	74	60	56	37	No	Under-7	H	Fail	Low	No	No	58	22.0559	52.5062	990.881	45.8466	750.603
Female	18	Non Government	Yes	Yes	Mid	Wifi	4G	2024-01-03	No	Mobile	1	No	Yes	0	Always	Yes	No	No	Yes	OM	Materials Science	F	95	94	72	80	No	Under-7	H	BA	Low	Yes	Yes	60	22.507	60.4875	292.531	35.2618	764.52
Male	19	Non Government	Yes	Yes	Poor	Wifi	4G	2024-01-03	Yes	Computer	0.75	Yes	Yes	12	Sometimes	No	No	Yes	Yes	KW	Environmental Science	S	97	87	82	86	No	Under-7	H	Fail	High	No	No	90	19.1278	58.5443	476.071	58.5342	437.291
Male	23	Non Government	No	No	Mid	Mobile Data	4G	2024-01-03	Yes	Mobile	0.75	Yes	No	2	Sometimes	No	No	Yes	Yes	JO	Physics	F	40	38	32	36	No	Above-7	M	Fail	Moderate	No	No	76	24.9394	38.3005	362.641	81.4019	641.387
Male	20	Government	Yes	No	Poor	Mobile Data	4G	0	No	Mobile	0.5	Yes	Yes	0	Always	No	Yes	No	Yes	KW	Computer Science	S	41	39	35	39	Yes	Above-7	M	CC	Low	Yes	Yes	53	18.4313	52.7525	788.6	63.1185	648.4
Male	21	Non Government	Yes	Yes	Mid	Mobile Data	3G	2024-03-06	Yes	Mobile	0.75	No	No	0	Never	No	Yes	Yes	No	OM	Engineering	F	51	79	85	89	Yes	Under-7	H	CC	Moderate	Yes	Yes	63	23.5872	64.7089	787.611	32.8066	600.292
Male	18	Non Government	No	Yes	Mid	Wifi	4G	0	No	Mobile	0.75	No	No	0	Always	Yes	No	No	No	KW	English	S	81	79	91	85	Yes	Under-7	H	AA	Low	Yes	Yes	53	24.5117	47.2846	363.201	88.4563	734.644
Male	19	Non Government	No	Yes	Mid	Wifi	4G	0	No	Mobile	0.75	Yes	Yes	12	Sometimes	No	Yes	No	Yes	KW	Biology	F	71	70	65	69	Yes	Under-7	M	CB	Low	Yes	Yes	43	21.4385	68.6636	173.251	79.719	607.574
Male	19	Non Government	No	Yes	Poor	Mobile Data	4G	2024-01-03	No	Mobile	1	No	No	12	Always	Yes	No	Yes	No	JO	Astronomy	S	75	71	76	80	Yes	Under-7	M	BB	Moderate	Yes	Yes	73	25.09	48.0886	110.289	37.8956	649.846
Male	18	Non Government	No	Yes	Mid	Mobile Data	4G	2024-01-03	No	Mobile	0.5	Yes	No	0	Always	Yes	Yes	No	No	KW	Mathematics	F	49	36	32	44	No	Above-7	L	AA	Moderate	Yes	Yes	82	18.366	35.7114	484.705	85.3079	878.514
Male	19	Non Government	No	Yes	Mid	Wifi	4G	2024-01-03	No	Mobile	0.5	Yes	No	0	Always	Yes	No	Yes	Yes	JO	Physics	S	42	24	12	24	No	Above-7	L	AA	Moderate	Yes	Yes	71	18.4482	45.5774	469.304	57.0413	497.266
Female	24	Non Government	No	Yes	Mid	Mobile Data	4G	2024-01-03	No	Mobile	0.5	No	No	2	Never	No	No	No	Yes	KW	Physics	F	90	86	82	74	Yes	Under-7	H	AA	Moderate	Yes	Yes	64	27.8712	68.0681	989.551	52.3139	771.469
Female	20	Government	No	Yes	Mid	Mobile Data	4G	2024-01-03	Yes	Mobile	0.5	Yes	No	2	Always	No	Yes	No	No	UAE	Physics	S	62	64	72	84	Yes	Under-7	H	AA	Moderate	Yes	Yes	70	22.3223	42.7888	522.822	57.6632	703.357
Female	23	Government	No	Yes	Rich	Mobile Data	4G	2024-01-03	Yes	Mobile	0.5	No	No	12	Always	Yes	No	Yes	Yes	UAE	Geology	F	90	86	82	74	Yes	Above-7	M	AA	Low	Yes	Yes	92	19.5247	64.7239	330.777	80.0743	583.043
Male	20	Non Government	No	Yes	Poor	Mobile Data	4G	2024-01-03	No	Mobile	0.5	No	No	2	Always	Yes	No	Yes	Yes	SA	Materials Science	S	62	64	72	84	Yes	Above-7	M	BA	Moderate	Yes	Yes	62	24.2669	65.25	902.106	69.5688	836.521
Male	22	Non Government	No	Yes	Rich	Wifi	4G	2024-03-06	No	Tab	0.75	No	No	0	Always	No	Yes	Yes	Yes	OM	Neuroscience	F	98	87	86	84	No	Under-7	H	CC	High	Yes	Yes	65	27.2399	44.0075	541.961	33.5549	730.713
Female	22	Government	No	No	Mid	Mobile Data	4G	2024-01-03	No	Mobile	0.5	Yes	Yes	2	Sometimes	No	Yes	Yes	Yes	KW	Statistics	S	72	74	82	89	No	Under-7	H	BA	Moderate	Yes	Yes	92	20.5899	33.3303	639.258	87.4563	686.417
Male	20	Non Government	No	Yes	Mid	Mobile Data	4G	2024-01-03	No	Mobile	0.5	No	Yes	0	Always	No	No	No	Yes	SA	Statistics	F	18	17	26	34	No	Above-7	M	CC	Moderate	Yes	Yes	74	25.4747	58.9823	186.102	38.867	800.602
Male	24	Non Government	No	Yes	Mid	Wifi	4G	2024-01-03	No	Mobile	0.5	No	No	12	Never	No	Yes	No	No	JO	Biology	S	32	14	32	29	No	Above-7	M	Fail	Moderate	No	No	62	19.0242	42.4605	444.625	74.7341	881.374
Male	19	Non Government	No	Yes	Rich	Wifi	4G	2024-03-06	No	Computer	0.5	No	No	12	Sometimes	No	No	No	Yes	SA	English	F	10	12	20	13	No	Above-7	L	BA	High	Yes	Yes	61	18.6202	61.3169	949.801	68.1682	983.601
Male	24	Non Government	Yes	Yes	Mid	Mobile Data	3G	2024-03-06	Yes	Mobile	0.75	Yes	Yes	8	Sometimes	No	Yes	No	Yes	OM	Statistics	S	22	34	15	9	No	Above-7	L	Fail	Moderate	No	No	69	24.3763	47.7062	630.555	41.2517	777.61
Male	18	Non Government	No	Yes	Mid	Wifi	4G	2024-01-03	No	Mobile	0.75	No	No	0	Always	Yes	No	No	No	SA	Biology	F	11	20	21	23	No	Under-7	M	Fail	Low	No	No	70	24.4876	49.4107	410.052	40.2439	924.664
Female	23	Non Government	No	Yes	Poor	Mobile Data	4G	2024-01-03	No	Mobile	1	No	No	0	Always	Yes	No	No	Yes	KW	Environmental Science	S	12	44	25	39	No	Under-7	M	AA	Moderate	Yes	Yes	64	25.6492	61.1164	663.1	82.2197	400.655
Male	24	Government	No	No	Poor	Mobile Data	4G	2024-03-06	No	Mobile	0.75	Yes	Yes	12	Never	No	No	Yes	Yes	SA	Mathematics	F	15	50	24	43	Yes	Under-7	M	BA	Moderate	Yes	Yes	66	26.7131	45.2945	919.37	55.1817	718.141
Female	24	Non Government	No	Yes	Mid	Wifi	4G	2024-01-03	No	Computer	0.5	No	No	0	Always	No	Yes	No	Yes	SA	Geology	S	32	44	29	89	Yes	Under-7	M	BA	Low	Yes	Yes	60	29.7102	47.7251	346.592	69.2746	528.789
Male	18	Government	Yes	Yes	Mid	Wifi	4G	2024-01-03	Yes	Tab	1	No	Yes	0	Always	Yes	No	No	No	KW	Environmental Science	F	65	59	74	83	Yes	Under-7	H	AA	Moderate	Yes	Yes	81	24.1956	45.0476	554.605	60.2443	456.515
Male	20	Non Government	No	Yes	Rich	Mobile Data	3G	2024-01-03	No	Mobile	0.5	No	No	0	Always	Yes	No	No	Yes	JO	Engineering	S	72	64	59	89	Yes	Under-7	H	BA	Moderate	Yes	Yes	62	21.8755	44.6936	962.822	73.6412	719.183
Male	21	Non Government	No	Yes	Mid	Wifi	4G	2024-03-06	No	Tab	0.75	No	No	12	Always	Yes	No	No	No	UAE	Mathematics	F	95	57	74	89	Yes	Above-7	M	BA	Moderate	Yes	Yes	54	27.5422	51.0379	255.157	58.7545	848.096
Male	19	Government	Yes	Yes	Mid	Mobile Data	3G	2024-01-03	Yes	Mobile	0.5	No	No	2	Sometimes	No	No	Yes	No	OM	English	S	82	84	79	79	Yes	Above-7	M	BB	Moderate	Yes	Yes	64	21.25	62.352	747.698	47.2428	647.364
Female	19	Non Government	No	Yes	Poor	Mobile Data	4G	2024-01-03	No	Mobile	1	Yes	No	0	Never	No	No	Yes	No	KW	Geology	F	25	29	34	33	No	Above-7	M	AA	Moderate	Yes	Yes	56	23.2677	44.4707	653.033	51.803	802.064
Female	24	Non Government	No	No	Mid	Wifi	4G	2024-01-03	No	Mobile	1	No	No	0	Never	No	No	No	No	SA	Chemistry	S	42	34	29	39	No	Above-7	M	AA	Low	Yes	Yes	51	18.9415	50.9702	711.708	81.5447	693.832
Male	24	Non Government	No	Yes	Poor	Mobile Data	3G	2024-01-03	No	Mobile	0.5	Yes	No	0	Always	Yes	Yes	Yes	No	OM	Astronomy	F	55	79	44	43	Yes	Under-7	H	BB	Moderate	Yes	Yes	82	18.3042	56.8291	416.098	58.0821	662.252
Male	21	Non Government	No	Yes	Mid	Wifi	4G	2024-01-03	No	Mobile	0.25	Yes	Yes	12	Always	Yes	Yes	No	No	UAE	Astronomy	S	62	64	69	49	Yes	Under-7	H	AA	Moderate	Yes	Yes	58	29.5518	40.7776	382.491	42.807	574.154
Female	18	Non Government	No	Yes	Mid	Wifi	4G	2024-01-03	No	Mobile	0.5	No	No	2	Always	Yes	No	Yes	No	UAE	Environmental Science	F	78	88	74	83	Yes	Under-7	H	BA	Moderate	Yes	Yes	72	28.0318	41.1009	715.789	86.0763	629.556
Female	19	Non Government	No	Yes	Poor	Mobile Data	3G	2024-01-03	No	Mobile	0.5	No	No	0	Always	No	Yes	No	No	OM	Engineering	S	72	84	89	89	Yes	Under-7	H	BB	Low	Yes	Yes	62	26.3517	67.3365	293.989	77.796	609.877
Male	20	Non Government	No	Yes	Mid	Wifi	4G	2024-03-06	No	Tab	0.5	No	Yes	0	Always	Yes	Yes	No	No	UAE	Materials Science	F	60	92	83	23	Yes	Under-7	H	AA	Moderate	Yes	Yes	63	22.9074	58.9414	477.689	33.34	787.712
Female	24	Government	No	Yes	Mid	Wifi	4G	0	No	Mobile	0.5	Yes	No	0	Always	Yes	Yes	Yes	No	OM	Chemistry	S	50	90	83	13	Yes	Under-7	H	AA	Low	Yes	Yes	68	20.0795	53.0875	269.357	89.9366	469.611
Female	18	Non Government	No	Yes	Mid	Wifi	4G	2024-01-03	No	Mobile	0.5	No	No	0	Never	No	No	No	No	JO	Astronomy	F	60	97	13	3	Yes	Under-7	H	BB	Low	Yes	Yes	77	19.8772	55.9088	107.474	71.6956	455.582
Female	18	Non Government	No	Yes	Poor	Mobile Data	3G	2024-01-03	No	Mobile	0.75	No	No	0	Never	No	No	Yes	Yes	UAE	Statistics	S	50	95	23	10	Yes	Under-7	H	CC	Low	Yes	Yes	74	21.0029	31.172	973.052	39.616	796.008
Male	19	Non Government	No	Yes	Rich	Mobile Data	3G	2024-01-03	No	Mobile	1	Yes	Yes	0	Always	No	Yes	Yes	No	UAE	Materials Science	F	60	87	23	11	Yes	Above-7	M	CC	Moderate	Yes	Yes	74	24.5907	54.7241	488.533	44.2301	727.779
Male	23	Non Government	No	Yes	Mid	Mobile Data	4G	0	No	Mobile	0.5	Yes	No	0	Always	No	Yes	No	No	OM	Geology	S	50	80	20	15	Yes	Above-7	M	BB	Low	Yes	Yes	68	26.5752	50.3804	972.415	71.5467	658.12
Female	22	Non Government	No	Yes	Mid	Mobile Data	4G	2024-01-03	No	Mobile	0.5	No	No	2	Always	Yes	No	No	Yes	SA	Physics	F	10	15	10	21	No	Above-7	L	AA	Moderate	Yes	Yes	54	25.9224	51.83	226.291	76.7857	491.466
Female	21	Non Government	No	Yes	Poor	Mobile Data	3G	2024-01-03	No	Mobile	0.5	Yes	No	0	Always	Yes	Yes	No	No	JO	Materials Science	S	30	10	20	5	No	Above-7	L	BA	Low	Yes	Yes	71	21.3592	44.377	628.63	44.3422	646.616
Female	19	Non Government	No	No	Mid	Mobile Data	3G	2024-03-06	Yes	Mobile	0.5	No	No	2	Always	Yes	No	Yes	No	JO	Materials Science	F	24	35	18	31	No	Under-7	M	BA	Low	Yes	Yes	62	29.4584	33.259	280.877	45.4181	873.839
Male	23	Government	Yes	No	Mid	Mobile Data	3G	2024-01-03	No	Mobile	0.75	No	No	12	Always	Yes	Yes	No	No	SA	Biology	S	27	20	33	35	No	Under-7	M	AA	Moderate	Yes	Yes	58	26.8548	37.7336	811.067	48.4272	933.773
Female	20	Non Government	No	Yes	Poor	Mobile Data	4G	2024-01-03	No	Mobile	0.75	Yes	No	12	Always	Yes	Yes	Yes	Yes	JO	Chemistry	F	10	15	10	21	No	Above-7	L	BA	Moderate	Yes	Yes	57	24.6522	68.0298	805.333	65.8811	821.546
Male	21	Government	No	Yes	Mid	Wifi	4G	2024-01-03	No	Mobile	0.5	Yes	Yes	2	Sometimes	No	No	Yes	Yes	OM	Computer Science	S	30	10	20	5	No	Above-7	L	AA	Moderate	Yes	Yes	57	25.3406	46.348	201.346	40.309	435.947
Male	21	Non Government	No	No	Mid	Mobile Data	4G	2024-01-03	No	Mobile	1	No	No	0	Always	Yes	No	Yes	Yes	UAE	Mathematics	F	80	77	63	83	Yes	Under-7	M	BA	Moderate	Yes	Yes	68	23.0352	48.6673	920.858	36.2546	802.246
Female	20	Government	No	No	Mid	Mobile Data	3G	0	No	Mobile	0.5	No	No	0	Always	No	Yes	Yes	Yes	SA	Mathematics	S	75	85	73	80	Yes	Under-7	M	AA	Low	Yes	Yes	65	20.9728	32.1084	275.167	70.7318	544.591
Female	24	Non Government	No	Yes	Mid	Mobile Data	3G	2024-01-03	No	Mobile	0.5	No	No	2	Always	Yes	No	Yes	Yes	OM	Engineering	F	40	7	50	41	No	Above-7	L	AA	Moderate	Yes	Yes	78	22.2717	31.5026	651.68	76.7459	589.151
Male	19	Government	Yes	Yes	Mid	Wifi	3G	2024-01-03	No	Mobile	0.5	Yes	No	2	Always	No	Yes	No	Yes	UAE	Geology	S	35	2	29	33	No	Above-7	L	AA	Low	Yes	Yes	74	27.0942	58.6873	987.07	60.0558	517.524
Female	20	Non Government	No	Yes	Poor	Wifi	4G	2024-03-06	No	Mobile	0.5	No	Yes	0	Never	No	Yes	No	Yes	SA	Engineering	F	10	90	30	21	No	Under-7	M	AA	Low	Yes	Yes	66	18.1727	51.5238	894.157	51.83	865.453
Female	24	Non Government	Yes	No	Mid	Mobile Data	3G	2024-01-03	Yes	Mobile	0.5	No	No	0	Always	Yes	No	Yes	No	OM	Chemistry	S	25	80	29	23	No	Under-7	M	CB	Moderate	Yes	Yes	65	19.3929	50.3482	960.908	55.9226	789.161
Female	20	Non Government	No	Yes	Mid	Wifi	4G	2024-03-06	No	Mobile	0.5	No	No	0	Always	Yes	Yes	Yes	Yes	KW	English	F	10	8	9	3	No	Above-7	L	AA	Moderate	Yes	Yes	58	18.552	39.725	408.339	53.3045	767.101
Male	18	Non Government	Yes	Yes	Mid	Wifi	4G	2024-01-03	Yes	Mobile	0.5	No	No	8	Always	Yes	No	Yes	No	KW	Environmental Science	S	15	7	12	7	No	Above-7	L	BB	Moderate	Yes	Yes	65	18.4887	59.79	195.018	87.5991	800.784
Male	18	Non Government	No	Yes	Mid	Mobile Data	4G	2024-01-03	No	Mobile	0.5	No	No	0	Always	Yes	Yes	No	No	JO	English	F	70	90	20	21	No	Under-7	M	CC	Low	Yes	Yes	67	28.2655	36.7295	269.512	76.0854	542.063
Male	24	Government	No	Yes	Mid	Wifi	4G	2024-01-03	No	Mobile	0.5	No	No	0	Always	No	Yes	Yes	Yes	LEB	Biology	S	75	80	15	20	No	Under-7	M	BB	Low	Yes	Yes	64	26.4439	37.5974	550.445	42.4852	666.787
Male	18	Non Government	No	Yes	Mid	Mobile Data	4G	2024-01-03	No	Mobile	0.5	No	Yes	0	Always	No	No	Yes	No	JO	Computer Science	F	78	98	10	11	No	Under-7	M	AA	Moderate	Yes	Yes	74	23.6901	48.4285	813.907	53.0513	779.952
Female	18	Government	No	No	Poor	Mobile Data	4G	0	No	Mobile	0.75	No	No	2	Never	Yes	No	Yes	Yes	UAE	Statistics	S	79	89	11	14	No	Under-7	M	BA	Low	Yes	Yes	92	19.174	41.4512	235.138	62.6407	781.956
Female	19	Non Government	No	Yes	Mid	Mobile Data	4G	2024-01-03	No	Mobile	0.5	No	No	2	Sometimes	Yes	Yes	Yes	Yes	SA	English	F	16	90	15	11	No	Under-7	M	AA	Moderate	Yes	Yes	62	23.8994	39.8985	693.758	66.7792	875.111
Female	19	Government	Yes	Yes	Mid	Mobile Data	4G	2024-01-03	No	Mobile	0.5	Yes	Yes	0	Always	Yes	Yes	No	No	UAE	Astronomy	S	17	80	13	10	No	Under-7	M	CB	Moderate	Yes	Yes	75	23.6817	55.8095	391.22	58.091	572.262
Female	20	Non Government	No	Yes	Mid	Mobile Data	4G	2024-01-03	No	Mobile	0.5	Yes	No	2	Always	Yes	Yes	Yes	No	LEB	English	F	40	87	50	41	No	Under-7	M	AA	Moderate	Yes	Yes	71	20.0784	56.0389	407.082	78.6076	862.202
Male	23	Government	No	Yes	Mid	Wifi	4G	2024-01-03	No	Mobile	0.5	No	Yes	2	Always	Yes	Yes	Yes	No	UAE	Biology	S	35	92	29	33	No	Under-7	M	CC	Moderate	Yes	Yes	74	23.2062	62.9807	695.726	76.0564	664.111
Female	20	Non Government	Yes	Yes	Mid	Wifi	3G	2024-03-06	Yes	Computer	0.5	No	No	12	Never	No	Yes	No	Yes	JO	Environmental Science	F	14	97	15	14	No	Under-7	H	BB	Low	Yes	Yes	68	22.7821	46.7083	520.299	60.3095	802.104
Male	23	Non Government	Yes	No	Poor	Mobile Data	3G	2024-01-03	Yes	Mobile	0.5	Yes	No	8	Always	No	Yes	Yes	No	JO	Biology	F	13	82	20	30	No	Under-7	H	BB	Moderate	Yes	Yes	59	25.3902	32.9234	830.83	81.2658	673.432
Female	21	Government	No	Yes	Mid	Mobile Data	4G	0	No	Mobile	0.5	No	Yes	0	Always	Yes	Yes	Yes	No	KW	Geology	S	24	97	15	14	No	Under-7	H	CC	Low	Yes	Yes	85	25.6211	40.9467	240.327	75.0654	969.166
Male	18	Non Government	No	Yes	Rich	Wifi	4G	2024-01-03	No	Mobile	0.5	Yes	Yes	0	Always	Yes	Yes	No	No	JO	Computer Science	S	23	82	20	30	No	Under-7	H	CB	Moderate	Yes	Yes	72	18.5436	69.2002	810.953	76.7149	507.581
Male	23	Non Government	No	Yes	Poor	Mobile Data	3G	2024-01-03	No	Mobile	0.5	No	No	12	Always	Yes	Yes	Yes	No	JO	Physics	F	20	3	9	3	No	Above-7	L	BB	Low	Yes	Yes	74	22.4954	53.8503	157.812	87.384	805.003
Male	24	Non Government	No	Yes	Poor	Mobile Data	4G	2024-03-06	No	Mobile	0.5	No	Yes	0	Always	Yes	Yes	No	No	JO	Biology	S	15	4	12	7	No	Above-7	L	CC	Moderate	Yes	Yes	80	25.5103	58.3895	274.648	45.988	745.921
Female	24	Non Government	No	Yes	Poor	Mobile Data	4G	2024-01-03	No	Mobile	0.5	No	No	12	Sometimes	Yes	6	Yes	No	JO	Chemistry	F	5	13	6	6	No	Above-7	L	BA	Moderate	Yes	Yes	64	24.0376	30.2943	690.535	46.0589	503.639
Female	23	Government	No	No	Poor	Mobile Data	4G	0	No	Mobile	0.5	No	Yes	2	Always	No	Yes	Yes	No	LEB	Materials Science	S	7	9	11	10	No	Above-7	L	CC	Low	Yes	Yes	76	28.2779	50.7282	869.433	83.3371	439.604
Female	23	Non Government	No	Yes	Mid	Wifi	4G	2024-03-06	No	Mobile	0.5	No	No	0	Never	No	No	Yes	Yes	SA	Geology	F	10	94	40	11	Yes	Under-7	M	BB	Moderate	Yes	Yes	66	25.9043	31.5011	327.412	76.3336	879.487
Male	24	Non Government	No	Yes	Mid	Wifi	4G	2024-03-06	Yes	Computer	0.75	No	No	2	Always	Yes	Yes	Yes	No	UAE	Statistics	S	25	89	21	13	Yes	Under-7	M	CC	Moderate	Yes	Yes	85	19.9552	52.7692	394.472	85.5927	494.471
Male	19	Non Government	No	Yes	Mid	Mobile Data	4G	2024-01-03	No	Mobile	1	No	No	0	Always	Yes	No	No	Yes	OM	Environmental Science	F	30	98	42	21	Yes	Under-7	H	BB	Moderate	Yes	Yes	56	18.8468	66.8308	583.409	33.7878	511.904
Male	21	Government	Yes	No	Rich	Wifi	4G	0	No	Mobile	0.5	No	No	12	Always	Yes	No	No	No	JO	Statistics	S	35	97	41	23	Yes	Under-7	H	BA	Low	Yes	Yes	68	25.709	68.7368	290.416	67.6654	987.061
Male	18	Government	Yes	Yes	Mid	Mobile Data	4G	2024-01-03	No	Mobile	0.5	No	No	0	Always	Yes	No	No	No	OM	English	F	32	88	32	25	Yes	Under-7	M	CC	Moderate	Yes	Yes	68	18.3181	51.6221	830.041	38.6777	830.357
Female	20	Non Government	No	Yes	Mid	Mobile Data	3G	2024-01-03	No	Mobile	0.5	Yes	Yes	12	Always	No	No	No	No	LEB	Geology	S	25	87	21	27	Yes	Under-7	M	AA	Moderate	Yes	Yes	77	25.0293	48.3282	796.273	60.2338	550.292
Female	21	Non Government	No	Yes	Mid	Mobile Data	3G	2024-01-03	No	Mobile	0.75	Yes	No	0	Always	Yes	No	Yes	No	LEB	Biology	F	72	98	52	15	Yes	Under-7	H	CC	Moderate	Yes	Yes	71	29.2828	67.8007	230.763	39.3448	754.569
Male	21	Non Government	No	Yes	Mid	Mobile Data	4G	2024-01-03	No	Mobile	0.75	No	No	0	Always	Yes	No	No	Yes	UAE	Computer Science	S	75	90	51	17	Yes	Under-7	H	CC	Moderate	Yes	Yes	68	24.9057	56.9444	517.447	37.6847	720.467
Male	24	Non Government	No	Yes	Mid	Mobile Data	3G	2024-01-03	No	Mobile	0.75	No	Yes	0	Always	Yes	Yes	Yes	Yes	UAE	Physics	F	20	88	31	28	Yes	Above-7	M	DD	Moderate	Yes	Yes	78	22.658	32.596	797.345	30.7301	906.684
Female	20	Non Government	No	Yes	Poor	Mobile Data	3G	2024-01-03	No	Mobile	0.75	No	No	0	Always	No	Yes	Yes	No	OM	Chemistry	S	10	98	41	38	Yes	Above-7	M	DC	High	Yes	Yes	80	25.7195	48.629	403.597	67.8143	837.592
Male	20	Non Government	Yes	Yes	Mid	Wifi	4G	2024-03-06	No	Computer	0.5	No	Yes	0	Always	No	Yes	Yes	Yes	SA	Environmental Science	F	90	98	41	38	Yes	Under-7	H	DC	Low	Yes	Yes	75	23.499	39.6098	669.796	51.5414	899.033
Male	22	Non Government	No	Yes	Mid	Mobile Data	4G	2024-01-03	No	Mobile	0.75	No	No	0	Always	No	Yes	Yes	No	KW	Geology	S	80	88	51	39	Yes	Under-7	H	DC	Moderate	Yes	Yes	65	24.5474	48.7922	145.192	36.3113	526.904
Male	21	Non Government	Yes	Yes	Poor	Mobile Data	3G	2024-01-03	Yes	Mobile	0.75	No	No	0	Always	Yes	No	No	No	SA	Geology	F	80	95	21	28	Yes	Under-7	H	DD	Low	Yes	Yes	53	29.2976	48.2186	647.82	49.3703	784.132
Male	21	Non Government	No	Yes	Rich	Wifi	4G	2024-03-06	No	Computer	0.75	No	Yes	0	Always	No	Yes	No	No	JO	Astronomy	S	78	70	31	29	Yes	Under-7	H	DD	High	Yes	Yes	70	22.6332	53.2858	237.388	40.1366	424.145
Female	19	Government	No	Yes	Mid	Mobile Data	3G	2024-01-03	No	Mobile	0.25	No	Yes	2	Always	Yes	Yes	No	No	SA	Chemistry	F	10	18	71	38	Yes	Above-7	M	CB	Low	Yes	Yes	73	29.5343	44.2708	847.525	86.5017	441.364
Female	18	Non Government	No	Yes	Mid	Mobile Data	3G	2024-01-03	No	Mobile	0.25	No	No	2	Sometimes	No	6	No	Yes	KW	Environmental Science	S	10	58	51	48	Yes	Above-7	M	DD	Moderate	Yes	Yes	90	28.8642	36.5708	419.905	49.2003	828.116
Female	18	Government	No	Yes	Mid	Wifi	3G	2024-01-03	No	Mobile	0.75	Yes	Yes	0	Always	Yes	Yes	Yes	No	SA	Physics	F	98	88	60	31	No	Under-7	H	CB	Moderate	Yes	Yes	59	20.3495	50.1488	353.398	50.0372	414.652
Female	24	Non Government	No	Yes	Mid	Wifi	4G	2024-01-03	No	Mobile	0.75	No	No	0	Always	Yes	Yes	Yes	No	KW	Astronomy	S	75	81	51	34	No	Under-7	H	BB	Low	Yes	Yes	77	18.8323	63.2081	856.8	80.3915	747.859
Male	20	Government	No	Yes	Mid	Wifi	4G	2024-01-03	No	Mobile	0.5	Yes	No	0	Sometimes	Yes	Yes	Yes	Yes	KW	Chemistry	F	10	17	50	21	No	Under-7	M	CB	Moderate	Yes	Yes	75	19.2093	56.5605	145.13	68.8653	904.243
Male	21	Non Government	Yes	Yes	Mid	Mobile Data	3G	2024-03-06	Yes	Mobile	0.5	Yes	No	0	Always	No	Yes	No	No	LEB	Statistics	S	35	2	29	23	No	Under-7	M	BB	Moderate	Yes	Yes	71	18.2187	43.5347	456.948	72.6103	627.965
Female	19	Government	No	Yes	Mid	Wifi	4G	2024-01-03	Yes	Mobile	0.75	Yes	No	2	Always	Yes	No	Yes	No	JO	Computer Science	F	10	20	22	97	No	Above-7	L	DD	Low	Yes	Yes	55	19.1333	67.4209	433.003	68.1601	426.904
Male	18	Non Government	Yes	Yes	Mid	Wifi	3G	2024-01-03	Yes	Mobile	0.5	No	No	12	Always	Yes	Yes	No	Yes	OM	Materials Science	S	5	9	19	98	No	Above-7	L	DD	Moderate	Yes	Yes	78	26.1961	66.4883	356.32	86.7718	828.308
Male	19	Government	Yes	Yes	Mid	Mobile Data	4G	2024-01-03	No	Mobile	0.5	Yes	No	12	Always	No	Yes	No	No	OM	Computer Science	F	10	10	40	51	No	Above-7	L	DD	Moderate	Yes	Yes	69	18.8543	38.3739	920.579	42.42	957.812
Female	21	Government	No	No	Mid	Mobile Data	3G	0	No	Mobile	1	No	No	2	Always	Yes	Yes	Yes	No	JO	Computer Science	S	35	2	29	23	No	Above-7	L	CB	Low	Yes	Yes	59	21.8277	31.5767	775.836	89.3424	830.303
Female	19	Non Government	No	No	Mid	Mobile Data	3G	0	No	Mobile	0.75	No	No	0	Never	No	No	Yes	Yes	UAE	Physics	F	20	90	50	61	Yes	Above-7	M	CC	Low	Yes	Yes	64	28.1385	59.6523	157.531	79.8574	747.068
Male	18	Government	Yes	Yes	Mid	Mobile Data	3G	2024-01-03	Yes	Mobile	0.5	No	Yes	2	Always	Yes	No	No	Yes	SA	Engineering	S	32	82	59	63	Yes	Above-7	M	DC	Moderate	Yes	Yes	60	18.2793	63.1044	743.219	65.3384	538.017
Female	20	Non Government	No	Yes	Poor	Mobile Data	4G	2024-01-03	No	Mobile	0.75	No	Yes	0	Always	Yes	Yes	No	Yes	KW	Mathematics	F	10	30	50	91	Yes	Above-7	L	DC	Moderate	Yes	Yes	68	27.7736	68.7146	574.569	69.7423	409.225
Female	18	Government	No	Yes	Mid	Wifi	4G	2024-01-03	No	Mobile	0.5	No	No	0	Always	Yes	No	No	No	JO	Materials Science	S	12	22	59	83	Yes	Above-7	L	DC	Low	Yes	Yes	78	21.3823	65.5935	910.781	68.9296	816.803
Male	21	Non Government	No	Yes	Mid	Wifi	4G	0	No	Mobile	0.5	No	Yes	0	Sometimes	No	No	Yes	Yes	UAE	Chemistry	F	11	20	20	98	No	Above-7	L	DC	Low	Yes	Yes	92	19.418	54.0214	381.651	33.5038	538.616
Male	18	Government	No	No	Mid	Mobile Data	4G	0	No	Mobile	1	Yes	Yes	0	Always	No	Yes	Yes	No	KW	Materials Science	S	10	12	29	93	No	Above-7	L	DC	Moderate	Yes	Yes	85	26.3608	51.2021	616.746	43.081	914.898
Male	23	Non Government	No	Yes	Mid	Mobile Data	3G	2024-01-03	No	Mobile	0.5	No	No	0	Always	Yes	No	No	No	UAE	Biology	F	69	82	20	28	Yes	Under-7	H	DD	Low	Yes	Yes	69	25.5473	31.1136	550.68	87.6883	679.818
Male	22	Non Government	Yes	No	Mid	Wifi	4G	2024-03-06	Yes	Computer	None	Yes	No	0	Always	No	Yes	No	No	UAE	Physics	S	70	83	29	33	Yes	Under-7	H	CB	Moderate	Yes	Yes	68	28.5297	39.8663	540.605	62.0619	718.381
Male	24	Government	No	Yes	Mid	Wifi	3G	2024-01-03	Yes	Mobile	0.5	No	No	0	Always	Yes	No	No	No	KW	Mathematics	F	89	92	40	28	Yes	Under-7	H	DC	Moderate	Yes	Yes	63	26.8209	48.3846	510.495	52.7012	852.362
Male	22	Government	Yes	No	Mid	Mobile Data	3G	2024-01-03	No	Mobile	1	Yes	Yes	0	Sometimes	No	No	No	Yes	SA	Computer Science	S	79	93	49	23	Yes	Under-7	H	CC	Moderate	Yes	Yes	68	27.6418	55.1402	285.067	75.7223	867.658
Male	20	Non Government	No	Yes	Mid	Mobile Data	3G	2024-01-03	No	Mobile	0.75	No	Yes	0	Sometimes	No	No	No	No	KW	Neuroscience	F	15	90	21	97	Yes	Under-7	M	DD	Moderate	Yes	Yes	80	21.3844	52.2901	780.139	61.4711	785.59
Male	20	Non Government	No	Yes	Mid	Wifi	4G	2024-01-03	No	Mobile	0.75	Yes	No	0	Always	No	No	Yes	No	JO	Environmental Science	S	20	77	31	88	Yes	Under-7	M	DC	Moderate	Yes	Yes	74	20.1293	59.7054	506.202	30.7898	963.059
Male	21	Non Government	Yes	Yes	Poor	Mobile Data	3G	2024-01-03	Yes	Computer	0.75	No	Yes	0	Never	No	No	No	Yes	SA	Astronomy	F	4	10	11	7	No	Above-7	L	DD	Moderate	Yes	Yes	67	27.0074	41.1907	962.665	74.1743	989.379
Female	19	Government	No	No	Mid	Mobile Data	3G	0	No	Mobile	0.5	No	No	0	Never	No	No	No	Yes	LEB	English	S	5	0	1	8	No	Above-7	L	DD	Low	Yes	Yes	67	27.682	52.5981	334.728	73.9331	968.131
Female	24	Non Government	No	Yes	Mid	Wifi	4G	2024-03-06	No	Mobile	0.75	No	No	0	Sometimes	No	Yes	Yes	Yes	LEB	Computer Science	F	88	81	50	10	Yes	Above-7	M	DC	High	Yes	Yes	53	29.8861	33.5257	714.469	39.9089	894.508
Female	24	Non Government	No	Yes	Mid	Mobile Data	4G	2024-01-03	No	Mobile	0.75	No	No	2	Always	No	No	Yes	Yes	KW	Environmental Science	S	90	88	54	12	Yes	Above-7	M	DD	Moderate	Yes	Yes	64	22.9514	46.5466	946.645	87.3996	823.375
Female	24	Non Government	No	No	Mid	Wifi	4G	2024-01-03	No	Mobile	0.5	No	No	0	Always	No	No	Yes	Yes	UAE	Chemistry	F	86	98	50	20	Yes	Under-7	H	DD	Low	Yes	Yes	60	22.4642	60.0064	697.112	43.4345	797.996
Female	23	Government	No	No	Poor	Mobile Data	4G	2024-01-03	No	Mobile	0.75	No	No	12	Always	No	Yes	Yes	No	UAE	Biology	S	90	90	57	22	Yes	Under-7	H	DD	Low	Yes	Yes	73	27.317	57.736	884.146	57.465	462.25
Female	19	Non Government	No	Yes	Mid	Wifi	4G	2024-01-03	No	Computer	0.5	No	No	0	Sometimes	No	Yes	No	Yes	LEB	Physics	F	78	91	50	40	Yes	Under-7	H	BB	Low	Yes	Yes	72	22.0896	69.6257	844.733	36.8842	562.891
Male	22	Government	Yes	Yes	Mid	Mobile Data	3G	2024-01-03	No	Mobile	0.75	Yes	Yes	0	Always	Yes	No	No	No	SA	Environmental Science	S	70	98	54	72	Yes	Under-7	H	DD	Low	Yes	Yes	92	29.1691	41.1156	424.106	66.1969	403.413
Female	21	Non Government	No	No	Mid	Wifi	4G	0	No	Mobile	0.75	No	Yes	0	Always	No	No	No	Yes	OM	Biology	F	80	80	46	61	Yes	Under-7	M	DD	Low	Yes	Yes	64	28.301	49.9276	640.112	52.5271	482.446
Male	19	Non Government	Yes	Yes	Rich	Wifi	4G	2024-03-06	No	Mobile	0.75	Yes	Yes	0	Always	No	Yes	Yes	No	OM	Biology	S	85	82	59	63	Yes	Under-7	M	DC	Low	Yes	Yes	65	23.1479	43.1812	240.635	51.1904	663.538
Male	20	Non Government	Yes	Yes	Poor	Wifi	4G	2024-01-03	Yes	Computer	1	No	Yes	2	Sometimes	Yes	Yes	No	Yes	JO	Biology	F	88	90	86	81	Yes	Under-7	H	DC	High	Yes	Yes	72	27.0105	47.6241	581.973	79.6186	487.922
Female	24	Government	No	Yes	Mid	Wifi	4G	0	No	Mobile	0.5	No	Yes	0	Sometimes	No	Yes	No	Yes	KW	Statistics	S	89	92	89	83	Yes	Under-7	H	DD	Low	Yes	Yes	74	27.0545	64.278	307.38	30.5737	940.998
Male	21	Government	No	Yes	Mid	Wifi	4G	2024-01-03	No	Mobile	0.5	No	No	2	Never	No	Yes	No	Yes	OM	Engineering	F	39	71	40	26	No	Above-7	M	BA	Moderate	Yes	Yes	64	19.2375	57.3684	769.363	77.8768	883.42
Male	23	Government	No	Yes	Mid	Wifi	3G	2024-01-03	Yes	Mobile	1	No	Yes	0	Always	No	No	Yes	Yes	UAE	Physics	S	35	80	34	22	No	Above-7	M	BA	Moderate	Yes	Yes	54	28.8306	65.2976	575.253	64.2869	442.967
Male	24	Government	Yes	Yes	Mid	Wifi	4G	0	No	Computer	0.5	Yes	No	0	3	No	Yes	Yes	Yes	JO	Geology	F	76	81	80	86	No	Under-7	H	BA	Low	Yes	Yes	72	24.063	38.1404	470.105	89.1659	549.348
Male	19	Government	No	Yes	Mid	Wifi	4G	2024-01-03	No	Mobile	0.5	No	No	0	Never	No	Yes	No	Yes	OM	Materials Science	S	65	89	64	82	No	Under-7	H	AA	Moderate	Yes	Yes	54	27.9175	64.9344	341.917	65.3666	891.443
Male	24	Non Government	No	Yes	Mid	Mobile Data	4G	2024-01-03	No	Mobile	1	Yes	Yes	8	Always	Yes	Yes	Yes	Yes	LEB	Mathematics	F	96	95	70	70	Yes	Under-7	H	BA	Low	Yes	Yes	58	21.8406	32.3905	998.829	33.3227	881.828
Female	19	Government	No	No	Poor	Mobile Data	4G	2024-01-03	No	Mobile	1	Yes	No	0	Always	Yes	Yes	Yes	Yes	UAE	Statistics	S	80	91	87	72	Yes	Under-7	H	AA	Low	Yes	Yes	65	28.7463	65.544	164.539	33.0387	967.27
Male	18	Non Government	Yes	Yes	Mid	Wifi	4G	2024-01-03	Yes	Computer	1	No	No	0	Always	Yes	Yes	Yes	No	OM	Geology	F	2	9	10	1	No	Above-7	L	AA	High	Yes	Yes	48	22.6704	43.163	139.205	82.9892	998.529
Female	20	Non Government	No	Yes	Poor	Mobile Data	4G	2024-01-03	No	Mobile	0.5	No	Yes	0	Always	No	Yes	No	Yes	OM	Physics	S	3	8	19	3	No	Above-7	L	AA	Moderate	Yes	Yes	61	18.1301	42.5835	295.532	80.4728	985.762
Male	20	Non Government	No	Yes	Mid	Mobile Data	4G	2024-01-03	No	Mobile	1	No	Yes	0	Never	No	Yes	No	No	SA	Computer Science	F	50	79	10	31	No	Under-7	M	AA	Moderate	Yes	Yes	73	28.8646	50.4835	973.965	50.7534	646.083
Male	23	Government	Yes	Yes	Rich	Wifi	4G	2024-01-03	No	Mobile	0.75	No	Yes	0	Always	No	No	Yes	Yes	OM	Geology	S	53	88	9	33	No	Under-7	M	BA	High	Yes	Yes	54	19.0954	67.6276	981.314	67.0819	550.197
Male	21	Non Government	Yes	Yes	Rich	Wifi	4G	2024-01-03	Yes	Computer	0.5	Yes	Yes	2	Sometimes	No	No	Yes	Yes	KW	Materials Science	F	70	89	12	21	No	Under-7	H	AA	High	Yes	Yes	61	21.8318	31.9113	689.435	59.3755	855.046
Male	22	Non Government	Yes	Yes	Poor	Wifi	4G	2024-01-03	Yes	Computer	0.5	Yes	Yes	0	Sometimes	Yes	Yes	Yes	No	LEB	Physics	S	59	90	19	43	No	Under-7	H	Fail	High	No	No	94	29.4007	44.0892	892.096	88.0298	579.564
Male	19	Non Government	No	Yes	Mid	Wifi	4G	2024-03-06	No	Tab	1	No	Yes	0	Always	Yes	No	Yes	Yes	OM	Neuroscience	F	78	80	66	51	Yes	Under-7	M	BA	Moderate	Yes	Yes	74	29.4073	64.2629	292.566	86.9977	883.84
Female	24	Non Government	No	No	Mid	Wifi	4G	2024-01-03	No	Mobile	0.5	No	No	12	Always	Yes	No	No	No	OM	English	S	79	72	79	83	Yes	Under-7	M	AA	Low	Yes	Yes	82	24.8813	45.8422	974.838	89.0303	720.373
Female	23	Non Government	No	Yes	Mid	Mobile Data	4G	2024-01-03	No	Mobile	0.75	Yes	Yes	0	Always	No	No	Yes	Yes	UAE	Geology	F	10	9	2	1	No	Above-7	L	BB	Moderate	Yes	Yes	95	25.582	37.9663	228.506	81.9869	876.356
Male	23	Government	Yes	Yes	Mid	Wifi	4G	0	No	Computer	1	Yes	Yes	0	Always	No	Yes	Yes	No	SA	English	S	9	7	9	3	No	Above-7	L	BA	Low	Yes	Yes	74	23.3813	46.9918	191.013	84.5731	565.528
Male	20	Government	No	No	Mid	Mobile Data	3G	2024-01-03	No	Mobile	0.75	Yes	Yes	12	Sometimes	No	Yes	6	Yes	JO	Geology	F	98	90	86	71	Yes	Under-7	H	BB	Low	Yes	Yes	75	21.5185	45.4221	200.99	43.0367	704.816
Male	20	Non Government	Yes	Yes	Mid	Wifi	3G	2024-01-03	Yes	Mobile	0.75	No	No	0	Never	No	No	No	Yes	SA	Computer Science	S	89	92	89	83	Yes	Under-7	H	AA	Moderate	Yes	Yes	58	21.944	66.6166	615.815	79.8604	738.414
Male	18	Government	No	Yes	Mid	Wifi	3G	2024-01-03	Yes	Computer	0.75	No	Yes	0	Never	No	No	No	Yes	SA	Biology	F	88	90	76	81	Yes	Under-7	H	Fail	Moderate	No	No	80	26.0702	60.4774	802.877	72.5314	965.865
Female	19	Government	No	Yes	Mid	Wifi	4G	2024-01-03	Yes	Mobile	0.5	Yes	Yes	0	Always	Yes	Yes	Yes	No	KW	Astronomy	S	99	96	89	84	Yes	Under-7	H	BB	Low	Yes	Yes	78	27.0285	50.2046	430	87.7672	559.959
Female	19	Non Government	No	Yes	Mid	Mobile Data	3G	2024-01-03	No	Mobile	0.5	Yes	Yes	0	Always	Yes	Yes	No	No	KW	Mathematics	F	82	89	22	31	Yes	Under-7	H	AA	Moderate	Yes	Yes	79	27.4989	69.5348	980.106	64.2757	962.013
Female	21	Non Government	No	Yes	Mid	Mobile Data	3G	2024-01-03	No	Mobile	1	No	Yes	0	Sometimes	No	Yes	Yes	Yes	JO	Materials Science	S	84	92	29	43	Yes	Under-7	H	CB	Moderate	Yes	Yes	69	27.4754	48.6111	490.978	35.11	882.915
Female	19	Non Government	No	Yes	Mid	Wifi	4G	2024-01-03	No	Computer	1	No	Yes	0	Always	No	Yes	No	No	SA	Chemistry	F	70	69	46	45	Yes	Above-7	M	BB	Moderate	Yes	Yes	68	19.0945	32.3295	235.404	65.8439	838.536
Female	22	Government	No	Yes	Mid	Mobile Data	3G	2024-01-03	No	Mobile	1	No	No	0	Always	Yes	Yes	Yes	Yes	SA	Mathematics	S	74	62	49	43	Yes	Above-7	M	BB	Low	Yes	Yes	43	23.933	40.491	519.37	71.1949	872.122
Male	18	Non Government	No	Yes	Mid	Wifi	4G	2024-01-03	No	Mobile	0.75	No	Yes	0	Sometimes	No	Yes	Yes	Yes	JO	Physics	F	90	79	76	79	Yes	Under-7	H	AA	Low	Yes	Yes	63	18.6907	47.4428	711.133	43.2193	763.255
Female	18	Government	No	No	Poor	Mobile Data	4G	0	No	Mobile	0.5	Yes	Yes	0	Never	No	No	Yes	Yes	SA	Engineering	S	84	77	79	68	Yes	Under-7	H	BA	Low	Yes	Yes	74	24.5943	36.2761	849.003	53.6468	546.448
Male	22	Non Government	Yes	Yes	Mid	Mobile Data	3G	2024-03-06	Yes	Mobile	0.5	Yes	Yes	0	Sometimes	No	No	Yes	No	SA	English	F	80	80	62	11	Yes	Above-7	M	Fail	Moderate	No	No	61	23.2984	67.9026	512.891	65.9102	513.697
Male	19	Non Government	Yes	Yes	Mid	Wifi	4G	2024-01-03	Yes	Computer	1	No	Yes	0	Always	Yes	No	No	Yes	KW	English	S	81	82	69	13	Yes	Above-7	M	BA	High	Yes	Yes	66	28.6525	60.674	634.246	52.4463	919.805
Male	21	Non Government	No	Yes	Mid	Wifi	4G	2024-01-03	No	Computer	0.75	Yes	Yes	12	Sometimes	No	No	Yes	Yes	OM	Mathematics	F	10	0	2	41	No	Above-7	L	Fail	Low	No	No	80	22.211	40.7315	340.61	52.4969	835.084
Male	18	Non Government	No	Yes	Poor	Mobile Data	3G	2024-01-03	No	Mobile	0.75	Yes	No	2	Sometimes	No	No	Yes	Yes	JO	Mathematics	S	11	2	9	49	No	Above-7	L	Fail	Low	No	No	67	19.4048	53.6322	681.325	37.9852	527.923
Male	18	Government	No	No	Poor	Mobile Data	4G	2024-03-06	No	Mobile	0.5	Yes	Yes	0	Always	No	Yes	No	Yes	JO	Astronomy	F	85	89	22	61	No	Under-7	H	CC	Moderate	Yes	Yes	71	19.7159	58.858	987.375	86.4448	769.056
Female	19	Government	Yes	Yes	Poor	Mobile Data	4G	0	No	Computer	0.75	No	No	0	Never	No	Yes	Yes	No	UAE	Neuroscience	S	80	89	23	68	No	Under-7	H	CC	Low	Yes	Yes	82	27.1381	67.6512	144.148	75.0297	668.528
Male	22	Non Government	No	Yes	Mid	Mobile Data	4G	2024-01-03	No	Mobile	0.75	No	No	0	Always	Yes	No	No	No	UAE	Biology	F	95	87	62	81	No	Under-7	M	AA	High	Yes	Yes	68	25.4186	65.2654	897.878	30.0746	495.193
Female	18	Government	No	Yes	Mid	Mobile Data	4G	2024-01-03	No	Mobile	0.75	Yes	Yes	12	Sometimes	No	Yes	No	Yes	LEB	Statistics	S	87	79	73	98	No	Under-7	M	CB	Low	Yes	Yes	58	19.2135	50.6077	606.054	75.9368	719.114
Female	24	Non Government	Yes	No	Mid	Mobile Data	3G	2024-01-03	Yes	Mobile	1	No	No	12	Always	Yes	No	Yes	No	UAE	Statistics	F	85	87	72	10	Yes	Above-7	M	BB	Moderate	Yes	Yes	88	19.0093	60.9861	326.889	74.3877	568.911
Female	19	Non Government	Yes	Yes	Mid	Wifi	4G	2024-01-03	No	Mobile	0.5	Yes	No	0	Always	Yes	Yes	No	No	OM	Chemistry	S	79	88	79	20	Yes	Above-7	M	AA	Low	Yes	Yes	78	26.4116	52.4858	959.401	30.5839	457.746
Female	20	Government	No	Yes	Mid	Mobile Data	4G	0	No	Mobile	0.5	Yes	No	0	Always	Yes	No	Yes	Yes	LEB	Neuroscience	F	80	81	71	30	Yes	Under-7	M	AA	Low	Yes	Yes	98	18.8732	52.1082	535.019	52.1763	680.175
Female	23	Non Government	No	Yes	Mid	Wifi	4G	2024-03-06	No	Tab	0.5	No	No	2	Never	No	No	No	Yes	LEB	Materials Science	S	70	83	70	23	Yes	Under-7	M	AA	Moderate	Yes	Yes	78	27.8623	34.5897	398.521	66.4049	754.065
Male	20	Non Government	No	Yes	Poor	Wifi	4G	2024-01-03	No	Mobile	0.5	Yes	No	2	Always	No	Yes	No	No	LEB	Geology	F	80	82	76	19	Yes	Under-7	M	AA	Low	Yes	Yes	78	26.4749	35.0455	263.348	57.165	428.144
Female	23	Non Government	No	Yes	Mid	Mobile Data	3G	2024-01-03	Yes	Mobile	0.5	No	No	12	Always	Yes	No	Yes	Yes	KW	Mathematics	S	70	82	75	29	Yes	Under-7	M	AA	Moderate	Yes	Yes	55	18.9762	51.1813	320.007	76.6792	641.256
Male	23	Non Government	Yes	Yes	Mid	Mobile Data	3G	2024-03-06	Yes	Mobile	0.5	No	No	2	Always	Yes	No	Yes	Yes	UAE	Neuroscience	F	89	87	86	15	Yes	Under-7	M	BA	Moderate	Yes	Yes	54	19.0181	40.7545	849.564	55.5275	554.597
Male	21	Non Government	No	Yes	Mid	Wifi	4G	2024-01-03	No	Mobile	0.75	No	No	0	Always	No	Yes	Yes	Yes	KW	Geology	S	90	86	85	10	Yes	Under-7	M	CC	Moderate	Yes	Yes	72	29.8397	30.8415	652.969	39.2318	418.39
Female	23	Government	No	Yes	Mid	Wifi	4G	2024-01-03	No	Mobile	0.5	Yes	Yes	2	Sometimes	No	Yes	Yes	Yes	LEB	Materials Science	F	69	77	76	75	Yes	Above-7	M	BA	Low	Yes	Yes	77	22.4912	58.9136	921.921	88.5849	475.398
Male	23	Non Government	No	Yes	Mid	Mobile Data	4G	2024-01-03	No	Mobile	0.5	No	Yes	0	Always	No	No	No	Yes	LEB	Chemistry	S	70	76	65	70	Yes	Above-7	M	CC	Moderate	Yes	Yes	95	22.4477	31.2995	308.772	44.5224	483.42
Male	24	Non Government	No	Yes	Poor	Mobile Data	3G	2024-01-03	No	Mobile	0.5	No	No	12	Never	No	Yes	No	No	OM	Computer Science	F	75	72	64	39	Yes	Above-7	L	Fail	Low	No	No	71	27.7536	53.8111	209.025	73.0615	509.725
Female	20	Government	No	Yes	Mid	Mobile Data	4G	2024-01-03	Yes	Mobile	0.5	No	No	12	Sometimes	No	No	No	Yes	LEB	Materials Science	S	72	76	66	40	Yes	Above-7	L	BA	Moderate	Yes	Yes	59	29.367	51.5678	105.479	38.5894	882.027
Male	21	Government	No	Yes	Mid	Mobile Data	4G	2024-01-03	No	Mobile	0.75	Yes	Yes	8	Sometimes	No	Yes	No	Yes	LEB	Statistics	F	77	82	74	79	Yes	Under-7	M	Fail	Low	No	No	74	29.832	68.7526	557.076	49.7408	663.695
Female	19	Non Government	No	Yes	Mid	Wifi	3G	2024-01-03	Yes	Mobile	0.75	No	No	0	Always	Yes	No	No	No	LEB	Chemistry	S	71	84	67	80	Yes	Under-7	M	Fail	High	No	No	68	27.0405	49.3685	998.476	56.5217	488.252
Male	21	Non Government	Yes	Yes	Rich	Wifi	4G	2024-03-06	No	Mobile	1	No	No	0	Always	Yes	No	No	Yes	SA	English	F	87	92	74	89	Yes	Under-7	H	AA	Low	Yes	Yes	51	22.5151	32.5441	725.469	41.5339	460.178
Female	24	Non Government	No	Yes	Mid	Mobile Data	3G	2024-01-03	No	Mobile	0.75	Yes	Yes	12	Never	No	No	Yes	Yes	LEB	Computer Science	S	81	84	77	85	Yes	Under-7	H	BA	Moderate	Yes	Yes	72	19.002	52.0675	377.555	56.9976	578.764
Female	20	Non Government	No	Yes	Poor	Mobile Data	4G	2024-03-06	No	Mobile	0.5	No	No	0	Always	No	Yes	No	Yes	LEB	Physics	F	15	97	22	10	Yes	Under-7	H	BA	Moderate	Yes	Yes	68	27.3258	63.6438	889.173	39.4298	878.809
Female	23	Non Government	Yes	Yes	Rich	Wifi	4G	2024-03-06	No	Computer	1	No	Yes	0	Always	Yes	No	No	No	OM	Biology	S	19	98	20	2	Yes	Under-7	H	AA	High	Yes	Yes	69	24.7009	69.874	803.55	63.5404	618.676
Male	22	Government	No	No	Mid	Mobile Data	4G	0	No	Mobile	0.5	No	No	0	Always	Yes	No	No	Yes	SA	Neuroscience	F	25	82	52	20	Yes	Above-7	M	BA	Low	Yes	Yes	62	23.0907	47.2137	113.874	69.8228	495.938
Female	20	Non Government	No	Yes	Poor	Mobile Data	3G	0	No	Mobile	0.75	No	No	12	Always	Yes	No	No	No	SA	Biology	S	29	78	40	12	Yes	Above-7	M	BA	Low	Yes	Yes	70	28.8763	42.8119	835.174	33.7461	642.47
Male	21	Government	No	No	Poor	Mobile Data	4G	2024-03-06	No	Mobile	0.5	No	No	2	Sometimes	No	No	Yes	No	JO	Engineering	F	45	87	57	80	Yes	Under-7	M	BB	Moderate	Yes	Yes	60	19.3344	66.2661	370.474	82.2679	733.187
Female	18	Government	No	Yes	Poor	Mobile Data	4G	0	No	Mobile	1	Yes	No	0	Never	No	No	Yes	No	KW	Materials Science	S	39	88	43	72	Yes	Under-7	M	AA	Low	Yes	Yes	68	23.9115	37.6497	234.706	41.1085	417.751
Male	23	Non Government	No	Yes	Mid	Mobile Data	4G	2024-01-03	No	Mobile	1	No	No	0	Never	No	No	No	No	UAE	Statistics	F	85	90	52	30	Yes	Under-7	H	AA	Moderate	Yes	Yes	72	18.1362	54.6172	303.698	43.5217	776.585
Male	21	Non Government	Yes	Yes	Mid	Wifi	4G	2024-01-03	No	Mobile	0.5	Yes	No	0	Always	Yes	Yes	Yes	No	SA	Geology	S	79	91	49	22	Yes	Under-7	H	BB	Low	Yes	Yes	69	23.6239	46.2286	521.722	69.681	637.06
Male	24	Government	No	No	Poor	Mobile Data	3G	2024-01-03	No	Mobile	0.25	Yes	Yes	12	Always	Yes	Yes	No	No	LEB	English	F	90	91	80	81	Yes	Under-7	H	AA	Low	Yes	Yes	72	18.6756	31.6433	482.381	58.1251	405.836
Male	22	Non Government	Yes	Yes	Poor	Wifi	3G	2024-03-06	No	Computer	0.5	No	No	2	Always	Yes	No	Yes	No	KW	Neuroscience	S	80	90	80	83	Yes	Under-7	H	BA	Moderate	Yes	Yes	74	19.4258	43.8915	359.999	59.9637	804.334
Male	20	Non Government	No	Yes	Mid	Mobile Data	4G	2024-01-03	No	Mobile	0.5	No	No	0	Always	No	Yes	No	No	UAE	Engineering	F	80	83	82	71	Yes	Above-7	M	BB	Moderate	Yes	Yes	61	19.4103	40.6091	254.996	37.6893	827.433
Male	21	Non Government	No	Yes	Poor	Mobile Data	4G	2024-01-03	Yes	Mobile	0.5	No	Yes	0	Always	Yes	Yes	No	No	UAE	Chemistry	S	71	81	83	72	Yes	Above-7	M	AA	High	Yes	Yes	77	25.7905	57.4436	786.008	78.3441	777.304
Male	22	Non Government	Yes	No	Mid	Mobile Data	3G	2024-03-06	Yes	Mobile	0.5	Yes	No	0	Always	Yes	Yes	Yes	No	UAE	Chemistry	F	72	87	72	89	Yes	Above-7	M	AA	High	Yes	Yes	68	26.9525	67.9516	991.099	67.0233	605.158
Male	19	Non Government	No	Yes	Poor	Mobile Data	4G	2024-01-03	Yes	Mobile	0.5	No	No	0	Never	No	No	No	No	UAE	Engineering	S	69	77	83	92	Yes	Above-7	M	BB	High	Yes	Yes	67	25.0004	40.7219	800.012	38.1229	717.763
Female	18	Non Government	No	Yes	Rich	Wifi	3G	2024-01-03	No	Mobile	0.75	No	No	0	Never	No	No	Yes	Yes	UAE	English	F	85	99	42	90	Yes	Under-7	H	CC	High	Yes	Yes	51	29.5461	62.4586	366.343	52.44	632.295
Male	21	Non Government	Yes	No	Mid	Mobile Data	3G	2024-01-03	Yes	Computer	1	Yes	Yes	0	Always	No	Yes	Yes	No	JO	Computer Science	S	89	96	45	92	Yes	Under-7	H	CC	Moderate	Yes	Yes	67	22.4984	32.2144	320.328	78.6246	820.373
Male	19	Government	No	No	Poor	Mobile Data	3G	2024-01-03	Yes	Mobile	0.5	Yes	No	0	Always	No	Yes	No	No	SA	Astronomy	F	80	82	64	58	Yes	Under-7	H	BB	Low	Yes	Yes	69	21.4285	51.5248	295.899	64.1013	750.148
Male	23	Government	No	No	Poor	Mobile Data	3G	0	No	Mobile	0.5	No	No	2	Always	Yes	No	No	Yes	JO	Environmental Science	S	87	93	63	60	Yes	Under-7	H	AA	Low	Yes	Yes	60	28.4232	32.822	223.026	36.5189	449.079
Female	24	Government	No	Yes	Mid	Wifi	4G	2024-01-03	No	Mobile	0.5	Yes	No	0	Always	Yes	Yes	No	No	JO	Neuroscience	F	15	9	14	80	No	Above-7	L	BA	Moderate	Yes	Yes	67	20.6832	67.3613	596.197	52.3666	785.856
Male	21	Non Government	Yes	Yes	Mid	Wifi	3G	2024-01-03	Yes	Mobile	0.5	No	No	2	Always	Yes	No	Yes	No	SA	Astronomy	S	9	6	15	85	No	Above-7	L	BA	Low	Yes	Yes	67	29.5587	60.6541	644.86	44.5617	812.343
Male	20	Non Government	Yes	No	Poor	Mobile Data	3G	2024-01-03	Yes	Mobile	0.75	No	No	12	Always	Yes	Yes	No	No	UAE	Neuroscience	F	81	86	86	41	Yes	Under-7	M	AA	Moderate	Yes	Yes	67	18.1459	56.318	734.952	61.0479	622.421
Male	18	Government	No	Yes	Mid	Mobile Data	3G	2024-01-03	Yes	Mobile	0.75	Yes	No	12	Always	Yes	Yes	Yes	Yes	UAE	Computer Science	S	78	82	78	53	Yes	Under-7	M	BA	Low	Yes	Yes	68	29.6385	62.9559	712.192	80.6017	925.471
Male	22	Government	No	No	Poor	Mobile Data	3G	0	No	Mobile	0.5	Yes	Yes	2	Sometimes	No	No	Yes	Yes	OM	Biology	F	80	87	74	68	Yes	Under-7	M	AA	Low	Yes	Yes	80	18.5179	55.9008	363.1	56.176	905.809
Male	23	Non Government	No	No	Mid	Wifi	4G	0	No	Mobile	1	No	No	0	Always	Yes	No	Yes	Yes	UAE	Computer Science	S	85	88	79	70	Yes	Under-7	M	BA	Moderate	Yes	Yes	75	28.6937	68.7578	397.28	56.0005	505.1
Female	19	Non Government	No	No	Mid	Mobile Data	3G	2024-01-03	No	Mobile	0.5	No	No	0	Always	No	Yes	Yes	Yes	KW	Environmental Science	F	2	7	4	8	No	Above-7	L	AA	Moderate	Yes	Yes	97	24.3324	58.5583	713.363	84.3211	942.56
Male	23	Non Government	No	Yes	Mid	Wifi	4G	2024-01-03	No	Mobile	0.5	No	No	2	Always	Yes	No	Yes	Yes	JO	Physics	S	5	4	5	8	No	Above-7	L	AA	Low	Yes	Yes	85	29.9156	66.9863	414.503	64.5711	664.523
Male	19	Non Government	No	Yes	Poor	Mobile Data	4G	2024-01-03	Yes	Mobile	0.5	Yes	No	2	Always	No	Yes	No	Yes	LEB	Chemistry	F	50	77	14	28	No	Under-7	M	AA	High	Yes	Yes	74	18.8856	50.6853	291.361	63.9715	834.25
Female	20	Non Government	No	Yes	Mid	Mobile Data	4G	2024-01-03	No	Mobile	0.5	No	Yes	0	Never	No	Yes	No	Yes	JO	Materials Science	S	55	74	25	29	No	Under-7	M	AA	Moderate	Yes	Yes	70	24.6463	34.6826	436.903	45.7146	888.458
Male	23	Non Government	No	Yes	Mid	Mobile Data	3G	2024-01-03	No	Mobile	0.5	No	No	0	Always	Yes	No	Yes	No	OM	Environmental Science	F	30	17	14	57	No	Above-7	L	CB	Low	Yes	Yes	64	29.6316	51.1271	344.876	66.4634	703.067
Male	21	Non Government	No	Yes	Mid	Wifi	4G	2024-01-03	Yes	Mobile	0.5	No	No	0	Always	Yes	Yes	Yes	Yes	JO	Statistics	S	35	14	23	62	No	Above-7	L	AA	Moderate	Yes	Yes	77	24.2772	35.0749	179.481	64.5546	639.461
Female	23	Government	No	Yes	Mid	Wifi	3G	2024-01-03	No	Mobile	0.5	No	No	8	Always	Yes	No	Yes	No	LEB	Physics	F	15	16	2	20	Yes	Under-7	M	BB	Moderate	Yes	Yes	74	25.5528	53.6997	847.125	53.8111	949.271
Male	23	Government	No	No	Mid	Mobile Data	4G	2024-01-03	No	Mobile	0.5	No	No	0	Always	Yes	Yes	No	No	KW	Engineering	F	20	20	3	25	Yes	Under-7	M	CC	Low	Yes	Yes	75	26.349	49.2997	867.8	89.4417	538.512
Female	22	Non Government	No	Yes	Poor	Mobile Data	3G	2024-01-03	No	Mobile	0.5	No	No	0	Always	No	Yes	Yes	Yes	LEB	Computer Science	F	10	7	0	30	No	Above-7	L	BB	Low	Yes	Yes	54	23.4545	54.903	297.775	82.9135	554.182
Male	24	Government	No	Yes	Mid	Mobile Data	4G	2024-01-03	No	Mobile	0.5	No	Yes	0	Always	No	No	Yes	No	OM	Mathematics	F	30	25	5	35	No	Above-7	L	AA	Low	Yes	Yes	72	25.5307	30.4019	158.295	74.9752	616.972
Male	18	Government	Yes	Yes	Mid	Mobile Data	4G	2024-01-03	No	Mobile	0.75	No	No	2	Never	Yes	No	Yes	Yes	UAE	Astronomy	F	40	50	12	50	No	Above-7	M	BA	Moderate	Yes	Yes	80	25.0118	37.7936	764.945	62.2407	915.679
Male	19	Government	No	No	Mid	Wifi	4G	2024-01-03	No	Mobile	0.5	No	No	2	Sometimes	Yes	Yes	Yes	Yes	OM	Geology	F	42	30	13	70	Yes	Above-7	M	AA	Moderate	Yes	Yes	73	28.8139	49.6532	290.376	57.7236	963.273
Female	20	Non Government	No	Yes	Mid	Wifi	4G	2024-03-06	No	Computer	0.5	Yes	Yes	0	Always	Yes	Yes	No	No	OM	English	F	35	12	0	17	No	Above-7	L	CB	Moderate	Yes	Yes	54	18.5454	68.0201	454.092	41.0938	532.041
Male	20	Non Government	Yes	Yes	Mid	Mobile Data	3G	2024-01-03	Yes	Computer	0.5	Yes	No	2	Always	Yes	Yes	Yes	No	LEB	Astronomy	F	50	10	15	22	Yes	Under-7	M	AA	Moderate	Yes	Yes	73	21.3716	45.3444	157.722	48.3442	918.322
Female	21	Non Government	Yes	Yes	Mid	Wifi	4G	2024-01-03	No	Mobile	0.5	No	Yes	2	Always	Yes	Yes	Yes	No	UAE	Environmental Science	F	12	21	16	50	Yes	Under-7	M	CC	Low	Yes	Yes	71	29.4049	46.9749	303.643	76.4376	554.922
Female	20	Non Government	No	Yes	Poor	Wifi	3G	2024-01-03	No	Mobile	0.5	No	No	12	Never	No	Yes	No	Yes	KW	Engineering	F	70	80	25	70	Yes	Under-7	M	BB	Moderate	Yes	Yes	67	28.6832	58.5878	813.612	57.2249	982.385
Male	22	Non Government	Yes	Yes	Poor	Wifi	4G	2024-01-03	Yes	Computer	0.5	Yes	No	8	Always	No	Yes	Yes	No	SA	Biology	F	50	88	30	80	Yes	Under-7	H	BB	High	Yes	Yes	55	23.4679	54.1517	823.957	82.9362	758.445
Male	20	Non Government	No	Yes	Mid	Mobile Data	3G	2024-01-03	No	Mobile	0.5	No	Yes	0	Always	Yes	Yes	Yes	No	LEB	Environmental Science	F	19	6	19	12	Yes	Under-7	M	CC	Moderate	Yes	Yes	78	25.4416	41.957	286.376	38.8747	404.252
Male	20	Government	No	Yes	Poor	Mobile Data	3G	2024-01-03	No	Mobile	0.5	Yes	Yes	0	Always	Yes	Yes	No	No	JO	Mathematics	F	5	1	0	11	No	Above-7	L	CB	Low	Yes	Yes	67	21.3286	46.4327	402.322	60.5008	420.478
Female	24	Non Government	Yes	Yes	Rich	Wifi	4G	2024-03-06	No	Computer	0.5	No	No	12	Always	Yes	Yes	Yes	No	UAE	Astronomy	F	20	14	12	19	No	Above-7	L	BB	High	Yes	Yes	72	20.2575	38.708	220.815	68.8179	488.491
Male	20	Government	No	Yes	Mid	Mobile Data	4G	0	No	Mobile	0.5	No	Yes	0	Always	Yes	Yes	No	No	JO	Astronomy	F	62	70	44	60	No	Above-7	H	CC	Low	Yes	Yes	84	23.5644	68.6409	166.755	61.0109	512.544
Female	22	Non Government	No	No	Mid	Wifi	4G	2024-01-03	No	Mobile	0.5	No	No	12	Sometimes	Yes	6	Yes	No	LEB	Geology	F	30	40	22	66	Yes	Under-7	M	BA	Low	Yes	Yes	55	22.2402	35.2254	992.955	83.3536	860.571
Male	20	Government	No	No	Mid	Mobile Data	3G	0	No	Mobile	0.5	No	Yes	2	Always	No	Yes	Yes	No	UAE	Biology	F	36	30	20	80	No	Above-7	M	CC	Low	Yes	Yes	59	25.0039	44.8735	690.035	89.3738	533.66
Male	21	Non Government	Yes	Yes	Mid	Wifi	3G	2024-01-03	Yes	Mobile	0.5	No	No	0	Never	No	No	Yes	Yes	KW	Computer Science	F	55	13	35	90	No	Above-7	M	BB	Moderate	Yes	Yes	60	18.9328	31.0336	587.887	36.9501	981.485
Male	18	Non Government	Yes	Yes	Mid	Wifi	4G	2024-01-03	No	Computer	0.75	No	No	2	Always	Yes	Yes	Yes	No	JO	Engineering	F	69	15	36	96	Yes	Under-7	M	CC	Moderate	Yes	Yes	64	29.6927	38.8712	788.949	37.7973	781.667
Male	24	Non Government	Yes	No	Mid	Wifi	4G	2024-03-06	Yes	Computer	1	No	No	0	Always	Yes	No	No	Yes	SA	English	F	70	50	40	99	Yes	Under-7	H	BB	Moderate	Yes	Yes	61	29.8345	61.2188	856.069	37.8194	815.511
Female	23	Non Government	No	No	Mid	Wifi	4G	2024-01-03	No	Mobile	0.5	No	No	12	Always	Yes	No	No	No	JO	Statistics	F	60	60	33	90	No	Above-7	M	BA	Low	Yes	Yes	62	26.3779	38.047	826.043	70.8706	530.69
Female	20	Non Government	No	Yes	Mid	Wifi	4G	2024-01-03	No	Mobile	0.5	No	No	0	Always	Yes	No	No	No	JO	Mathematics	F	10	12	4	80	No	Under-7	M	CC	Low	Yes	Yes	77	24.4332	33.2025	114.886	52.3606	935.624
Female	20	Non Government	No	Yes	Mid	Wifi	4G	2024-01-03	No	Mobile	0.5	Yes	Yes	12	Always	No	No	No	No	UAE	Mathematics	F	15	21	2	90	No	Under-7	M	AA	Low	Yes	Yes	58	21.7143	48.9781	268.127	73.9989	800.689
Male	18	Non Government	Yes	Yes	Mid	Wifi	3G	2024-03-06	Yes	Computer	0.75	Yes	No	0	Always	Yes	No	Yes	No	UAE	Engineering	F	2	0	2	50	No	Above-7	L	CC	Low	Yes	Yes	72	27.7655	30.3988	689.415	54.3283	918.643
Female	22	Government	No	No	Poor	Mobile Data	4G	0	No	Mobile	0.75	No	No	0	Always	Yes	No	No	Yes	LEB	Neuroscience	F	0	2	3	70	Yes	Above-7	L	CC	Low	Yes	Yes	72	26.2168	33.3906	438.183	67.6564	973.889
Male	22	Government	No	No	Poor	Mobile Data	2G	2024-01-03	No	Mobile	0.75	No	Yes	0	Always	Yes	Yes	Yes	Yes	KW	Biology	F	8	7	30	40	Yes	Above-7	L	DD	Low	Yes	Yes	73	19.9514	62.305	984.234	76.1915	475.385
Female	20	Non Government	No	Yes	Rich	Wifi	4G	2024-01-03	No	Mobile	0.75	No	No	0	Always	No	Yes	Yes	No	KW	Astronomy	F	19	19	25	40	Yes	Under-7	M	DC	High	Yes	Yes	88	28.9311	60.8589	698.864	62.893	457.952
Male	21	Government	No	No	Mid	Mobile Data	4G	0	No	Mobile	0.5	No	Yes	0	Always	No	Yes	Yes	Yes	SA	Astronomy	F	25	15	12	33	No	Above-7	L	DC	Moderate	Yes	Yes	58	27.8704	66.6056	960.894	62.3702	882.045
Female	18	Non Government	No	No	Mid	Wifi	4G	2024-01-03	No	Mobile	0.75	No	No	0	Always	No	Yes	Yes	No	SA	Computer Science	F	75	85	52	43	Yes	Under-7	M	DC	Low	Yes	Yes	55	29.3976	64.1806	281.302	35.2941	919.676
Female	22	Non Government	No	Yes	Mid	Mobile Data	4G	2024-01-03	No	Mobile	0.75	No	No	0	Always	Yes	No	No	No	UAE	Mathematics	F	30	90	33	35	No	Under-7	M	DD	Moderate	Yes	Yes	84	26.7086	57.327	877.561	54.6469	750.257
Female	24	Non Government	No	Yes	Mid	Wifi	4G	2024-01-03	No	Mobile	0.75	No	Yes	0	Always	No	Yes	No	No	JO	Neuroscience	F	35	80	50	70	Yes	Under-7	H	DD	Low	Yes	Yes	85	25.361	32.0933	389.217	62.7466	619.6
Female	21	Non Government	No	Yes	Mid	Wifi	4G	2024-03-06	No	Tab	0.25	No	Yes	2	Always	Yes	Yes	No	No	KW	Biology	F	4	5	40	16	Yes	Above-7	L	CB	Moderate	Yes	Yes	74	23.0189	61.3139	990.608	57.7188	791.578
Female	23	Non Government	No	Yes	Mid	Wifi	4G	2024-01-03	No	Mobile	0.25	No	No	2	Sometimes	No	6	No	Yes	KW	Astronomy	F	2	19	10	50	Yes	Above-7	L	DD	Low	Yes	Yes	54	29.1927	63.8204	241.92	84.0469	583.398
Female	24	Non Government	No	Yes	Mid	Mobile Data	4G	2024-01-03	No	Mobile	0.75	Yes	Yes	0	Always	Yes	Yes	Yes	No	KW	Physics	F	8	22	9	40	No	Above-7	L	CB	Moderate	Yes	Yes	72	28.3928	61.9633	564.706	84.3918	543.031
Female	22	Government	No	No	Poor	Mobile Data	2G	2024-01-03	No	Mobile	0.75	No	No	0	Always	Yes	Yes	Yes	No	LEB	Biology	F	12	11	8	40	No	Above-7	L	BB	Low	Yes	Yes	60	18.5426	50.3392	813.56	79.315	692.887
Female	21	Non Government	No	No	Mid	Mobile Data	3G	2024-01-03	No	Mobile	0.5	Yes	No	0	Sometimes	Yes	Yes	Yes	Yes	JO	Materials Science	F	10	12	17	30	No	Above-7	L	CB	Moderate	Yes	Yes	63	18.3164	39.3161	489.378	52.5179	529.692
Male	20	Government	No	Yes	Mid	Mobile Data	4G	0	No	Mobile	0.5	Yes	No	0	Always	No	Yes	No	No	JO	Computer Science	F	8	6	4	22	Yes	Above-7	L	BB	Low	Yes	Yes	54	22.5176	63.8132	521.276	73.0379	690.222
Male	18	Non Government	Yes	Yes	Rich	Wifi	4G	2024-01-03	Yes	Computer	0.75	Yes	No	2	Always	Yes	No	Yes	No	SA	Materials Science	F	45	54	26	90	Yes	Under-7	M	DD	High	Yes	Yes	66	27.7266	59.0865	987.72	53.7173	973.964
Female	20	Non Government	Yes	Yes	Mid	Wifi	4G	2024-01-03	No	Mobile	0.5	No	No	12	Always	Yes	Yes	No	Yes	UAE	Environmental Science	F	0	0	0	4	No	Above-7	L	DD	Low	Yes	Yes	63	29.8473	69.2304	482.777	43.9556	903.87
Male	21	Government	No	No	Mid	Mobile Data	4G	2024-01-03	No	Mobile	0.5	Yes	No	12	Always	No	Yes	No	No	OM	Engineering	F	50	90	37	70	Yes	Under-7	M	DD	Moderate	Yes	Yes	63	19.805	36.2277	643.665	50.5742	964.979
Female	20	Government	No	Yes	Mid	Mobile Data	3G	2024-01-03	No	Mobile	1	No	No	2	Always	Yes	Yes	Yes	No	UAE	Physics	F	14	13	3	70	No	Above-7	L	CB	Low	Yes	Yes	61	25.1296	39.0266	149.086	34.2579	883.797
Female	18	Non Government	No	Yes	Poor	Mobile Data	3G	2024-01-03	No	Mobile	0.75	No	No	0	Never	No	No	Yes	Yes	LEB	Statistics	F	19	20	16	50	No	Under-7	M	CC	Low	Yes	Yes	63	22.5707	38.4719	857.989	49.9067	612.851
Male	18	Government	No	No	Mid	Mobile Data	3G	0	No	Mobile	0.5	No	Yes	2	Always	Yes	No	No	Yes	LEB	Computer Science	F	10	12	7	33	Yes	Above-7	L	DC	Low	Yes	Yes	58	29.639	61.7016	683.351	57.6445	887.227
Female	24	Non Government	Yes	Yes	Mid	Wifi	3G	2024-03-06	Yes	Mobile	0.75	No	Yes	0	Always	Yes	Yes	No	Yes	KW	Chemistry	F	30	35	28	90	Yes	Under-7	M	DC	Moderate	Yes	Yes	84	28.1054	37.4763	463.618	87.3289	953.749
Male	22	Non Government	No	Yes	Mid	Mobile Data	4G	2024-01-03	No	Mobile	0.5	No	No	0	Always	Yes	No	No	No	LEB	Biology	F	33	33	30	90	No	Under-7	M	DC	Low	Yes	Yes	64	28.0599	32.6664	114.553	48.8046	968.221
Female	20	Non Government	No	Yes	Mid	Wifi	4G	2024-03-06	No	Tab	0.5	No	Yes	0	Sometimes	No	No	Yes	Yes	LEB	Neuroscience	F	20	12	15	70	No	Above-7	L	DC	Moderate	Yes	Yes	88	23.6243	69.9424	632.502	84.1472	809.919
Male	19	Non Government	Yes	Yes	Mid	Mobile Data	3G	2024-03-06	Yes	Mobile	1	Yes	Yes	0	Always	No	Yes	Yes	No	LEB	Statistics	F	7	10	1	30	No	Above-7	L	DC	Moderate	Yes	Yes	57	22.9778	30.9927	111.392	43.7315	526.82
Male	21	Non Government	Yes	Yes	Mid	Wifi	4G	2024-01-03	No	Computer	0.5	No	No	0	Always	Yes	No	No	No	LEB	English	F	70	4	39	90	Yes	Under-7	H	DD	Moderate	Yes	Yes	74	21.2809	63.4098	101.083	41.4581	423.837
Male	18	Government	No	Yes	Mid	Wifi	4G	2024-03-06	No	Mobile	None	Yes	No	0	Always	No	Yes	No	No	SA	Astronomy	F	13	80	40	88	Yes	Under-7	H	CB	Moderate	Yes	Yes	69	18.6765	44.6147	654.489	61.1397	488.32
Female	18	Non Government	No	Yes	Poor	Mobile Data	3G	2024-01-03	No	Mobile	0.5	No	No	0	Always	Yes	No	No	No	UAE	Physics	F	29	39	50	77	Yes	Under-7	M	DC	Moderate	Yes	Yes	61	28.3767	63.6646	270.115	70.3507	979.328
Male	24	Non Government	No	Yes	Mid	Wifi	4G	2024-03-06	No	Mobile	1	Yes	Yes	0	Sometimes	No	No	No	Yes	SA	Mathematics	F	20	14	12	70	No	Above-7	L	CC	Moderate	Yes	Yes	62	27.7548	52.1848	272.699	32.6599	677.258
Female	19	Government	No	No	Mid	Mobile Data	4G	2024-01-03	No	Mobile	0.75	No	Yes	0	Sometimes	No	No	No	No	OM	Computer Science	F	39	15	16	50	No	Above-7	L	DD	Low	Yes	Yes	80	29.9966	66.0652	687.944	43.264	912.992
Male	19	Government	No	Yes	Mid	Mobile Data	4G	0	No	Mobile	0.75	Yes	No	0	Always	No	No	Yes	No	SA	Statistics	F	55	90	16	40	No	Under-7	M	DC	Low	Yes	Yes	58	29.9596	67.0477	148.327	57.341	679.026
Male	20	Non Government	No	Yes	Poor	Mobile Data	3G	2024-01-03	No	Mobile	0.75	No	Yes	0	Never	No	No	No	Yes	JO	Physics	F	49	70	19	75	Yes	Under-7	H	DD	Moderate	Yes	Yes	72	24.6652	30.3639	382.065	49.8603	796.491
Male	20	Government	No	Yes	Mid	Wifi	4G	2024-01-03	No	Mobile	0.5	No	No	0	Never	No	No	No	Yes	KW	Astronomy	F	12	50	8	30	No	Above-7	L	DD	Moderate	Yes	Yes	58	27.2278	33.0165	234.489	72.7573	414.484
Male	20	Government	No	Yes	Mid	Wifi	3G	2024-01-03	Yes	Computer	0.75	No	No	0	Sometimes	No	Yes	Yes	Yes	LEB	Environmental Science	F	16	14	6	20	Yes	Above-7	L	DC	Moderate	Yes	Yes	61	29.3372	40.0143	622.159	60.6696	549.919
Female	18	Non Government	No	Yes	Mid	Mobile Data	4G	2024-01-03	No	Mobile	0.75	No	No	2	Always	No	No	Yes	Yes	OM	Chemistry	F	19	5	4	1	Yes	Above-7	L	DD	Moderate	Yes	Yes	64	28.1958	56.7726	695.589	39.6215	661.762
Male	22	Non Government	No	Yes	Poor	Mobile Data	3G	2024-01-03	No	Mobile	0.5	No	No	0	Always	No	No	Yes	Yes	OM	Geology	F	5	2	6	5	Yes	Above-7	L	DD	Low	Yes	Yes	70	20.9682	65.5309	749.022	83.6679	778.379
Male	24	Non Government	No	Yes	Mid	Wifi	4G	0	No	Mobile	0.75	No	No	12	Always	No	Yes	Yes	No	LEB	Geology	F	28	60	19	50	Yes	Under-7	M	DD	Low	Yes	Yes	58	23.4065	48.3977	329.708	47.5743	502.913
Female	19	Non Government	No	Yes	Mid	Mobile Data	4G	2024-01-03	No	Mobile	0.5	No	No	0	Sometimes	No	Yes	No	Yes	UAE	Computer Science	F	27	22	22	40	No	Under-7	M	BB	Moderate	Yes	Yes	63	19.5499	54.2789	180.325	73.8679	858.731
Male	21	Government	No	Yes	Mid	Wifi	4G	2024-01-03	No	Mobile	0.75	Yes	Yes	0	Always	Yes	No	No	No	UAE	Computer Science	F	21	10	28	20	No	Above-7	L	DD	Moderate	Yes	Yes	67	29.4486	37.54	170.815	76.7949	618.643
Female	23	Non Government	No	Yes	Mid	Mobile Data	4G	2024-01-03	No	Mobile	0.75	No	Yes	0	Always	No	No	No	Yes	UAE	Biology	F	50	70	32	40	Yes	Under-7	M	DD	Moderate	Yes	Yes	79	25.2741	62.1987	483.536	87.7895	890.461
Female	22	Non Government	No	Yes	Mid	Mobile Data	4G	2024-01-03	No	Mobile	0.75	Yes	Yes	0	Always	No	Yes	Yes	No	LEB	Engineering	F	80	90	70	80	Yes	Under-7	H	DC	Moderate	Yes	Yes	78	20.7437	68.6931	951.26	59.9104	458.781
Female	22	Non Government	No	Yes	Mid	Wifi	4G	2024-01-03	No	Mobile	1	No	Yes	2	Sometimes	Yes	Yes	No	Yes	OM	Materials Science	F	17	13	16	12	Yes	Under-7	M	DC	Moderate	Yes	Yes	63	26.0604	40.744	295.956	66.9501	807.854
Female	20	Non Government	No	Yes	Mid	Mobile Data	4G	2024-01-03	No	Mobile	0.5	No	Yes	0	Sometimes	No	Yes	No	Yes	OM	English	F	0	5	7	2	No	Above-7	L	DD	Moderate	Yes	Yes	61	25.4175	49.793	331.067	50.0926	575.997
Female	22	Non Government	No	Yes	Mid	Mobile Data	4G	2024-01-03	No	Mobile	0.5	No	No	2	Never	No	Yes	No	Yes	LEB	Astronomy	F	13	5	18	19	No	Above-7	L	BA	Moderate	Yes	Yes	66	22.298	33.4446	190.8	70.6908	877.23
Female	19	Non Government	No	Yes	Poor	Mobile Data	3G	2024-01-03	No	Mobile	1	No	Yes	0	Always	No	No	Yes	Yes	KW	Environmental Science	F	25	10	19	30	No	Above-7	M	BA	High	Yes	Yes	65	19.3627	52.3655	645.013	57.803	641.302
Male	23	Government	No	Yes	Mid	Wifi	4G	2024-01-03	No	Mobile	0.5	Yes	No	0	3	No	Yes	Yes	Yes	JO	Environmental Science	F	65	75	23	80	Yes	Under-7	H	BA	Moderate	Yes	Yes	58	26.0589	50.1113	711.886	56.2591	799.21
Female	20	Non Government	No	Yes	Mid	Wifi	4G	2024-01-03	No	Mobile	0.5	No	No	0	Never	No	Yes	No	Yes	SA	Mathematics	F	70	69	35	30	Yes	Under-7	H	AA	Low	Yes	Yes	75	24.2437	35.7775	678.638	81.3281	960.583
Male	18	Non Government	Yes	Yes	Poor	Mobile Data	3G	2024-01-03	Yes	Computer	1	Yes	Yes	8	Always	Yes	Yes	Yes	Yes	LEB	Geology	F	39	40	11	33	No	Under-7	M	BA	Moderate	Yes	Yes	64	27.2678	47.6826	875.017	33.0101	412.376
Male	22	Non Government	Yes	Yes	Mid	Mobile Data	3G	2024-03-06	Yes	Mobile	1	Yes	No	0	Always	Yes	Yes	Yes	Yes	UAE	Neuroscience	F	22	30	10	12	Yes	Above-7	L	AA	Moderate	Yes	Yes	80	24.242	43.3642	537.783	82.9177	406.67
Female	21	Government	No	No	Mid	Mobile Data	4G	2024-01-03	No	Mobile	1	No	No	0	Always	Yes	Yes	Yes	No	SA	Materials Science	F	29	22	9	20	Yes	Under-7	M	AA	Low	Yes	Yes	65	28.2262	50.8732	221.011	81.1242	862.168
Male	20	Non Government	No	Yes	Mid	Wifi	4G	2024-01-03	No	Mobile	0.5	No	Yes	0	Always	No	Yes	No	Yes	OM	Biology	F	11	2	2	8	No	Under-7	L	AA	Moderate	Yes	Yes	63	24.6229	53.4262	360.465	60.382	787.836
Female	21	Non Government	No	Yes	Mid	Mobile Data	4G	2024-01-03	No	Mobile	1	No	Yes	0	Never	No	Yes	No	No	KW	Environmental Science	F	19	30	26	19	Yes	Above-7	M	AA	Moderate	Yes	Yes	79	24.7313	30.3398	696.187	59.4122	575.788
Male	22	Non Government	Yes	No	Mid	Mobile Data	3G	2024-01-03	Yes	Computer	0.75	No	Yes	0	Always	No	No	Yes	Yes	OM	Materials Science	F	12	0	6	13	No	Under-7	L	BA	Moderate	Yes	Yes	68	28.5198	60.4402	651.81	51.7084	696.638
Female	23	Non Government	Yes	Yes	Mid	Mobile Data	3G	2024-01-03	No	Mobile	0.5	Yes	Yes	2	Sometimes	No	No	Yes	Yes	SA	Materials Science	F	50	90	29	60	Yes	Under-7	M	AA	Moderate	Yes	Yes	74	22.8418	58.5206	577.903	89.6504	425.161
Female	22	Government	No	No	Poor	Mobile Data	4G	2024-01-03	No	Mobile	0.5	Yes	Yes	0	Sometimes	Yes	Yes	Yes	No	SA	English	F	15	70	37	44	Yes	Under-7	M	Fail	Low	No	No	71	19.6082	44.6515	714.668	36.6702	515.467
Female	21	Non Government	No	Yes	Mid	Wifi	2G	2024-03-06	No	Mobile	1	No	Yes	0	Always	Yes	No	Yes	Yes	SA	Computer Science	F	20	80	33	33	Yes	Under-7	M	BA	Moderate	Yes	Yes	67	18.3454	32.1174	673.652	65.4129	654.698
Female	21	Government	No	No	Mid	Mobile Data	3G	0	No	Mobile	0.5	No	No	12	Always	Yes	No	No	No	LEB	Materials Science	F	13	3	11	9	No	Above-7	L	AA	Low	Yes	Yes	64	27.0616	60.1973	893.192	70.9009	900.427
Female	22	Non Government	No	Yes	Mid	Mobile Data	4G	2024-01-03	No	Mobile	0.75	Yes	Yes	0	Always	No	No	Yes	Yes	KW	English	F	80	90	49	55	Yes	Under-7	H	BB	Moderate	Yes	Yes	68	25.4437	68.207	627.415	86.0598	687.8
Male	22	Non Government	No	Yes	Rich	Wifi	4G	2024-03-06	No	Mobile	1	Yes	Yes	0	Always	No	Yes	Yes	No	JO	Neuroscience	F	8	15	10	40	Yes	Under-7	L	BA	High	Yes	Yes	52	26.449	39.6061	800.741	76.8122	751.818
Female	21	Non Government	No	Yes	Mid	Wifi	4G	2024-01-03	No	Mobile	0.75	Yes	Yes	12	Sometimes	No	Yes	6	Yes	UAE	Chemistry	F	8	25	1	70	No	Above-7	L	BB	Moderate	Yes	Yes	70	20.5556	42.941	323.836	68.6308	924.252
Female	20	Non Government	No	Yes	Mid	Mobile Data	4G	2024-01-03	No	Mobile	0.75	No	No	0	Never	No	No	No	Yes	UAE	English	F	7	5	2	80	Yes	Above-7	L	AA	Moderate	Yes	Yes	54	19.6365	37.3525	710.364	37.0087	585.291
Male	21	Government	No	No	Poor	Mobile Data	3G	2024-01-03	No	Mobile	0.75	No	Yes	0	Never	No	No	No	Yes	SA	Neuroscience	F	7	4	10	50	No	Above-7	M	Fail	Low	No	No	95	18.1745	53.0774	911.975	52.424	820.42
Male	22	Government	Yes	No	Mid	Mobile Data	3G	2024-01-03	No	Mobile	0.5	Yes	Yes	0	Always	Yes	Yes	Yes	No	LEB	Environmental Science	F	50	70	50	10	Yes	Above-7	H	BB	Low	Yes	Yes	62	22.2071	36.1937	447.159	38.3305	917
Male	18	Non Government	Yes	Yes	Mid	Wifi	3G	2024-01-03	No	Computer	0.5	Yes	Yes	0	Always	Yes	Yes	No	No	OM	English	F	1	0	1	12	No	Above-7	L	AA	Moderate	Yes	Yes	60	25.079	44.2478	801.194	82.8728	521.569
Female	19	Government	No	Yes	Mid	Wifi	4G	2024-01-03	No	Mobile	1	No	Yes	0	Sometimes	No	Yes	Yes	Yes	UAE	Chemistry	F	70	12	40	50	Yes	Under-7	H	CB	Low	Yes	Yes	63	22.7069	57.8805	752.31	74.9773	613.887
Male	19	Non Government	No	Yes	Mid	Mobile Data	4G	2024-01-03	No	Mobile	1	No	Yes	0	Always	No	Yes	No	No	JO	Environmental Science	F	19	70	3	50	No	Under-7	L	BB	Moderate	Yes	Yes	55	23.2497	52.4046	153.574	75.4522	987.886
Male	22	Government	No	No	Poor	Mobile Data	3G	2024-01-03	No	Mobile	1	No	No	0	Always	Yes	Yes	Yes	Yes	LEB	Materials Science	F	3	12	4	33	No	Under-7	L	BB	Moderate	Yes	Yes	68	28.8499	45.4585	623.357	69.1354	989.931
Male	24	Non Government	No	Yes	Mid	Mobile Data	4G	2024-03-06	No	Mobile	0.75	No	Yes	0	Sometimes	No	Yes	Yes	Yes	SA	Astronomy	F	5	20	1	50	Yes	Above-7	L	AA	Moderate	Yes	Yes	81	22.1791	46.81	217.17	60.4226	533.938
Male	19	Non Government	Yes	No	Mid	Mobile Data	3G	2024-01-03	No	Mobile	0.5	Yes	Yes	0	Never	No	No	Yes	Yes	OM	Astronomy	F	4	8	10	60	Yes	Above-7	L	BA	Moderate	Yes	Yes	61	24.1679	52.4844	970.587	38.9983	439.868
Male	22	Non Government	No	Yes	Rich	Mobile Data	3G	2024-01-03	No	Mobile	0.5	Yes	Yes	0	Sometimes	No	No	Yes	No	LEB	Neuroscience	F	80	90	55	19	Yes	Under-7	H	Fail	Moderate	No	No	71	27.4038	30.2346	830.267	49.7817	562.553
Male	18	Non Government	Yes	Yes	Poor	Wifi	4G	2024-01-03	Yes	Computer	1	No	Yes	0	Always	Yes	No	No	Yes	LEB	Mathematics	F	50	70	19	15	Yes	Under-7	H	BA	High	Yes	Yes	76	22.7585	33.1404	198.751	38.2149	638.639
Male	23	Non Government	No	Yes	Mid	Mobile Data	4G	2024-01-03	No	Mobile	0.75	Yes	Yes	12	Sometimes	No	No	Yes	Yes	OM	Engineering	F	55	89	40	40	Yes	Under-7	H	Fail	Low	No	No	72	25.465	65.2503	209.577	73.4948	664.603
Female	22	Non Government	No	No	Mid	Mobile Data	3G	0	No	Mobile	0.75	Yes	No	2	Sometimes	No	No	Yes	Yes	SA	Environmental Science	F	80	44	35	10	No	Above-7	L	Fail	Low	No	No	65	28.3484	33.1152	635.026	39.6137	771.284
Male	19	Government	No	Yes	Mid	Mobile Data	4G	0	No	Mobile	0.5	Yes	Yes	0	Always	No	Yes	No	Yes	KW	Environmental Science	F	100	80	2	70	No	Under-7	H	CC	Low	Yes	Yes	67	29.3942	58.2721	410.4	72.1268	939.702
Male	18	Non Government	No	Yes	Mid	Mobile Data	3G	2024-01-03	No	Mobile	0.75	No	No	0	Never	No	Yes	Yes	No	LEB	Environmental Science	F	14	60	11	75	Yes	Under-7	H	CC	Low	Yes	Yes	68	19.7649	66.8015	131.415	71.5353	598.209
Male	19	Non Government	Yes	Yes	Mid	Wifi	4G	2024-01-03	No	Mobile	0.75	No	No	0	Always	Yes	No	No	No	JO	Neuroscience	F	6	2	38	12	No	Under-7	M	AA	Low	Yes	Yes	73	29.1191	40.8273	587.477	57.5583	909.991
Female	24	Non Government	Yes	Yes	Mid	Wifi	3G	2024-03-06	Yes	Mobile	0.75	Yes	Yes	12	Sometimes	No	Yes	No	Yes	KW	Engineering	F	10	3	0	30	No	Under-7	M	CB	Moderate	Yes	Yes	80	23.9054	44.8197	449.061	38.1137	456.087
Male	18	Government	No	Yes	Mid	Wifi	4G	2024-03-06	No	Mobile	1	No	No	12	Always	Yes	No	Yes	No	JO	Biology	F	50	7	9	50	Yes	Above-7	M	BB	Moderate	Yes	Yes	55	21.0989	52.7569	190.969	48.888	425.125
Male	20	Government	Yes	Yes	Mid	Mobile Data	3G	2024-01-03	No	Computer	0.5	Yes	No	0	Always	Yes	Yes	No	No	OM	Astronomy	F	50	90	40	90	Yes	Under-7	M	AA	Low	Yes	Yes	61	23.5096	65.2684	821.728	49.2056	702.427
Male	19	Government	Yes	Yes	Mid	Wifi	4G	2024-03-06	No	Computer	0.5	Yes	No	0	Always	Yes	No	Yes	Yes	LEB	Chemistry	F	70	92	50	7	Yes	Under-7	H	AA	Low	Yes	Yes	74	29.7604	67.6762	923.569	72.0231	435.797
Male	23	Government	No	No	Poor	Mobile Data	2G	2024-01-03	No	Mobile	0.5	No	No	2	Never	No	No	No	Yes	OM	Chemistry	F	2	6	2	8	No	Above-7	L	AA	Low	Yes	Yes	69	23.9114	59.5825	780.935	36.8246	635.494
Male	22	Government	Yes	Yes	Mid	Mobile Data	4G	2024-01-03	No	Mobile	0.5	Yes	No	2	Always	No	Yes	No	No	KW	Mathematics	F	1	7	6	10	No	Above-7	L	AA	Moderate	Yes	Yes	68	21.945	33.4648	840.18	79.7441	938.067
Male	22	Non Government	Yes	Yes	Mid	Wifi	4G	2024-01-03	Yes	Computer	0.5	No	No	12	Always	Yes	No	Yes	Yes	UAE	Neuroscience	F	0	12	3	3	Yes	Above-7	M	AA	High	Yes	Yes	68	25.6008	56.7662	294.842	75.6604	544.89
Female	23	Non Government	Yes	No	Poor	Wifi	2G	2024-03-06	Yes	Tab	0.5	No	No	2	Always	Yes	No	Yes	Yes	LEB	Statistics	F	0	0	5	80	Yes	Above-7	L	BA	Low	Yes	Yes	85	20.8817	46.4121	337.216	41.1784	823.585
Female	22	Non Government	No	Yes	Poor	Mobile Data	3G	2024-01-03	No	Mobile	0.75	No	No	0	Always	No	Yes	Yes	Yes	UAE	Materials Science	F	12	26	7	40	Yes	Under-7	M	CC	Low	Yes	Yes	70	18.9104	48.828	287.675	73.1499	581.419
Female	22	Non Government	No	Yes	Mid	Wifi	4G	2024-03-06	No	Computer	0.5	Yes	Yes	2	Sometimes	No	Yes	Yes	Yes	LEB	English	F	70	90	41	33	Yes	Under-7	H	BA	Moderate	Yes	Yes	68	19.5466	31.9659	788.557	70.1108	426.952
Male	20	Non Government	Yes	Yes	Poor	Wifi	3G	2024-03-06	No	Mobile	0.5	No	Yes	0	Always	No	No	No	Yes	UAE	Geology	F	7	12	5	3	No	Above-7	M	CC	Low	Yes	Yes	85	19.5366	37.6425	953.125	74.8872	734.014
Male	22	Non Government	No	Yes	Mid	Wifi	4G	2024-01-03	No	Mobile	0.5	No	No	12	Never	No	Yes	No	No	UAE	Astronomy	F	90	70	30	14	No	Under-7	M	Fail	Moderate	No	No	64	19.8228	61.6205	745.153	41.3357	900.912
Male	21	Government	No	Yes	Rich	Mobile Data	4G	2024-01-03	No	Mobile	0.5	No	No	12	Sometimes	No	No	No	Yes	UAE	Chemistry	F	70	88	55	40	Yes	Under-7	H	BA	Moderate	Yes	Yes	66	19.6659	48.1584	893.32	39.4554	645.681
Female	22	Government	No	Yes	Mid	Mobile Data	4G	2024-01-03	No	Mobile	0.75	Yes	Yes	8	Sometimes	No	Yes	No	Yes	OM	Engineering	F	77	80	51	80	No	Under-7	M	Fail	Low	No	No	61	25.6905	42.0665	674.829	44.189	770.376
Male	22	Government	Yes	Yes	Rich	Wifi	4G	2024-01-03	No	Computer	0.75	No	No	0	Always	Yes	No	No	No	LEB	Engineering	F	2	5	3	50	No	Above-7	L	Fail	High	No	No	69	20.1826	45.3608	448.894	51.9523	940.014
Male	18	Non Government	Yes	Yes	Mid	Wifi	3G	2024-03-06	Yes	Computer	1	No	No	0	Always	Yes	No	No	Yes	OM	Chemistry	F	25	27	0	69	No	Above-7	L	AA	Low	Yes	Yes	68	22.148	64.176	483.185	77.6199	873.817
Male	22	Non Government	No	Yes	Mid	Mobile Data	4G	2024-01-03	No	Mobile	0.75	Yes	Yes	12	Never	No	No	Yes	Yes	KW	Chemistry	F	11	2	0	50	No	Above-7	L	BA	Moderate	Yes	Yes	61	28.7615	59.96	167.789	74.2754	516.326
Male	20	Government	Yes	No	Rich	Wifi	4G	0	No	Mobile	0.5	No	No	0	Always	No	Yes	No	Yes	KW	Mathematics	F	0	8	11	70	Yes	Above-7	L	BA	Low	Yes	Yes	53	23.6875	40.8926	128.311	85.5271	840.03
Male	21	Non Government	No	Yes	Mid	Wifi	4G	2024-01-03	Yes	Mobile	1	No	Yes	0	Always	Yes	No	No	No	UAE	Chemistry	F	77	80	12	19	Yes	Above-7	M	AA	Moderate	Yes	Yes	75	26.0107	34.7001	725.928	33.5178	701.136
Male	22	Government	No	No	Poor	Mobile Data	4G	2024-03-06	No	Mobile	0.5	No	No	0	Always	Yes	No	No	Yes	LEB	Neuroscience	F	25	29	40	17	No	Under-7	H	BA	Moderate	Yes	Yes	70	20.0678	40.0799	494.586	30.6934	847.58
Female	19	Non Government	No	Yes	Poor	Mobile Data	4G	2024-03-06	No	Mobile	0.75	No	No	12	Always	Yes	No	No	No	UAE	Engineering	F	24	35	23	22	Yes	Above-7	M	BA	Moderate	Yes	Yes	78	20.3075	66.8303	596.994	71.9483	696.709
Female	18	Government	No	Yes	Mid	Wifi	4G	2024-01-03	No	Mobile	0.5	No	No	2	Sometimes	No	No	Yes	No	LEB	Chemistry	F	60	60	3	60	No	Under-7	M	BB	Low	Yes	Yes	80	18.4904	53.2636	601.895	46.7572	476.775
Female	24	Government	No	Yes	Rich	Mobile Data	4G	2024-01-03	Yes	Mobile	1	Yes	No	0	Never	No	No	Yes	No	OM	Chemistry	F	21	12	0	50	Yes	Under-7	M	AA	Low	Yes	Yes	69	20.0272	51.3392	349.638	50.0447	741.946
Female	24	Government	No	Yes	Poor	Mobile Data	4G	0	No	Mobile	1	No	No	0	Never	No	No	No	No	SA	Environmental Science	F	0	4	8	30	No	Above-7	L	AA	Low	Yes	Yes	68	21.3431	53.8557	528.303	62.8081	695.28
Female	23	Non Government	No	Yes	Rich	Wifi	4G	2024-03-06	No	Tab	0.5	Yes	No	0	Always	Yes	Yes	Yes	No	LEB	Biology	F	66	90	55	12	Yes	Above-7	M	BB	Moderate	Yes	Yes	80	20.1241	44.6411	523.684	36.1448	710.753
Female	19	Government	No	No	Mid	Mobile Data	3G	0	No	Mobile	0.25	Yes	Yes	12	Always	Yes	Yes	No	No	UAE	Environmental Science	F	70	98	7	5	Yes	Under-7	M	AA	Low	Yes	Yes	63	19.0644	62.2843	449.584	68.5617	927.341
Male	21	Government	Yes	No	Mid	Mobile Data	3G	2024-01-03	No	Mobile	0.5	No	No	2	Always	Yes	No	Yes	No	UAE	Geology	F	0	6	4	15	Yes	Under-7	L	BA	Moderate	Yes	Yes	57	19.4476	50.9314	838.608	49.5088	936.902
Male	22	Government	No	No	Poor	Mobile Data	4G	2024-03-06	No	Mobile	0.5	No	No	0	Always	No	Yes	No	No	JO	Materials Science	F	12	30	0	17	No	Above-7	L	BB	Moderate	Yes	Yes	70	23.5293	34.6699	506.048	67.9629	672.122
Male	23	Government	No	Yes	Mid	Wifi	4G	2024-01-03	No	Mobile	0.5	No	Yes	0	Always	Yes	Yes	No	No	KW	Astronomy	F	2	9	7	55	Yes	Under-7	M	AA	High	Yes	Yes	68	20.476	35.1626	643.28	80.0404	673.439
Female	21	Government	No	No	Mid	Mobile Data	4G	0	No	Mobile	0.5	Yes	No	0	Always	Yes	Yes	Yes	No	SA	Geology	F	55	33	6	9	No	Above-7	L	AA	Low	Yes	Yes	60	22.3712	51.4744	905.968	40.2667	709.112
Male	23	Non Government	No	Yes	Mid	Mobile Data	3G	2024-01-03	No	Mobile	0.5	No	No	0	Never	No	No	No	No	JO	English	F	12	10	20	16	No	Under-7	L	BB	Moderate	Yes	Yes	72	24.041	67.4628	879.61	85.8524	711.754
Male	22	Non Government	No	Yes	Mid	Wifi	4G	2024-01-03	No	Mobile	0.75	No	No	0	Never	No	No	Yes	Yes	SA	Computer Science	F	70	90	2	2	Yes	Under-7	L	CC	Low	Yes	Yes	84	26.2847	42.3341	901.38	61.8413	970.232
Male	19	Non Government	No	Yes	Mid	Mobile Data	4G	2024-01-03	No	Mobile	1	Yes	Yes	0	Always	No	Yes	Yes	No	KW	Computer Science	F	7	9	5	30	No	Above-7	L	CC	Low	Yes	Yes	66	18.4717	64.7816	343.004	85.3757	789.64
Female	24	Non Government	No	Yes	Mid	Mobile Data	4G	2024-01-03	No	Mobile	0.5	Yes	No	0	Always	No	Yes	No	No	JO	Astronomy	F	80	42	20	50	Yes	Under-7	M	BB	Moderate	Yes	Yes	71	27.5929	60.5638	131.484	42.4638	566.474
Male	23	Non Government	No	Yes	Mid	Wifi	4G	2024-03-06	No	Computer	0.5	No	No	2	Always	Yes	No	No	Yes	KW	Materials Science	S	0	3	10	3	No	Above-7	L	AA	Moderate	Yes	Yes	83	25.5348	39.9125	334.96	66.2738	718.922
Male	22	Government	No	No	Mid	Wifi	4G	0	No	Mobile	0.5	Yes	No	0	Always	Yes	Yes	No	No	OM	Statistics	S	12	60	0	70	Yes	Above-7	L	BA	Low	Yes	Yes	55	18.9811	31.4536	350.837	54.2332	776.334
Male	21	Non Government	No	Yes	Poor	Mobile Data	3G	2024-01-03	No	Mobile	0.5	No	No	2	Always	Yes	No	Yes	No	UAE	Materials Science	S	80	80	15	70	Yes	Under-7	H	BA	Low	Yes	Yes	65	28.4829	34.0739	918.424	76.4533	783.863
Female	24	Non Government	No	Yes	Poor	Mobile Data	3G	2024-01-03	No	Mobile	0.75	No	No	12	Always	Yes	Yes	No	No	OM	Mathematics	S	70	80	95	70	Yes	Under-7	H	AA	High	Yes	Yes	81	29.0505	59.1398	684.318	66.3545	751.153
Female	21	Non Government	No	Yes	Mid	Mobile Data	4G	2024-01-03	No	Mobile	0.75	Yes	No	12	Always	Yes	Yes	Yes	Yes	SA	Neuroscience	S	70	80	95	70	Yes	Under-7	H	BA	Moderate	Yes	Yes	60	18.7329	37.9868	173.534	59.6709	506.642
Female	19	Non Government	No	Yes	Poor	Mobile Data	3G	2024-01-03	No	Mobile	0.5	Yes	Yes	2	Sometimes	No	No	Yes	Yes	KW	Biology	F	60	80	50	40	No	Under-7	M	AA	Low	Yes	Yes	50	21.3225	44.8508	221.841	84.7791	420.156
Female	23	Government	No	Yes	Poor	Mobile Data	4G	0	No	Mobile	1	No	No	0	Always	Yes	No	Yes	Yes	JO	Chemistry	F	100	80	95	90	No	Under-7	H	BA	Low	Yes	Yes	65	27.6744	50.068	240.109	52.627	602.706
Male	24	Non Government	No	Yes	Rich	Wifi	4G	2024-03-06	No	Computer	0.5	No	No	0	Always	No	Yes	Yes	Yes	KW	Statistics	F	100	85	85	70	No	Under-7	M	AA	High	Yes	Yes	48	26.9791	59.0187	667.38	43.1988	656.513
Male	18	Non Government	No	Yes	Mid	Mobile Data	4G	2024-01-03	No	Mobile	0.5	No	No	2	Always	Yes	No	Yes	Yes	JO	Geology	F	10	60	5	20	Yes	Above-7	L	AA	High	Yes	Yes	54	20.2143	34.5292	761.873	66.4861	437.083
Female	18	Non Government	Yes	No	Mid	Mobile Data	3G	2024-01-03	Yes	Mobile	0.5	Yes	No	2	Always	No	Yes	No	Yes	JO	Geology	S	19	65	50	10	No	Above-7	L	AA	Moderate	Yes	Yes	65	20.5122	46.2547	873.68	67.4417	888.98
Male	20	Non Government	Yes	Yes	Mid	Mobile Data	3G	2024-03-06	Yes	Mobile	0.5	No	Yes	0	Never	No	Yes	No	Yes	UAE	Chemistry	S	10	75	55	11	Yes	Under-7	M	AA	Moderate	Yes	Yes	67	22.4457	49.4029	946.573	56.3457	606.446
Female	21	Non Government	Yes	Yes	Mid	Mobile Data	4G	2024-01-03	No	Mobile	0.5	No	No	0	Always	Yes	No	Yes	No	SA	Astronomy	S	80	90	55	19	Yes	Under-7	H	CB	Moderate	Yes	Yes	54	23.8143	51.6331	281.534	59.1966	948.18
Male	20	Non Government	No	Yes	Poor	Mobile Data	4G	2024-01-03	No	Mobile	0.5	No	No	0	Always	Yes	Yes	Yes	Yes	LEB	Biology	S	10	10	15	19	No	Above-7	L	AA	Low	Yes	Yes	94	25.4191	62.7344	378.795	87.5732	492.646
Male	21	Non Government	No	Yes	Mid	Wifi	4G	2024-01-03	No	Computer	0.5	No	No	8	Always	Yes	No	Yes	No	JO	Geology	S	70	75	55	11	Yes	Under-7	M	BB	Low	Yes	Yes	72	22.427	36.8671	316.291	73.9611	434.161
Male	23	Government	No	Yes	Mid	Wifi	4G	2024-01-03	No	Mobile	0.5	No	No	0	Always	Yes	Yes	No	No	KW	Mathematics	S	100	75	50	70	Yes	Under-7	H	CC	Low	Yes	Yes	63	23.5504	62.3133	422.885	36.6361	689.39
Male	19	Government	No	Yes	Mid	Wifi	4G	2024-01-03	No	Mobile	0.5	No	No	0	Always	No	Yes	Yes	Yes	JO	Astronomy	S	10	79	30	30	No	Under-7	M	BB	High	Yes	Yes	60	26.9697	57.7151	923.199	42.7278	513.478
Male	24	Non Government	No	Yes	Rich	Wifi	4G	2024-03-06	No	Mobile	0.5	No	Yes	0	Always	No	No	Yes	No	JO	Environmental Science	S	60	55	30	40	No	Under-7	M	AA	High	Yes	Yes	54	18.4402	52.2348	617.601	88.5346	962.44
Male	22	Government	No	Yes	Mid	Wifi	4G	2024-01-03	No	Mobile	0.75	No	No	2	Never	Yes	No	Yes	Yes	SA	Materials Science	S	100	75	50	70	Yes	Under-7	H	BA	Moderate	Yes	Yes	58	21.0292	57.9811	764.373	73.5879	406.182
Female	21	Non Government	No	Yes	Poor	Mobile Data	3G	2024-01-03	No	Mobile	0.5	No	No	2	Sometimes	Yes	Yes	Yes	Yes	JO	Computer Science	S	80	80	51	59	Yes	Under-7	H	AA	Moderate	Yes	Yes	59	26.5602	46.4807	541.107	84.9027	647.572
Female	22	Non Government	No	No	Mid	Wifi	4G	2024-03-06	No	Mobile	0.5	Yes	Yes	0	Always	Yes	Yes	No	No	UAE	Chemistry	S	23	63	71	89	Yes	Under-7	M	CB	Moderate	Yes	Yes	64	28.7425	35.5359	125.972	48.2317	956.049
Female	24	Non Government	No	Yes	Mid	Mobile Data	4G	2024-01-03	No	Mobile	0.5	Yes	No	2	Always	Yes	Yes	Yes	No	KW	Chemistry	S	100	91	98	40	Yes	Under-7	H	AA	Moderate	Yes	Yes	68	24.1401	56.6306	157.776	74.512	630.651
Female	19	Non Government	Yes	Yes	Mid	Mobile Data	3G	2024-01-03	No	Mobile	0.5	No	Yes	2	Always	Yes	Yes	Yes	No	UAE	Biology	S	10	51	40	40	No	Above-7	L	CC	Low	Yes	Yes	58	24.3854	50.9869	584.131	72.8402	455.866
Female	23	Government	No	Yes	Mid	Wifi	3G	0	Yes	Mobile	0.5	No	No	12	Never	No	Yes	No	Yes	SA	Biology	S	70	50	33	41	No	Above-7	M	BB	Low	Yes	Yes	64	19.2861	55.575	746.91	47.6814	581.737
Male	22	Government	No	Yes	Mid	Mobile Data	4G	2024-01-03	No	Mobile	0.5	Yes	No	8	Always	No	Yes	Yes	No	LEB	Geology	S	70	58	73	91	Yes	Under-7	H	BB	Moderate	Yes	Yes	78	23.3689	43.52	293.797	63.049	698.806
Female	21	Government	No	Yes	Mid	Wifi	4G	0	No	Mobile	0.5	No	Yes	0	Always	Yes	Yes	Yes	No	KW	Engineering	S	70	50	30	49	Yes	Under-7	M	CC	Low	Yes	Yes	58	24.3914	66.2747	749.719	67.6449	511.091
Female	19	Non Government	No	Yes	Mid	Mobile Data	4G	2024-01-03	No	Mobile	0.5	Yes	Yes	0	Always	Yes	Yes	No	No	OM	Engineering	S	70	50	33	40	No	Under-7	M	CB	Moderate	Yes	Yes	97	20.9096	53.4948	829.599	58.8679	679.937
Female	19	Non Government	No	Yes	Poor	Mobile Data	4G	2024-01-03	No	Mobile	0.5	No	No	12	Always	Yes	Yes	Yes	No	OM	Biology	S	22	51	48	10	No	Above-7	L	BB	Moderate	Yes	Yes	60	21.2309	33.4161	470.708	79.6307	901.806
Male	23	Non Government	No	Yes	Poor	Mobile Data	3G	2024-01-03	No	Mobile	0.5	No	Yes	0	Always	Yes	Yes	No	No	KW	Astronomy	S	62	68	48	80	Yes	Under-7	M	CC	Moderate	Yes	Yes	73	22.5274	47.9922	771.777	79.9721	923.571
Male	22	Non Government	No	Yes	Rich	Mobile Data	4G	2024-01-03	No	Mobile	0.5	No	No	12	Sometimes	Yes	6	Yes	No	LEB	Computer Science	S	82	89	58	50	Yes	Under-7	H	BA	High	Yes	Yes	64	18.2409	60.2542	463.627	81.036	429.556
Male	23	Non Government	No	Yes	Mid	Mobile Data	4G	2024-01-03	No	Mobile	0.5	No	Yes	2	Always	No	Yes	Yes	No	KW	Physics	S	72	80	58	66	No	Under-7	M	CC	Moderate	Yes	Yes	70	21.8649	61.7654	710.516	78.2054	496.542
Male	21	Government	No	No	Mid	Wifi	4G	2024-01-03	No	Mobile	0.5	No	No	0	Never	No	No	Yes	Yes	KW	Materials Science	S	70	82	3	73	No	Under-7	H	BB	Low	Yes	Yes	75	20.5374	49.7839	787.597	59.285	565.174
Female	20	Non Government	No	Yes	Rich	Wifi	4G	2024-01-03	No	Mobile	0.75	No	No	2	Always	Yes	Yes	Yes	No	LEB	Biology	S	60	82	93	43	No	Above-7	M	CC	High	Yes	Yes	73	21.93	65.7899	992.734	52.8863	756.92
Male	21	Non Government	No	Yes	Mid	Wifi	4G	2024-01-03	No	Mobile	1	No	No	0	Always	Yes	No	No	Yes	KW	English	S	55	72	83	14	Yes	Above-7	M	BB	Low	Yes	Yes	53	19.4371	40.7067	410.857	79.8826	616.597
Female	24	Non Government	No	Yes	Poor	Mobile Data	3G	2024-01-03	No	Mobile	0.5	No	No	12	Always	Yes	No	No	No	UAE	Neuroscience	S	72	65	73	66	Yes	Under-7	H	BA	Moderate	Yes	Yes	66	28.6863	46.4239	469.937	59.4121	906.425
Male	22	Government	No	No	Poor	Mobile Data	4G	0	No	Mobile	0.5	No	No	0	Always	Yes	No	No	No	KW	Environmental Science	S	51	82	53	43	No	Under-7	M	CC	Low	Yes	Yes	75	25.1231	65.9439	249.058	44.7823	830.003
Male	23	Government	Yes	No	Poor	Mobile Data	4G	2024-01-03	No	Mobile	0.5	Yes	Yes	12	Always	No	No	No	No	LEB	Materials Science	S	80	92	83	43	Yes	Under-7	H	AA	Moderate	Yes	Yes	80	26.1492	65.8503	283.666	60.4406	460.274
Male	24	Non Government	No	Yes	Poor	Mobile Data	4G	2024-01-03	Yes	Mobile	0.75	Yes	No	0	Always	Yes	No	Yes	No	KW	English	S	60	52	23	33	Yes	Under-7	H	CC	High	Yes	Yes	65	27.4701	57.4285	724.056	38.511	774.735
Male	22	Government	No	Yes	Mid	Wifi	4G	2024-01-03	No	Mobile	0.75	No	No	0	Always	Yes	No	No	Yes	UAE	Environmental Science	S	30	12	29	23	No	Under-7	M	CC	Moderate	Yes	Yes	67	23.9813	64.3592	925.341	71.4978	467.808
Female	20	Government	No	No	Mid	Mobile Data	3G	2024-01-03	No	Mobile	0.75	No	Yes	0	Always	Yes	Yes	Yes	Yes	JO	Statistics	S	40	62	83	33	Yes	Under-7	H	DD	Low	Yes	Yes	61	19.043	33.5509	455.144	50.1553	553.021
Male	23	Government	Yes	No	Poor	Mobile Data	4G	2024-01-03	No	Mobile	0.75	No	No	0	Always	No	Yes	Yes	No	UAE	Mathematics	S	60	52	23	33	No	Under-7	M	DC	Moderate	Yes	Yes	67	24.4453	64.5998	261.86	45.6395	506.722
Male	18	Government	Yes	No	Mid	Mobile Data	4G	0	No	Mobile	0.5	No	Yes	0	Always	No	Yes	Yes	Yes	SA	Computer Science	S	20	22	53	13	No	Above-7	L	DC	Low	Yes	Yes	80	25.0421	42.8248	356.59	87.3905	503.837
Female	20	Government	No	Yes	Mid	Mobile Data	4G	2024-01-03	No	Mobile	0.75	No	No	0	Always	No	Yes	Yes	No	LEB	Chemistry	S	20	52	23	33	Yes	Above-7	L	DC	Low	Yes	Yes	61	26.9453	37.1333	509.547	76.6129	769.837
Male	24	Non Government	Yes	Yes	Mid	Wifi	4G	2024-03-06	Yes	Computer	0.75	No	No	0	Always	Yes	No	No	No	UAE	Astronomy	S	50	62	73	43	Yes	Above-7	M	DD	Low	Yes	Yes	97	23.1799	39.5748	361.585	77.2242	738.163
Male	23	Non Government	No	Yes	Rich	Mobile Data	3G	2024-01-03	No	Mobile	0.75	No	Yes	0	Always	No	Yes	No	No	OM	Environmental Science	S	10	2	13	53	No	Above-7	L	DD	Moderate	Yes	Yes	60	19.531	46.7187	310.221	67.4233	505.617
Male	19	Government	No	Yes	Mid	Wifi	4G	2024-01-03	No	Mobile	0.25	No	Yes	2	Always	Yes	Yes	No	No	SA	Chemistry	S	60	52	23	33	Yes	Under-7	H	CB	High	Yes	Yes	58	21.4053	40.0477	762.386	80.3504	994.104
Female	18	Non Government	No	Yes	Mid	Wifi	4G	2024-01-03	No	Mobile	0.25	No	No	2	Sometimes	No	6	No	Yes	OM	Chemistry	S	15	52	83	11	Yes	Under-7	M	DD	Low	Yes	Yes	64	22.357	42.8227	107.06	75.5497	653.102
Female	20	Non Government	Yes	Yes	Mid	Mobile Data	3G	2024-01-03	No	Mobile	0.75	Yes	Yes	0	Always	Yes	Yes	Yes	No	SA	Biology	S	80	42	33	13	Yes	Under-7	H	CB	Low	Yes	Yes	84	25.751	35.3991	585.307	65.9264	458.242
Female	23	Government	No	Yes	Mid	Wifi	4G	2024-01-03	Yes	Mobile	0.75	No	No	0	Always	Yes	Yes	Yes	No	KW	Environmental Science	S	40	51	20	33	No	Under-7	M	BB	Low	Yes	Yes	67	24.8493	41.8471	814.39	87.6675	472.341
Male	19	Non Government	No	Yes	Mid	Wifi	4G	2024-01-03	No	Mobile	0.5	Yes	No	0	Sometimes	Yes	Yes	Yes	Yes	JO	Mathematics	S	60	70	63	93	Yes	Under-7	H	CB	Moderate	Yes	Yes	66	22.2732	52.8914	339.605	41.4957	750.336
Female	20	Non Government	No	Yes	Poor	Mobile Data	4G	2024-01-03	No	Mobile	0.5	Yes	No	0	Always	No	Yes	No	No	JO	Neuroscience	S	50	62	13	33	No	Above-7	L	BB	Moderate	Yes	Yes	65	29.8382	47.6741	642.962	86.6028	987.442
Male	24	Non Government	No	Yes	Mid	Mobile Data	3G	2024-01-03	No	Mobile	0.75	Yes	No	2	Always	Yes	No	Yes	No	SA	Mathematics	S	85	75	62	53	Yes	Under-7	H	DD	Low	Yes	Yes	85	25.2693	43.8688	702.01	54.0863	743.171
Male	24	Non Government	No	Yes	Mid	Mobile Data	3G	2024-01-03	No	Mobile	0.5	No	No	12	Always	Yes	Yes	No	Yes	SA	Geology	S	25	15	32	53	No	Under-7	M	DD	Moderate	Yes	Yes	65	20.8467	59.8581	689.522	61.7039	969.425
Male	21	Non Government	No	No	Mid	Mobile Data	4G	2024-01-03	No	Mobile	0.5	Yes	No	12	Always	No	Yes	No	No	SA	Mathematics	S	10	35	30	13	No	Above-7	L	DD	Moderate	Yes	Yes	63	19.2214	65.7404	501.265	37.3644	666.48
Female	24	Non Government	Yes	No	Mid	Mobile Data	3G	2024-03-06	Yes	Mobile	1	No	No	2	Always	Yes	Yes	Yes	No	JO	Neuroscience	S	87	65	82	33	Yes	Under-7	H	CB	Moderate	Yes	Yes	53	19.8343	60.2716	411.92	62.4064	661.505
Male	20	Non Government	No	Yes	Mid	Wifi	4G	2024-01-03	No	Mobile	0.75	No	No	0	Never	No	No	Yes	Yes	UAE	Neuroscience	S	85	15	22	53	Yes	Under-7	M	CC	Low	Yes	Yes	66	20.9515	43.28	852.332	66.6724	700.004
Female	21	Government	No	Yes	Rich	Wifi	4G	2024-01-03	No	Mobile	0.5	No	Yes	2	Always	Yes	No	No	Yes	UAE	Geology	S	80	71	52	51	Yes	Under-7	M	DC	Moderate	Yes	Yes	59	19.9282	59.7777	782.601	89.8621	818.455
Male	24	Government	Yes	Yes	Mid	Wifi	4G	0	No	Computer	0.75	No	Yes	0	Always	Yes	Yes	No	Yes	OM	Neuroscience	S	75	71	72	53	Yes	Under-7	H	DC	Low	Yes	Yes	80	20.2388	36.0792	389.13	88.5115	620.57
Male	19	Non Government	No	Yes	Rich	Mobile Data	3G	2024-01-03	No	Mobile	0.5	No	No	0	Always	Yes	No	No	No	OM	Statistics	S	85	66	12	23	No	Under-7	M	DC	Moderate	Yes	Yes	68	21.4211	35.2127	192.717	87.9838	918.332
Female	20	Non Government	No	No	Mid	Wifi	4G	2024-01-03	No	Mobile	0.5	No	Yes	0	Sometimes	No	No	Yes	Yes	JO	Astronomy	S	23	25	32	53	No	Under-7	L	DC	Low	Yes	Yes	73	20.0805	43.8251	164.627	50.9033	417.569
Female	18	Government	No	No	Mid	Wifi	4G	2024-01-03	No	Mobile	1	Yes	Yes	0	Always	No	Yes	Yes	No	LEB	Chemistry	S	15	25	37	13	Yes	Above-7	L	DC	Low	Yes	Yes	60	28.7612	62.3081	184.848	89.476	663.859
Female	22	Non Government	No	Yes	Mid	Wifi	4G	2024-01-03	No	Mobile	0.5	No	No	0	Always	Yes	No	No	No	SA	Chemistry	S	95	91	62	53	Yes	Under-7	M	DD	Low	Yes	Yes	65	18.9628	39.8539	624.582	57.3287	706.595
Male	21	Non Government	Yes	Yes	Mid	Wifi	4G	2024-01-03	No	Computer	None	Yes	No	0	Always	No	Yes	No	No	SA	Statistics	S	81	75	62	53	No	Under-7	M	CB	Moderate	Yes	Yes	83	24.2941	32.5301	146.496	81.1102	764.219
Female	20	Government	No	Yes	Mid	Wifi	4G	2024-01-03	Yes	Mobile	0.5	No	No	0	Always	Yes	No	No	No	SA	Geology	S	53	75	72	23	No	Under-7	M	DC	Low	Yes	Yes	78	22.9248	35.2684	403.234	42.9792	565.643
Male	19	Government	No	No	Mid	Mobile Data	4G	0	No	Mobile	1	Yes	Yes	0	Sometimes	No	No	No	Yes	JO	Astronomy	S	15	43	42	33	Yes	Under-7	M	CC	Moderate	Yes	Yes	52	29.7885	64.3498	777.88	60.35	656.488
Male	20	Non Government	Yes	No	Mid	Mobile Data	3G	2024-01-03	Yes	Computer	0.75	No	Yes	0	Sometimes	No	No	No	No	JO	Environmental Science	S	92	65	62	53	Yes	Under-7	H	DD	Moderate	Yes	Yes	65	19.3445	55.3513	364.913	87.9607	690.723
Male	22	Non Government	No	Yes	Poor	Mobile Data	4G	2024-01-03	No	Mobile	0.75	Yes	No	0	Always	No	No	Yes	No	LEB	Computer Science	S	83	75	62	53	No	Under-7	H	DC	Low	Yes	Yes	65	22.7743	40.128	786.977	86.8219	812.146
Female	24	Non Government	No	Yes	Poor	Mobile Data	4G	2024-01-03	No	Mobile	0.75	No	Yes	0	Never	No	No	No	Yes	LEB	Computer Science	S	27	15	42	53	No	Above-7	L	DD	Moderate	Yes	Yes	88	29.6336	52.2118	770.92	71.0241	864.127
Male	18	Non Government	Yes	Yes	Mid	Mobile Data	4G	2024-01-03	No	Mobile	0.5	No	No	0	Never	No	No	No	Yes	OM	Physics	S	45	95	12	13	No	Under-7	M	DD	Moderate	Yes	Yes	57	28.3861	51.1032	321.244	77.8689	842.696
Male	24	Non Government	Yes	Yes	Mid	Wifi	4G	2024-03-06	No	Computer	0.75	No	No	0	Sometimes	No	Yes	Yes	Yes	UAE	Materials Science	S	15	90	52	83	Yes	Under-7	H	DC	Low	Yes	Yes	69	27.8049	56.2174	755.94	40.5856	604.95
Female	20	Non Government	No	Yes	Poor	Mobile Data	3G	2024-01-03	No	Mobile	0.75	No	No	2	Always	No	No	Yes	Yes	OM	Astronomy	S	45	58	52	43	Yes	Under-7	H	DD	High	Yes	Yes	85	21.0948	39.3275	772.999	73.2995	999.67
Female	18	Non Government	No	No	Mid	Wifi	4G	2024-01-03	No	Mobile	0.5	No	No	0	Always	No	No	Yes	Yes	UAE	English	S	25	5	12	33	Yes	Under-7	M	DD	Moderate	Yes	Yes	75	20.0507	64.5761	457.709	67.083	909.199
Male	24	Non Government	No	Yes	Mid	Wifi	4G	2024-01-03	Yes	Mobile	0.75	No	No	12	Always	No	Yes	Yes	No	OM	Statistics	S	22	51	42	40	Yes	Under-7	M	DD	Moderate	Yes	Yes	63	26.0237	42.3747	289.378	35.4931	556.014
Male	19	Government	No	No	Poor	Mobile Data	3G	0	No	Mobile	0.5	No	No	0	Sometimes	No	Yes	No	Yes	KW	Neuroscience	S	29	10	12	24	No	Above-7	L	BB	Low	Yes	Yes	74	29.1525	57.7653	569.144	36.7895	517.063
Female	19	Non Government	No	No	Mid	Wifi	4G	2024-01-03	No	Mobile	0.75	Yes	Yes	0	Always	Yes	No	No	No	JO	Engineering	S	72	51	42	24	Yes	Above-7	H	DD	Low	Yes	Yes	63	24.6812	30.645	929.258	36.5066	588.413
Male	21	Government	No	Yes	Mid	Wifi	4G	2024-01-03	No	Mobile	0.75	No	Yes	0	Always	No	No	No	Yes	LEB	Geology	S	67	31	42	14	Yes	Under-7	M	DD	Moderate	Yes	Yes	60	24.8594	44.9063	675.655	73.4614	671.407
Male	20	Non Government	Yes	Yes	Poor	Wifi	3G	2024-03-06	No	Mobile	0.75	Yes	Yes	0	Always	No	Yes	Yes	No	JO	Mathematics	S	17	21	42	14	Yes	Under-7	M	DC	Low	Yes	Yes	98	21.3597	44.0684	255.63	38.5029	910.48
Male	18	Government	No	Yes	Mid	Wifi	4G	2024-01-03	No	Mobile	1	No	Yes	2	Sometimes	Yes	Yes	No	Yes	SA	Environmental Science	S	27	41	49	14	No	Under-7	M	DC	Moderate	Yes	Yes	69	27.2339	51.7394	714.481	58.0639	867.017
Male	19	Non Government	Yes	Yes	Poor	Wifi	4G	2024-01-03	Yes	Computer	0.5	No	Yes	0	Sometimes	No	Yes	No	Yes	JO	Geology	S	70	81	39	84	No	Under-7	M	DD	High	Yes	Yes	78	20.2445	32.9095	484.483	51.4189	910.748
Male	24	Non Government	Yes	Yes	Mid	Wifi	4G	2024-03-06	No	Computer	0.5	No	No	2	Never	No	Yes	No	Yes	JO	Chemistry	S	27	90	82	14	Yes	Under-7	H	BA	Moderate	Yes	Yes	53	21.8842	61.6053	632.376	63.0302	563.174
Male	19	Non Government	Yes	Yes	Mid	Mobile Data	3G	2024-01-03	No	Mobile	1	No	Yes	0	Always	No	No	Yes	Yes	SA	Materials Science	S	17	61	42	14	No	Under-7	M	BA	Moderate	Yes	Yes	74	23.1052	38.7112	760.658	72.3886	756.077
Male	23	Non Government	Yes	Yes	Mid	Wifi	4G	2024-03-06	Yes	Computer	0.5	Yes	No	0	3	No	Yes	Yes	Yes	JO	Geology	S	87	81	42	19	Yes	Under-7	H	BA	Moderate	Yes	Yes	63	24.0913	57.0815	563.453	71.0834	569.949
Female	24	Non Government	No	Yes	Mid	Wifi	4G	2024-01-03	No	Mobile	0.5	No	No	0	Never	No	Yes	No	Yes	OM	Statistics	S	7	61	22	14	No	Above-7	L	AA	Moderate	Yes	Yes	70	20.9089	62.1285	832.586	60.9312	465.414
Male	19	Non Government	Yes	Yes	Mid	Mobile Data	3G	2024-03-06	Yes	Mobile	1	Yes	Yes	8	Always	Yes	Yes	Yes	Yes	OM	Mathematics	S	17	50	2	4	No	Above-7	L	BA	Low	Yes	Yes	74	19.378	52.4751	749.94	57.8601	810.519
Female	22	Non Government	No	Yes	Mid	Mobile Data	4G	2024-03-06	No	Mobile	1	Yes	No	0	Always	Yes	Yes	Yes	Yes	OM	Geology	S	5	21	42	14	No	Above-7	L	AA	Moderate	Yes	Yes	60	25.3274	59.6353	653.566	53.8689	485.799
Female	23	Government	No	No	Mid	Mobile Data	3G	0	No	Mobile	1	No	No	0	Always	Yes	Yes	Yes	No	JO	Chemistry	S	27	41	32	61	Yes	Above-7	M	AA	Low	Yes	Yes	69	21.4636	56.4744	235.714	81.7146	800.619
Male	18	Non Government	Yes	Yes	Mid	Wifi	3G	2024-03-06	Yes	Computer	0.5	No	Yes	0	Always	No	Yes	No	Yes	SA	Computer Science	S	87	88	40	10	Yes	Under-7	M	AA	Low	Yes	Yes	72	24.9749	44.2212	852.354	49.8511	788.779
Female	23	Non Government	No	Yes	Mid	Mobile Data	4G	2024-01-03	No	Mobile	1	No	Yes	0	Never	No	Yes	No	No	OM	Neuroscience	S	96	61	42	94	Yes	Under-7	H	AA	Moderate	Yes	Yes	63	19.8524	62.3543	942.315	45.5619	886.149
Female	24	Non Government	No	Yes	Mid	Wifi	4G	2024-01-03	No	Mobile	0.75	No	Yes	0	Always	No	No	Yes	Yes	KW	Materials Science	S	57	51	46	34	Yes	Under-7	M	BA	Low	Yes	Yes	83	23.7737	41.7881	223.269	74.5989	483.733
Female	22	Non Government	No	Yes	Mid	Mobile Data	4G	2024-01-03	No	Mobile	0.5	Yes	Yes	2	Sometimes	No	No	Yes	Yes	KW	Statistics	S	77	69	41	13	Yes	Under-7	M	AA	Moderate	Yes	Yes	63	24.3911	52.8485	539.417	51.5858	870.088
Female	19	Government	No	No	Mid	Mobile Data	4G	2024-01-03	No	Mobile	0.5	Yes	Yes	0	Sometimes	Yes	Yes	Yes	No	LEB	Biology	S	80	51	40	24	No	Under-7	M	Fail	Low	No	No	67	18.6219	59.8159	333	80.8199	999.566
Female	21	Government	No	No	Mid	Mobile Data	3G	2024-01-03	No	Mobile	1	No	Yes	0	Always	Yes	No	Yes	Yes	KW	Astronomy	S	62	61	82	40	Yes	Under-7	M	BA	Low	Yes	Yes	58	22.0393	45.1582	779.071	49.6733	910.625
Female	19	Government	No	Yes	Rich	Mobile Data	4G	2024-01-03	Yes	Mobile	0.5	No	No	12	Always	Yes	No	No	No	JO	Astronomy	S	72	83	12	90	Yes	Under-7	H	AA	Low	Yes	Yes	53	19.613	42.1107	749.467	72.1167	851.087
Female	19	Non Government	No	Yes	Poor	Mobile Data	3G	2024-01-03	No	Mobile	0.75	Yes	Yes	0	Always	No	No	Yes	Yes	OM	Geology	S	87	81	22	70	Yes	Under-7	H	BB	Low	Yes	Yes	73	18.7605	48.3738	226.797	32.7065	797.299
Female	20	Non Government	Yes	No	Mid	Wifi	4G	2024-01-03	Yes	Computer	1	Yes	Yes	0	Always	No	Yes	Yes	No	OM	Biology	S	72	90	12	30	No	Under-7	M	BA	Moderate	Yes	Yes	59	29.8795	62.7185	889.325	53.1338	653.069
Female	24	Non Government	No	Yes	Mid	Wifi	4G	2024-03-06	No	Mobile	0.75	Yes	Yes	12	Sometimes	No	Yes	6	Yes	LEB	Mathematics	S	2	11	62	30	No	Under-7	L	BB	Moderate	Yes	Yes	64	21.8682	67.1969	262.876	50.5938	838.3
Female	21	Non Government	No	Yes	Poor	Mobile Data	4G	2024-01-03	No	Mobile	0.75	No	No	0	Never	No	No	No	Yes	SA	Statistics	S	5	3	2	10	Yes	Under-7	L	AA	Moderate	Yes	Yes	63	27.7185	51.8033	817.533	79.0007	834.507
Male	24	Non Government	No	Yes	Mid	Mobile Data	3G	2024-01-03	Yes	Mobile	0.75	No	Yes	0	Never	No	No	No	Yes	JO	Materials Science	S	73	84	77	81	Yes	Above-7	H	Fail	Moderate	No	No	68	21.0557	56.4586	511.282	88.0233	778.899
Male	19	Government	Yes	Yes	Mid	Mobile Data	4G	2024-01-03	No	Mobile	0.5	Yes	Yes	0	Always	Yes	Yes	Yes	No	OM	Astronomy	S	5	17	21	10	No	Above-7	L	BB	Moderate	Yes	Yes	84	26.178	66.1309	395.445	57.6529	877.767
Male	20	Government	No	Yes	Mid	Wifi	4G	2024-01-03	No	Mobile	0.5	Yes	Yes	0	Always	Yes	Yes	No	No	OM	English	S	51	42	12	29	No	Above-7	M	AA	Low	Yes	Yes	74	27.1227	33.9419	242.415	79.4902	669.258
Male	24	Government	Yes	No	Poor	Mobile Data	4G	0	No	Mobile	1	No	Yes	0	Sometimes	No	Yes	Yes	Yes	JO	Geology	S	9	7	21	20	Yes	Above-7	L	CB	Low	Yes	Yes	83	25.1477	39.2831	250.853	71.9817	472.752
Male	23	Government	Yes	Yes	Mid	Mobile Data	4G	2024-01-03	Yes	Mobile	1	No	Yes	0	Always	No	Yes	No	No	KW	Physics	F	19	72	15	50	Yes	Above-7	M	BB	Low	Yes	Yes	60	23.6589	58.356	695.701	88.0432	735.441
Male	19	Non Government	No	Yes	Poor	Mobile Data	4G	2024-01-03	No	Mobile	1	No	No	0	Always	Yes	Yes	Yes	Yes	SA	Neuroscience	S	32	80	58	46	Yes	Above-7	M	BB	Moderate	Yes	Yes	94	22.9421	62.9498	595.387	78.6665	559.026
Female	21	Government	No	Yes	Mid	Wifi	4G	0	No	Mobile	0.75	No	Yes	0	Sometimes	No	Yes	Yes	Yes	OM	Statistics	S	32	60	58	66	Yes	Above-7	M	AA	Low	Yes	Yes	73	22.1864	64.2812	209.877	34.6487	630.66
Female	23	Non Government	No	No	Mid	Mobile Data	3G	0	No	Mobile	0.5	Yes	Yes	0	Never	No	No	Yes	Yes	LEB	Geology	S	12	8	18	26	No	Above-7	L	BA	Low	Yes	Yes	75	29.1543	46.6043	201.428	72.7969	410.449
Female	24	Non Government	No	Yes	Rich	Wifi	3G	2024-01-03	No	Mobile	0.5	Yes	Yes	0	Sometimes	No	No	Yes	No	UAE	Environmental Science	S	52	10	13	6	No	Above-7	L	Fail	High	No	No	77	27.9674	33.5736	165.08	62.13	629.674
Female	23	Government	No	Yes	Mid	Mobile Data	4G	0	No	Mobile	1	No	Yes	0	Always	Yes	No	No	Yes	JO	Materials Science	S	72	80	58	66	Yes	Above-7	M	BA	Low	Yes	Yes	83	29.5803	47.5113	769.391	30.9862	885.281
Male	22	Non Government	No	Yes	Mid	Mobile Data	3G	2024-01-03	No	Mobile	0.75	Yes	Yes	12	Sometimes	No	No	Yes	Yes	LEB	Mathematics	S	72	80	58	66	Yes	Above-7	M	Fail	Moderate	No	No	67	19.4916	39.2294	740.694	45.0788	725.633
Male	22	Government	Yes	Yes	Mid	Mobile Data	3G	2024-01-03	Yes	Mobile	0.75	Yes	No	2	Sometimes	No	No	Yes	Yes	SA	Geology	S	92	80	88	76	Yes	Under-7	H	Fail	Moderate	No	No	68	26.7704	41.6479	152.588	85.3053	405.88
Female	24	Non Government	No	Yes	Mid	Mobile Data	4G	2024-01-03	No	Mobile	0.5	Yes	Yes	0	Always	No	Yes	No	Yes	JO	Materials Science	S	72	80	98	96	Yes	Under-7	H	CC	Moderate	Yes	Yes	67	29.2601	60.8907	604.243	85.5637	681.906
Female	24	Government	No	No	Mid	Mobile Data	4G	2024-01-03	No	Mobile	0.75	No	No	0	Never	No	Yes	Yes	No	UAE	English	S	72	80	58	86	Yes	Under-7	M	CC	Moderate	Yes	Yes	68	20.1748	33.0211	176.209	77.931	574.871
Male	21	Non Government	Yes	No	Poor	Mobile Data	3G	2024-03-06	Yes	Mobile	0.75	No	No	0	Always	Yes	No	No	No	JO	Environmental Science	S	22	20	18	6	No	Above-7	L	AA	Moderate	Yes	Yes	54	18.798	63.1032	913.371	88.9068	686.53
Female	22	Non Government	No	Yes	Poor	Mobile Data	3G	2024-01-03	No	Mobile	0.75	Yes	Yes	12	Sometimes	No	Yes	No	Yes	KW	Mathematics	S	12	20	38	46	No	Above-7	M	CB	Low	Yes	Yes	51	26.8934	47.1068	916.406	78.3927	642.816
Female	21	Non Government	No	Yes	Mid	Wifi	4G	2024-01-03	No	Mobile	1	No	No	12	Always	Yes	No	Yes	No	KW	Chemistry	S	70	92	83	85	Yes	Under-7	H	BB	Low	Yes	Yes	73	24.8937	53.8426	728.41	30.6123	959.188
Male	21	Government	No	Yes	Mid	Wifi	4G	2024-01-03	No	Mobile	0.5	Yes	No	0	Always	Yes	Yes	No	No	SA	Chemistry	S	50	40	52	66	Yes	Under-7	M	AA	Moderate	Yes	Yes	57	28.1019	33.5861	933.57	47.2701	424.706
Female	19	Non Government	Yes	No	Mid	Mobile Data	3G	2024-03-06	Yes	Mobile	0.5	Yes	No	0	Always	Yes	No	Yes	Yes	UAE	Chemistry	S	80	94	62	77	Yes	Under-7	H	AA	Moderate	Yes	Yes	72	19.6773	43.4944	830.308	31.8375	810.153
Female	20	Non Government	Yes	Yes	Mid	Mobile Data	3G	2024-01-03	No	Mobile	0.5	No	No	2	Never	No	No	No	Yes	SA	Computer Science	S	87	48	82	96	No	Above-7	M	AA	Moderate	Yes	Yes	70	27.5432	33.588	845.685	35.6465	910.616
Male	21	Non Government	No	Yes	Poor	Mobile Data	3G	2024-01-03	No	Mobile	0.5	Yes	No	2	Always	No	Yes	No	No	UAE	Environmental Science	S	70	40	2	16	No	Above-7	L	AA	Low	Yes	Yes	63	20.4195	68.4617	612.737	43.1304	975.543
Female	22	Non Government	No	Yes	Poor	Mobile Data	4G	2024-01-03	No	Mobile	0.5	No	No	12	Always	Yes	No	Yes	Yes	LEB	Geology	S	65	86	62	40	No	Above-7	M	AA	Moderate	Yes	Yes	50	19.9639	62.2905	375.453	60.2135	506.582
Female	23	Non Government	Yes	Yes	Mid	Wifi	3G	2024-03-06	Yes	Mobile	0.5	No	No	2	Always	Yes	No	Yes	Yes	JO	Engineering	S	15	6	32	40	Yes	Under-7	H	BA	Moderate	Yes	Yes	58	19.9712	48.3853	296.019	80.8519	718.783
Female	18	Non Government	Yes	No	Poor	Mobile Data	3G	2024-01-03	Yes	Mobile	0.75	No	No	0	Always	No	Yes	Yes	Yes	LEB	Astronomy	S	19	74	32	17	No	Above-7	L	CC	Moderate	Yes	Yes	61	27.7749	38.9441	394.48	81.718	426.154
Female	23	Non Government	No	Yes	Mid	Mobile Data	4G	2024-01-03	No	Mobile	0.5	Yes	Yes	2	Sometimes	No	Yes	Yes	Yes	KW	Geology	S	69	76	82	94	No	Under-7	M	BA	Moderate	Yes	Yes	95	25.9824	67.3382	665.646	66.9721	699.51
Male	18	Non Government	Yes	Yes	Poor	Wifi	4G	2024-01-03	Yes	Computer	0.5	No	Yes	0	Always	No	No	No	Yes	UAE	Statistics	S	39	26	12	44	No	Above-7	L	CC	High	Yes	Yes	70	24.2768	43.7839	255.391	85.6906	475.275
Female	19	Non Government	No	Yes	Poor	Mobile Data	4G	2024-01-03	No	Mobile	0.5	No	No	12	Never	No	Yes	No	No	KW	Geology	S	59	97	42	70	Yes	Under-7	H	Fail	Moderate	No	No	68	22.306	36.4394	332.776	60.0037	902.738
Male	18	Non Government	No	Yes	Rich	Wifi	4G	2024-01-03	No	Mobile	0.5	No	No	12	Sometimes	No	No	No	Yes	SA	Physics	S	10	17	12	40	Yes	Under-7	H	BA	High	Yes	Yes	64	28.5264	52.5266	521.255	83.3422	468.322
Female	23	Non Government	No	Yes	Mid	Mobile Data	4G	0	No	Mobile	0.75	Yes	Yes	8	Sometimes	No	Yes	No	Yes	JO	Materials Science	S	80	87	72	60	No	Under-7	H	Fail	Low	No	No	58	22.7093	67.751	309.745	57.2439	707.973
Male	24	Non Government	Yes	Yes	Mid	Wifi	4G	2024-01-03	No	Computer	0.75	No	No	0	Always	Yes	No	No	No	SA	Geology	S	70	99	66	65	No	Under-7	M	Fail	Moderate	No	No	68	27.7992	30.1532	629.779	46.6335	712.658
Female	20	Non Government	No	Yes	Mid	Mobile Data	4G	2024-01-03	No	Mobile	1	No	No	0	Always	Yes	No	No	Yes	UAE	Environmental Science	S	80	97	86	95	Yes	Under-7	M	AA	Moderate	Yes	Yes	62	23.2696	39.525	930.858	84.9848	982.99
Male	18	Government	No	No	Poor	Mobile Data	4G	0	No	Mobile	0.75	Yes	Yes	12	Never	No	No	Yes	Yes	OM	Mathematics	S	69	34	12	17	No	Above-7	L	BA	Low	Yes	Yes	98	22.5233	67.5379	773.28	53.2761	792.988
Male	18	Government	Yes	Yes	Mid	Wifi	4G	2024-01-03	Yes	Tab	0.5	No	No	0	Always	No	Yes	No	Yes	JO	Geology	S	10	17	12	14	No	Above-7	L	BA	Moderate	Yes	Yes	66	23.5522	36.8434	699.784	60.2042	572.704
Male	22	Non Government	Yes	Yes	Poor	Mobile Data	4G	2024-01-03	No	Mobile	1	No	Yes	0	Always	Yes	No	No	No	JO	Statistics	S	61	97	82	64	Yes	Above-7	M	AA	Moderate	Yes	Yes	78	21.6165	34.5297	624.449	49.7316	544.48
Male	22	Non Government	Yes	Yes	Mid	Wifi	4G	2024-01-03	No	Mobile	0.5	No	No	0	Always	Yes	No	No	Yes	JO	Engineering	S	21	27	52	34	Yes	Above-7	M	BA	Low	Yes	Yes	60	26.9713	52.8075	539.153	69.7703	476.949
Female	18	Non Government	Yes	Yes	Mid	Mobile Data	3G	2024-01-03	No	Mobile	0.75	No	No	12	Always	Yes	No	No	No	OM	Chemistry	S	49	94	42	7	No	Above-7	M	BA	Low	Yes	Yes	65	24.0326	64.4738	267.907	89.7019	853.909
Female	21	Government	No	No	Mid	Mobile Data	3G	2024-01-03	No	Mobile	0.5	No	No	2	Sometimes	No	No	Yes	No	SA	Environmental Science	F	70	64	42	32	No	Under-7	M	BB	Moderate	Yes	Yes	63	20.7866	49.0844	905.239	31.5308	814.454
Male	20	Government	No	Yes	Mid	Wifi	4G	0	No	Mobile	1	Yes	No	0	Never	No	No	Yes	No	SA	Physics	S	79	84	82	37	No	Under-7	H	AA	Low	Yes	Yes	80	28.7949	69.7826	323.682	83.9909	765.926
Male	19	Government	No	Yes	Mid	Wifi	3G	2024-01-03	Yes	Mobile	1	No	No	0	Never	No	No	No	No	LEB	Mathematics	F	19	80	12	17	Yes	Above-7	M	AA	Moderate	Yes	Yes	82	22.6067	57.1669	182.178	30.2356	424.504
Male	22	Government	No	Yes	Mid	Wifi	4G	2024-01-03	No	Mobile	0.5	Yes	No	0	Always	Yes	Yes	Yes	No	JO	Neuroscience	S	11	70	32	29	Yes	Above-7	M	BB	Moderate	Yes	Yes	78	24.5226	32.963	775.014	51.8537	857.697
Male	19	Non Government	No	Yes	Poor	Mobile Data	4G	2024-01-03	Yes	Mobile	0.25	Yes	Yes	12	Always	Yes	Yes	No	No	JO	Biology	F	10	8	10	10	Yes	Above-7	M	AA	High	Yes	Yes	73	28.8777	69.7133	258.054	40.1164	785.133
Male	22	Non Government	Yes	No	Poor	Mobile Data	3G	2024-03-06	Yes	Mobile	0.5	No	No	2	Always	Yes	No	Yes	No	UAE	Environmental Science	S	18	28	40	20	Yes	Above-7	M	BA	Moderate	Yes	Yes	68	25.4909	46.3158	434.706	75.4405	978.333
Female	24	Non Government	No	Yes	Mid	Mobile Data	4G	2024-01-03	No	Mobile	0.5	No	No	0	Always	No	Yes	No	No	SA	Mathematics	F	90	84	52	30	No	Under-7	H	BB	Moderate	Yes	Yes	69	19.4028	41.4961	125.456	33.0367	752.321
Male	24	Government	No	No	Mid	Mobile Data	4G	0	No	Mobile	0.5	No	Yes	0	Always	Yes	Yes	No	No	UAE	Mathematics	S	92	81	32	36	No	Under-7	M	AA	Moderate	Yes	Yes	72	29.278	52.3152	223.361	63.2091	582.371
Male	21	Non Government	No	Yes	Mid	Wifi	4G	2024-01-03	No	Mobile	0.5	Yes	No	0	Always	Yes	Yes	Yes	No	JO	Neuroscience	F	42	21	2	16	No	Under-7	M	AA	Moderate	Yes	Yes	78	25.5325	42.1723	255.883	47.6956	628.912
Male	19	Government	No	No	Mid	Mobile Data	3G	2024-01-03	No	Mobile	0.5	No	No	0	Never	No	No	No	No	JO	Computer Science	S	22	20	6	26	No	Under-7	H	BB	Low	Yes	Yes	75	22.0189	33.4583	148.969	38.0202	505.504
Female	24	Non Government	No	Yes	Mid	Wifi	2G	2024-03-06	No	Mobile	0.75	No	No	0	Never	No	No	Yes	Yes	LEB	Materials Science	F	95	82	82	70	Yes	Under-7	H	CC	Moderate	Yes	Yes	63	19.6713	30.0571	690.991	76.3091	833.749
Male	18	Non Government	No	Yes	Mid	Wifi	4G	0	No	Mobile	1	Yes	Yes	0	Always	No	Yes	Yes	No	JO	Chemistry	S	90	62	80	60	Yes	Under-7	H	CC	Low	Yes	Yes	67	27.5283	47.9833	853.307	43.045	824.633
Male	19	Government	No	Yes	Mid	Wifi	3G	2024-01-03	Yes	Computer	0.5	Yes	No	0	Always	No	Yes	No	No	UAE	Statistics	F	72	21	22	26	Yes	Under-7	H	BB	Moderate	Yes	Yes	60	25.4409	63.4745	435.984	43.4205	520.39
Male	21	Government	Yes	Yes	Mid	Wifi	3G	2024-01-03	No	Mobile	0.5	No	No	2	Always	Yes	No	No	Yes	SA	Environmental Science	S	92	31	42	27	Yes	Under-7	H	AA	Low	Yes	Yes	73	24.4015	52.8926	887.119	46.5046	495.094
Female	21	Non Government	No	Yes	Mid	Mobile Data	4G	2024-01-03	No	Mobile	0.5	Yes	No	0	Always	Yes	Yes	No	No	UAE	Engineering	F	82	31	52	25	No	Under-7	M	BA	Moderate	Yes	Yes	64	28.7267	69.9683	292.012	65.206	446.203
Male	19	Government	No	No	Mid	Mobile Data	4G	0	No	Mobile	0.5	No	No	2	Always	Yes	No	Yes	No	JO	Geology	S	72	41	46	27	No	Under-7	M	BA	Low	Yes	Yes	55	27.4632	41.4739	392.851	69.58	947.185
Male	24	Government	No	No	Mid	Wifi	4G	2024-01-03	No	Mobile	0.75	No	No	12	Always	Yes	Yes	No	No	OM	Engineering	F	74	71	56	37	No	Under-7	H	AA	Low	Yes	Yes	72	19.8201	41.2182	235.663	31.0562	539.842
Female	22	Government	No	No	Mid	Wifi	4G	2024-01-03	No	Mobile	0.75	Yes	No	12	Always	Yes	Yes	Yes	Yes	KW	English	S	74	60	56	37	No	Under-7	H	BA	Low	Yes	Yes	68	21.7407	36.39	658.503	44.5122	606.498
Female	23	Non Government	Yes	Yes	Rich	Wifi	4G	2024-03-06	No	Computer	0.5	Yes	Yes	2	Sometimes	No	No	Yes	Yes	JO	Geology	F	95	94	72	80	No	Under-7	H	AA	Moderate	Yes	Yes	72	20.9819	36.5625	477.883	55.8583	568.303
Female	22	Non Government	Yes	Yes	Mid	Mobile Data	3G	2024-01-03	No	Mobile	1	No	No	0	Always	Yes	No	Yes	Yes	LEB	Neuroscience	S	97	87	82	86	No	Under-7	H	BA	Low	Yes	Yes	55	26.9274	41.4075	651.955	49.9186	648.175
Male	21	Non Government	Yes	Yes	Mid	Wifi	4G	2024-01-03	No	Computer	0.5	No	No	0	Always	No	Yes	Yes	Yes	OM	Materials Science	F	40	38	32	36	No	Above-7	M	AA	Moderate	Yes	Yes	59	18.4024	61.7136	785.507	83.0502	828.429
Male	20	Non Government	No	Yes	Mid	Mobile Data	3G	2024-01-03	No	Mobile	0.5	No	No	2	Always	Yes	No	Yes	Yes	UAE	Computer Science	S	41	39	35	39	Yes	Above-7	M	AA	Moderate	Yes	Yes	64	24.8387	66.2303	591.133	77.2625	922.357
Female	18	Non Government	No	Yes	Mid	Wifi	4G	0	No	Mobile	0.5	Yes	No	2	Always	No	Yes	No	Yes	KW	Materials Science	F	51	79	85	89	Yes	Under-7	H	AA	Low	Yes	Yes	63	27.1495	69.0035	664.867	67.5534	509.559
Female	23	Non Government	No	Yes	Mid	Mobile Data	4G	2024-01-03	No	Mobile	0.5	No	Yes	0	Never	No	Yes	No	Yes	JO	Environmental Science	S	81	79	91	85	Yes	Under-7	H	AA	Moderate	Yes	Yes	97	28.5212	39.2916	941.725	50.2825	811.847
Male	22	Government	Yes	Yes	Mid	Wifi	4G	0	No	Mobile	0.5	No	No	0	Always	Yes	No	Yes	No	UAE	Statistics	F	71	70	65	69	Yes	Under-7	M	CB	Moderate	Yes	Yes	59	22.105	65.2519	369.158	72.0403	611.537
Female	23	Non Government	No	Yes	Mid	Wifi	4G	2024-03-06	No	Mobile	0.5	No	No	0	Always	Yes	Yes	Yes	Yes	JO	Computer Science	S	75	71	76	80	Yes	Under-7	M	AA	High	Yes	Yes	68	27.8551	43.1302	423.248	80.6183	988.316
Male	20	Non Government	No	Yes	Mid	Mobile Data	4G	2024-01-03	No	Mobile	0.5	No	No	8	Always	Yes	No	Yes	No	JO	Physics	F	49	36	32	44	No	Above-7	L	BB	Moderate	Yes	Yes	72	19.3276	34.5136	745.933	65.6898	579.351
Female	19	Non Government	No	Yes	Mid	Wifi	4G	2024-03-06	No	Computer	0.5	No	No	0	Always	Yes	Yes	No	No	OM	Environmental Science	S	42	24	12	24	No	Above-7	L	CC	Moderate	Yes	Yes	53	28.1574	64.801	650.175	77.0677	404.316
Female	23	Non Government	Yes	No	Poor	Wifi	2G	2024-03-06	Yes	Tab	0.5	No	No	0	Always	No	Yes	Yes	Yes	LEB	Mathematics	F	90	86	82	74	Yes	Under-7	H	BB	Low	Yes	Yes	78	19.5299	55.4442	260.68	74.9463	709.384
Female	20	Non Government	No	Yes	Mid	Wifi	4G	2024-01-03	No	Mobile	0.5	No	Yes	0	Always	No	No	Yes	No	SA	Environmental Science	S	62	64	72	84	Yes	Under-7	H	AA	Low	Yes	Yes	53	22.7674	36.5892	438.533	64.3042	490.439
Male	19	Non Government	Yes	Yes	Poor	Wifi	3G	2024-03-06	No	Mobile	0.75	No	No	2	Never	Yes	No	Yes	Yes	SA	English	F	90	86	82	74	Yes	Above-7	M	BA	Low	Yes	Yes	68	27.5675	47.1933	521.054	48.731	426.697
Female	19	Non Government	No	Yes	Mid	Wifi	4G	2024-03-06	No	Mobile	0.5	No	No	2	Sometimes	Yes	Yes	Yes	Yes	LEB	Neuroscience	S	62	64	72	84	Yes	Above-7	M	AA	Moderate	Yes	Yes	66	19.799	41.4903	477.451	74.7469	818.962
Male	24	Non Government	No	Yes	Mid	Mobile Data	3G	2024-01-03	No	Mobile	0.5	Yes	Yes	0	Always	Yes	Yes	No	No	UAE	Neuroscience	F	98	87	86	84	No	Under-7	H	CB	Moderate	Yes	Yes	61	20.751	59.4718	260.447	42.4078	839.356
Female	24	Government	No	Yes	Mid	Wifi	4G	0	No	Mobile	0.5	Yes	No	2	Always	Yes	Yes	Yes	No	UAE	Astronomy	S	72	74	82	89	No	Under-7	H	AA	Low	Yes	Yes	64	26.667	48.1366	931.987	76.7693	676.419
Female	23	Non Government	No	Yes	Poor	Mobile Data	3G	2024-01-03	No	Mobile	0.5	No	Yes	2	Always	Yes	Yes	Yes	No	LEB	Neuroscience	F	18	17	26	34	No	Above-7	M	CC	Low	Yes	Yes	62	26.6404	69.5712	786.087	78.2728	806.131
Female	23	Non Government	No	Yes	Mid	Wifi	4G	2024-01-03	No	Mobile	0.5	No	No	12	Never	No	Yes	No	Yes	UAE	Astronomy	S	32	14	32	29	No	Above-7	M	BB	Moderate	Yes	Yes	57	25.6938	32.1898	533.22	79.3287	722.944
Male	23	Non Government	Yes	No	Mid	Wifi	4G	2024-03-06	Yes	Computer	0.5	Yes	No	8	Always	No	Yes	Yes	No	SA	Chemistry	F	10	12	20	13	No	Above-7	L	BB	Moderate	Yes	Yes	66	26.3274	44.2006	712.055	58.375	777.881
Female	19	Non Government	No	Yes	Mid	Mobile Data	3G	2024-01-03	No	Mobile	0.5	No	Yes	0	Always	Yes	Yes	Yes	No	JO	Statistics	S	22	34	15	9	No	Above-7	L	CC	Moderate	Yes	Yes	53	24.5127	49.276	907.554	41.5488	758.022
Male	18	Non Government	No	Yes	Mid	Mobile Data	4G	2024-01-03	No	Mobile	0.5	Yes	Yes	0	Always	Yes	Yes	No	No	KW	Geology	F	11	20	21	23	No	Under-7	M	CB	Low	Yes	Yes	95	21.0216	50.1253	222.557	35.9834	799.494
Male	21	Non Government	Yes	Yes	Mid	Wifi	4G	2024-01-03	No	Computer	0.5	No	No	12	Always	Yes	Yes	Yes	No	JO	Materials Science	S	12	44	25	39	No	Under-7	M	BB	Moderate	Yes	Yes	53	22.1484	42.6374	325.336	74.6017	519.778
Male	20	Non Government	No	No	Poor	Mobile Data	4G	2024-01-03	Yes	Mobile	0.5	No	Yes	0	Always	Yes	Yes	No	No	JO	Environmental Science	F	15	50	24	43	Yes	Under-7	M	CC	Low	Yes	Yes	63	20.1792	59.1696	588.431	83.1757	561.224
Male	20	Non Government	Yes	Yes	Mid	Wifi	4G	2024-01-03	No	Computer	0.5	No	No	12	Sometimes	Yes	6	Yes	No	LEB	Astronomy	S	32	44	29	89	Yes	Under-7	M	BA	Moderate	Yes	Yes	64	28.9014	64.9899	819.109	69.0503	663.978
Female	20	Non Government	No	Yes	Mid	Wifi	4G	2024-01-03	No	Mobile	0.5	No	Yes	2	Always	No	Yes	Yes	No	OM	Materials Science	F	65	59	74	83	Yes	Under-7	H	CC	Low	Yes	Yes	53	25.0007	67.5488	132.629	38.6496	667.677
Female	19	Government	No	No	Mid	Mobile Data	3G	2024-01-03	No	Mobile	0.5	No	No	0	Never	No	No	Yes	Yes	JO	English	S	72	64	59	89	Yes	Under-7	H	BB	Moderate	Yes	Yes	78	22.8102	62.2037	985.616	86.0938	864.647
Male	19	Non Government	No	Yes	Rich	Wifi	4G	2024-03-06	No	Mobile	0.75	No	No	2	Always	Yes	Yes	Yes	No	JO	Geology	F	95	57	74	89	Yes	Above-7	M	CC	High	Yes	Yes	72	23.5441	64.0232	509.416	89.3461	620.436
Female	18	Non Government	No	Yes	Mid	Wifi	4G	2024-03-06	No	Computer	1	No	No	0	Always	Yes	No	No	Yes	LEB	Materials Science	S	82	84	79	79	Yes	Above-7	M	BB	Moderate	Yes	Yes	68	29.3674	52.0218	423.308	56.0027	497.503
Female	24	Government	No	No	Poor	Mobile Data	4G	2024-01-03	No	Mobile	0.5	No	No	12	Always	Yes	No	No	No	KW	Materials Science	F	25	29	34	33	No	Above-7	M	BA	Low	Yes	Yes	64	19.8402	63.0355	363.452	65.6895	550.88
Male	20	Non Government	No	Yes	Mid	Mobile Data	4G	2024-01-03	No	Mobile	0.5	No	No	0	Always	Yes	No	No	No	OM	Chemistry	S	42	34	29	39	No	Above-7	M	CC	Moderate	Yes	Yes	59	25.0348	42.1402	256.921	76.6337	528.84
Female	22	Government	No	No	Mid	Mobile Data	3G	0	No	Mobile	0.5	Yes	Yes	12	Always	No	No	No	No	SA	Computer Science	F	55	79	44	43	Yes	Under-7	H	AA	Low	Yes	Yes	82	24.0707	45.9392	812.417	74.1834	838.996
Female	21	Non Government	No	No	Mid	Mobile Data	3G	0	No	Mobile	0.75	Yes	No	0	Always	Yes	No	Yes	No	LEB	Engineering	S	62	64	69	49	Yes	Under-7	H	CC	Low	Yes	Yes	58	25.3375	42.6765	959.873	88.0672	682.204
Male	24	Government	No	No	Mid	Mobile Data	4G	2024-01-03	No	Mobile	0.75	No	No	0	Always	Yes	No	No	Yes	UAE	Astronomy	F	78	88	74	83	Yes	Under-7	H	CC	Low	Yes	Yes	82	18.2173	48.6955	472.28	36.893	825.178
Female	21	Non Government	No	No	Mid	Mobile Data	3G	2024-01-03	No	Mobile	0.75	No	Yes	0	Always	Yes	Yes	Yes	Yes	UAE	Biology	S	72	84	89	89	Yes	Under-7	H	DD	Moderate	Yes	Yes	80	28.4655	41.4232	957.179	64.8435	649.732
Male	20	Non Government	Yes	Yes	Mid	Mobile Data	3G	2024-03-06	Yes	Mobile	0.75	No	No	0	Always	No	Yes	Yes	No	OM	Statistics	F	60	92	83	23	Yes	Under-7	H	DC	Moderate	Yes	Yes	74	29.1854	68.4645	841.418	71.5159	933.841
Male	19	Government	No	Yes	Mid	Mobile Data	4G	2024-03-06	No	Mobile	0.5	No	Yes	0	Always	No	Yes	Yes	Yes	SA	Statistics	S	50	90	83	13	Yes	Under-7	H	DC	Moderate	Yes	Yes	77	24.7816	42.5138	532.946	83.4059	990.112
Female	21	Non Government	No	Yes	Mid	Mobile Data	4G	2024-01-03	No	Mobile	0.75	No	No	0	Always	No	Yes	Yes	No	KW	Geology	F	60	97	13	3	Yes	Under-7	H	DC	Moderate	Yes	Yes	60	26.3598	33.9218	706.624	82.4466	801.906
Female	19	Non Government	No	Yes	Mid	Wifi	4G	2024-03-06	No	Computer	0.75	No	No	0	Always	Yes	No	No	No	LEB	Materials Science	S	50	95	23	10	Yes	Under-7	H	DD	Moderate	Yes	Yes	64	29.07	51.0727	491.486	88.68	918.288
Female	21	Non Government	Yes	Yes	Mid	Wifi	4G	2024-01-03	No	Computer	0.75	No	Yes	0	Always	No	Yes	No	No	JO	English	F	60	87	23	11	Yes	Above-7	M	DD	Moderate	Yes	Yes	78	26.4869	32.284	602.851	60.7247	704.76
Male	24	Non Government	No	Yes	Mid	Wifi	4G	2024-01-03	No	Mobile	0.25	No	Yes	2	Always	Yes	Yes	No	No	SA	Environmental Science	S	50	80	20	15	Yes	Above-7	M	CB	Moderate	Yes	Yes	58	19.8305	34.4217	152.242	79.8457	960.773
Male	22	Non Government	No	Yes	Mid	Wifi	4G	2024-01-03	No	Computer	0.25	No	No	2	Sometimes	No	6	No	Yes	JO	Statistics	F	10	15	10	21	No	Above-7	L	DD	Low	Yes	Yes	74	24.9155	38.7756	726.637	55.6369	898.952
Female	24	Non Government	No	Yes	Mid	Mobile Data	4G	2024-01-03	No	Mobile	0.75	Yes	Yes	0	Always	Yes	Yes	Yes	No	KW	Computer Science	S	30	10	20	5	No	Above-7	L	CB	Moderate	Yes	Yes	48	25.2806	48.574	147.542	55.3388	995.067
Male	23	Government	No	Yes	Mid	Mobile Data	3G	2024-01-03	Yes	Mobile	0.75	No	No	0	Always	Yes	Yes	Yes	No	KW	Biology	F	24	35	18	31	No	Under-7	M	BB	Low	Yes	Yes	79	23.0896	47.33	835.376	45.2009	773.856
Male	18	Government	No	No	Mid	Mobile Data	3G	0	No	Mobile	0.5	Yes	No	0	Sometimes	Yes	Yes	Yes	Yes	LEB	Chemistry	S	27	20	33	35	No	Under-7	M	CB	Low	Yes	Yes	62	26.8373	61.9877	842.452	79.0942	867.524
Female	19	Government	No	Yes	Rich	Wifi	4G	2024-01-03	No	Mobile	0.5	Yes	No	0	Always	No	Yes	No	No	KW	Engineering	F	10	15	10	21	No	Above-7	L	BB	Moderate	Yes	Yes	67	29.2124	59.579	313.37	89.1489	725.721
Female	19	Non Government	No	Yes	Mid	Mobile Data	4G	2024-01-03	No	Mobile	0.75	Yes	No	2	Always	Yes	No	Yes	No	SA	Physics	S	30	10	20	5	No	Above-7	L	DD	Moderate	Yes	Yes	76	29.1068	47.0527	391.297	45.3805	555.472
Male	18	Non Government	No	Yes	Mid	Wifi	4G	2024-03-06	No	Tab	0.5	No	No	12	Always	Yes	Yes	No	Yes	JO	Materials Science	F	80	77	63	83	Yes	Under-7	M	DD	Moderate	Yes	Yes	70	23.4101	43.3482	533.179	33.3679	612.853
Male	19	Non Government	Yes	Yes	Mid	Wifi	4G	2024-01-03	No	Computer	0.5	Yes	No	12	Always	No	Yes	No	No	LEB	Chemistry	S	75	85	73	80	Yes	Under-7	M	DD	Moderate	Yes	Yes	60	19.3589	42.6588	636.997	78.9325	936.403
Male	19	Government	Yes	Yes	Rich	Wifi	4G	2024-01-03	No	Computer	1	No	No	2	Always	Yes	Yes	Yes	No	OM	Geology	F	40	7	50	41	No	Above-7	L	CB	High	Yes	Yes	58	29.8181	60.9598	358.618	67.2138	433.569
Female	22	Non Government	No	Yes	Mid	Wifi	4G	2024-03-06	No	Mobile	0.75	No	No	0	Never	No	No	Yes	Yes	LEB	Neuroscience	S	35	2	29	33	No	Above-7	L	CC	Moderate	Yes	Yes	64	28.0668	32.0829	633.238	87.5819	754.888
Female	20	Non Government	No	Yes	Mid	Wifi	4G	2024-03-06	No	Mobile	0.5	No	Yes	2	Always	Yes	No	No	Yes	LEB	Chemistry	F	10	90	30	21	No	Under-7	M	DC	Moderate	Yes	Yes	78	19.496	30.5129	368.008	45.1344	623.49
Male	20	Government	Yes	No	Mid	Mobile Data	3G	2024-01-03	No	Mobile	0.75	No	Yes	0	Always	Yes	Yes	No	Yes	OM	Computer Science	S	25	80	29	23	No	Under-7	M	DC	Low	Yes	Yes	68	29.0501	61.8218	149.942	34.2617	632.016
Male	23	Non Government	No	Yes	Rich	Mobile Data	3G	2024-01-03	No	Mobile	0.5	No	No	0	Always	Yes	No	No	No	OM	Geology	F	10	8	9	3	No	Above-7	L	DC	High	Yes	Yes	72	28.4388	49.0859	102.275	59.5465	930.743
Female	18	Government	No	No	Mid	Mobile Data	3G	2024-01-03	No	Mobile	0.5	No	Yes	0	Sometimes	No	No	Yes	Yes	OM	Computer Science	S	15	7	12	7	No	Above-7	L	DC	Low	Yes	Yes	68	24.2261	35.2352	191.036	35.128	912.293
Male	24	Government	No	Yes	Rich	Mobile Data	4G	2024-01-03	No	Mobile	1	Yes	Yes	0	Always	No	Yes	Yes	No	UAE	Environmental Science	F	70	90	20	21	No	Under-7	M	DC	Moderate	Yes	Yes	71	25.0953	39.4226	813.026	45.7074	759.305
Male	19	Non Government	No	Yes	Poor	Mobile Data	3G	2024-01-03	No	Mobile	0.5	No	No	0	Always	Yes	No	No	No	SA	Biology	S	75	80	15	20	No	Under-7	M	DD	Low	Yes	Yes	72	22.788	67.3002	965.288	37.5587	563.751
Female	18	Government	No	No	Mid	Mobile Data	4G	0	No	Mobile	None	Yes	No	0	Always	No	Yes	No	No	KW	Engineering	F	78	98	10	11	No	Under-7	M	CB	Low	Yes	Yes	90	18.6571	64.3801	484.27	43.4479	685.274
Male	22	Government	No	No	Poor	Mobile Data	3G	0	No	Mobile	0.5	No	No	0	Always	Yes	No	No	No	OM	English	S	79	89	11	14	No	Under-7	M	DC	Low	Yes	Yes	74	22.0224	58.3914	561.416	36.3687	644.976
Female	21	Non Government	No	Yes	Poor	Mobile Data	4G	2024-01-03	No	Mobile	1	Yes	Yes	0	Sometimes	No	No	No	Yes	OM	Geology	F	16	90	15	11	No	Under-7	M	CC	Moderate	Yes	Yes	80	27.6342	49.289	232.163	87.2344	612.171
Female	23	Non Government	No	Yes	Mid	Mobile Data	3G	2024-01-03	No	Mobile	0.75	No	Yes	0	Sometimes	No	No	No	No	JO	Statistics	S	17	80	13	10	No	Under-7	M	DD	Moderate	Yes	Yes	65	18.0556	50.8129	595.928	46.7138	461.671
Male	19	Non Government	No	Yes	Mid	Mobile Data	4G	2024-01-03	No	Mobile	0.75	Yes	No	0	Always	No	No	Yes	No	JO	Geology	F	40	87	50	41	No	Under-7	M	DC	High	Yes	Yes	71	22.002	69.0098	230.189	56.6339	725.868
Male	19	Non Government	No	Yes	Mid	Wifi	4G	2024-03-06	No	Tab	0.75	No	Yes	0	Never	No	No	No	Yes	OM	Engineering	S	35	92	29	33	No	Under-7	M	DD	Moderate	Yes	Yes	75	22.778	68.6308	650.093	83.9167	581.099
Female	19	Non Government	Yes	Yes	Mid	Mobile Data	3G	2024-01-03	No	Mobile	0.5	No	No	0	Never	No	No	No	Yes	KW	Materials Science	F	14	97	15	14	No	Under-7	H	DD	Low	Yes	Yes	63	24.4487	38.6108	939.933	70.6393	796.485
Male	20	Non Government	Yes	Yes	Mid	Mobile Data	3G	2024-01-03	No	Mobile	0.75	No	No	0	Sometimes	No	Yes	Yes	Yes	OM	Materials Science	F	13	82	20	30	No	Under-7	H	DC	Moderate	Yes	Yes	74	29.0383	62.4442	276.129	67.0822	591.522
Male	20	Non Government	Yes	Yes	Mid	Wifi	4G	2024-01-03	No	Computer	0.75	No	No	2	Always	No	No	Yes	Yes	LEB	Mathematics	S	24	97	15	14	No	Under-7	H	DD	Moderate	Yes	Yes	75	22.1562	37.8897	788.107	72.3338	658.698
Female	22	Non Government	Yes	No	Mid	Wifi	4G	2024-01-03	Yes	Computer	0.5	No	No	0	Always	No	No	Yes	Yes	SA	Environmental Science	S	23	82	20	30	No	Under-7	H	DD	Moderate	Yes	Yes	59	22.1634	38.5415	121.152	79.7293	431.416
Male	18	Non Government	Yes	No	Mid	Wifi	4G	2024-03-06	Yes	Computer	0.75	No	No	12	Always	No	Yes	Yes	No	OM	Engineering	F	20	3	9	3	No	Above-7	L	DD	Moderate	Yes	Yes	66	26.85	57.0437	437.948	82.6602	995.523
Male	22	Government	No	Yes	Rich	Mobile Data	4G	2024-01-03	No	Mobile	0.5	No	No	0	Sometimes	No	Yes	No	Yes	LEB	Biology	S	15	4	12	7	No	Above-7	L	BB	Moderate	Yes	Yes	47	23.4266	46.2	199.674	68.5584	704.566
Male	21	Government	No	Yes	Mid	Mobile Data	4G	2024-01-03	No	Mobile	0.75	Yes	Yes	0	Always	Yes	No	No	No	SA	Computer Science	F	5	13	6	6	No	Above-7	L	DD	Low	Yes	Yes	78	20.6953	67.2618	417.228	83.4004	414.543
Male	20	Non Government	No	No	Mid	Mobile Data	3G	2024-01-03	No	Mobile	0.75	No	Yes	0	Always	No	No	No	Yes	OM	Biology	S	7	9	11	10	No	Above-7	L	DD	Low	Yes	Yes	80	23.4293	33.5604	256.183	62.1239	724.738
Male	21	Non Government	Yes	Yes	Mid	Mobile Data	3G	2024-01-03	No	Mobile	0.75	Yes	Yes	0	Always	No	Yes	Yes	No	UAE	Environmental Science	F	10	94	40	11	Yes	Under-7	M	DC	Moderate	Yes	Yes	68	19.6903	50.461	435.974	46.6375	922.212
Male	20	Non Government	No	Yes	Mid	Mobile Data	4G	2024-01-03	No	Mobile	1	No	Yes	2	Sometimes	Yes	Yes	No	Yes	SA	Mathematics	S	25	89	21	13	Yes	Under-7	M	DC	Moderate	Yes	Yes	55	20.1166	66.7409	475.771	82.8046	863.531
Female	22	Non Government	Yes	Yes	Mid	Wifi	3G	2024-03-06	Yes	Computer	0.5	No	Yes	0	Sometimes	No	Yes	No	Yes	SA	Materials Science	F	30	98	42	21	Yes	Under-7	H	DD	Low	Yes	Yes	63	23.9804	66.1645	370.532	62.4884	820.544
Male	21	Non Government	No	Yes	Mid	Mobile Data	3G	2024-01-03	No	Mobile	0.5	No	No	2	Never	No	Yes	No	Yes	JO	Biology	S	35	97	41	23	Yes	Under-7	H	BA	Moderate	Yes	Yes	71	23.0271	36.2612	690.96	84.3683	483.679
Female	23	Non Government	No	Yes	Poor	Mobile Data	4G	2024-01-03	No	Mobile	1	No	Yes	0	Always	No	No	Yes	Yes	KW	Chemistry	F	32	88	32	25	Yes	Under-7	M	BA	Moderate	Yes	Yes	85	28.9782	44.6655	926.967	32.4101	794.642
Male	22	Government	No	Yes	Mid	Wifi	4G	2024-03-06	No	Mobile	0.5	Yes	No	0	3	No	Yes	Yes	Yes	LEB	Biology	S	25	87	21	27	Yes	Under-7	M	BA	Moderate	Yes	Yes	79	22.3487	54.7649	460.536	53.8509	859.779
Male	22	Government	No	No	Mid	Mobile Data	4G	2024-01-03	No	Mobile	0.5	No	No	0	Never	No	Yes	No	Yes	UAE	Geology	F	72	98	52	15	Yes	Under-7	H	AA	Moderate	Yes	Yes	78	24.9671	36.3758	273.109	86.8683	743.451
Female	19	Non Government	No	Yes	Poor	Mobile Data	3G	2024-01-03	No	Mobile	1	Yes	Yes	8	Always	Yes	Yes	Yes	Yes	LEB	Neuroscience	S	75	90	51	17	Yes	Under-7	H	BA	Low	Yes	Yes	73	25.5872	68.7209	343.65	44.979	935.649
Female	22	Non Government	No	Yes	Mid	Wifi	4G	2024-01-03	No	Mobile	1	Yes	No	0	Always	Yes	Yes	Yes	Yes	JO	Geology	F	20	88	31	28	Yes	Above-7	M	AA	Moderate	Yes	Yes	70	18.1571	66.59	868.601	86.4922	566.194
Female	18	Non Government	No	Yes	Mid	Wifi	4G	2024-03-06	No	Mobile	1	No	No	0	Always	Yes	Yes	Yes	No	UAE	English	S	10	98	41	38	Yes	Above-7	M	AA	High	Yes	Yes	67	25.9624	36.678	614.476	87.2341	545.287
Female	24	Non Government	No	Yes	Poor	Mobile Data	3G	2024-01-03	No	Mobile	0.5	No	Yes	0	Always	No	Yes	No	Yes	UAE	Physics	F	90	98	41	38	Yes	Under-7	H	AA	Low	Yes	Yes	71	20.1364	34.8462	509.51	82.9285	921.742
Male	22	Government	No	Yes	Mid	Wifi	3G	2024-01-03	Yes	Computer	1	No	Yes	0	Never	No	Yes	No	No	OM	Astronomy	S	80	88	51	39	Yes	Under-7	H	AA	Moderate	Yes	Yes	80	29.5328	33.4163	234.673	63.8201	775.239
Male	22	Non Government	No	Yes	Mid	Mobile Data	4G	2024-01-03	No	Mobile	0.75	No	Yes	0	Always	No	No	Yes	Yes	KW	Statistics	F	80	95	21	28	Yes	Under-7	H	BA	High	Yes	Yes	74	19.784	66.3777	504.755	68.8164	400.868
Male	19	Non Government	No	Yes	Mid	Mobile Data	4G	2024-01-03	No	Mobile	0.5	Yes	Yes	2	Sometimes	No	No	Yes	Yes	LEB	Materials Science	S	78	70	31	29	Yes	Under-7	H	AA	Moderate	Yes	Yes	68	22.9755	37.745	350.643	82.177	611.879
Female	24	Non Government	No	Yes	Mid	Wifi	4G	2024-03-06	No	Tab	0.5	Yes	Yes	0	Sometimes	Yes	Yes	Yes	No	SA	Chemistry	F	10	18	71	38	Yes	Above-7	M	Fail	Moderate	No	No	66	19.0242	46.6514	948.847	76.5538	914.714
Female	22	Non Government	No	No	Mid	Wifi	4G	2024-01-03	No	Mobile	1	No	Yes	0	Always	Yes	No	Yes	Yes	LEB	Geology	S	10	58	51	48	Yes	Above-7	M	BA	Low	Yes	Yes	69	29.9625	47.9541	895.663	67.8056	416.392
Female	20	Non Government	No	Yes	Poor	Mobile Data	3G	2024-01-03	No	Mobile	0.5	No	No	12	Always	Yes	No	No	No	KW	Chemistry	F	98	88	60	31	No	Under-7	H	AA	High	Yes	Yes	68	24.0263	53.9604	175.512	88.9356	401.949
Female	22	Non Government	Yes	Yes	Mid	Mobile Data	3G	2024-01-03	No	Mobile	0.75	Yes	Yes	0	Always	No	No	Yes	Yes	SA	Geology	S	75	81	51	34	No	Under-7	H	BB	Moderate	Yes	Yes	67	25.1446	32.8694	564.988	71.1406	568.756
Female	23	Non Government	No	Yes	Mid	Mobile Data	3G	2024-01-03	No	Mobile	1	Yes	Yes	0	Always	No	Yes	Yes	No	OM	Materials Science	F	10	17	50	21	No	Under-7	M	BA	Moderate	Yes	Yes	70	18.8049	39.0703	302.553	88.5289	948.4
Female	24	Government	No	No	Mid	Mobile Data	3G	2024-01-03	No	Mobile	0.75	Yes	Yes	12	Sometimes	No	Yes	6	Yes	KW	Mathematics	S	35	2	29	23	No	Under-7	M	BB	Low	Yes	Yes	68	26.9995	67.2596	469.699	33.4433	940.887
Male	21	Non Government	No	Yes	Mid	Mobile Data	3G	2024-01-03	No	Mobile	0.75	No	No	0	Never	No	No	No	Yes	SA	Materials Science	F	10	20	22	97	No	Above-7	L	AA	Moderate	Yes	Yes	94	20.5189	66.3364	889.163	38.3376	711.257
Female	21	Non Government	No	Yes	Poor	Mobile Data	3G	2024-01-03	No	Mobile	0.75	No	Yes	0	Never	No	No	No	Yes	SA	Chemistry	S	5	9	19	98	No	Above-7	L	Fail	Low	No	No	62	28.7767	61.2516	574.763	57.0875	731.942
Female	18	Government	No	Yes	Mid	Mobile Data	4G	2024-01-03	No	Mobile	0.5	Yes	Yes	0	Always	Yes	Yes	Yes	No	JO	Chemistry	F	10	10	40	51	No	Above-7	L	BB	Low	Yes	Yes	63	20.4617	30.776	400.794	53.0928	599.205
Female	18	Government	No	No	Mid	Mobile Data	4G	0	No	Mobile	0.5	Yes	Yes	0	Always	Yes	Yes	No	No	OM	Environmental Science	S	35	2	29	23	No	Above-7	L	AA	Low	Yes	Yes	62	20.2883	43.0803	287.1	76.9641	546.242
Female	18	Government	No	Yes	Mid	Wifi	3G	2024-01-03	No	Mobile	1	No	Yes	0	Sometimes	No	Yes	Yes	Yes	KW	Neuroscience	F	20	90	50	61	Yes	Above-7	M	CB	Low	Yes	Yes	63	18.4386	55.1183	820.292	39.6368	889.133
Female	23	Government	No	No	Mid	Mobile Data	3G	2024-01-03	No	Mobile	1	No	Yes	0	Always	No	Yes	No	No	SA	Neuroscience	S	32	82	59	63	Yes	Above-7	M	BB	Moderate	Yes	Yes	80	23.6648	41.0076	662.066	88.5657	463.777
Male	21	Government	No	Yes	Mid	Wifi	4G	2024-01-03	No	Mobile	1	No	No	0	Always	Yes	Yes	Yes	Yes	LEB	Engineering	F	10	30	50	91	Yes	Above-7	L	BB	Moderate	Yes	Yes	53	24.7781	66.3835	521.259	48.904	692.413
Female	18	Non Government	No	Yes	Mid	Wifi	4G	2024-01-03	No	Mobile	0.75	No	Yes	0	Sometimes	No	Yes	Yes	Yes	UAE	English	S	12	22	59	83	Yes	Above-7	L	AA	Low	Yes	Yes	88	18.7885	55.3556	295.736	55.7354	780.638
Male	19	Non Government	No	Yes	Mid	Mobile Data	4G	0	No	Mobile	0.5	Yes	Yes	0	Never	No	No	Yes	Yes	KW	Statistics	F	11	20	20	98	No	Above-7	L	BA	Low	Yes	Yes	80	27.3063	32.8763	400.822	46.4847	462.208
Male	24	Non Government	No	No	Mid	Wifi	4G	0	No	Mobile	0.5	Yes	Yes	0	Sometimes	No	No	Yes	No	JO	Computer Science	S	10	12	29	93	No	Above-7	L	Fail	Moderate	No	No	67	23.4395	66.3602	963.859	64.7618	711.764
Female	23	Government	No	No	Poor	Mobile Data	4G	2024-01-03	No	Mobile	1	No	Yes	0	Always	Yes	No	No	Yes	UAE	Engineering	F	69	82	20	28	Yes	Under-7	H	BA	Low	Yes	Yes	70	24.2927	68.3107	568.081	33.5177	746.513
Female	24	Government	No	No	Mid	Mobile Data	3G	0	No	Mobile	0.75	Yes	Yes	12	Sometimes	No	No	Yes	Yes	LEB	Chemistry	S	70	83	29	33	Yes	Under-7	H	Fail	Low	No	No	78	23.2892	33.1085	460.629	38.9807	845.498
Female	21	Non Government	No	No	Mid	Wifi	4G	0	No	Mobile	0.75	Yes	No	2	Sometimes	No	No	Yes	Yes	KW	Computer Science	F	89	92	40	28	Yes	Under-7	H	Fail	Low	No	No	74	22.8092	51.2944	569.28	74.7479	540.902
Female	18	Non Government	No	Yes	Poor	Mobile Data	4G	2024-01-03	No	Mobile	0.5	Yes	Yes	0	Always	No	Yes	No	Yes	LEB	Materials Science	S	79	93	49	23	Yes	Under-7	H	CC	Moderate	Yes	Yes	63	24.7157	42.1346	801.09	41.19	575.997
Male	23	Non Government	No	Yes	Mid	Mobile Data	3G	2024-01-03	No	Mobile	0.75	No	No	0	Never	No	Yes	Yes	No	JO	Astronomy	F	15	90	21	97	Yes	Under-7	M	CC	Low	Yes	Yes	61	19.8629	45.7136	406.098	44.1309	741.713
Female	24	Non Government	Yes	No	Mid	Mobile Data	3G	2024-03-06	Yes	Mobile	0.75	No	No	0	Always	Yes	No	No	No	JO	Biology	S	20	77	31	88	Yes	Under-7	M	AA	Moderate	Yes	Yes	74	20.1831	37.186	260.836	77.5789	989.876
Female	24	Non Government	No	Yes	Poor	Mobile Data	3G	2024-01-03	No	Mobile	0.75	Yes	Yes	12	Sometimes	No	Yes	No	Yes	UAE	Mathematics	F	4	10	11	7	No	Above-7	L	CB	Moderate	Yes	Yes	67	28.3414	53.1229	626.443	35.5981	530.496
Female	21	Non Government	No	Yes	Mid	Mobile Data	3G	2024-01-03	No	Mobile	1	No	No	12	Always	Yes	No	Yes	No	OM	Biology	S	5	0	1	8	No	Above-7	L	BB	Moderate	Yes	Yes	70	29.3534	68.3192	698.684	56.2484	991.542
Male	22	Government	No	Yes	Mid	Wifi	4G	2024-03-06	No	Mobile	0.5	Yes	No	0	Always	Yes	Yes	No	No	JO	Physics	F	88	81	50	10	Yes	Above-7	M	AA	Moderate	Yes	Yes	80	22.4797	50.1229	741.446	31.3838	828.606
Male	23	Non Government	No	Yes	Mid	Wifi	4G	2024-03-06	No	Tab	0.5	Yes	No	0	Always	Yes	No	Yes	Yes	KW	Mathematics	S	90	88	54	12	Yes	Above-7	M	AA	Moderate	Yes	Yes	66	21.2489	33.3166	893.789	50.8084	895.649
Male	20	Government	No	Yes	Mid	Wifi	4G	2024-01-03	No	Mobile	0.5	No	No	2	Never	No	No	No	Yes	KW	Astronomy	F	86	98	50	20	Yes	Under-7	H	AA	Moderate	Yes	Yes	69	25.728	54.8001	434.057	71.9389	453.785
Female	24	Non Government	No	Yes	Poor	Mobile Data	3G	0	No	Mobile	0.5	Yes	No	2	Always	No	Yes	No	No	JO	Mathematics	S	90	90	57	22	Yes	Under-7	H	AA	Low	Yes	Yes	72	22.9048	43.6089	167.819	35.4062	580.252
Female	20	Government	No	Yes	Mid	Wifi	4G	2024-01-03	No	Mobile	0.5	No	No	12	Always	Yes	No	Yes	Yes	UAE	Physics	F	78	91	50	40	Yes	Under-7	H	AA	Moderate	Yes	Yes	58	18.3046	64.237	962.514	83.3001	434.642
Female	24	Non Government	Yes	Yes	Mid	Wifi	4G	2024-01-03	Yes	Mobile	0.5	No	No	2	Always	Yes	No	Yes	Yes	JO	Chemistry	S	70	98	54	72	Yes	Under-7	H	BA	Moderate	Yes	Yes	82	19.8738	47.3871	491.511	84.5699	622.928
Male	19	Non Government	No	Yes	Mid	Mobile Data	3G	2024-01-03	No	Mobile	0.75	No	No	0	Always	No	Yes	Yes	Yes	OM	Chemistry	F	80	80	46	61	Yes	Under-7	M	CC	Moderate	Yes	Yes	67	26.5917	37.7136	660.932	36.2994	988.774
Female	19	Non Government	No	No	Mid	Wifi	4G	2024-01-03	No	Mobile	0.5	Yes	Yes	2	Sometimes	No	Yes	Yes	Yes	KW	Mathematics	S	85	82	59	63	Yes	Under-7	M	BA	Low	Yes	Yes	80	25.9071	37.6442	699.675	89.4439	463.164
Male	21	Non Government	No	Yes	Mid	Mobile Data	3G	2024-01-03	No	Mobile	0.5	No	Yes	0	Always	No	No	No	Yes	JO	Computer Science	F	88	90	86	81	Yes	Under-7	H	CC	Low	Yes	Yes	60	18.3252	60.7506	591.862	47.8518	737.424
Male	20	Non Government	No	Yes	Mid	Mobile Data	4G	2024-01-03	No	Mobile	0.5	No	No	12	Never	No	Yes	No	No	JO	Biology	S	89	92	89	83	Yes	Under-7	H	Fail	Moderate	No	No	82	20.6637	40.6235	284.732	35.0461	403.642
Female	18	Non Government	No	Yes	Mid	Wifi	4G	2024-03-06	No	Tab	0.5	No	No	12	Sometimes	No	No	No	Yes	OM	Environmental Science	F	39	71	40	26	No	Above-7	M	BA	Moderate	Yes	Yes	71	20.7729	60.6893	779.629	30.304	827.61
Female	23	Government	No	Yes	Rich	Wifi	4G	2024-01-03	No	Mobile	0.75	Yes	Yes	8	Sometimes	No	Yes	No	Yes	JO	Engineering	S	35	80	34	22	No	Above-7	M	Fail	Low	No	No	76	26.0627	38.2355	823.377	54.5114	518.316
Male	20	Non Government	No	Yes	Mid	Mobile Data	3G	2024-01-03	No	Mobile	0.75	No	No	0	Always	Yes	No	No	No	JO	Environmental Science	F	76	81	80	86	No	Under-7	H	Fail	Low	No	No	73	18.2365	42.8675	597.678	67.7886	477.751
Female	21	Non Government	No	Yes	Poor	Mobile Data	4G	2024-03-06	No	Mobile	1	No	No	0	Always	Yes	No	No	Yes	JO	Geology	S	65	89	64	82	No	Under-7	H	AA	Moderate	Yes	Yes	67	19.2493	48.6195	539.705	49.9308	602.211
Male	21	Non Government	Yes	Yes	Mid	Wifi	4G	2024-01-03	No	Computer	0.75	Yes	Yes	12	Never	No	No	Yes	Yes	UAE	Physics	F	96	95	70	70	Yes	Under-7	H	BA	Moderate	Yes	Yes	67	27.599	67.7278	202.544	80.203	862.627
Male	18	Government	No	Yes	Rich	Mobile Data	4G	2024-01-03	No	Mobile	0.5	No	No	0	Always	No	Yes	No	Yes	UAE	Biology	S	80	91	87	72	Yes	Under-7	H	BA	Moderate	Yes	Yes	48	20.1425	67.2693	175.556	72.9964	463.968
Female	18	Non Government	No	Yes	Poor	Mobile Data	4G	2024-01-03	No	Mobile	1	No	Yes	0	Always	Yes	No	No	No	UAE	Materials Science	F	2	9	10	1	No	Above-7	L	AA	Moderate	Yes	Yes	78	25.833	38.2749	405.608	51.0097	537.903
Male	19	Non Government	Yes	Yes	Mid	Mobile Data	3G	2024-03-06	Yes	Mobile	0.5	No	No	0	Always	Yes	No	No	Yes	JO	English	S	3	8	19	3	No	Above-7	L	BA	Moderate	Yes	Yes	78	20.8582	44.3288	379.762	74.0586	405.079
Female	22	Non Government	Yes	Yes	Mid	Wifi	4G	2024-01-03	Yes	Computer	0.75	No	No	12	Always	Yes	No	No	No	OM	Geology	F	50	79	10	31	No	Under-7	M	BA	Moderate	Yes	Yes	73	19.1933	35.976	958.291	86.4293	981.049
Male	20	Non Government	Yes	No	Mid	Mobile Data	3G	2024-01-03	No	Mobile	0.5	No	No	2	Sometimes	No	No	Yes	No	LEB	Engineering	S	53	88	9	33	No	Under-7	M	BB	Moderate	Yes	Yes	53	20.9181	50.3994	805.26	35.5858	755.287
Male	23	Government	No	Yes	Mid	Wifi	3G	2024-01-03	Yes	Computer	1	Yes	No	0	Never	No	No	Yes	No	KW	Mathematics	F	70	89	12	21	No	Under-7	H	AA	Moderate	Yes	Yes	69	26.6672	48.4233	693.932	48.3662	831.94
Female	23	Non Government	No	Yes	Mid	Wifi	4G	2024-01-03	No	Computer	1	No	No	0	Never	No	No	No	No	UAE	Environmental Science	S	59	90	19	43	No	Under-7	H	AA	Moderate	Yes	Yes	95	28.2684	66.0304	565.883	57.7996	790.83
Female	20	Non Government	No	Yes	Poor	Wifi	3G	2024-01-03	No	Mobile	0.5	Yes	No	0	Always	Yes	Yes	Yes	No	JO	Chemistry	F	78	80	66	51	Yes	Under-7	M	BB	Moderate	Yes	Yes	68	27.9626	67.2002	250.631	59.8794	486.619
Female	18	Non Government	No	Yes	Mid	Mobile Data	3G	2024-01-03	No	Mobile	0.25	Yes	Yes	12	Always	Yes	Yes	No	No	KW	English	S	79	72	79	83	Yes	Under-7	M	AA	Moderate	Yes	Yes	47	22.7662	45.3427	980.611	62.5317	756.964
Female	22	Non Government	No	Yes	Poor	Mobile Data	3G	2024-01-03	No	Mobile	0.5	No	No	2	Always	Yes	No	Yes	No	UAE	Neuroscience	F	10	9	2	1	No	Above-7	L	BA	Low	Yes	Yes	51	26.017	49.6695	437.537	48.0376	478.849
Female	20	Non Government	Yes	No	Mid	Wifi	4G	2024-01-03	Yes	Computer	0.5	No	No	0	Always	No	Yes	No	No	LEB	English	S	9	7	9	3	No	Above-7	L	BB	Moderate	Yes	Yes	52	20.4598	65.8494	196.233	70.0356	640.742
Female	23	Non Government	Yes	Yes	Mid	Wifi	4G	2024-01-03	No	Mobile	0.5	No	Yes	0	Always	Yes	Yes	No	No	UAE	Engineering	F	98	90	86	71	Yes	Under-7	H	AA	Low	Yes	Yes	65	21.5178	62.2683	544.419	68.7051	741.378
Male	24	Government	No	Yes	Rich	Mobile Data	4G	2024-01-03	No	Mobile	0.5	Yes	No	0	Always	Yes	Yes	Yes	No	KW	Neuroscience	S	89	92	89	83	Yes	Under-7	H	AA	Moderate	Yes	Yes	67	28.756	30.1463	886.598	64.6693	735.329
Male	24	Non Government	Yes	Yes	Mid	Wifi	4G	2024-03-06	No	Computer	0.5	No	No	0	Never	No	No	No	No	OM	Mathematics	F	88	90	76	81	Yes	Under-7	H	BB	Low	Yes	Yes	72	18.156	42.8024	898.562	36.8257	471.444
Male	20	Non Government	Yes	Yes	Mid	Wifi	4G	2024-01-03	No	Computer	0.75	No	No	0	Never	No	No	Yes	Yes	UAE	Biology	S	99	96	89	84	Yes	Under-7	H	CC	Moderate	Yes	Yes	72	19.0261	46.871	109.869	58.6181	420.662
Female	24	Non Government	No	Yes	Mid	Wifi	4G	2024-01-03	No	Computer	1	Yes	Yes	0	Always	No	Yes	Yes	No	UAE	Physics	F	82	89	22	31	Yes	Under-7	H	CC	Moderate	Yes	Yes	68	20.4946	39.1887	897.666	51.3736	878.941
Male	24	Non Government	No	No	Mid	Mobile Data	4G	2024-01-03	Yes	Mobile	0.5	Yes	No	0	Always	No	Yes	No	No	SA	Mathematics	S	84	92	29	43	Yes	Under-7	H	BB	Moderate	Yes	Yes	47	18.3184	37.9829	344.336	59.4623	835.553
Male	21	Non Government	No	Yes	Mid	Wifi	4G	2024-01-03	No	Mobile	0.5	No	No	2	Always	Yes	No	No	Yes	OM	Environmental Science	F	70	69	46	45	Yes	Above-7	M	AA	Low	Yes	Yes	81	20.1772	31.5114	135.075	85.312	449.091
Female	20	Non Government	No	Yes	Mid	Mobile Data	3G	2024-01-03	Yes	Mobile	0.5	Yes	No	0	Always	Yes	Yes	No	No	UAE	English	S	74	62	49	43	Yes	Above-7	M	BA	Moderate	Yes	Yes	69	24.9965	55.7348	863.011	58.8319	476.449
Male	19	Non Government	No	Yes	Mid	Mobile Data	4G	2024-01-03	No	Mobile	0.5	No	No	2	Always	Yes	No	Yes	No	UAE	Mathematics	F	90	79	76	79	Yes	Under-7	H	BA	High	Yes	Yes	80	23.0571	40.5004	877.48	30.8388	935.55
Male	22	Non Government	No	Yes	Rich	Wifi	4G	2024-03-06	No	Mobile	0.75	No	No	12	Always	Yes	Yes	No	No	OM	Engineering	S	84	77	79	68	Yes	Under-7	H	AA	High	Yes	Yes	73	28.7121	32.0939	636.608	56.3302	861.477
Female	20	Government	No	Yes	Mid	Wifi	3G	2024-01-03	No	Mobile	0.75	Yes	No	12	Always	Yes	Yes	Yes	Yes	JO	Engineering	F	80	80	62	11	Yes	Above-7	M	BA	Low	Yes	Yes	74	27.8093	39.2392	616.99	79.2389	997.696
Female	18	Non Government	No	Yes	Poor	Mobile Data	4G	2024-01-03	No	Mobile	0.5	Yes	Yes	2	Sometimes	No	No	Yes	Yes	OM	Neuroscience	S	81	82	69	13	Yes	Above-7	M	AA	Moderate	Yes	Yes	56	22.1018	62.0766	831.808	76.8037	552.392
Male	20	Non Government	No	Yes	Rich	Wifi	4G	2024-01-03	No	Mobile	1	No	No	0	Always	Yes	No	Yes	Yes	KW	Chemistry	F	10	0	2	41	No	Above-7	L	BA	Moderate	Yes	Yes	72	21.1131	64.0596	807.679	60.8034	692.682
Male	21	Non Government	No	Yes	Mid	Wifi	4G	0	No	Mobile	0.5	No	No	0	Always	No	Yes	Yes	Yes	OM	Engineering	S	11	2	9	49	No	Above-7	L	AA	Low	Yes	Yes	81	22.5563	49.3226	901.095	44.9861	541.876
Female	21	Non Government	No	Yes	Mid	Mobile Data	4G	2024-01-03	No	Mobile	0.5	No	No	2	Always	Yes	No	Yes	Yes	KW	Materials Science	F	85	89	22	61	No	Under-7	H	AA	Moderate	Yes	Yes	72	25.0835	46.6428	597.473	57.9053	773.68
Male	19	Government	No	Yes	Mid	Wifi	4G	2024-03-06	Yes	Computer	0.5	Yes	No	2	Always	No	Yes	No	Yes	KW	Engineering	S	80	89	23	68	No	Under-7	H	AA	Low	Yes	Yes	67	21.2168	69.1141	970.882	63.8221	469.249
Male	24	Government	Yes	Yes	Mid	Mobile Data	4G	2024-01-03	No	Mobile	0.5	No	Yes	0	Never	No	Yes	No	Yes	OM	Physics	F	95	87	62	81	No	Under-7	M	AA	Moderate	Yes	Yes	80	25.4898	38.0226	996.532	89.9923	476.346
Female	24	Non Government	No	Yes	Poor	Mobile Data	4G	2024-01-03	No	Mobile	0.5	No	No	0	Always	Yes	No	Yes	No	JO	Environmental Science	S	87	79	73	98	No	Under-7	M	CB	Moderate	Yes	Yes	74	22.9129	38.6144	204.89	68.6507	443.133
Female	22	Non Government	No	Yes	Poor	Mobile Data	3G	2024-01-03	No	Mobile	0.5	No	No	0	Always	Yes	Yes	Yes	Yes	OM	Biology	F	85	87	72	10	Yes	Above-7	M	AA	Low	Yes	Yes	72	24.6246	41.6747	864.589	71.6559	816.152
Male	22	Government	Yes	Yes	Mid	Mobile Data	4G	2024-01-03	No	Mobile	0.5	No	No	8	Always	Yes	No	Yes	No	LEB	Chemistry	S	79	88	79	20	Yes	Above-7	M	BB	Moderate	Yes	Yes	77	23.2335	36.9103	549.84	59.4872	696.444
Female	19	Non Government	No	Yes	Mid	Mobile Data	4G	2024-01-03	No	Mobile	0.5	No	No	0	Always	Yes	Yes	No	No	UAE	Neuroscience	F	80	81	71	30	Yes	Under-7	M	CC	Moderate	Yes	Yes	47	21.5336	45.1746	448.81	51.2694	770.639
Male	22	Government	Yes	No	Poor	Mobile Data	4G	2024-01-03	No	Mobile	0.5	No	No	0	Always	No	Yes	Yes	Yes	KW	Engineering	S	70	83	70	23	Yes	Under-7	M	BB	Moderate	Yes	Yes	63	29.3814	66.4334	651.765	78.7772	927.581
Male	23	Non Government	Yes	Yes	Poor	Wifi	4G	2024-01-03	Yes	Computer	0.5	No	Yes	0	Always	No	No	Yes	No	OM	Biology	F	80	82	76	19	Yes	Under-7	M	AA	High	Yes	Yes	98	27.1633	54.6139	150.369	59.6959	844.197
Male	21	Non Government	No	Yes	Mid	Mobile Data	4G	2024-01-03	No	Mobile	0.75	No	No	2	Never	Yes	No	Yes	Yes	JO	Engineering	S	70	82	75	29	Yes	Under-7	M	BA	Moderate	Yes	Yes	74	19.6814	46.4779	555.815	89.6814	677.034
Male	22	Non Government	No	Yes	Mid	Mobile Data	3G	2024-01-03	No	Mobile	0.5	No	No	2	Sometimes	Yes	Yes	Yes	Yes	UAE	Mathematics	F	89	87	86	15	Yes	Under-7	M	AA	Moderate	Yes	Yes	72	28.4216	67.3764	883.802	57.4272	990.614
Female	22	Non Government	No	Yes	Mid	Mobile Data	3G	2024-01-03	No	Mobile	0.5	Yes	Yes	0	Always	Yes	Yes	No	No	KW	Materials Science	S	90	86	85	10	Yes	Under-7	M	CB	Moderate	Yes	Yes	63	23.8492	31.9386	292.115	34.08	673.754
Male	18	Non Government	Yes	Yes	Mid	Wifi	3G	2024-01-03	No	Computer	0.5	Yes	No	2	Always	Yes	Yes	Yes	No	SA	Chemistry	F	69	77	76	75	Yes	Above-7	M	AA	Moderate	Yes	Yes	60	28.7346	38.411	483.751	70.9547	467.47
Male	24	Government	Yes	No	Mid	Mobile Data	4G	0	No	Mobile	0.5	No	Yes	2	Always	Yes	Yes	Yes	No	LEB	Materials Science	S	70	76	65	70	Yes	Above-7	M	CC	Low	Yes	Yes	70	27.5983	52.6355	945.533	32.7985	995.593
Female	22	Non Government	No	Yes	Mid	Wifi	3G	2024-01-03	Yes	Mobile	0.5	No	No	12	Never	No	Yes	No	Yes	KW	Materials Science	F	75	72	64	39	Yes	Above-7	L	BB	High	Yes	Yes	61	23.1026	54.6221	485.707	45.0301	413.692
Female	19	Government	Yes	Yes	Mid	Mobile Data	4G	2024-01-03	No	Mobile	0.5	Yes	No	8	Always	No	Yes	Yes	No	KW	Environmental Science	S	72	76	66	40	Yes	Above-7	L	BB	Moderate	Yes	Yes	68	18.2696	31.5823	422.531	51.2243	729.93
Male	18	Government	Yes	Yes	Mid	Mobile Data	3G	2024-01-03	No	Mobile	0.5	No	Yes	0	Always	Yes	Yes	Yes	No	KW	Physics	F	77	82	74	79	Yes	Under-7	M	CC	Low	Yes	Yes	68	21.2241	46.1216	496.483	74.369	585.457
Female	18	Non Government	No	Yes	Poor	Mobile Data	4G	2024-01-03	No	Mobile	0.5	Yes	Yes	0	Always	Yes	Yes	No	No	UAE	Geology	S	71	84	67	80	Yes	Under-7	M	CB	Moderate	Yes	Yes	64	24.4996	55.9662	567.507	59.6542	702.131
Male	19	Non Government	No	Yes	Mid	Mobile Data	3G	2024-01-03	No	Mobile	0.5	No	No	12	Always	Yes	Yes	Yes	No	SA	Statistics	F	87	92	74	89	Yes	Under-7	H	BB	Low	Yes	Yes	85	25.6017	57.9228	668.792	31.7188	735.228
Female	24	Government	No	Yes	Rich	Wifi	4G	2024-01-03	No	Mobile	0.5	No	Yes	0	Always	Yes	Yes	No	No	KW	Astronomy	S	81	84	77	85	Yes	Under-7	H	CC	Moderate	Yes	Yes	64	21.0947	55.5256	820.624	67.011	544.058
Female	23	Non Government	Yes	Yes	Mid	Mobile Data	3G	2024-01-03	No	Mobile	0.5	No	No	12	Sometimes	Yes	6	Yes	No	LEB	English	F	15	97	22	10	Yes	Under-7	H	BA	Moderate	Yes	Yes	58	19.6723	42.8225	506.892	54.6862	734.115
Male	20	Non Government	No	Yes	Mid	Mobile Data	3G	2024-01-03	No	Mobile	0.5	No	Yes	2	Always	No	Yes	Yes	No	OM	Engineering	S	19	98	20	2	Yes	Under-7	H	CC	Moderate	Yes	Yes	63	28.0192	33.7408	835.733	85.3101	853.637
Female	20	Non Government	No	Yes	Poor	Mobile Data	3G	2024-01-03	No	Mobile	0.5	No	No	0	Never	No	No	Yes	Yes	LEB	Materials Science	F	25	82	52	20	Yes	Above-7	M	BB	Low	Yes	Yes	75	29.8128	47.0845	580.349	59.9737	559.906
Male	24	Non Government	Yes	Yes	Poor	Wifi	3G	2024-03-06	No	Computer	0.75	No	No	2	Always	Yes	Yes	Yes	No	JO	Computer Science	S	29	78	40	12	Yes	Above-7	M	CC	Moderate	Yes	Yes	78	24.3083	35.1502	404.632	72.5385	630.056
Male	21	Government	No	No	Mid	Mobile Data	2G	0	No	Mobile	1	No	No	0	Always	Yes	No	No	Yes	JO	English	F	45	87	57	80	Yes	Under-7	M	BB	Low	Yes	Yes	72	20.0602	67.9049	692.156	43.1321	560.946
Male	20	Government	Yes	Yes	Mid	Wifi	4G	2024-01-03	Yes	Tab	0.5	No	No	12	Always	Yes	No	No	No	KW	Mathematics	S	39	88	43	72	Yes	Under-7	M	BA	Moderate	Yes	Yes	61	21.2677	49.0068	745.95	75.6584	892.336
Male	19	Non Government	No	Yes	Rich	Wifi	4G	2024-03-06	No	Tab	0.5	No	No	0	Always	Yes	No	No	No	UAE	Engineering	F	85	90	52	30	Yes	Under-7	H	CC	High	Yes	Yes	69	18.2207	42.6904	602.244	73.2573	834.989
Female	23	Non Government	No	Yes	Poor	Mobile Data	3G	2024-01-03	No	Mobile	0.5	Yes	Yes	12	Always	No	No	No	No	JO	Chemistry	S	79	91	49	22	Yes	Under-7	H	AA	Low	Yes	Yes	72	28.9716	60.6522	150.953	84.2449	922.718
Female	20	Non Government	No	Yes	Mid	Mobile Data	3G	2024-01-03	No	Mobile	0.75	Yes	No	0	Always	Yes	No	Yes	No	LEB	Neuroscience	F	90	91	80	81	Yes	Under-7	H	CC	Moderate	Yes	Yes	81	19.413	49.9179	252.895	32.0293	502.03
Female	23	Non Government	No	Yes	Rich	Wifi	4G	2024-01-03	No	Mobile	0.75	No	No	0	Always	Yes	No	No	Yes	UAE	Computer Science	S	80	90	80	83	Yes	Under-7	H	CC	High	Yes	Yes	106	24.9182	42.4014	356.768	56.85	444.148
Male	21	Non Government	No	Yes	Mid	Mobile Data	3G	2024-01-03	No	Mobile	0.75	No	Yes	0	Always	Yes	Yes	Yes	Yes	LEB	Environmental Science	F	80	83	82	71	Yes	Above-7	M	DD	Low	Yes	Yes	72	21.2887	62.4787	354.363	70.7493	471.63
Male	20	Government	No	No	Mid	Mobile Data	3G	2024-01-03	No	Mobile	0.75	No	No	0	Always	No	Yes	Yes	No	OM	Geology	S	71	81	83	72	Yes	Above-7	M	DC	Low	Yes	Yes	67	24.6501	64.6861	706.079	35.7098	496.611
Female	21	Non Government	No	No	Mid	Wifi	4G	2024-01-03	No	Mobile	0.5	No	Yes	0	Always	No	Yes	Yes	Yes	KW	Engineering	F	72	87	72	89	Yes	Above-7	M	DC	Low	Yes	Yes	59	25.817	56.9203	116.514	54.6362	719.85
Male	21	Non Government	No	Yes	Mid	Mobile Data	4G	2024-01-03	No	Mobile	0.75	No	No	0	Always	No	Yes	Yes	No	LEB	Engineering	S	69	77	83	92	Yes	Above-7	M	DC	High	Yes	Yes	64	27.9569	31.8786	780.114	86.5288	982.547
Male	22	Non Government	Yes	Yes	Mid	Wifi	4G	2024-03-06	Yes	Computer	0.75	No	No	0	Always	Yes	No	No	No	JO	Biology	F	85	99	42	90	Yes	Under-7	H	DD	Moderate	Yes	Yes	65	20.4771	52.6529	338.808	56.1561	614.341
Male	21	Non Government	No	Yes	Mid	Wifi	4G	2024-01-03	No	Mobile	0.75	No	Yes	0	Always	No	Yes	No	No	SA	Engineering	S	89	96	45	92	Yes	Under-7	H	DD	Moderate	Yes	Yes	80	18.1319	60.5318	379.02	89.1243	975.105
Male	19	Non Government	No	Yes	Mid	Wifi	4G	2024-01-03	No	Mobile	0.25	No	Yes	2	Always	Yes	Yes	No	No	SA	Materials Science	F	80	82	64	58	Yes	Under-7	H	CB	Moderate	Yes	Yes	68	19.6426	35.4601	575.119	33.4103	422.92
Female	24	Non Government	No	Yes	Mid	Mobile Data	4G	2024-01-03	No	Mobile	0.25	No	No	2	Sometimes	No	6	No	Yes	KW	Neuroscience	S	87	93	63	60	Yes	Under-7	H	DD	Moderate	Yes	Yes	80	28.8002	39.1468	294.333	73.0698	956.123
Male	24	Government	No	No	Mid	Wifi	4G	2024-01-03	No	Mobile	0.75	Yes	Yes	0	Always	Yes	Yes	Yes	No	SA	Biology	F	15	9	14	80	No	Above-7	L	CB	Low	Yes	Yes	78	28.4867	65.2998	896.024	64.861	508.692
Male	21	Non Government	No	No	Mid	Wifi	4G	0	No	Mobile	0.75	No	No	0	Always	Yes	Yes	Yes	No	JO	Physics	S	9	6	15	85	No	Above-7	L	BB	Moderate	Yes	Yes	72	25.169	30.8049	176.832	60.0324	947.485
Male	21	Non Government	Yes	Yes	Poor	Wifi	3G	2024-03-06	No	Mobile	0.5	Yes	No	0	Sometimes	Yes	Yes	Yes	Yes	JO	Engineering	F	81	86	86	41	Yes	Under-7	M	CB	Low	Yes	Yes	63	25.2062	60.1091	499.944	88.2508	433.736
Male	22	Non Government	Yes	Yes	Mid	Wifi	4G	2024-03-06	No	Computer	0.5	Yes	No	0	Always	No	Yes	No	No	JO	Mathematics	S	78	82	78	53	Yes	Under-7	M	BB	Low	Yes	Yes	58	25.9804	48.9509	864.48	37.779	968.932
Male	24	Government	No	Yes	Mid	Wifi	3G	2024-01-03	Yes	Mobile	0.75	Yes	No	2	Always	Yes	No	Yes	No	LEB	English	F	80	87	74	68	Yes	Under-7	M	DD	Moderate	Yes	Yes	48	20.1045	47.8709	654.26	83.7599	520.479
Male	24	Government	No	Yes	Mid	Wifi	4G	2024-01-03	No	Mobile	0.5	No	No	12	Always	Yes	Yes	No	Yes	OM	Mathematics	S	85	88	79	70	Yes	Under-7	M	DD	Moderate	Yes	Yes	72	28.9729	30.2839	363.097	71.4744	581.628
Female	18	Non Government	No	Yes	Mid	Wifi	3G	2024-01-03	No	Mobile	0.5	Yes	No	12	Always	No	Yes	No	No	KW	Astronomy	F	2	7	4	8	No	Above-7	L	DD	High	Yes	Yes	61	23.0252	62.7759	478.684	45.5398	694.565
Male	18	Government	No	No	Mid	Mobile Data	3G	0	No	Mobile	1	No	No	2	Always	Yes	Yes	Yes	No	KW	Materials Science	S	5	4	5	8	No	Above-7	L	CB	Low	Yes	Yes	72	22.5977	44.393	736.025	84.1001	628.433
Male	20	Non Government	No	Yes	Mid	Mobile Data	4G	2024-01-03	No	Mobile	0.75	No	No	0	Never	No	No	Yes	Yes	OM	Statistics	F	50	77	14	28	No	Under-7	M	CC	High	Yes	Yes	64	24.227	51.6306	975.935	55.7577	800.517
Male	20	Government	No	No	Mid	Mobile Data	4G	2024-01-03	No	Mobile	0.5	No	Yes	2	Always	Yes	No	No	Yes	LEB	Astronomy	S	55	74	25	29	No	Under-7	M	DC	Moderate	Yes	Yes	94	18.5636	57.092	903.825	78.8536	984.885
Male	20	Non Government	No	Yes	Mid	Mobile Data	3G	2024-01-03	No	Mobile	0.75	No	Yes	0	Always	Yes	Yes	No	Yes	LEB	Neuroscience	F	30	17	14	57	No	Above-7	L	DC	Low	Yes	Yes	98	19.9954	58.1052	408.19	53.3302	763.856
Female	18	Non Government	No	Yes	Mid	Wifi	4G	2024-03-06	No	Tab	0.5	No	No	0	Always	Yes	No	No	No	KW	Environmental Science	S	35	14	23	62	No	Above-7	L	DC	Moderate	Yes	Yes	72	26.8564	68.2392	998.378	81.0558	832.891
Female	24	Government	No	Yes	Mid	Wifi	4G	2024-01-03	Yes	Mobile	0.5	No	Yes	0	Sometimes	No	No	Yes	Yes	JO	Mathematics	F	15	16	2	20	Yes	Under-7	M	DC	Low	Yes	Yes	57	18.9936	51.2536	103.154	68.1977	452.803
Male	21	Non Government	No	Yes	Mid	Wifi	4G	2024-03-06	No	Tab	1	Yes	Yes	0	Always	No	Yes	Yes	No	UAE	English	F	20	20	3	25	Yes	Under-7	M	DC	Moderate	Yes	Yes	73	25.2378	45.9888	124.867	38.4628	776.687
Male	19	Non Government	Yes	Yes	Rich	Wifi	4G	2024-01-03	Yes	Computer	0.5	No	No	0	Always	Yes	No	No	No	JO	English	F	10	7	0	30	No	Above-7	L	DD	High	Yes	Yes	82	20.9442	68.1481	841.456	68.9798	672.31
Female	23	Non Government	No	No	Mid	Wifi	4G	2024-01-03	No	Mobile	None	Yes	No	0	Always	No	Yes	No	No	LEB	Biology	F	30	25	5	35	No	Above-7	L	CB	Moderate	Yes	Yes	63	22.6715	55.6844	279.516	41.4807	931.469
Female	23	Non Government	No	Yes	Mid	Wifi	4G	2024-03-06	No	Mobile	0.5	No	No	0	Always	Yes	No	No	No	JO	Geology	F	40	50	12	50	No	Above-7	M	DC	Moderate	Yes	Yes	65	21.4643	41.926	154.692	54.7154	632.927
Male	19	Government	No	Yes	Mid	Wifi	4G	2024-03-06	No	Mobile	1	Yes	Yes	0	Sometimes	No	No	No	Yes	KW	Computer Science	F	42	30	13	70	Yes	Above-7	M	CC	Moderate	Yes	Yes	80	22.2681	35.0586	313.433	40.2177	807.672
Male	22	Non Government	No	Yes	Mid	Mobile Data	4G	0	No	Mobile	0.75	No	Yes	0	Sometimes	No	No	No	No	SA	Physics	F	35	12	0	17	No	Above-7	L	DD	Low	Yes	Yes	92	26.6286	63.7022	483.49	31.321	536.892
Male	22	Non Government	Yes	Yes	Mid	Wifi	4G	2024-01-03	No	Mobile	0.75	Yes	No	0	Always	No	No	Yes	No	LEB	Environmental Science	F	50	10	15	22	Yes	Under-7	M	DC	Low	Yes	Yes	69	21.5655	44.4873	757.51	42.7132	555.624
Female	21	Non Government	No	Yes	Poor	Mobile Data	4G	2024-01-03	No	Mobile	0.75	No	Yes	0	Never	No	No	No	Yes	OM	Engineering	F	12	21	16	50	Yes	Under-7	M	DD	Moderate	Yes	Yes	63	24.7969	56.4188	661.902	62.1823	625.673
Male	22	Government	Yes	No	Poor	Mobile Data	4G	2024-01-03	No	Mobile	0.5	No	No	0	Never	No	No	No	Yes	LEB	Mathematics	F	70	80	25	70	Yes	Under-7	M	DD	Moderate	Yes	Yes	64	23.7126	48.8327	313.859	58.8937	582.438
Female	22	Government	No	Yes	Rich	Wifi	4G	2024-01-03	No	Mobile	0.75	No	No	0	Sometimes	No	Yes	Yes	Yes	JO	Engineering	F	50	88	30	80	Yes	Under-7	H	DC	Moderate	Yes	Yes	58	25.9641	37.9572	552.943	60.0898	552.327
Female	22	Non Government	No	No	Mid	Mobile Data	3G	0	No	Mobile	0.75	No	No	2	Always	No	No	Yes	Yes	KW	Engineering	F	19	6	19	12	Yes	Under-7	M	DD	Low	Yes	Yes	97	29.242	54.0675	933.593	44.8612	429.801
Female	24	Government	No	Yes	Mid	Wifi	4G	0	No	Mobile	0.5	No	No	0	Always	No	No	Yes	Yes	SA	Chemistry	F	5	1	0	11	No	Above-7	L	DD	Low	Yes	Yes	58	26.7909	32.4273	833.507	71.1097	902.048
Male	18	Government	No	Yes	Rich	Mobile Data	4G	2024-01-03	No	Mobile	0.75	No	No	12	Always	No	Yes	Yes	No	OM	Neuroscience	F	20	14	12	19	No	Above-7	L	DD	Moderate	Yes	Yes	70	20.5793	46.5337	390.871	72.2558	438.581
Male	23	Government	No	Yes	Mid	Mobile Data	3G	2024-01-03	Yes	Mobile	0.5	No	No	0	Sometimes	No	Yes	No	Yes	LEB	Statistics	F	62	70	44	60	No	Above-7	H	BB	Low	Yes	Yes	75	18.3742	51.8646	984.038	51.4781	932.419
Female	20	Non Government	No	Yes	Mid	Mobile Data	4G	2024-01-03	No	Mobile	0.75	Yes	Yes	0	Always	Yes	No	No	No	SA	Statistics	F	30	40	22	66	Yes	Under-7	M	DD	Moderate	Yes	Yes	63	21.1472	47.4419	737.758	82.8702	475.279
Male	23	Non Government	No	Yes	Mid	Wifi	4G	2024-01-03	No	Mobile	0.75	No	Yes	0	Always	No	No	No	Yes	JO	Engineering	F	36	30	20	80	No	Above-7	M	DD	Moderate	Yes	Yes	65	25.1409	59.9469	156.204	68.6414	439.157
Male	20	Government	No	Yes	Mid	Mobile Data	4G	0	No	Mobile	0.75	Yes	Yes	0	Always	No	Yes	Yes	No	UAE	Computer Science	F	55	13	35	90	No	Above-7	M	DC	Low	Yes	Yes	60	18.6171	63.117	131.645	72.7824	737.803
Male	22	Government	No	No	Mid	Mobile Data	2G	0	No	Mobile	1	No	Yes	2	Sometimes	Yes	Yes	No	Yes	LEB	Environmental Science	F	69	15	36	96	Yes	Under-7	M	DC	Low	Yes	Yes	52	23.9564	60.8497	251.567	46.6404	701.465
Female	24	Non Government	No	Yes	Mid	Mobile Data	4G	2024-01-03	No	Mobile	0.5	No	Yes	0	Sometimes	No	Yes	No	Yes	JO	Computer Science	F	70	50	40	99	Yes	Under-7	H	DD	Moderate	Yes	Yes	60	25.1621	31.5525	755.07	30.0367	694.741
Female	19	Non Government	No	Yes	Mid	Mobile Data	4G	2024-01-03	No	Mobile	0.5	No	No	2	Never	No	Yes	No	Yes	UAE	Engineering	F	60	60	33	90	No	Above-7	M	BA	Moderate	Yes	Yes	54	22.0109	37.7652	265.365	81.9225	744.703
Female	24	Non Government	No	Yes	Mid	Mobile Data	4G	2024-01-03	No	Mobile	1	No	Yes	0	Always	No	No	Yes	Yes	SA	Astronomy	F	10	12	4	80	No	Under-7	M	BA	Moderate	Yes	Yes	90	27.2509	51.4643	560.338	79.3455	572.234
Male	24	Government	Yes	No	Mid	Mobile Data	3G	2024-01-03	No	Mobile	0.5	Yes	No	0	3	No	Yes	Yes	Yes	OM	Biology	F	15	21	2	90	No	Under-7	M	BA	Low	Yes	Yes	83	19.2792	67.3929	183.934	37.3915	797.77
Male	23	Government	No	Yes	Mid	Wifi	3G	2024-01-03	Yes	Mobile	0.5	No	No	0	Never	No	Yes	No	Yes	JO	Materials Science	F	2	0	2	50	No	Above-7	L	AA	Moderate	Yes	Yes	80	18.9017	63.3983	928.798	52.4463	701.441
Female	24	Government	No	No	Mid	Mobile Data	3G	0	No	Mobile	1	Yes	Yes	8	Always	Yes	Yes	Yes	Yes	JO	English	F	0	2	3	70	Yes	Above-7	L	BA	Low	Yes	Yes	72	26.7383	63.7014	409.565	69.6804	600.846
Male	22	Non Government	Yes	Yes	Mid	Mobile Data	3G	2024-01-03	No	Mobile	1	Yes	No	0	Always	Yes	Yes	Yes	Yes	SA	Mathematics	F	8	7	30	40	Yes	Above-7	L	AA	Moderate	Yes	Yes	61	23.9459	42.1283	917.319	69.1267	895.9
Male	18	Non Government	Yes	Yes	Mid	Mobile Data	4G	2024-01-03	No	Mobile	1	No	No	0	Always	Yes	Yes	Yes	No	LEB	Physics	F	19	19	25	40	Yes	Under-7	M	AA	Moderate	Yes	Yes	74	26.2608	47.1779	950.388	81.621	836.633
Male	22	Non Government	No	Yes	Mid	Mobile Data	4G	2024-01-03	No	Mobile	0.5	No	Yes	0	Always	No	Yes	No	Yes	SA	Physics	F	25	15	12	33	No	Above-7	L	AA	High	Yes	Yes	88	23.2179	48.8282	105.516	38.4161	636.166
Male	19	Government	No	Yes	Mid	Mobile Data	4G	0	No	Mobile	1	No	Yes	0	Never	No	Yes	No	No	LEB	Physics	F	75	85	52	43	Yes	Under-7	M	AA	Low	Yes	Yes	47	20.9568	36.2949	517.722	55.7964	908.571
Male	24	Government	No	No	Poor	Mobile Data	4G	0	No	Mobile	0.75	No	Yes	0	Always	No	No	Yes	Yes	OM	Computer Science	F	30	90	33	35	No	Under-7	M	BA	Low	Yes	Yes	106	27.8292	31.2427	122.19	35.8335	952.155
Female	24	Non Government	No	Yes	Poor	Wifi	4G	2024-03-06	No	Mobile	0.5	Yes	Yes	2	Sometimes	No	No	Yes	Yes	KW	Statistics	F	35	80	50	70	Yes	Under-7	H	AA	Low	Yes	Yes	67	27.593	67.8761	917.823	53.3757	722.12
Male	18	Non Government	No	Yes	Mid	Wifi	4G	2024-01-03	No	Computer	0.5	Yes	Yes	0	Sometimes	Yes	Yes	Yes	No	OM	Geology	F	4	5	40	16	Yes	Above-7	L	Fail	Low	No	No	60	26.3364	39.6285	566.567	30.9064	528.971
Female	18	Government	No	No	Mid	Mobile Data	4G	0	No	Mobile	1	No	Yes	0	Always	Yes	No	Yes	Yes	KW	Geology	F	2	19	10	50	Yes	Above-7	L	BA	Low	Yes	Yes	80	21.2657	39.598	167.45	83.8964	949.475
Male	19	Government	No	Yes	Mid	Wifi	4G	2024-03-06	Yes	Computer	0.5	No	No	12	Always	Yes	No	No	No	LEB	Computer Science	F	8	22	9	40	No	Above-7	L	AA	Low	Yes	Yes	72	25.0828	33.3352	199.249	61.6226	513.688
Male	18	Non Government	No	Yes	Poor	Mobile Data	3G	2024-01-03	No	Mobile	0.75	Yes	Yes	0	Always	No	No	Yes	Yes	UAE	Physics	F	12	11	8	40	No	Above-7	L	BB	Low	Yes	Yes	77	22.3317	67.1403	445.158	80.9881	429.054
Female	20	Government	No	No	Rich	Mobile Data	4G	2024-01-03	No	Mobile	1	Yes	Yes	0	Always	No	Yes	Yes	No	OM	Statistics	F	10	12	17	30	No	Above-7	L	BA	High	Yes	Yes	63	19.099	53.1895	946.211	33.5943	596.492
Male	21	Non Government	No	Yes	Mid	Mobile Data	4G	0	No	Mobile	0.75	Yes	Yes	12	Sometimes	No	Yes	6	Yes	SA	Astronomy	F	8	6	4	22	Yes	Above-7	L	BB	Low	Yes	Yes	63	29.0078	56.6815	723.618	43.6475	836.18
Female	20	Non Government	No	Yes	Mid	Mobile Data	4G	2024-01-03	No	Mobile	0.75	No	No	0	Never	No	No	No	Yes	LEB	Materials Science	F	45	54	26	90	Yes	Under-7	M	AA	Moderate	Yes	Yes	60	19.6418	66.4631	880.857	45.5628	953.964
Female	20	Government	No	Yes	Rich	Wifi	4G	2024-01-03	No	Mobile	0.75	No	Yes	0	Never	No	No	No	Yes	KW	Neuroscience	F	0	0	0	4	No	Above-7	L	Fail	Low	No	No	68	29.4028	43.8248	429.811	53.2015	782.371
Male	24	Government	No	No	Poor	Mobile Data	4G	2024-01-03	No	Mobile	0.5	Yes	Yes	0	Always	Yes	Yes	Yes	No	KW	Mathematics	F	50	90	37	70	Yes	Under-7	M	BB	Moderate	Yes	Yes	66	23.3521	54.8603	138.892	78.172	971.103
Male	20	Non Government	No	Yes	Poor	Wifi	4G	0	No	Mobile	0.5	Yes	Yes	0	Always	Yes	Yes	No	No	JO	Chemistry	F	14	13	3	70	No	Above-7	L	AA	Low	Yes	Yes	54	20.2216	31.552	976.886	53.1935	455.423
Female	19	Non Government	No	No	Mid	Wifi	4G	2024-03-06	No	Mobile	1	No	Yes	0	Sometimes	No	Yes	Yes	Yes	LEB	Materials Science	F	19	20	16	50	No	Under-7	M	CB	Moderate	Yes	Yes	92	24.5028	37.4709	115.456	42.2792	436.452
Male	22	Non Government	Yes	Yes	Poor	Mobile Data	3G	2024-01-03	Yes	Mobile	1	No	Yes	0	Always	No	Yes	No	No	KW	Computer Science	F	10	12	7	33	Yes	Above-7	L	BB	Moderate	Yes	Yes	71	28.4754	63.2498	952.886	33.8994	762.515
Female	22	Non Government	No	Yes	Mid	Mobile Data	4G	2024-01-03	No	Mobile	1	No	No	0	Always	Yes	Yes	Yes	Yes	JO	Mathematics	F	30	35	28	90	Yes	Under-7	M	BB	Moderate	Yes	Yes	79	26.7867	60.6707	431.81	34.7695	979.67
Male	22	Non Government	No	Yes	Mid	Mobile Data	4G	2024-01-03	No	Mobile	0.75	No	Yes	0	Sometimes	No	Yes	Yes	Yes	JO	Biology	F	33	33	30	90	No	Under-7	M	AA	Moderate	Yes	Yes	61	27.6787	44.0257	109.081	75.6028	701.633
Male	18	Non Government	Yes	Yes	Mid	Mobile Data	3G	2024-01-03	No	Mobile	0.5	Yes	Yes	0	Never	No	No	Yes	Yes	SA	Astronomy	F	20	12	15	70	No	Above-7	L	BA	Moderate	Yes	Yes	80	25.9054	45.0724	720.242	56.6882	430.909
Female	22	Non Government	No	Yes	Rich	Wifi	4G	2024-03-06	No	Computer	0.5	Yes	Yes	0	Sometimes	No	No	Yes	No	UAE	Statistics	F	7	10	1	30	No	Above-7	L	Fail	Moderate	No	No	70	26.3073	51.3422	982.486	73.5709	532.731
Female	24	Non Government	No	Yes	Mid	Mobile Data	4G	2024-01-03	Yes	Mobile	1	No	Yes	0	Always	Yes	No	No	Yes	JO	Engineering	F	70	4	39	90	Yes	Under-7	H	BA	Moderate	Yes	Yes	70	28.1903	30.0096	969.063	70.9372	546.876
Female	19	Non Government	No	Yes	Poor	Mobile Data	4G	2024-01-03	No	Mobile	0.75	Yes	Yes	12	Sometimes	No	No	Yes	Yes	JO	Statistics	F	13	80	40	88	Yes	Under-7	H	Fail	Moderate	No	No	62	20.996	39.6498	244.843	38.1217	602.714
Male	20	Non Government	No	Yes	Poor	Wifi	4G	0	No	Mobile	0.75	Yes	No	2	Sometimes	No	No	Yes	Yes	OM	Mathematics	F	29	39	50	77	Yes	Under-7	M	Fail	Low	No	No	74	23.8731	38.3293	263.123	38.5733	426.162
Male	18	Non Government	Yes	Yes	Mid	Wifi	4G	2024-03-06	Yes	Computer	0.5	Yes	Yes	0	Always	No	Yes	No	Yes	KW	Statistics	F	20	14	12	70	No	Above-7	L	CC	Moderate	Yes	Yes	67	20.6545	40.0193	608.985	75.3205	942.936
Female	18	Non Government	Yes	Yes	Mid	Mobile Data	3G	2024-01-03	No	Mobile	0.75	No	No	0	Never	No	Yes	Yes	No	JO	Biology	F	39	15	16	50	No	Above-7	L	CC	Moderate	Yes	Yes	62	29.852	62.2362	673.574	73.2761	709.338
Female	18	Government	No	No	Mid	Mobile Data	2G	2024-01-03	No	Mobile	0.75	No	No	0	Always	Yes	No	No	No	SA	Environmental Science	F	55	90	16	40	No	Under-7	M	AA	Low	Yes	Yes	60	29.3287	41.187	765.476	52.6818	802.558
Female	18	Government	No	Yes	Mid	Wifi	4G	2024-01-03	No	Mobile	0.75	Yes	Yes	12	Sometimes	No	Yes	No	Yes	JO	Materials Science	F	49	70	19	75	Yes	Under-7	H	CB	Low	Yes	Yes	80	18.4731	37.6609	262.945	34.6453	440.304
Female	22	Government	No	No	Mid	Mobile Data	4G	0	No	Mobile	1	No	No	12	Always	Yes	No	Yes	No	JO	Biology	F	12	50	8	30	No	Above-7	L	BB	Low	Yes	Yes	74	26.4669	50.1705	963.106	30.7259	432.469
Male	21	Non Government	No	Yes	Mid	Wifi	4G	2024-01-03	No	Mobile	0.5	Yes	No	0	Always	Yes	Yes	No	No	JO	Neuroscience	F	16	14	6	20	Yes	Above-7	L	AA	Moderate	Yes	Yes	84	29.103	64.6258	674.865	47.2894	751.881
Male	23	Government	No	No	Mid	Mobile Data	3G	2024-01-03	No	Mobile	0.5	Yes	No	0	Always	Yes	No	Yes	Yes	KW	Mathematics	F	19	5	4	1	Yes	Above-7	L	AA	Low	Yes	Yes	78	20.1669	39.654	862.342	30.5533	932.378
Female	23	Non Government	No	Yes	Mid	Mobile Data	4G	2024-01-03	No	Mobile	0.5	No	No	2	Never	No	No	No	Yes	SA	Mathematics	F	5	2	6	5	Yes	Above-7	L	AA	Moderate	Yes	Yes	68	24.8153	33.1414	586.059	43.8044	717.089
Female	21	Government	No	No	Mid	Mobile Data	4G	0	No	Mobile	0.5	Yes	No	2	Always	No	Yes	No	No	UAE	English	F	28	60	19	50	Yes	Under-7	M	AA	Low	Yes	Yes	61	28.9859	44.2562	472.849	55.17	926.692
Male	19	Non Government	No	Yes	Rich	Mobile Data	3G	2024-01-03	No	Mobile	0.5	No	No	12	Always	Yes	No	Yes	Yes	UAE	Materials Science	F	27	22	22	40	No	Under-7	M	AA	Moderate	Yes	Yes	63	18.4074	59.9061	979.465	37.2849	886.595
Male	20	Non Government	No	Yes	Mid	Wifi	4G	2024-03-06	No	Tab	0.5	No	No	2	Always	Yes	No	Yes	Yes	UAE	Computer Science	F	21	10	28	20	No	Above-7	L	BA	Moderate	Yes	Yes	76	26.369	52.0276	623.909	36.2567	445.512
Male	21	Non Government	Yes	No	Mid	Mobile Data	3G	2024-01-03	Yes	Computer	0.75	No	No	0	Always	No	Yes	Yes	Yes	JO	Environmental Science	F	50	70	32	40	Yes	Under-7	M	CC	Moderate	Yes	Yes	72	21.5682	62.6717	880.186	83.7862	521.174
Female	20	Non Government	No	Yes	Mid	Mobile Data	4G	2024-03-06	No	Mobile	0.5	Yes	Yes	2	Sometimes	No	Yes	Yes	Yes	OM	Materials Science	F	80	90	70	80	Yes	Under-7	H	BA	Moderate	Yes	Yes	70	29.0928	68.3837	957.963	65.1282	794.626
Male	21	Government	No	Yes	Mid	Mobile Data	4G	0	No	Mobile	0.5	No	Yes	0	Always	No	No	No	Yes	UAE	Neuroscience	F	17	13	16	12	Yes	Under-7	M	CC	Low	Yes	Yes	74	29.6527	61.7065	707.819	86.0673	666.101
Male	24	Non Government	Yes	Yes	Mid	Wifi	4G	2024-01-03	No	Computer	0.5	No	No	12	Never	No	Yes	No	No	OM	Statistics	F	0	5	7	2	No	Above-7	L	Fail	Moderate	No	No	92	29.3312	54.1521	594.045	50.7496	574.42
Male	21	Government	No	No	Mid	Mobile Data	4G	2024-01-03	No	Mobile	0.5	No	No	12	Sometimes	No	No	No	Yes	LEB	Biology	F	13	5	18	19	No	Above-7	L	BA	High	Yes	Yes	69	23.6906	49.7337	103.16	70.6287	651.18
Male	21	Non Government	No	Yes	Mid	Wifi	4G	2024-01-03	No	Computer	0.75	Yes	Yes	8	Sometimes	No	Yes	No	Yes	JO	Physics	F	25	10	19	30	No	Above-7	M	Fail	Low	No	No	68	28.3445	31.6028	136.018	42.2815	667.12
Female	24	Non Government	No	Yes	Mid	Mobile Data	4G	0	No	Mobile	0.75	No	No	0	Always	Yes	No	No	No	OM	Biology	F	65	75	23	80	Yes	Under-7	H	Fail	Low	No	No	60	28.1346	69.3729	280.766	67.1004	946.331
Female	18	Government	No	No	Mid	Mobile Data	3G	2024-01-03	No	Mobile	1	No	No	0	Always	Yes	No	No	Yes	OM	Computer Science	F	70	69	35	30	Yes	Under-7	H	AA	Low	Yes	Yes	68	21.8292	45.3392	267.408	37.7751	462.075
Female	20	Non Government	No	Yes	Mid	Wifi	4G	2024-03-06	No	Mobile	0.75	Yes	Yes	12	Never	No	No	Yes	Yes	UAE	Materials Science	F	39	40	11	33	No	Under-7	M	BA	Moderate	Yes	Yes	54	27.947	36.0891	329.283	30.1248	567.838
Female	19	Government	No	Yes	Mid	Wifi	3G	2024-01-03	No	Mobile	0.5	No	No	0	Always	No	Yes	No	Yes	SA	Astronomy	F	22	30	10	12	Yes	Above-7	L	BA	Low	Yes	Yes	74	18.4441	56.6684	374.441	85.8919	722.539
Female	21	Non Government	No	Yes	Mid	Wifi	3G	2024-01-03	No	Mobile	1	No	Yes	0	Always	Yes	No	No	No	KW	Chemistry	F	29	22	9	20	Yes	Under-7	M	AA	High	Yes	Yes	72	25.1552	41.3715	424.059	63.2937	818.972
Female	22	Non Government	No	No	Mid	Wifi	4G	2024-01-03	No	Mobile	0.5	No	No	0	Always	Yes	No	No	Yes	LEB	Chemistry	F	11	2	2	8	No	Under-7	L	BA	Low	Yes	Yes	63	20.7601	53.4311	478.484	85.6164	778.382
Male	20	Non Government	No	Yes	Mid	Mobile Data	4G	2024-01-03	No	Mobile	0.75	No	No	12	Always	Yes	No	No	No	UAE	Engineering	F	19	30	26	19	Yes	Above-7	M	BA	High	Yes	Yes	75	19.4468	53.4707	188.98	50.0299	964.986
Female	21	Non Government	Yes	Yes	Rich	Wifi	4G	2024-03-06	No	Computer	0.5	No	No	2	Sometimes	No	No	Yes	No	SA	Engineering	F	12	0	6	13	No	Under-7	L	BB	Moderate	Yes	Yes	75	18.9234	47.8292	138.126	49.6672	877.365
Female	19	Non Government	No	No	Mid	Wifi	4G	0	No	Mobile	1	Yes	No	0	Never	No	No	Yes	No	LEB	Neuroscience	F	50	90	29	60	Yes	Under-7	M	AA	Low	Yes	Yes	74	26.3555	63.4447	706.55	54.0393	734.246
Male	19	Non Government	No	Yes	Mid	Wifi	4G	2024-01-03	No	Mobile	1	No	No	0	Never	No	No	No	No	KW	Biology	F	15	70	37	44	Yes	Under-7	M	AA	Low	Yes	Yes	48	22.0785	40.5987	583.601	72.3625	528.81
Male	20	Non Government	Yes	Yes	Mid	Wifi	4G	2024-01-03	Yes	Mobile	0.5	Yes	No	0	Always	Yes	Yes	Yes	No	LEB	Chemistry	F	20	80	33	33	Yes	Under-7	M	BB	Moderate	Yes	Yes	64	26.6972	47.9453	499.73	63.9485	670.525
Female	23	Government	No	Yes	Mid	Mobile Data	3G	2024-01-03	No	Mobile	0.25	Yes	Yes	12	Always	Yes	Yes	No	No	KW	Computer Science	F	13	3	11	9	No	Above-7	L	AA	Low	Yes	Yes	75	18.7843	51.5077	670.996	85.5213	816.029
Female	19	Non Government	No	Yes	Rich	Wifi	3G	2024-01-03	No	Mobile	0.5	No	No	2	Always	Yes	No	Yes	No	JO	Neuroscience	F	80	90	49	55	Yes	Under-7	H	BA	High	Yes	Yes	62	21.7835	56.545	844.911	31.5265	902.777
Male	18	Non Government	No	Yes	Poor	Wifi	4G	0	No	Mobile	0.5	No	No	0	Always	No	Yes	No	No	SA	English	F	8	15	10	40	Yes	Under-7	L	BB	Low	Yes	Yes	83	24.4739	61.3589	484.924	72.4918	975.842
Female	20	Non Government	No	Yes	Mid	Wifi	4G	2024-03-06	No	Tab	0.5	No	Yes	0	Always	Yes	Yes	No	No	JO	Environmental Science	F	8	25	1	70	No	Above-7	L	AA	Moderate	Yes	Yes	63	27.4887	45.7923	677.008	49.8197	763.272
Male	24	Non Government	No	Yes	Mid	Mobile Data	3G	2024-01-03	Yes	Mobile	0.5	Yes	No	0	Always	Yes	Yes	Yes	No	KW	Geology	F	7	5	2	80	Yes	Above-7	L	AA	Moderate	Yes	Yes	62	21.825	55.8419	958.215	40.814	716.152
Male	24	Government	Yes	No	Mid	Mobile Data	3G	2024-01-03	No	Mobile	0.5	No	No	0	Never	No	No	No	No	LEB	Computer Science	F	7	4	10	50	No	Above-7	M	BB	Low	Yes	Yes	73	25.5107	36.0244	855.662	60.6237	410.615
Female	20	Non Government	No	Yes	Mid	Wifi	4G	2024-03-06	No	Mobile	0.75	No	No	0	Never	No	No	Yes	Yes	LEB	Statistics	F	50	70	50	10	Yes	Above-7	H	CC	Moderate	Yes	Yes	72	28.6317	67.3059	483.401	60.3038	443.259
Male	23	Government	Yes	Yes	Mid	Mobile Data	3G	2024-01-03	No	Computer	1	Yes	Yes	0	Always	No	Yes	Yes	No	LEB	Engineering	F	1	0	1	12	No	Above-7	L	CC	Low	Yes	Yes	63	25.3904	45.3224	680.245	38.2207	493.663
Male	22	Non Government	No	Yes	Mid	Wifi	4G	2024-03-06	No	Tab	0.5	Yes	No	0	Always	No	Yes	No	No	SA	Statistics	F	70	12	40	50	Yes	Under-7	H	BB	Moderate	Yes	Yes	67	20.7955	59.1809	259.364	42.1138	432.856
Female	20	Non Government	No	Yes	Mid	Mobile Data	4G	2024-01-03	No	Mobile	0.5	No	No	2	Always	Yes	No	No	Yes	LEB	English	F	19	70	3	50	No	Under-7	L	AA	Moderate	Yes	Yes	75	18.2928	30.8136	604.47	54.4899	640.518
Male	19	Non Government	No	Yes	Mid	Mobile Data	4G	2024-01-03	No	Mobile	0.5	Yes	No	0	Always	Yes	Yes	No	No	LEB	English	F	3	12	4	33	No	Under-7	L	BA	Moderate	Yes	Yes	82	28.4412	38.2075	983.195	54.5287	602.127
Female	20	Non Government	No	Yes	Poor	Mobile Data	3G	2024-01-03	No	Mobile	0.5	No	No	2	Always	Yes	No	Yes	No	JO	Biology	F	5	20	1	50	Yes	Above-7	L	BA	Moderate	Yes	Yes	52	18.2552	49.4833	566.484	49.0535	782.412
Female	24	Non Government	No	Yes	Mid	Mobile Data	4G	2024-01-03	No	Mobile	0.75	No	No	12	Always	Yes	Yes	No	No	JO	Astronomy	F	4	8	10	60	Yes	Above-7	L	AA	Moderate	Yes	Yes	60	28.4964	65.1301	934.874	38.9127	721.399
Male	21	Non Government	Yes	Yes	Mid	Wifi	3G	2024-01-03	Yes	Mobile	0.75	Yes	No	12	Always	Yes	Yes	Yes	Yes	JO	English	F	80	90	55	19	Yes	Under-7	H	BA	Moderate	Yes	Yes	72	24.3472	51.0902	466.601	30.2624	757.582
Female	20	Government	No	Yes	Rich	Wifi	4G	2024-01-03	No	Mobile	0.5	Yes	Yes	2	Sometimes	No	No	Yes	Yes	UAE	Astronomy	F	50	70	19	15	Yes	Under-7	H	AA	Moderate	Yes	Yes	74	29.2688	67.1948	998.96	88.2141	683.186
Male	19	Non Government	No	Yes	Poor	Wifi	4G	0	No	Mobile	1	No	No	0	Always	Yes	No	Yes	Yes	OM	Mathematics	F	55	89	40	40	Yes	Under-7	H	BA	Low	Yes	Yes	79	27.5854	49.3519	621.298	86.61	566.642
Male	18	Government	No	No	Mid	Mobile Data	4G	0	No	Mobile	0.5	No	No	0	Always	No	Yes	Yes	Yes	UAE	Chemistry	F	80	44	35	10	No	Above-7	L	AA	Low	Yes	Yes	67	29.9752	49.618	138.042	59.019	971.695
Female	24	Government	No	No	Mid	Mobile Data	3G	2024-01-03	No	Mobile	0.5	No	No	2	Always	Yes	No	Yes	Yes	OM	Mathematics	F	100	80	2	70	No	Under-7	H	AA	Low	Yes	Yes	63	22.2085	34.7899	628.079	89.7031	451.845
Female	19	Non Government	No	Yes	Rich	Wifi	4G	2024-03-06	No	Tab	0.5	Yes	No	2	Always	No	Yes	No	Yes	SA	Mathematics	F	14	60	11	75	Yes	Under-7	H	AA	Moderate	Yes	Yes	83	27.2063	62.1062	347.115	70.4193	963.335
Male	24	Government	No	Yes	Mid	Wifi	4G	2024-01-03	No	Mobile	0.5	No	Yes	0	Never	No	Yes	No	Yes	UAE	Astronomy	F	6	2	38	12	No	Under-7	M	AA	Low	Yes	Yes	63	22.8232	39.8786	129.233	34.1315	586.743
Female	18	Non Government	Yes	Yes	Rich	Wifi	4G	2024-03-06	No	Computer	0.5	No	No	0	Always	Yes	No	Yes	No	OM	Engineering	F	10	3	0	30	No	Under-7	M	CB	Moderate	Yes	Yes	73	23.7585	65.9845	838.768	37.0631	707.597
Male	21	Non Government	No	Yes	Poor	Wifi	4G	0	No	Mobile	0.5	No	No	0	Always	Yes	Yes	Yes	Yes	UAE	Physics	F	50	7	9	50	Yes	Above-7	M	AA	Low	Yes	Yes	70	25.5301	66.433	348.157	84.9667	465.305
Male	21	Government	No	No	Poor	Mobile Data	4G	0	No	Mobile	0.5	No	No	8	Always	Yes	No	Yes	No	LEB	English	F	50	90	40	90	Yes	Under-7	M	BB	Low	Yes	Yes	58	28.4841	67.7324	816.894	67.8031	442.559
Male	20	Non Government	Yes	No	Mid	Mobile Data	3G	2024-01-03	Yes	Computer	0.5	No	No	0	Always	Yes	Yes	No	No	SA	Geology	F	70	92	50	7	Yes	Under-7	H	CC	Moderate	Yes	Yes	64	29.809	50.8092	359.396	80.591	657.727
Male	18	Non Government	Yes	Yes	Mid	Wifi	3G	2024-01-03	No	Computer	0.5	No	No	0	Always	No	Yes	Yes	Yes	SA	Engineering	F	2	6	2	8	No	Above-7	L	BB	Moderate	Yes	Yes	72	27.2193	57.0838	274.894	83.8962	845.018
Female	19	Non Government	No	Yes	Mid	Wifi	4G	2024-01-03	No	Computer	0.5	No	Yes	0	Always	No	No	Yes	No	LEB	Neuroscience	F	1	7	6	10	No	Above-7	L	AA	Moderate	Yes	Yes	72	23.0132	61.1406	976.542	56.8765	561.619
Male	23	Non Government	No	Yes	Mid	Mobile Data	3G	2024-01-03	No	Mobile	0.75	No	No	2	Never	Yes	No	Yes	Yes	UAE	Chemistry	F	0	12	3	3	Yes	Above-7	M	BA	Moderate	Yes	Yes	73	23.0563	35.2406	425.481	32.9116	737.409
Male	19	Government	Yes	Yes	Rich	Wifi	4G	2024-01-03	No	Computer	0.5	No	No	2	Sometimes	Yes	Yes	Yes	Yes	LEB	Chemistry	F	0	0	5	80	Yes	Above-7	L	AA	High	Yes	Yes	55	26.851	54.0383	641.239	41.2968	567.19
Male	18	Government	No	No	Mid	Mobile Data	3G	0	No	Mobile	0.5	Yes	Yes	0	Always	Yes	Yes	No	No	OM	Biology	F	12	26	7	40	Yes	Under-7	M	CB	Low	Yes	Yes	64	20.8653	31.3719	648.983	33.9943	633.168
Male	18	Government	No	No	Mid	Wifi	4G	0	No	Mobile	0.5	Yes	No	2	Always	Yes	Yes	Yes	No	UAE	Biology	F	70	90	41	33	Yes	Under-7	H	AA	Low	Yes	Yes	60	19.3257	49.9026	604.426	41.3244	943.868
Male	18	Non Government	Yes	Yes	Mid	Mobile Data	3G	2024-03-06	Yes	Mobile	0.5	No	Yes	2	Always	Yes	Yes	Yes	No	UAE	Physics	F	7	12	5	3	No	Above-7	M	CC	Moderate	Yes	Yes	81	22.2555	36.1937	923.226	54.632	913.504
Female	20	Non Government	Yes	Yes	Mid	Wifi	3G	2024-03-06	Yes	Mobile	0.5	No	No	12	Never	No	Yes	No	Yes	UAE	Biology	F	90	70	30	14	No	Under-7	M	BB	Moderate	Yes	Yes	75	21.4469	37.3169	706.997	37.0918	709.611
Female	18	Non Government	Yes	Yes	Mid	Wifi	4G	2024-01-03	No	Computer	0.5	Yes	No	8	Always	No	Yes	Yes	No	JO	English	F	70	88	55	40	Yes	Under-7	H	BB	Moderate	Yes	Yes	80	21.5557	44.6019	463.36	40.004	542.863
Male	21	Non Government	No	Yes	Mid	Mobile Data	4G	2024-01-03	No	Mobile	0.5	No	Yes	0	Always	Yes	Yes	Yes	No	SA	Materials Science	F	77	80	51	80	No	Under-7	M	CC	High	Yes	Yes	72	20.8033	47.2975	876.142	56.7493	515.91
Male	20	Government	No	Yes	Mid	Wifi	4G	2024-01-03	No	Mobile	0.5	Yes	Yes	0	Always	Yes	Yes	No	No	LEB	Geology	F	2	5	3	50	No	Above-7	L	CB	High	Yes	Yes	48	18.5051	54.9269	262.957	50.4103	972.452
Female	22	Government	No	Yes	Mid	Wifi	3G	0	Yes	Mobile	0.5	No	No	12	Always	Yes	Yes	Yes	No	UAE	Physics	F	25	27	0	69	No	Above-7	L	BB	Low	Yes	Yes	63	18.2145	32.9771	589.813	58.0595	521.63
Female	18	Non Government	Yes	Yes	Mid	Mobile Data	3G	2024-01-03	No	Mobile	0.5	No	Yes	0	Always	Yes	Yes	No	No	UAE	Astronomy	F	11	2	0	50	No	Above-7	L	CC	Moderate	Yes	Yes	75	29.8527	50.1477	955.495	55.7503	884.901
Male	22	Non Government	Yes	Yes	Mid	Wifi	4G	2024-03-06	Yes	Computer	0.5	No	No	12	Sometimes	Yes	6	Yes	No	SA	Materials Science	F	0	8	11	70	Yes	Above-7	L	BA	Low	Yes	Yes	70	23.1333	37.305	662.858	68.6687	621.382
Male	20	Non Government	No	Yes	Mid	Mobile Data	4G	2024-01-03	No	Mobile	0.5	No	Yes	2	Always	No	Yes	Yes	No	LEB	Environmental Science	F	77	80	12	19	Yes	Above-7	M	CC	High	Yes	Yes	66	22.6119	52.959	835.272	86.2314	991.396
Male	22	Government	No	Yes	Mid	Mobile Data	4G	2024-01-03	No	Mobile	0.5	No	No	0	Never	No	No	Yes	Yes	SA	Astronomy	F	25	29	40	17	No	Under-7	H	BB	Moderate	Yes	Yes	72	26.1558	55.4962	688.205	36.4719	620.893
Female	24	Non Government	No	Yes	Mid	Mobile Data	3G	2024-01-03	No	Mobile	0.75	No	No	2	Always	Yes	Yes	Yes	No	JO	Mathematics	F	24	35	23	22	Yes	Above-7	M	CC	Moderate	Yes	Yes	64	20.619	52.2684	855.434	35.9556	610.91
Male	20	Government	No	No	Poor	Mobile Data	2G	2024-01-03	No	Mobile	1	No	No	0	Always	Yes	No	No	Yes	SA	Engineering	F	60	60	3	60	No	Under-7	M	BB	Low	Yes	Yes	63	29.3995	59.5318	950.039	81.1684	782.478
Female	18	Non Government	No	No	Mid	Mobile Data	3G	2024-03-06	Yes	Mobile	0.5	No	No	12	Always	Yes	No	No	No	UAE	Mathematics	F	21	12	0	50	Yes	Under-7	M	BA	Low	Yes	Yes	55	27.4361	43.4244	345.63	60.3838	976.91
Male	21	Government	No	Yes	Mid	Wifi	4G	2024-03-06	No	Mobile	0.5	No	No	0	Always	Yes	No	No	No	LEB	Computer Science	F	0	4	8	30	No	Above-7	L	CC	Moderate	Yes	Yes	66	19.0729	60.6043	252.695	75.9843	985.726
Male	24	Non Government	No	No	Mid	Wifi	4G	0	No	Mobile	0.5	Yes	Yes	12	Always	No	No	No	No	UAE	Materials Science	F	66	90	55	12	Yes	Above-7	M	AA	Moderate	Yes	Yes	64	23.011	47.3107	535.592	42.9253	824.324
Male	20	Non Government	No	Yes	Mid	Mobile Data	4G	2024-01-03	No	Mobile	0.75	Yes	No	0	Always	Yes	No	Yes	No	UAE	Physics	F	70	98	7	5	Yes	Under-7	M	CC	Moderate	Yes	Yes	68	28.5494	49.3674	731.676	79.7318	852.764
Female	24	Non Government	Yes	No	Poor	Mobile Data	3G	2024-01-03	Yes	Mobile	0.75	No	No	0	Always	Yes	No	No	Yes	SA	Engineering	F	0	6	4	15	Yes	Under-7	L	CC	Moderate	Yes	Yes	67	29.3368	55.9241	304.472	85.4308	738.041
Male	18	Non Government	No	Yes	Rich	Wifi	4G	2024-01-03	No	Mobile	0.75	No	Yes	0	Always	Yes	Yes	Yes	Yes	SA	Chemistry	F	12	30	0	17	No	Above-7	L	DD	Moderate	Yes	Yes	71	23.6088	30.7343	103.691	68.129	853.465
Male	23	Government	Yes	No	Mid	Mobile Data	4G	0	No	Mobile	0.75	No	No	0	Always	No	Yes	Yes	No	JO	Mathematics	F	2	9	7	55	Yes	Under-7	M	DC	Low	Yes	Yes	72	25.3609	56.1598	408.642	36.3527	915.868
Male	22	Non Government	Yes	Yes	Mid	Mobile Data	4G	2024-01-03	No	Mobile	0.5	No	Yes	0	Always	No	Yes	Yes	Yes	UAE	Chemistry	F	55	33	6	9	No	Above-7	L	DC	Moderate	Yes	Yes	58	20.0044	54.7434	971.973	83.7177	691.657
Male	20	Government	No	Yes	Mid	Mobile Data	4G	0	No	Mobile	0.75	No	No	0	Always	No	Yes	Yes	No	UAE	Astronomy	F	12	10	20	16	No	Under-7	L	DC	Low	Yes	Yes	75	29.894	42.3939	725.471	77.5493	771.917
Female	22	Government	No	No	Mid	Mobile Data	3G	2024-01-03	No	Mobile	0.75	No	No	0	Always	Yes	No	No	No	KW	Physics	F	70	90	2	2	Yes	Under-7	L	DD	Low	Yes	Yes	71	20.7801	33.4318	461.193	75.0527	722.39
Male	18	Non Government	No	Yes	Mid	Mobile Data	3G	2024-01-03	No	Mobile	0.75	No	Yes	0	Always	No	Yes	No	No	SA	English	F	7	9	5	30	No	Above-7	L	DD	Moderate	Yes	Yes	53	29.3128	33.6374	273.318	32.2037	737.482
Male	22	Non Government	No	Yes	Poor	Mobile Data	3G	2024-01-03	No	Mobile	0.25	No	Yes	2	Always	Yes	Yes	No	No	UAE	Statistics	F	80	42	20	50	Yes	Under-7	M	CB	Low	Yes	Yes	63	25.7958	66.9289	420.481	77.9378	934.029
Female	18	Non Government	No	No	Mid	Mobile Data	3G	2024-03-06	Yes	Mobile	0.25	No	No	2	Sometimes	No	6	No	Yes	SA	Computer Science	S	0	3	10	3	No	Above-7	L	DD	Low	Yes	Yes	70	25.2928	57.5712	252.855	38.2771	613.37
Male	24	Government	No	Yes	Mid	Wifi	4G	2024-01-03	No	Mobile	0.75	Yes	Yes	0	Always	Yes	Yes	Yes	No	UAE	Mathematics	S	12	60	0	70	Yes	Above-7	L	CB	Moderate	Yes	Yes	63	24.1523	35.0841	195.675	43.3432	524.91
Female	20	Non Government	No	No	Mid	Mobile Data	4G	2024-01-03	No	Mobile	0.75	No	No	0	Always	Yes	Yes	Yes	No	OM	Environmental Science	S	80	80	15	70	Yes	Under-7	H	BB	Low	Yes	Yes	74	20.768	44.2689	916.068	64.6281	673.768
Female	18	Non Government	Yes	Yes	Rich	Wifi	4G	2024-03-06	No	Computer	0.5	Yes	No	0	Sometimes	Yes	Yes	Yes	Yes	KW	Materials Science	S	70	80	95	70	Yes	Under-7	H	CB	High	Yes	Yes	67	20.1183	53.6993	997.885	45.8988	524.851
Female	22	Non Government	Yes	Yes	Mid	Wifi	3G	2024-03-06	Yes	Mobile	0.5	Yes	No	0	Always	No	Yes	No	No	JO	Chemistry	S	70	80	95	70	Yes	Under-7	H	BB	Moderate	Yes	Yes	58	20.6458	63.4229	247.703	69.6809	699.04
Male	23	Non Government	Yes	Yes	Rich	Wifi	4G	2024-03-06	No	Mobile	0.75	Yes	No	2	Always	Yes	No	Yes	No	OM	Chemistry	F	60	80	50	40	No	Under-7	M	DD	Low	Yes	Yes	64	20.2373	31.7464	149.07	66.4842	942.105
Female	23	Non Government	No	No	Mid	Wifi	4G	2024-03-06	No	Mobile	0.5	No	No	12	Always	Yes	Yes	No	Yes	JO	Environmental Science	F	100	80	95	90	No	Under-7	H	DD	Moderate	Yes	Yes	57	27.355	39.4653	396.758	36.489	770.46
Female	18	Non Government	No	Yes	Poor	Wifi	3G	2024-01-03	No	Mobile	0.5	Yes	No	12	Always	No	Yes	No	No	JO	Materials Science	F	100	85	85	70	No	Under-7	M	DD	Moderate	Yes	Yes	58	22.2015	65.59	515.493	69.3609	913.26
Male	19	Non Government	No	Yes	Poor	Wifi	4G	0	No	Mobile	1	No	No	2	Always	Yes	Yes	Yes	No	OM	Computer Science	F	10	60	5	20	Yes	Above-7	L	CB	Low	Yes	Yes	75	18.6941	30.3666	284.339	85.4373	499.715
Female	23	Non Government	No	Yes	Mid	Mobile Data	4G	2024-01-03	No	Mobile	0.75	No	No	0	Never	No	No	Yes	Yes	SA	Statistics	S	19	65	50	10	No	Above-7	L	CC	Moderate	Yes	Yes	62	29.6292	38.056	371.282	39.6666	940.524
Female	20	Government	No	Yes	Mid	Wifi	4G	2024-01-03	No	Mobile	0.5	No	Yes	2	Always	Yes	No	No	Yes	SA	Biology	S	10	75	55	11	Yes	Under-7	M	DC	Moderate	Yes	Yes	63	28.6054	68.361	280.784	65.8237	761.072
Female	23	Non Government	Yes	Yes	Mid	Mobile Data	3G	2024-01-03	No	Mobile	0.75	No	Yes	0	Always	Yes	Yes	No	Yes	LEB	Statistics	S	80	90	55	19	Yes	Under-7	H	DC	Moderate	Yes	Yes	85	29.133	54.5361	796.835	50.5119	419.056
Male	20	Non Government	No	Yes	Rich	Mobile Data	3G	2024-01-03	No	Mobile	0.5	No	No	0	Always	Yes	No	No	No	OM	Chemistry	S	10	10	15	19	No	Above-7	L	DC	Moderate	Yes	Yes	74	29.9389	40.4669	741.32	57.5767	779.871
Male	24	Government	No	No	Mid	Wifi	4G	2024-01-03	No	Mobile	0.5	No	Yes	0	Sometimes	No	No	Yes	Yes	LEB	English	S	70	75	55	11	Yes	Under-7	M	DC	Moderate	Yes	Yes	75	20.0867	32.6796	671.456	47.22	970.838
Female	20	Non Government	No	Yes	Mid	Wifi	3G	2024-01-03	No	Mobile	1	Yes	Yes	0	Always	No	Yes	Yes	No	SA	Geology	S	100	75	50	70	Yes	Under-7	H	DC	High	Yes	Yes	57	22.7549	31.1277	448.496	51.2478	447.5
Female	19	Non Government	No	Yes	Poor	Mobile Data	3G	2024-01-03	No	Mobile	0.5	No	No	0	Always	Yes	No	No	No	JO	English	S	10	79	30	30	No	Under-7	M	DD	Moderate	Yes	Yes	75	27.0989	39.7898	918.137	31.7347	749.474
Male	20	Non Government	No	Yes	Mid	Mobile Data	3G	2024-01-03	No	Mobile	None	Yes	No	0	Always	No	Yes	No	No	JO	Mathematics	S	60	55	30	40	No	Under-7	M	CB	Low	Yes	Yes	75	26.3522	65.2594	972.579	88.8931	949.287
Male	19	Non Government	No	Yes	Poor	Mobile Data	4G	2024-03-06	No	Mobile	0.5	No	No	0	Always	Yes	No	No	No	LEB	Biology	S	100	75	50	70	Yes	Under-7	H	DC	Moderate	Yes	Yes	63	19.8468	46.6365	256.275	67.488	405.817
Male	23	Government	No	Yes	Mid	Wifi	3G	2024-01-03	Yes	Mobile	1	Yes	Yes	0	Sometimes	No	No	No	Yes	JO	Materials Science	S	80	80	51	59	Yes	Under-7	H	CC	Moderate	Yes	Yes	64	27.79	58.8133	300.711	60.0423	778.548
Male	18	Government	No	No	Poor	Mobile Data	3G	2024-01-03	No	Mobile	0.75	No	Yes	0	Sometimes	No	No	No	No	OM	English	S	23	63	71	89	Yes	Under-7	M	DD	Moderate	Yes	Yes	74	20.6933	66.7314	573.068	53.0229	684.941
Male	20	Non Government	No	No	Mid	Mobile Data	3G	2024-01-03	No	Mobile	0.75	Yes	No	0	Always	No	No	Yes	No	LEB	Statistics	S	100	91	98	40	Yes	Under-7	H	DC	Low	Yes	Yes	71	20.6858	46.3216	182.126	62.3625	608.194
Male	18	Non Government	No	Yes	Poor	Mobile Data	3G	2024-01-03	No	Mobile	0.75	No	Yes	0	Never	No	No	No	Yes	SA	Astronomy	S	10	51	40	40	No	Above-7	L	DD	Low	Yes	Yes	75	24.4437	37.6511	492.804	52.8064	776.522
Female	21	Non Government	No	Yes	Rich	Wifi	3G	2024-01-03	No	Mobile	0.5	No	No	0	Never	No	No	No	Yes	LEB	Physics	S	70	50	33	41	No	Above-7	M	DD	High	Yes	Yes	73	25.1153	50.6847	623.612	51.5945	431.621
Female	23	Non Government	No	Yes	Poor	Mobile Data	3G	2024-01-03	No	Mobile	0.75	No	No	0	Sometimes	No	Yes	Yes	Yes	KW	Computer Science	S	70	58	73	91	Yes	Under-7	H	DC	Low	Yes	Yes	82	24.961	66.3233	569.866	57.8368	851.838
Male	20	Government	No	Yes	Mid	Mobile Data	4G	2024-01-03	No	Mobile	0.75	No	No	2	Always	No	No	Yes	Yes	JO	Neuroscience	S	70	50	30	49	Yes	Under-7	M	DD	Moderate	Yes	Yes	63	19.0978	62.175	397.818	46.559	402.688
Female	19	Government	No	Yes	Mid	Mobile Data	4G	2024-01-03	Yes	Mobile	0.5	No	No	0	Always	No	No	Yes	Yes	OM	Astronomy	S	70	50	33	40	No	Under-7	M	DD	Moderate	Yes	Yes	72	28.5295	32.6332	588.201	40.803	584.161
Female	21	Non Government	No	No	Mid	Wifi	4G	2024-03-06	No	Mobile	0.75	No	No	12	Always	No	Yes	Yes	No	SA	Environmental Science	S	22	51	48	10	No	Above-7	L	DD	Moderate	Yes	Yes	59	21.1872	57.7029	962.921	63.3964	702.375
Female	20	Non Government	Yes	Yes	Mid	Mobile Data	3G	2024-01-03	No	Mobile	0.5	No	No	0	Sometimes	No	Yes	No	Yes	UAE	Astronomy	S	62	68	48	80	Yes	Under-7	M	BB	Moderate	Yes	Yes	75	19.5542	52.8759	285.416	80.5659	626.213
Female	23	Non Government	No	Yes	Mid	Mobile Data	4G	2024-01-03	No	Mobile	0.75	Yes	Yes	0	Always	Yes	No	No	No	LEB	English	S	82	89	58	50	Yes	Under-7	H	DD	Moderate	Yes	Yes	65	28.665	66.2985	689.348	39.1697	584.486
Male	21	Non Government	No	Yes	Mid	Mobile Data	4G	2024-01-03	No	Mobile	0.75	No	Yes	0	Always	No	No	No	Yes	LEB	Environmental Science	S	72	80	58	66	No	Under-7	M	DD	Moderate	Yes	Yes	75	29.4678	34.8993	139.057	31.9641	898.501
Male	24	Government	No	Yes	Mid	Wifi	4G	2024-01-03	No	Mobile	0.75	Yes	Yes	0	Always	No	Yes	Yes	No	LEB	Physics	S	70	82	3	73	No	Under-7	H	DC	Moderate	Yes	Yes	80	28.3455	51.3614	159.775	44.8087	960.9
Male	21	Government	Yes	Yes	Mid	Wifi	4G	2024-01-03	Yes	Tab	1	No	Yes	2	Sometimes	Yes	Yes	No	Yes	JO	Materials Science	S	60	82	93	43	No	Above-7	M	DC	Moderate	Yes	Yes	81	27.7142	65.1785	596.645	88.7832	924.228
Male	22	Non Government	Yes	No	Mid	Mobile Data	3G	2024-03-06	No	Computer	0.5	No	Yes	0	Sometimes	No	Yes	No	Yes	OM	Astronomy	S	55	72	83	14	Yes	Above-7	M	DD	Low	Yes	Yes	67	25.8629	46.401	194.445	79.7255	713.459
Female	24	Government	No	Yes	Rich	Wifi	4G	2024-01-03	No	Mobile	0.5	No	No	2	Never	No	Yes	No	Yes	LEB	Physics	S	72	65	73	66	Yes	Under-7	H	BA	Moderate	Yes	Yes	56	24.6103	49.2798	120.112	65.752	930.499
Male	19	Non Government	Yes	No	Mid	Mobile Data	3G	2024-03-06	No	Computer	1	No	Yes	0	Always	No	No	Yes	Yes	UAE	Computer Science	S	51	82	53	43	No	Under-7	M	BA	Low	Yes	Yes	68	19.0438	32.8184	254.362	85.7549	952.517
Male	24	Government	No	Yes	Mid	Mobile Data	4G	0	No	Mobile	0.5	Yes	No	0	3	No	Yes	Yes	Yes	OM	Neuroscience	S	80	92	83	43	Yes	Under-7	H	BA	Low	Yes	Yes	47	22.9014	41.1257	608.364	56.7167	645.543
Male	22	Non Government	No	Yes	Mid	Wifi	4G	2024-01-03	No	Mobile	0.5	No	No	0	Never	No	Yes	No	Yes	KW	English	S	60	52	23	33	Yes	Under-7	H	AA	Moderate	Yes	Yes	72	22.4723	42.9803	733.007	88.9968	570.068
Male	18	Non Government	No	Yes	Poor	Mobile Data	3G	2024-01-03	No	Mobile	1	Yes	Yes	8	Always	Yes	Yes	Yes	Yes	JO	Materials Science	S	30	12	29	23	No	Under-7	M	BA	Moderate	Yes	Yes	67	21.117	67.8049	282.231	47.7781	458.959
Male	21	Non Government	No	Yes	Poor	Wifi	4G	2024-01-03	No	Mobile	1	Yes	No	0	Always	Yes	Yes	Yes	Yes	SA	Biology	S	40	62	83	33	Yes	Under-7	H	AA	Low	Yes	Yes	66	26.681	41.3067	701.433	44.4183	687.455
Female	23	Non Government	No	Yes	Mid	Wifi	4G	2024-01-03	No	Mobile	1	No	No	0	Always	Yes	Yes	Yes	No	UAE	Physics	S	60	52	23	33	No	Under-7	M	AA	Low	Yes	Yes	58	23.9505	48.4347	264.229	68.2829	967.778
Male	22	Government	No	Yes	Mid	Mobile Data	3G	2024-01-03	No	Mobile	0.5	No	Yes	0	Always	No	Yes	No	Yes	SA	Computer Science	S	20	22	53	13	No	Above-7	L	AA	Moderate	Yes	Yes	73	18.9726	56.8522	652.112	52.6892	736.545
Female	18	Non Government	No	Yes	Mid	Mobile Data	4G	2024-01-03	No	Mobile	1	No	Yes	0	Never	No	Yes	No	No	SA	Physics	S	20	52	23	33	Yes	Above-7	L	AA	Moderate	Yes	Yes	70	20.6422	36.4873	470.764	67.5819	800.537
Female	18	Non Government	No	Yes	Mid	Wifi	4G	2024-01-03	No	Mobile	0.75	No	Yes	0	Always	No	No	Yes	Yes	UAE	Chemistry	S	50	62	73	43	Yes	Above-7	M	BA	Low	Yes	Yes	50	26.1991	49.4577	688.42	48.2997	467.73
Female	18	Non Government	Yes	Yes	Mid	Wifi	4G	2024-01-03	No	Computer	0.5	Yes	Yes	2	Sometimes	No	No	Yes	Yes	OM	Engineering	S	10	2	13	53	No	Above-7	L	AA	Moderate	Yes	Yes	67	18.9136	59.5416	995.547	67.0751	486.112
Female	19	Non Government	No	Yes	Mid	Wifi	4G	2024-03-06	No	Computer	0.5	Yes	Yes	0	Sometimes	Yes	Yes	Yes	No	OM	Chemistry	S	60	52	23	33	Yes	Under-7	H	Fail	Moderate	No	No	66	28.2145	64.6742	944.035	46.5448	678.684
Female	22	Non Government	No	No	Mid	Wifi	4G	2024-01-03	No	Mobile	1	No	Yes	0	Always	Yes	No	Yes	Yes	JO	Chemistry	S	15	52	83	11	Yes	Under-7	M	BA	Moderate	Yes	Yes	83	23.9418	55.0504	103.854	33.0583	970.759
Female	20	Non Government	Yes	No	Mid	Mobile Data	3G	2024-01-03	Yes	Mobile	0.5	No	No	12	Always	Yes	No	No	No	JO	Engineering	S	80	42	33	13	Yes	Under-7	H	AA	Moderate	Yes	Yes	68	23.767	56.7621	896.895	84.7282	616.471
Male	19	Government	No	Yes	Mid	Wifi	4G	0	No	Mobile	0.75	Yes	Yes	0	Always	No	No	Yes	Yes	SA	Engineering	S	40	51	20	33	No	Under-7	M	BB	Low	Yes	Yes	66	25.1089	35.0513	159.842	82.9923	926.49
Female	19	Non Government	Yes	No	Mid	Mobile Data	3G	2024-01-03	Yes	Mobile	1	Yes	Yes	0	Always	No	Yes	Yes	No	JO	Chemistry	S	60	70	63	93	Yes	Under-7	H	BA	Moderate	Yes	Yes	70	27.8962	67.8311	957.742	88.2479	472.173
Male	20	Non Government	No	Yes	Rich	Mobile Data	3G	2024-01-03	No	Mobile	0.75	Yes	Yes	12	Sometimes	No	Yes	6	Yes	LEB	Materials Science	S	50	62	13	33	No	Above-7	L	BB	High	Yes	Yes	70	22.1737	35.303	353.643	72.9916	770.21
Female	23	Government	No	Yes	Mid	Mobile Data	4G	2024-01-03	No	Mobile	0.75	No	No	0	Never	No	No	No	Yes	LEB	Geology	S	85	75	62	53	Yes	Under-7	H	AA	Low	Yes	Yes	75	26.1362	60.9869	443.831	70.9633	760.368
Female	20	Non Government	No	No	Mid	Mobile Data	3G	2024-03-06	Yes	Mobile	0.75	No	Yes	0	Never	No	No	No	Yes	SA	Chemistry	S	25	15	32	53	No	Under-7	M	Fail	Low	No	No	61	24.7888	40.5927	182.474	63.5402	915.925
Male	19	Government	No	No	Mid	Wifi	4G	2024-01-03	No	Mobile	0.5	Yes	Yes	0	Always	Yes	Yes	Yes	No	UAE	Neuroscience	S	10	35	30	13	No	Above-7	L	BB	Low	Yes	Yes	77	21.2043	67.3437	201.045	37.5565	401.99
Male	22	Government	Yes	Yes	Mid	Wifi	4G	2024-01-03	Yes	Tab	0.5	Yes	Yes	0	Always	Yes	Yes	No	No	OM	Neuroscience	S	87	65	82	33	Yes	Under-7	H	AA	Moderate	Yes	Yes	58	28.5436	58.7984	754.067	41.3541	513.959
Male	19	Non Government	No	Yes	Mid	Wifi	4G	2024-03-06	No	Computer	1	No	Yes	0	Sometimes	No	Yes	Yes	Yes	KW	Chemistry	S	85	15	22	53	Yes	Under-7	M	CB	Moderate	Yes	Yes	78	27.5691	60.1525	949.899	47.3682	531.813
Female	24	Non Government	No	Yes	Mid	Mobile Data	4G	2024-01-03	No	Mobile	1	No	Yes	0	Always	No	Yes	No	No	KW	Biology	S	80	71	52	51	Yes	Under-7	M	BB	Moderate	Yes	Yes	64	25.9014	38.7624	649.674	83.4094	969.98
Male	21	Government	No	Yes	Mid	Mobile Data	4G	2024-01-03	No	Mobile	1	No	No	0	Always	Yes	Yes	Yes	Yes	JO	Computer Science	S	75	71	72	53	Yes	Under-7	H	BB	Moderate	Yes	Yes	54	28.207	47.7216	744.265	40.3782	492.216
Female	24	Non Government	No	No	Mid	Mobile Data	3G	2024-01-03	Yes	Mobile	0.75	No	Yes	0	Sometimes	No	Yes	Yes	Yes	KW	Geology	S	85	66	12	23	No	Under-7	M	AA	Low	Yes	Yes	74	28.4075	54.7125	785.773	85.3724	422.177
Female	24	Government	No	No	Mid	Mobile Data	4G	2024-01-03	No	Mobile	0.5	Yes	Yes	0	Never	No	No	Yes	Yes	UAE	Mathematics	S	23	25	32	53	No	Under-7	L	BA	Low	Yes	Yes	61	26.5004	60.7989	336.533	61.3671	720.677
Female	24	Government	No	Yes	Mid	Wifi	4G	2024-01-03	No	Mobile	0.5	Yes	Yes	0	Sometimes	No	No	Yes	No	KW	Materials Science	S	15	25	37	13	Yes	Above-7	L	Fail	Low	No	No	63	28.0442	34.1584	140.707	72.9342	717.135
Female	23	Non Government	No	Yes	Mid	Mobile Data	4G	2024-01-03	No	Mobile	1	No	Yes	0	Always	Yes	No	No	Yes	JO	Computer Science	S	95	91	62	53	Yes	Under-7	M	BA	Moderate	Yes	Yes	78	26.3697	68.4946	101.685	36.6147	906.428
Female	24	Non Government	Yes	Yes	Mid	Mobile Data	4G	2024-01-03	No	Mobile	0.75	Yes	Yes	12	Sometimes	No	No	Yes	Yes	KW	Computer Science	S	81	75	62	53	No	Under-7	M	Fail	Moderate	No	No	67	26.1617	65.6088	415.584	46.142	969.316
Male	18	Non Government	Yes	No	Mid	Mobile Data	3G	2024-03-06	No	Computer	0.75	Yes	No	2	Sometimes	No	No	Yes	Yes	SA	Computer Science	S	53	75	72	23	No	Under-7	M	Fail	Low	No	No	73	25.4233	40.8139	317.318	87.5111	723.127
Female	23	Non Government	No	Yes	Poor	Mobile Data	4G	2024-01-03	No	Mobile	0.5	Yes	Yes	0	Always	No	Yes	No	Yes	JO	Environmental Science	S	15	43	42	33	Yes	Under-7	M	CC	Moderate	Yes	Yes	72	27.0326	62.9104	156.086	45.969	957.997
Male	22	Government	Yes	Yes	Mid	Wifi	4G	0	No	Mobile	0.75	No	No	0	Never	No	Yes	Yes	No	LEB	Astronomy	S	92	65	62	53	Yes	Under-7	H	CC	Moderate	Yes	Yes	68	19.9033	50.733	261.575	47.7913	835.095
Male	24	Government	Yes	Yes	Rich	Wifi	4G	2024-01-03	No	Computer	0.75	No	No	0	Always	Yes	No	No	No	OM	Statistics	S	83	75	62	53	No	Under-7	H	AA	High	Yes	Yes	78	28.5704	48.4723	212.049	41.8558	558.735
Female	22	Government	No	No	Mid	Mobile Data	2G	2024-01-03	No	Mobile	0.75	Yes	Yes	12	Sometimes	No	Yes	No	Yes	LEB	Geology	S	27	15	42	53	No	Above-7	L	CB	Low	Yes	Yes	67	28.4621	42.5774	923.391	37.7444	957.052
Male	21	Non Government	No	Yes	Poor	Mobile Data	3G	2024-01-03	No	Mobile	1	No	No	12	Always	Yes	No	Yes	No	LEB	Chemistry	S	45	95	12	13	No	Under-7	M	BB	Moderate	Yes	Yes	74	18.351	53.2387	226.24	43.9955	800.466
Male	19	Non Government	Yes	No	Mid	Mobile Data	3G	2024-01-03	Yes	Mobile	0.5	Yes	No	0	Always	Yes	Yes	No	No	UAE	Environmental Science	S	15	90	52	83	Yes	Under-7	H	AA	Moderate	Yes	Yes	64	27.9098	59.1956	583.884	68.5396	648.458
Female	20	Government	No	No	Mid	Mobile Data	3G	2024-01-03	No	Mobile	0.5	Yes	No	0	Always	Yes	No	Yes	Yes	UAE	Materials Science	S	45	58	52	43	Yes	Under-7	H	AA	Low	Yes	Yes	63	19.5464	46.4373	633.795	57.3221	808.145
Female	23	Non Government	Yes	No	Poor	Mobile Data	3G	2024-01-03	Yes	Mobile	0.5	No	No	2	Never	No	No	No	Yes	UAE	Materials Science	S	25	5	12	33	Yes	Under-7	M	AA	Moderate	Yes	Yes	70	22.0214	55.1688	589.141	63.2254	640.788
Male	19	Non Government	No	Yes	Mid	Mobile Data	4G	2024-03-06	No	Mobile	0.5	Yes	No	2	Always	No	Yes	No	No	SA	Chemistry	S	22	51	42	40	Yes	Under-7	M	AA	Moderate	Yes	Yes	79	26.9221	57.9725	189.151	37.3419	468.51
Male	23	Non Government	No	Yes	Mid	Mobile Data	4G	2024-03-06	No	Mobile	0.5	No	No	12	Always	Yes	No	Yes	Yes	JO	Physics	S	29	10	12	24	No	Above-7	L	AA	Moderate	Yes	Yes	55	19.9291	58.4449	386.919	78.127	831.387
Male	20	Non Government	Yes	No	Mid	Mobile Data	3G	2024-01-03	Yes	Mobile	0.5	No	No	2	Always	Yes	No	Yes	Yes	LEB	Astronomy	S	72	51	42	24	Yes	Above-7	H	BA	Moderate	Yes	Yes	60	27.8156	32.0786	146.143	77.0457	894.453
Female	21	Non Government	No	Yes	Mid	Wifi	4G	2024-01-03	No	Computer	0.75	No	No	0	Always	No	Yes	Yes	Yes	KW	Engineering	S	67	31	42	14	Yes	Under-7	M	CC	Moderate	Yes	Yes	71	27.9856	64.3899	456.103	31.2954	837.284
Female	20	Government	No	Yes	Mid	Mobile Data	4G	2024-01-03	No	Mobile	0.5	Yes	Yes	2	Sometimes	No	Yes	Yes	Yes	JO	Engineering	S	17	21	42	14	Yes	Under-7	M	BA	Low	Yes	Yes	64	24.0896	48.3301	269.739	53.0109	537.469
Male	21	Non Government	Yes	No	Mid	Wifi	4G	2024-03-06	Yes	Computer	0.5	No	Yes	0	Always	No	No	No	Yes	JO	Materials Science	S	27	41	49	14	No	Under-7	M	CC	Moderate	Yes	Yes	68	18.0766	40.4966	605.469	34.1262	973.981
Female	22	Non Government	No	No	Mid	Mobile Data	3G	2024-03-06	Yes	Mobile	0.5	No	No	12	Never	No	Yes	No	No	JO	Chemistry	S	70	81	39	84	No	Under-7	M	Fail	Low	No	No	70	21.4445	39.6706	723.528	77.5263	415.153
Male	18	Non Government	Yes	No	Poor	Mobile Data	3G	2024-03-06	Yes	Mobile	0.5	No	No	12	Sometimes	No	No	No	Yes	JO	Neuroscience	S	27	90	82	14	Yes	Under-7	H	BA	Moderate	Yes	Yes	85	25.4031	49.3206	578.908	74.2362	599.611
Male	20	Government	Yes	Yes	Rich	Wifi	4G	2024-01-03	No	Mobile	0.75	Yes	Yes	8	Sometimes	No	Yes	No	Yes	KW	Geology	S	17	61	42	14	No	Under-7	M	Fail	High	No	No	76	29.7742	65.4733	490.813	84.1193	556.055
Male	22	Government	No	No	Mid	Mobile Data	4G	2024-01-03	No	Mobile	0.75	No	No	0	Always	Yes	No	No	No	UAE	English	S	87	81	42	19	Yes	Under-7	H	Fail	Low	No	No	80	25.5818	45.1339	448.6	44.1842	428.876
Female	20	Government	No	No	Mid	Mobile Data	4G	2024-01-03	No	Mobile	1	No	No	0	Always	Yes	No	No	Yes	SA	Geology	S	7	61	22	14	No	Above-7	L	AA	Low	Yes	Yes	73	21.1176	59.989	857.523	57.3778	643.438
Male	24	Government	No	Yes	Mid	Mobile Data	4G	2024-03-06	No	Mobile	0.75	Yes	Yes	12	Never	No	No	Yes	Yes	OM	Environmental Science	S	17	50	2	4	No	Above-7	L	BA	Moderate	Yes	Yes	71	25.6081	33.8727	297.431	41.0693	773.869
Female	23	Non Government	No	Yes	Poor	Mobile Data	3G	2024-01-03	No	Mobile	0.5	No	No	0	Always	No	Yes	No	Yes	OM	Materials Science	S	5	21	42	14	No	Above-7	L	BA	Low	Yes	Yes	79	24.4798	49.0423	760.797	52.2741	929.532
Male	18	Government	Yes	Yes	Rich	Wifi	4G	2024-01-03	No	Computer	1	No	Yes	0	Always	Yes	No	No	No	JO	Neuroscience	S	27	41	32	61	Yes	Above-7	M	AA	High	Yes	Yes	81	27.3581	69.6674	781.734	61.3346	993.814
Male	19	Government	No	No	Mid	Mobile Data	3G	0	No	Mobile	0.5	No	No	0	Always	Yes	No	No	Yes	SA	Statistics	S	87	88	40	10	Yes	Under-7	M	BA	Low	Yes	Yes	78	19.2838	60.8175	477.28	33.1998	884.854
Male	19	Non Government	No	Yes	Mid	Mobile Data	4G	2024-01-03	No	Mobile	0.75	No	No	12	Always	Yes	No	No	No	UAE	Biology	S	96	61	42	94	Yes	Under-7	H	BA	Moderate	Yes	Yes	64	27.1323	38.4211	367.571	72.8922	681.208
Female	20	Non Government	No	Yes	Rich	Wifi	3G	2024-01-03	No	Mobile	0.5	No	No	2	Sometimes	No	No	Yes	No	UAE	Geology	S	57	51	46	34	Yes	Under-7	M	BB	High	Yes	Yes	70	24.4952	50.0577	523.487	62.5976	834.223
Male	23	Government	No	No	Mid	Mobile Data	4G	0	No	Mobile	1	Yes	No	0	Never	No	No	Yes	No	SA	Environmental Science	S	77	69	41	13	Yes	Under-7	M	AA	Low	Yes	Yes	67	29.5559	39.345	183.893	79.7375	906.174
Male	21	Government	Yes	Yes	Mid	Mobile Data	4G	2024-01-03	Yes	Mobile	1	No	No	0	Never	No	No	No	No	LEB	Astronomy	S	80	51	40	24	No	Under-7	M	AA	Low	Yes	Yes	71	22.1025	46.3824	141.337	46.3068	679.184
Male	24	Non Government	Yes	No	Mid	Mobile Data	3G	2024-01-03	Yes	Computer	0.5	Yes	No	0	Always	Yes	Yes	Yes	No	UAE	Engineering	S	62	61	82	40	Yes	Under-7	M	BB	Moderate	Yes	Yes	63	25.5915	61.2034	200.443	84.1993	871.033
Female	23	Government	No	No	Poor	Mobile Data	4G	0	No	Mobile	0.25	Yes	Yes	12	Always	Yes	Yes	No	No	KW	Environmental Science	S	72	83	12	90	Yes	Under-7	H	AA	Low	Yes	Yes	71	29.1843	60.849	268.431	89.9217	689.591
Male	18	Non Government	No	Yes	Mid	Mobile Data	3G	2024-01-03	No	Mobile	0.5	No	No	2	Always	Yes	No	Yes	No	JO	Computer Science	S	87	81	22	70	Yes	Under-7	H	BA	Moderate	Yes	Yes	74	19.2301	39.124	553.759	85.1579	631.898
Female	18	Non Government	No	Yes	Poor	Mobile Data	3G	2024-01-03	No	Mobile	0.5	No	No	0	Always	No	Yes	No	No	KW	Physics	S	72	90	12	30	No	Under-7	M	BB	Low	Yes	Yes	72	29.2467	66.8889	864.223	76.6735	715.655
Male	21	Non Government	No	Yes	Mid	Mobile Data	3G	2024-01-03	No	Mobile	0.5	No	Yes	0	Always	Yes	Yes	No	No	OM	Statistics	S	2	11	62	30	No	Under-7	L	AA	Moderate	Yes	Yes	106	26.2546	53.7027	312.078	78.7421	805.513
Female	22	Non Government	No	No	Mid	Wifi	4G	2024-01-03	No	Mobile	0.5	Yes	No	0	Always	Yes	Yes	Yes	No	OM	English	S	5	3	2	10	Yes	Under-7	L	AA	Low	Yes	Yes	73	18.814	45.197	941.646	64.4247	836.129
Male	21	Non Government	No	Yes	Rich	Wifi	4G	2024-01-03	No	Mobile	0.5	No	No	0	Never	No	No	No	No	JO	English	S	73	84	77	81	Yes	Above-7	H	BB	Moderate	Yes	Yes	81	21.6116	50.0774	959.417	41.4092	614.042
Female	21	Non Government	Yes	Yes	Mid	Wifi	4G	2024-01-03	No	Mobile	0.75	No	No	0	Never	No	No	Yes	Yes	SA	Chemistry	S	5	17	21	10	No	Above-7	L	CC	Low	Yes	Yes	74	26.4981	54.2029	963.014	70.6224	742.792
Male	20	Non Government	Yes	Yes	Mid	Wifi	3G	2024-01-03	Yes	Mobile	1	Yes	Yes	0	Always	No	Yes	Yes	No	UAE	Physics	S	51	42	12	29	No	Above-7	M	CC	Moderate	Yes	Yes	78	18.8082	52.3956	853.806	72.7652	945.923
Male	22	Non Government	No	Yes	Mid	Mobile Data	3G	2024-01-03	No	Mobile	0.5	Yes	No	0	Always	No	Yes	No	No	SA	Biology	S	9	7	21	20	Yes	Above-7	L	BB	Moderate	Yes	Yes	92	24.986	49.4562	427.443	89.1231	985.788
Male	24	Government	No	No	Mid	Wifi	4G	2024-01-03	No	Mobile	0.5	No	No	2	Always	Yes	No	No	Yes	JO	Statistics	F	19	72	15	50	Yes	Above-7	M	AA	Low	Yes	Yes	68	22.1506	50.1973	165.416	62.4781	536.349
Male	24	Non Government	Yes	Yes	Poor	Wifi	4G	2024-01-03	Yes	Computer	0.5	Yes	No	0	Always	Yes	Yes	No	No	JO	Environmental Science	S	32	80	58	46	Yes	Above-7	M	BA	High	Yes	Yes	74	25.451	37.0565	611.937	46.2821	515.699
Male	20	Non Government	No	No	Mid	Mobile Data	3G	2024-01-03	No	Mobile	0.5	No	No	2	Always	Yes	No	Yes	No	KW	Engineering	S	32	60	58	66	Yes	Above-7	M	BA	Low	Yes	Yes	67	18.5489	62.5093	602.813	71.0204	806.011
Male	22	Non Government	Yes	Yes	Poor	Wifi	4G	2024-01-03	Yes	Computer	0.75	No	No	12	Always	Yes	Yes	No	No	LEB	Neuroscience	S	12	8	18	26	No	Above-7	L	AA	High	Yes	Yes	79	28.4584	51.6704	864.978	88.7625	648.81
Male	23	Government	No	No	Mid	Mobile Data	3G	2024-01-03	No	Mobile	0.75	Yes	No	12	Always	Yes	Yes	Yes	Yes	LEB	Neuroscience	S	52	10	13	6	No	Above-7	L	BA	Low	Yes	Yes	54	29.6819	35.2432	996.392	40.6328	414.533
Male	21	Non Government	Yes	Yes	Mid	Mobile Data	4G	2024-03-06	No	Computer	0.5	Yes	Yes	2	Sometimes	No	No	Yes	Yes	LEB	Mathematics	S	72	80	58	66	Yes	Above-7	M	AA	Moderate	Yes	Yes	79	29.6265	60.6463	557.342	49.5599	608.117
Male	23	Government	Yes	No	Mid	Mobile Data	4G	0	No	Mobile	1	No	No	0	Always	Yes	No	Yes	Yes	UAE	English	S	72	80	58	66	Yes	Above-7	M	BA	Low	Yes	Yes	65	26.9958	67.2978	410.684	62.5129	884.047
Male	19	Non Government	Yes	Yes	Mid	Wifi	4G	2024-03-06	No	Computer	0.5	No	No	0	Always	No	Yes	Yes	Yes	JO	Astronomy	S	92	80	88	76	Yes	Under-7	H	AA	Low	Yes	Yes	70	19.561	67.8923	267.312	40.2129	878.456
Female	21	Non Government	No	Yes	Mid	Wifi	4G	2024-01-03	No	Mobile	0.5	No	No	2	Always	Yes	No	Yes	Yes	UAE	Astronomy	S	72	80	98	96	Yes	Under-7	H	AA	Low	Yes	Yes	61	27.0992	44.7607	104.32	31.3332	696.811
Female	22	Non Government	No	No	Mid	Wifi	4G	2024-03-06	No	Mobile	0.5	Yes	No	2	Always	No	Yes	No	Yes	JO	Neuroscience	S	72	80	58	86	Yes	Under-7	M	AA	Moderate	Yes	Yes	78	18.295	35.4207	558.202	50.219	683.547
Male	21	Non Government	No	Yes	Mid	Mobile Data	3G	2024-01-03	No	Mobile	0.5	No	Yes	0	Never	No	Yes	No	Yes	KW	Physics	S	22	20	18	6	No	Above-7	L	AA	Moderate	Yes	Yes	84	18.2655	50.736	599.967	81.9222	747.704
Female	21	Non Government	No	No	Mid	Wifi	4G	2024-01-03	No	Mobile	0.5	No	No	0	Always	Yes	No	Yes	No	JO	Astronomy	S	12	20	38	46	No	Above-7	M	CB	Low	Yes	Yes	66	21.8833	34.5044	842.445	32.6081	531.638
Female	20	Non Government	No	Yes	Poor	Mobile Data	3G	2024-01-03	No	Mobile	0.5	No	No	0	Always	Yes	Yes	Yes	Yes	OM	English	S	70	92	83	85	Yes	Under-7	H	AA	Moderate	Yes	Yes	64	23.8637	67.3595	554.119	55.7357	715.626
Male	24	Non Government	No	Yes	Mid	Wifi	4G	2024-03-06	No	Tab	0.5	No	No	8	Always	Yes	No	Yes	No	SA	Neuroscience	S	50	40	52	66	Yes	Under-7	M	BB	Moderate	Yes	Yes	58	27.2449	37.3432	924.822	75.732	406.628
Male	20	Non Government	No	Yes	Mid	Mobile Data	4G	2024-01-03	Yes	Mobile	0.5	No	No	0	Always	Yes	Yes	No	No	KW	Neuroscience	S	80	94	62	77	Yes	Under-7	H	CC	Moderate	Yes	Yes	53	26.1995	40.1106	665.275	87.191	685.336
Male	22	Government	No	Yes	Mid	Wifi	4G	2024-01-03	No	Mobile	0.5	No	No	0	Always	No	Yes	Yes	Yes	LEB	Computer Science	S	87	48	82	96	No	Above-7	M	BB	Moderate	Yes	Yes	81	23.3508	46.2655	856.303	89.1285	601.631
Female	20	Non Government	No	Yes	Mid	Mobile Data	4G	2024-01-03	No	Mobile	0.5	No	Yes	0	Always	No	No	Yes	No	UAE	Engineering	S	70	40	2	16	No	Above-7	L	AA	Moderate	Yes	Yes	64	21.2835	45.3266	233.472	55.3182	804.922
Male	18	Non Government	No	Yes	Poor	Mobile Data	3G	0	No	Mobile	0.75	No	No	2	Never	Yes	No	Yes	Yes	OM	Astronomy	S	65	86	62	40	No	Above-7	M	BA	Low	Yes	Yes	98	29.9655	61.7865	869.803	87.0231	783.012
Male	22	Non Government	No	Yes	Poor	Mobile Data	3G	2024-01-03	No	Mobile	0.5	No	No	2	Sometimes	Yes	Yes	Yes	Yes	OM	Biology	S	15	6	32	40	Yes	Under-7	H	AA	Low	Yes	Yes	72	23.1142	48.2527	707.629	32.1251	628.502
Male	19	Non Government	No	Yes	Mid	Wifi	4G	0	No	Mobile	0.5	Yes	Yes	0	Always	Yes	Yes	No	No	JO	Engineering	S	19	74	32	17	No	Above-7	L	CB	Low	Yes	Yes	63	23.4166	36.8307	253.21	74.755	404.364
Female	23	Non Government	No	Yes	Mid	Wifi	4G	2024-01-03	No	Mobile	0.5	Yes	No	2	Always	Yes	Yes	Yes	No	JO	Materials Science	S	69	76	82	94	No	Under-7	M	AA	Moderate	Yes	Yes	80	19.9635	40.6884	270.787	68.5648	551.364
Female	22	Government	No	Yes	Mid	Wifi	4G	2024-01-03	No	Mobile	0.5	No	Yes	2	Always	Yes	Yes	Yes	No	UAE	Environmental Science	S	39	26	12	44	No	Above-7	L	CC	Low	Yes	Yes	72	27.5377	50.3645	933.851	44.9713	780.009
Female	21	Non Government	No	Yes	Mid	Mobile Data	3G	2024-01-03	No	Mobile	0.5	No	No	12	Never	No	Yes	No	Yes	OM	English	S	59	97	42	70	Yes	Under-7	H	BB	Moderate	Yes	Yes	63	26.3242	35.8982	128.994	60.4391	443.424
Female	21	Government	No	Yes	Mid	Wifi	4G	2024-01-03	No	Mobile	0.5	Yes	No	8	Always	No	Yes	Yes	No	UAE	Chemistry	S	10	17	12	40	Yes	Under-7	H	BB	Low	Yes	Yes	71	20.6492	54.4662	516.281	37.7732	464.585
Female	18	Non Government	No	Yes	Mid	Wifi	4G	2024-01-03	No	Mobile	0.5	No	Yes	0	Always	Yes	Yes	Yes	No	SA	Neuroscience	S	80	87	72	60	No	Under-7	H	CC	Low	Yes	Yes	50	18.9886	52.6299	382.128	82.2958	788.221
Female	19	Non Government	Yes	Yes	Mid	Mobile Data	3G	2024-01-03	No	Mobile	0.5	Yes	Yes	0	Always	Yes	Yes	No	No	JO	Materials Science	S	70	99	66	65	No	Under-7	M	CB	Moderate	Yes	Yes	58	26.166	58.5881	698.57	51.4739	853.46
Female	24	Non Government	No	No	Mid	Wifi	4G	2024-01-03	No	Mobile	0.5	No	No	12	Always	Yes	Yes	Yes	No	SA	Physics	S	80	97	86	95	Yes	Under-7	M	BB	Low	Yes	Yes	66	25.8541	67.5082	855.666	67.5627	592.93
Male	21	Non Government	No	Yes	Poor	Mobile Data	3G	2024-01-03	No	Mobile	0.5	No	Yes	0	Always	Yes	Yes	No	No	SA	Materials Science	S	69	34	12	17	No	Above-7	L	CC	Moderate	Yes	Yes	81	21.2791	66.4902	424.34	39.5266	693.804
Male	19	Non Government	No	Yes	Poor	Wifi	4G	2024-01-03	No	Mobile	0.5	No	No	12	Sometimes	Yes	6	Yes	No	SA	Mathematics	S	10	17	12	14	No	Above-7	L	BA	Low	Yes	Yes	63	29.4104	67.843	484.212	42.3699	967.427
Female	22	Government	Yes	Yes	Poor	Mobile Data	4G	0	No	Computer	0.5	No	Yes	2	Always	No	Yes	Yes	No	LEB	Statistics	S	61	97	82	64	Yes	Above-7	M	CC	Low	Yes	Yes	92	19.8127	39.7886	983.726	89.5174	967.326
Male	18	Government	No	No	Mid	Wifi	4G	2024-01-03	No	Mobile	0.5	No	No	0	Never	No	No	Yes	Yes	LEB	Environmental Science	S	21	27	52	34	Yes	Above-7	M	BB	Low	Yes	Yes	78	23.188	35.2626	805.525	75.1852	584.502
Female	24	Non Government	No	Yes	Mid	Wifi	4G	2024-01-03	No	Mobile	0.75	No	No	2	Always	Yes	Yes	Yes	No	LEB	Statistics	S	49	94	42	7	No	Above-7	M	CC	Low	Yes	Yes	85	29.3234	42.0911	907.484	87.7183	885.993
Male	20	Non Government	No	Yes	Mid	Wifi	4G	2024-03-06	No	Mobile	1	No	No	0	Always	Yes	No	No	Yes	UAE	English	F	70	64	42	32	No	Under-7	M	BB	Moderate	Yes	Yes	68	23.0367	65.8034	494.886	47.7511	756.366
Male	20	Non Government	No	Yes	Rich	Wifi	4G	2024-01-03	No	Mobile	0.5	No	No	12	Always	Yes	No	No	No	KW	Materials Science	S	79	84	82	37	No	Under-7	H	BA	High	Yes	Yes	70	25.6623	68.8821	310.669	39.8738	985.291
Male	20	Government	No	Yes	Mid	Mobile Data	4G	0	No	Mobile	0.5	No	No	0	Always	Yes	No	No	No	OM	Engineering	F	19	80	12	17	Yes	Above-7	M	CC	Low	Yes	Yes	76	22.7711	64.373	470.677	60.1841	686.568
Male	23	Non Government	No	No	Mid	Mobile Data	3G	2024-03-06	Yes	Mobile	0.5	Yes	Yes	12	Always	No	No	No	No	UAE	Materials Science	S	11	70	32	29	Yes	Above-7	M	AA	Low	Yes	Yes	77	21.2906	34.4007	744.483	59.6801	864.824
Male	22	Non Government	No	Yes	Mid	Mobile Data	3G	2024-01-03	No	Mobile	0.75	Yes	No	0	Always	Yes	No	Yes	No	UAE	Biology	F	10	8	10	10	Yes	Above-7	M	CC	Moderate	Yes	Yes	80	29.8077	67.8971	198.487	40.4968	860.882
Male	23	Government	No	Yes	Mid	Wifi	4G	2024-03-06	No	Mobile	0.75	No	No	0	Always	Yes	No	No	Yes	LEB	Computer Science	S	18	28	40	20	Yes	Above-7	M	CC	Moderate	Yes	Yes	59	22.912	46.9343	343.422	73.9932	698.46
Male	21	Non Government	No	Yes	Mid	Mobile Data	4G	2024-01-03	No	Mobile	0.75	No	Yes	0	Always	Yes	Yes	Yes	Yes	LEB	Neuroscience	F	90	84	52	30	No	Under-7	H	DD	Moderate	Yes	Yes	74	28.7292	30.3724	141.972	51.7067	877.378
Male	20	Non Government	No	Yes	Mid	Mobile Data	4G	2024-01-03	No	Mobile	0.75	No	No	0	Always	No	Yes	Yes	No	LEB	Materials Science	S	92	81	32	36	No	Under-7	M	DC	Moderate	Yes	Yes	70	20.7595	47.6957	489.113	41.1819	556.624
Male	20	Non Government	Yes	Yes	Mid	Wifi	4G	2024-03-06	No	Computer	0.5	No	Yes	0	Always	No	Yes	Yes	Yes	KW	Materials Science	F	42	21	2	16	No	Under-7	M	DC	Moderate	Yes	Yes	65	20.5573	31.8428	844.701	49.919	473.352
Male	20	Non Government	No	Yes	Mid	Mobile Data	4G	2024-01-03	No	Mobile	0.75	No	No	0	Always	No	Yes	Yes	No	SA	Chemistry	S	22	20	6	26	No	Under-7	H	DC	Moderate	Yes	Yes	68	18.3736	51.7551	122.197	63.8195	655.098
Male	20	Non Government	No	Yes	Mid	Wifi	4G	2024-03-06	No	Mobile	0.75	No	No	0	Always	Yes	No	No	No	OM	Engineering	F	95	82	82	70	Yes	Under-7	H	DD	Moderate	Yes	Yes	68	25.82	43.5422	707.791	73.5883	966.178
Male	23	Non Government	No	Yes	Mid	Mobile Data	3G	2024-01-03	No	Mobile	0.75	No	Yes	0	Always	No	Yes	No	No	SA	Mathematics	S	90	62	80	60	Yes	Under-7	H	DD	Moderate	Yes	Yes	72	22.4223	48.9374	939.246	58.9135	700.447
Male	19	Non Government	No	No	Mid	Mobile Data	4G	2024-01-03	No	Mobile	0.25	No	Yes	2	Always	Yes	Yes	No	No	SA	Statistics	F	72	21	22	26	Yes	Under-7	H	CB	Low	Yes	Yes	68	28.3723	54.5268	313.235	61.5357	781.155
Female	21	Non Government	Yes	Yes	Mid	Mobile Data	4G	2024-01-03	No	Mobile	0.25	No	No	2	Sometimes	No	6	No	Yes	KW	Geology	S	92	31	42	27	Yes	Under-7	H	DD	Moderate	Yes	Yes	48	23.6785	64.752	724.271	38.3368	774.497
Female	19	Non Government	No	Yes	Mid	Wifi	4G	2024-01-03	No	Mobile	0.75	Yes	Yes	0	Always	Yes	Yes	Yes	No	LEB	Astronomy	F	82	31	52	25	No	Under-7	M	CB	Moderate	Yes	Yes	63	29.6183	56.4761	977.592	84.8815	479.544
Male	22	Non Government	No	Yes	Poor	Mobile Data	3G	2024-01-03	No	Mobile	0.75	No	No	0	Always	Yes	Yes	Yes	No	SA	Physics	S	72	41	46	27	No	Under-7	M	BB	Low	Yes	Yes	63	20.2263	47.362	966.05	85.7235	634.178
Male	23	Non Government	Yes	Yes	Mid	Wifi	3G	2024-03-06	Yes	Mobile	0.5	Yes	No	0	Sometimes	Yes	Yes	Yes	Yes	SA	Materials Science	F	74	71	56	37	No	Under-7	H	CB	Moderate	Yes	Yes	80	28.4235	62.7771	311.436	71.0056	824.163
Male	24	Government	Yes	Yes	Mid	Mobile Data	4G	2024-01-03	No	Mobile	0.5	Yes	No	0	Always	No	Yes	No	No	JO	Geology	S	74	60	56	37	No	Under-7	H	BB	Moderate	Yes	Yes	57	27.3192	66.2233	190.298	31.0579	983.194
Male	23	Non Government	No	Yes	Poor	Mobile Data	3G	2024-01-03	No	Mobile	0.75	Yes	No	2	Always	Yes	No	Yes	No	OM	Geology	F	95	94	72	80	No	Under-7	H	DD	High	Yes	Yes	54	27.2511	34.7904	233.454	62.2245	500.811
Male	24	Government	No	No	Poor	Mobile Data	4G	2024-01-03	No	Mobile	0.5	No	No	12	Always	Yes	Yes	No	Yes	LEB	Geology	S	97	87	82	86	No	Under-7	H	DD	Low	Yes	Yes	64	28.1374	51.2773	731.832	67.7531	646.265
Female	20	Government	No	Yes	Mid	Wifi	3G	2024-01-03	No	Mobile	0.5	Yes	No	12	Always	No	Yes	No	No	SA	Computer Science	F	40	38	32	36	No	Above-7	M	DD	Low	Yes	Yes	60	27.1323	41.3805	753.183	89.6793	457.056
Male	24	Non Government	No	Yes	Mid	Wifi	4G	2024-03-06	Yes	Computer	1	No	No	2	Always	Yes	Yes	Yes	No	UAE	Engineering	S	41	39	35	39	Yes	Above-7	M	CB	Moderate	Yes	Yes	54	25.5146	31.8824	706.813	89.764	545.426
Male	23	Non Government	Yes	Yes	Mid	Wifi	4G	2024-01-03	Yes	Mobile	0.75	No	No	0	Never	No	No	Yes	Yes	JO	Geology	F	51	79	85	89	Yes	Under-7	H	CC	Moderate	Yes	Yes	65	19.5749	56.7419	402.471	81.4567	626.056
Male	21	Non Government	No	Yes	Poor	Mobile Data	3G	0	No	Mobile	0.5	No	Yes	2	Always	Yes	No	No	Yes	JO	Engineering	S	81	79	91	85	Yes	Under-7	H	DC	Low	Yes	Yes	80	18.3903	64.5108	252.799	33.8299	724.386
Male	20	Non Government	No	Yes	Mid	Mobile Data	4G	2024-01-03	No	Mobile	0.75	No	Yes	0	Always	Yes	Yes	No	Yes	UAE	Biology	F	71	70	65	69	Yes	Under-7	M	DC	Moderate	Yes	Yes	80	29.0502	36.5161	622.685	87.1966	538.34
Male	18	Non Government	Yes	Yes	Mid	Wifi	3G	2024-03-06	Yes	Computer	0.5	No	No	0	Always	Yes	No	No	No	JO	Astronomy	S	75	71	76	80	Yes	Under-7	M	DC	Low	Yes	Yes	71	25.3998	62.4965	535.312	66.7597	536.538
Male	23	Non Government	Yes	Yes	Mid	Wifi	4G	2024-01-03	No	Computer	0.5	No	Yes	0	Sometimes	No	No	Yes	Yes	UAE	Engineering	F	49	36	32	44	No	Above-7	L	DC	Moderate	Yes	Yes	63	27.5584	64.1358	755.951	78.0532	866.698
Male	18	Non Government	No	Yes	Poor	Mobile Data	4G	2024-01-03	No	Mobile	1	Yes	Yes	0	Always	No	Yes	Yes	No	LEB	Geology	S	42	24	12	24	No	Above-7	L	DC	Moderate	Yes	Yes	60	23.7783	66.5736	497.224	54.4316	977.585
Male	23	Non Government	No	Yes	Mid	Mobile Data	3G	2024-01-03	No	Mobile	0.5	No	No	0	Always	Yes	No	No	No	SA	Chemistry	F	90	86	82	74	Yes	Under-7	H	DD	Moderate	Yes	Yes	69	19.4077	40.6114	404.776	49.1802	594.168
Male	22	Non Government	No	Yes	Mid	Mobile Data	4G	2024-01-03	No	Mobile	None	Yes	No	0	Always	No	Yes	No	No	UAE	Biology	S	62	64	72	84	Yes	Under-7	H	CB	Moderate	Yes	Yes	57	19.5022	66.1581	364.131	57.7946	812.795
Male	21	Non Government	Yes	Yes	Mid	Wifi	3G	2024-03-06	Yes	Computer	0.5	No	No	0	Always	Yes	No	No	No	LEB	Chemistry	F	90	86	82	74	Yes	Above-7	M	DC	Low	Yes	Yes	83	26.2268	42.8265	290.323	38.8125	554.848
Male	23	Government	No	Yes	Mid	Wifi	4G	2024-01-03	No	Mobile	1	Yes	Yes	0	Sometimes	No	No	No	Yes	KW	Chemistry	S	62	64	72	84	Yes	Above-7	M	CC	Low	Yes	Yes	73	23.1637	52.0935	339.172	51.424	956.771
Female	24	Non Government	No	Yes	Mid	Mobile Data	4G	2024-01-03	No	Mobile	0.75	No	Yes	0	Sometimes	No	No	No	No	KW	Materials Science	F	98	87	86	84	No	Under-7	H	DD	Moderate	Yes	Yes	80	20.4063	32.0203	185.347	81.457	803.741
Female	23	Non Government	Yes	Yes	Mid	Mobile Data	3G	2024-03-06	Yes	Mobile	0.75	Yes	No	0	Always	No	No	Yes	No	OM	Neuroscience	S	72	74	82	89	No	Under-7	H	DC	Moderate	Yes	Yes	63	23.8991	31.7552	412.171	32.277	881.606
Female	19	Government	Yes	No	Poor	Mobile Data	4G	2024-01-03	No	Mobile	0.75	No	Yes	0	Never	No	No	No	Yes	JO	Statistics	F	18	17	26	34	No	Above-7	M	DD	Moderate	Yes	Yes	74	18.7705	58.8149	132.913	39.0527	429.612
Male	23	Non Government	No	Yes	Poor	Mobile Data	4G	2024-01-03	No	Mobile	0.5	No	No	0	Never	No	No	No	Yes	KW	Computer Science	S	32	14	32	29	No	Above-7	M	DD	Low	Yes	Yes	64	24.9837	47.7792	267.772	37.507	759.104
Male	22	Non Government	No	Yes	Mid	Mobile Data	4G	2024-01-03	No	Mobile	0.75	No	No	0	Sometimes	No	Yes	Yes	Yes	OM	Mathematics	F	10	12	20	13	No	Above-7	L	DC	Moderate	Yes	Yes	70	21.2279	40.2517	772.093	54.1845	716.567
Male	22	Government	No	Yes	Mid	Mobile Data	4G	0	No	Mobile	0.75	No	No	2	Always	No	No	Yes	Yes	OM	English	S	22	34	15	9	No	Above-7	L	DD	Low	Yes	Yes	52	27.5707	37.6165	392.922	89.8192	575.798
Male	21	Non Government	Yes	Yes	Mid	Mobile Data	3G	2024-01-03	No	Mobile	0.5	No	No	0	Always	No	No	Yes	Yes	KW	Materials Science	F	11	20	21	23	No	Under-7	M	DD	Low	Yes	Yes	97	21.7243	56.7981	701.413	40.4015	557.458
Male	21	Non Government	No	No	Mid	Mobile Data	3G	0	No	Mobile	0.75	No	No	12	Always	No	Yes	Yes	No	SA	Computer Science	S	12	44	25	39	No	Under-7	M	DD	Low	Yes	Yes	61	23.4626	30.0161	745.196	38.729	748.015
Male	20	Government	No	No	Poor	Mobile Data	3G	0	No	Mobile	0.5	No	No	0	Sometimes	No	Yes	No	Yes	LEB	Biology	F	15	50	24	43	Yes	Under-7	M	BB	Low	Yes	Yes	84	18.1394	62.2356	623.067	84.9033	823.891
Female	21	Non Government	No	Yes	Mid	Wifi	4G	2024-03-06	No	Mobile	0.75	Yes	Yes	0	Always	Yes	No	No	No	SA	Neuroscience	S	32	44	29	89	Yes	Under-7	M	DD	Moderate	Yes	Yes	57	18.8694	33.17	962.828	82.923	419.904
Male	23	Government	No	No	Mid	Mobile Data	4G	0	No	Mobile	0.75	No	Yes	0	Always	No	No	No	Yes	OM	Statistics	F	65	59	74	83	Yes	Under-7	H	DD	Low	Yes	Yes	69	22.7099	37.6596	119.296	31.9344	740.441
Male	18	Non Government	No	Yes	Mid	Mobile Data	3G	2024-01-03	Yes	Mobile	0.75	Yes	Yes	0	Always	No	Yes	Yes	No	OM	English	S	72	64	59	89	Yes	Under-7	H	DC	Moderate	Yes	Yes	66	23.7593	45.4495	764.787	75.1024	502.276
Male	19	Non Government	Yes	Yes	Mid	Mobile Data	4G	2024-01-03	No	Mobile	1	No	Yes	2	Sometimes	Yes	Yes	No	Yes	KW	Biology	F	95	57	74	89	Yes	Above-7	M	DC	Moderate	Yes	Yes	78	25.2002	49.3943	962.908	69.3279	484.218
Male	24	Non Government	No	Yes	Poor	Wifi	4G	2024-01-03	No	Mobile	0.5	No	Yes	0	Sometimes	No	Yes	No	Yes	SA	Computer Science	S	82	84	79	79	Yes	Above-7	M	DD	Low	Yes	Yes	73	21.5	44.1998	876.045	76.0644	773.872
Male	23	Government	No	No	Mid	Mobile Data	4G	2024-01-03	No	Mobile	0.5	No	No	2	Never	No	Yes	No	Yes	JO	Computer Science	F	25	29	34	33	No	Above-7	M	BA	High	Yes	Yes	56	26.3398	42.8285	251.103	59.6701	586.522
Male	21	Non Government	No	Yes	Mid	Mobile Data	3G	2024-01-03	No	Mobile	1	No	Yes	0	Always	No	No	Yes	Yes	OM	Physics	S	42	34	29	39	No	Above-7	M	BA	Moderate	Yes	Yes	68	28.3215	68.5566	394.138	89.4828	664.528
Male	22	Government	No	No	Mid	Mobile Data	3G	0	No	Mobile	0.5	Yes	No	0	3	No	Yes	Yes	Yes	SA	Neuroscience	F	55	79	44	43	Yes	Under-7	H	BA	Low	Yes	Yes	82	27.3582	55.6632	255.207	32.6308	615.999
Female	20	Government	No	Yes	Mid	Wifi	4G	2024-01-03	No	Mobile	0.5	No	No	0	Never	No	Yes	No	Yes	KW	Physics	S	62	64	69	49	Yes	Under-7	H	AA	Low	Yes	Yes	63	18.4754	30.9373	641.178	44.0623	789.002
Female	24	Non Government	Yes	Yes	Mid	Mobile Data	4G	2024-01-03	No	Mobile	1	Yes	Yes	8	Always	Yes	Yes	Yes	Yes	KW	Mathematics	F	78	88	74	83	Yes	Under-7	H	BA	Moderate	Yes	Yes	97	23.7661	47.207	740.969	53.7928	682.072
Male	18	Government	No	No	Poor	Mobile Data	3G	2024-01-03	Yes	Mobile	1	Yes	No	0	Always	Yes	Yes	Yes	Yes	SA	Mathematics	S	72	84	89	89	Yes	Under-7	H	AA	Low	Yes	Yes	83	19.2592	65.0003	385.366	56.9867	978.075
Female	24	Government	No	No	Mid	Mobile Data	4G	0	No	Mobile	1	No	No	0	Always	Yes	Yes	Yes	No	OM	Statistics	F	60	92	83	23	Yes	Under-7	H	AA	Low	Yes	Yes	71	20.9045	42.0582	585.556	85.282	611.43
Male	24	Government	No	Yes	Mid	Mobile Data	4G	0	No	Mobile	0.5	No	Yes	0	Always	No	Yes	No	Yes	KW	Neuroscience	S	50	90	83	13	Yes	Under-7	H	AA	Low	Yes	Yes	67	29.84	33.7823	721.829	63.6003	844.171
Male	21	Non Government	No	Yes	Poor	Mobile Data	3G	2024-01-03	No	Mobile	1	No	Yes	0	Never	No	Yes	No	No	JO	Geology	F	60	97	13	3	Yes	Under-7	H	AA	Low	Yes	Yes	65	19.7099	60.3354	479.206	32.7067	554.376
Male	20	Non Government	Yes	Yes	Mid	Mobile Data	4G	2024-01-03	No	Mobile	0.75	No	Yes	0	Always	No	No	Yes	Yes	SA	Geology	S	50	95	23	10	Yes	Under-7	H	BA	Moderate	Yes	Yes	57	23.9867	54.2406	868.614	54.4718	705.252
Male	21	Non Government	No	Yes	Mid	Mobile Data	2G	2024-01-03	No	Mobile	0.5	Yes	Yes	2	Sometimes	No	No	Yes	Yes	LEB	Neuroscience	F	60	87	23	11	Yes	Above-7	M	AA	Low	Yes	Yes	62	25.4179	52.8125	794.395	54.9894	731.542
Male	18	Non Government	No	Yes	Mid	Mobile Data	3G	2024-01-03	Yes	Mobile	0.5	Yes	Yes	0	Sometimes	Yes	Yes	Yes	No	UAE	Mathematics	S	50	80	20	15	Yes	Above-7	M	Fail	Moderate	No	No	62	26.4296	32.1431	158.199	87.9295	597.466
Male	23	Government	No	No	Mid	Mobile Data	4G	0	No	Mobile	1	No	Yes	0	Always	Yes	No	Yes	Yes	SA	English	F	10	15	10	21	No	Above-7	L	BA	Low	Yes	Yes	78	24.7158	35.62	659.013	65.9518	683.068
Female	21	Non Government	No	Yes	Mid	Mobile Data	4G	2024-03-06	No	Mobile	0.5	No	No	12	Always	Yes	No	No	No	LEB	Biology	S	30	10	20	5	No	Above-7	L	AA	Moderate	Yes	Yes	72	18.1173	54.902	311.793	68.1391	567.567
Male	18	Non Government	No	Yes	Mid	Mobile Data	4G	2024-01-03	No	Mobile	0.75	Yes	Yes	0	Always	No	No	Yes	Yes	UAE	Materials Science	F	24	35	18	31	No	Under-7	M	BB	Moderate	Yes	Yes	70	21.9175	38.313	601.766	72.7952	403.6
Female	23	Non Government	No	Yes	Poor	Mobile Data	3G	2024-01-03	No	Mobile	1	Yes	Yes	0	Always	No	Yes	Yes	No	KW	English	S	27	20	33	35	No	Under-7	M	BA	Low	Yes	Yes	61	24.2125	50.1628	961.2	76.2024	529.389
Male	22	Non Government	No	Yes	Mid	Mobile Data	4G	2024-03-06	No	Mobile	0.75	Yes	Yes	12	Sometimes	No	Yes	6	Yes	LEB	English	F	10	15	10	21	No	Above-7	L	BB	Moderate	Yes	Yes	58	19.0544	51.7953	891.156	68.1031	820.039
Male	19	Non Government	Yes	Yes	Mid	Wifi	4G	2024-01-03	No	Computer	0.75	No	No	0	Never	No	No	No	Yes	UAE	Astronomy	S	30	10	20	5	No	Above-7	L	AA	Moderate	Yes	Yes	74	22.2075	41.3403	464.065	44.2317	862.578
Male	23	Government	No	No	Mid	Mobile Data	3G	0	No	Mobile	0.75	No	Yes	0	Never	No	No	No	Yes	JO	Computer Science	F	80	77	63	83	Yes	Under-7	M	Fail	Low	No	No	68	18.3984	67.937	362.362	82.4428	568.122
Male	24	Non Government	No	Yes	Poor	Mobile Data	4G	2024-01-03	No	Mobile	0.5	Yes	Yes	0	Always	Yes	Yes	Yes	No	OM	Physics	S	75	85	73	80	Yes	Under-7	M	BB	Moderate	Yes	Yes	61	18.9429	63.6986	310.965	73.9272	644.826
Male	22	Non Government	No	Yes	Mid	Mobile Data	3G	2024-01-03	No	Mobile	0.5	Yes	Yes	0	Always	Yes	Yes	No	No	JO	Environmental Science	F	40	7	50	41	No	Above-7	L	AA	Moderate	Yes	Yes	76	22.7631	58.8949	579.263	74.5122	422.419
Male	24	Non Government	No	Yes	Mid	Mobile Data	4G	2024-01-03	No	Mobile	1	No	Yes	0	Sometimes	No	Yes	Yes	Yes	OM	Physics	S	35	2	29	33	No	Above-7	L	CB	High	Yes	Yes	70	19.5926	33.1198	202.824	89.7934	542.238
Male	20	Non Government	Yes	Yes	Mid	Wifi	4G	2024-01-03	Yes	Mobile	1	No	Yes	0	Always	No	Yes	No	No	UAE	Geology	F	10	90	30	21	No	Under-7	M	BB	Moderate	Yes	Yes	54	24.8105	34.2452	594.348	78.1516	867.532
Male	20	Non Government	No	Yes	Mid	Wifi	4G	2024-01-03	No	Mobile	1	No	No	0	Always	Yes	Yes	Yes	Yes	UAE	Geology	S	25	80	29	23	No	Under-7	M	BB	Moderate	Yes	Yes	74	26.2736	49.7113	101.2	79.7491	763.592
Male	23	Government	No	No	Poor	Mobile Data	4G	0	No	Mobile	0.75	No	Yes	0	Sometimes	No	Yes	Yes	Yes	LEB	Biology	F	10	8	9	3	No	Above-7	L	AA	Low	Yes	Yes	68	27.607	36.4285	391.465	87.0843	523.462
Female	20	Non Government	No	No	Mid	Mobile Data	4G	2024-01-03	No	Mobile	0.5	Yes	Yes	0	Never	No	No	Yes	Yes	OM	Environmental Science	S	15	7	12	7	No	Above-7	L	BA	Moderate	Yes	Yes	63	20.4018	69.1306	297.941	39.068	554.465
Male	24	Non Government	Yes	Yes	Mid	Wifi	4G	2024-03-06	Yes	Computer	0.5	Yes	Yes	0	Sometimes	No	No	Yes	No	UAE	English	F	70	90	20	21	No	Under-7	M	Fail	Moderate	No	No	74	20.0098	36.3408	974.097	59.8636	890.081
Male	24	Non Government	Yes	Yes	Mid	Wifi	3G	2024-03-06	Yes	Computer	1	No	Yes	0	Always	Yes	No	No	Yes	KW	Engineering	S	75	80	15	20	No	Under-7	M	BA	Moderate	Yes	Yes	77	19.2548	49.4987	754.518	64.834	525.451
Male	18	Non Government	Yes	Yes	Poor	Mobile Data	3G	2024-01-03	Yes	Mobile	0.75	Yes	Yes	12	Sometimes	No	No	Yes	Yes	KW	Environmental Science	F	78	98	10	11	No	Under-7	M	Fail	Low	No	No	53	25.6372	44.5648	414.688	49.7565	600.495
Male	24	Non Government	No	Yes	Poor	Mobile Data	4G	2024-01-03	No	Mobile	0.75	Yes	No	2	Sometimes	No	No	Yes	Yes	UAE	Engineering	S	79	89	11	14	No	Under-7	M	Fail	Moderate	No	No	54	26.4777	55.5755	183.561	80.3642	798.615
Male	19	Non Government	Yes	Yes	Mid	Wifi	4G	2024-01-03	No	Computer	0.5	Yes	Yes	0	Always	No	Yes	No	Yes	LEB	Neuroscience	F	16	90	15	11	No	Under-7	M	CC	Moderate	Yes	Yes	65	18.379	35.1615	565.121	75.7452	736.667
Male	21	Non Government	No	Yes	Mid	Mobile Data	4G	2024-01-03	No	Mobile	0.75	No	No	0	Never	No	Yes	Yes	No	KW	Chemistry	S	17	80	13	10	No	Under-7	M	CC	Moderate	Yes	Yes	72	29.2345	47.2127	292.103	73.253	676.522
Male	24	Government	No	No	Poor	Mobile Data	2G	2024-01-03	No	Mobile	0.75	No	No	0	Always	Yes	No	No	No	JO	Neuroscience	F	40	87	50	41	No	Under-7	M	AA	Low	Yes	Yes	74	18.6237	40.9882	582.787	89.829	939.845
Male	21	Non Government	Yes	Yes	Mid	Wifi	4G	2024-01-03	Yes	Mobile	0.75	Yes	Yes	12	Sometimes	No	Yes	No	Yes	LEB	Computer Science	S	35	92	29	33	No	Under-7	M	CB	Moderate	Yes	Yes	58	24.4956	65.5101	851.826	45.5629	531.826
Male	21	Government	No	Yes	Mid	Wifi	4G	2024-01-03	No	Mobile	1	No	No	12	Always	Yes	No	Yes	No	LEB	Statistics	F	14	97	15	14	No	Under-7	H	BB	Low	Yes	Yes	74	26.5087	31.6234	654.213	74.1274	844.852
Male	19	Non Government	No	Yes	Mid	Wifi	4G	0	No	Mobile	0.75	No	No	0	Sometimes	No	Yes	Yes	Yes	OM	Computer Science	F	13	82	20	30	No	Under-7	H	DC	Low	Yes	Yes	58	28.4516	66.5491	670.41	63.0843	495.438
Male	24	Non Government	No	Yes	Mid	Wifi	4G	2024-01-03	No	Computer	0.75	No	No	2	Always	No	No	Yes	Yes	UAE	Neuroscience	S	24	97	15	14	No	Under-7	H	DD	Moderate	Yes	Yes	75	26.569	63.3198	586.927	48.7794	769.44
Male	18	Non Government	No	No	Mid	Mobile Data	3G	0	No	Mobile	0.5	No	No	0	Always	No	No	Yes	Yes	OM	Environmental Science	S	23	82	20	30	No	Under-7	H	DD	Low	Yes	Yes	60	27.6207	41.9028	934.539	39.6352	922.374
Male	19	Non Government	Yes	Yes	Mid	Mobile Data	4G	2024-01-03	No	Mobile	0.75	No	No	12	Always	No	Yes	Yes	No	UAE	Biology	F	20	3	9	3	No	Above-7	L	DD	Moderate	Yes	Yes	65	22.0734	61.5716	938.712	83.753	674.741
Female	20	Non Government	No	Yes	Poor	Wifi	4G	2024-01-03	No	Mobile	0.5	No	No	0	Sometimes	No	Yes	No	Yes	OM	Mathematics	S	15	4	12	7	No	Above-7	L	BB	Moderate	Yes	Yes	55	27.7779	31.2485	561.451	65.7273	834.577
Male	18	Government	No	Yes	Mid	Wifi	4G	2024-01-03	No	Computer	0.75	Yes	Yes	0	Always	Yes	No	No	No	LEB	Mathematics	F	5	13	6	6	No	Above-7	L	DD	Moderate	Yes	Yes	58	18.9614	68.6746	375.184	79.496	892.236
Male	21	Non Government	No	Yes	Mid	Mobile Data	3G	2024-01-03	No	Mobile	0.75	No	Yes	0	Always	No	No	No	Yes	JO	Engineering	S	7	9	11	10	No	Above-7	L	DD	Moderate	Yes	Yes	78	28.7378	51.0638	513.628	62.7207	481.616
Female	23	Non Government	No	Yes	Mid	Wifi	4G	2024-01-03	No	Computer	0.75	Yes	Yes	0	Always	No	Yes	Yes	No	LEB	Physics	F	10	94	40	11	Yes	Under-7	M	DC	Moderate	Yes	Yes	72	24.5711	42.1312	267.902	43.1986	823.496
Female	20	Non Government	No	Yes	Mid	Wifi	4G	2024-03-06	No	Tab	1	No	Yes	2	Sometimes	Yes	Yes	No	Yes	JO	Statistics	S	25	89	21	13	Yes	Under-7	M	DC	Moderate	Yes	Yes	74	27.8076	44.5033	672.71	50.2529	951.905
Male	21	Non Government	No	Yes	Mid	Wifi	3G	2024-01-03	Yes	Mobile	0.5	No	Yes	0	Sometimes	No	Yes	No	Yes	OM	Statistics	F	30	98	42	21	Yes	Under-7	H	DD	High	Yes	Yes	48	23.4278	32.6562	550.083	52.8923	745.822
Male	23	Government	No	Yes	Mid	Mobile Data	4G	0	No	Mobile	0.5	No	No	2	Never	No	Yes	No	Yes	UAE	Physics	S	35	97	41	23	Yes	Under-7	H	BA	Low	Yes	Yes	64	25.7229	69.574	192.97	88.3761	511.673
Female	19	Non Government	No	Yes	Mid	Wifi	4G	2024-01-03	No	Mobile	1	No	Yes	0	Always	No	No	Yes	Yes	KW	Physics	F	32	88	32	25	Yes	Under-7	M	BA	Low	Yes	Yes	62	24.3168	31.5717	277.883	30.338	476.166
Female	21	Government	No	No	Mid	Mobile Data	3G	0	No	Mobile	0.5	Yes	No	0	3	No	Yes	Yes	Yes	LEB	Neuroscience	S	25	87	21	27	Yes	Under-7	M	BA	Low	Yes	Yes	71	26.7791	56.1963	531.669	89.14	555.841
Female	20	Non Government	Yes	Yes	Poor	Mobile Data	3G	2024-01-03	Yes	Mobile	0.5	No	No	0	Never	No	Yes	No	Yes	OM	Statistics	F	72	98	52	15	Yes	Under-7	H	AA	Moderate	Yes	Yes	56	18.9796	47.7094	898.83	88.8277	462.108
Female	18	Non Government	No	Yes	Mid	Wifi	4G	2024-03-06	No	Mobile	1	Yes	Yes	8	Always	Yes	Yes	Yes	Yes	OM	Engineering	S	75	90	51	17	Yes	Under-7	H	BA	Moderate	Yes	Yes	67	18.7242	67.9566	609.752	89.769	708.036
Female	22	Non Government	No	Yes	Mid	Wifi	4G	2024-03-06	Yes	Computer	1	Yes	No	0	Always	Yes	Yes	Yes	Yes	OM	Environmental Science	F	20	88	31	28	Yes	Above-7	M	AA	Moderate	Yes	Yes	73	20.9652	39.84	713.382	58.5953	441.823
Female	24	Government	Yes	Yes	Mid	Wifi	4G	0	No	Computer	1	No	No	0	Always	Yes	Yes	Yes	No	JO	Chemistry	S	10	98	41	38	Yes	Above-7	M	AA	Low	Yes	Yes	66	19.9145	51.2835	405.126	87.8285	534.043
Female	21	Non Government	Yes	Yes	Mid	Wifi	4G	2024-03-06	Yes	Computer	0.5	No	Yes	0	Always	No	Yes	No	Yes	UAE	Neuroscience	F	90	98	41	38	Yes	Under-7	H	AA	Low	Yes	Yes	52	28.4614	49.2942	614.27	53.736	663.946
Male	20	Government	No	No	Poor	Mobile Data	3G	2024-01-03	No	Mobile	1	No	Yes	0	Never	No	Yes	No	No	LEB	Geology	S	80	88	51	39	Yes	Under-7	H	AA	Moderate	Yes	Yes	90	20.6306	58.1147	502.642	31.5777	684.349
Female	23	Non Government	Yes	No	Mid	Mobile Data	3G	2024-01-03	Yes	Mobile	0.75	No	Yes	0	Always	No	No	Yes	Yes	JO	Mathematics	F	80	95	21	28	Yes	Under-7	H	BA	Moderate	Yes	Yes	82	29.7104	32.7204	693.217	43.4608	739.239
Female	24	Non Government	No	Yes	Mid	Wifi	4G	2024-03-06	No	Computer	0.5	Yes	Yes	2	Sometimes	No	No	Yes	Yes	SA	Geology	S	78	70	31	29	Yes	Under-7	H	AA	Moderate	Yes	Yes	60	22.0427	37.7516	145.518	86.7178	823.369
Female	23	Non Government	No	Yes	Mid	Wifi	4G	2024-01-03	No	Mobile	0.5	Yes	Yes	0	Sometimes	Yes	Yes	Yes	No	LEB	Biology	F	10	18	71	38	Yes	Above-7	M	Fail	Low	No	No	72	20.1854	38.5826	543.97	30.8259	428.337
Male	24	Non Government	No	Yes	Mid	Mobile Data	4G	2024-01-03	No	Mobile	1	No	Yes	0	Always	Yes	No	Yes	Yes	OM	Mathematics	S	10	58	51	48	Yes	Above-7	M	BA	Moderate	Yes	Yes	61	27.4764	59.526	366.393	62.7596	448.373
Female	21	Non Government	No	Yes	Mid	Mobile Data	3G	2024-01-03	No	Mobile	0.5	No	No	12	Always	Yes	No	No	No	KW	Biology	F	98	88	60	31	No	Under-7	H	AA	Moderate	Yes	Yes	58	25.9045	37.5655	393.567	34.5361	436.515
Female	23	Non Government	Yes	Yes	Mid	Wifi	4G	2024-01-03	Yes	Computer	0.75	Yes	Yes	0	Always	No	No	Yes	Yes	JO	Statistics	S	75	81	51	34	No	Under-7	H	BB	Moderate	Yes	Yes	58	23.9783	52.9397	964.826	47.1838	653.89
Female	19	Non Government	No	Yes	Poor	Mobile Data	3G	2024-01-03	No	Mobile	1	Yes	Yes	0	Always	No	Yes	Yes	No	JO	Mathematics	F	10	17	50	21	No	Under-7	M	BA	Low	Yes	Yes	53	24.6644	38.6098	264.425	35.2856	425.109
Female	24	Government	No	Yes	Mid	Mobile Data	4G	2024-01-03	No	Mobile	0.75	Yes	Yes	12	Sometimes	No	Yes	6	Yes	JO	Materials Science	S	35	2	29	23	No	Under-7	M	BB	Low	Yes	Yes	95	26.6304	64.465	380.121	81.5717	847.649
Female	22	Government	No	Yes	Mid	Wifi	4G	2024-03-06	No	Mobile	0.75	No	No	0	Never	No	No	No	Yes	JO	Engineering	F	10	20	22	97	No	Above-7	L	AA	Moderate	Yes	Yes	85	20.7415	67.6874	558.903	65.4642	533.8
Female	18	Government	No	Yes	Mid	Wifi	4G	2024-01-03	No	Mobile	0.75	No	Yes	0	Never	No	No	No	Yes	JO	Materials Science	S	5	9	19	98	No	Above-7	L	Fail	Low	No	No	69	29.956	50.7397	876.724	84.1264	963.527
Female	24	Non Government	Yes	Yes	Rich	Wifi	4G	2024-01-03	Yes	Computer	0.5	Yes	Yes	0	Always	Yes	Yes	Yes	No	OM	Physics	F	10	10	40	51	No	Above-7	L	BB	High	Yes	Yes	73	29.6975	44.0924	475.003	71.3012	691.842
Female	21	Non Government	Yes	Yes	Mid	Wifi	3G	2024-03-06	Yes	Mobile	0.5	Yes	Yes	0	Always	Yes	Yes	No	No	LEB	Materials Science	S	35	2	29	23	No	Above-7	L	AA	Moderate	Yes	Yes	56	25.8039	39.3623	769.479	88.2617	667.795
Female	22	Government	Yes	No	Mid	Mobile Data	3G	2024-01-03	No	Mobile	1	No	Yes	0	Sometimes	No	Yes	Yes	Yes	KW	Neuroscience	F	20	90	50	61	Yes	Above-7	M	CB	Low	Yes	Yes	75	20.3945	31.9912	870.737	60.5927	868.323
Female	21	Non Government	Yes	No	Mid	Mobile Data	3G	2024-03-06	Yes	Mobile	1	No	Yes	0	Always	No	Yes	No	No	LEB	Computer Science	S	32	82	59	63	Yes	Above-7	M	BB	High	Yes	Yes	67	26.1627	40.74	379.015	68.3226	827.892
Female	23	Government	No	Yes	Poor	Mobile Data	4G	2024-01-03	No	Mobile	1	No	No	0	Always	Yes	Yes	Yes	Yes	JO	Biology	F	10	30	50	91	Yes	Above-7	L	BB	Low	Yes	Yes	72	18.8664	56.1694	453.475	64.5785	764.385
Female	22	Non Government	Yes	Yes	Mid	Mobile Data	3G	2024-03-06	Yes	Mobile	0.75	No	Yes	0	Sometimes	No	Yes	Yes	Yes	UAE	Astronomy	S	12	22	59	83	Yes	Above-7	L	AA	Moderate	Yes	Yes	54	18.3678	51.3447	420.901	59.0556	961.088
Female	21	Government	Yes	Yes	Mid	Wifi	4G	2024-03-06	No	Computer	0.5	Yes	Yes	0	Never	No	No	Yes	Yes	LEB	Biology	F	11	20	20	98	No	Above-7	L	BA	Low	Yes	Yes	62	21.0922	67.7617	849.57	80.7576	653.356
Female	22	Non Government	No	Yes	Poor	Mobile Data	3G	0	No	Mobile	0.5	Yes	Yes	0	Sometimes	No	No	Yes	No	LEB	Physics	S	10	12	29	93	No	Above-7	L	Fail	Low	No	No	68	23.5515	45.8511	139.912	68.6715	885.119
Female	19	Non Government	No	Yes	Mid	Mobile Data	4G	2024-01-03	No	Mobile	1	No	Yes	0	Always	Yes	No	No	Yes	UAE	Engineering	F	69	82	20	28	Yes	Under-7	H	BA	Moderate	Yes	Yes	63	28.4193	57.7545	377.579	78.0787	628.056
Female	21	Non Government	No	Yes	Poor	Mobile Data	4G	2024-01-03	No	Mobile	0.75	Yes	Yes	12	Sometimes	No	No	Yes	Yes	KW	Neuroscience	S	70	83	29	33	Yes	Under-7	H	Fail	Moderate	No	No	65	26.726	49.5729	711.468	77.1818	903.007
Female	22	Non Government	No	Yes	Mid	Mobile Data	4G	2024-01-03	No	Mobile	0.75	Yes	No	2	Sometimes	No	No	Yes	Yes	OM	Mathematics	F	89	92	40	28	Yes	Under-7	H	Fail	Moderate	No	No	74	26.9125	50.503	608.899	41.4627	555.685
Female	18	Non Government	No	Yes	Poor	Mobile Data	3G	2024-01-03	No	Mobile	0.5	Yes	Yes	0	Always	No	Yes	No	Yes	KW	Environmental Science	S	79	93	49	23	Yes	Under-7	H	CC	Low	Yes	Yes	78	23.1059	40.711	492.66	69.0098	573.56
Female	22	Non Government	Yes	Yes	Mid	Mobile Data	3G	2024-03-06	Yes	Mobile	0.75	No	No	0	Never	No	Yes	Yes	No	LEB	Environmental Science	F	15	90	21	97	Yes	Under-7	M	CC	Moderate	Yes	Yes	65	22.1512	48.198	585.953	41.9789	806.722
Female	20	Non Government	Yes	Yes	Mid	Mobile Data	3G	2024-01-03	No	Mobile	0.75	No	No	0	Always	Yes	No	No	No	LEB	Biology	S	20	77	31	88	Yes	Under-7	M	AA	Moderate	Yes	Yes	72	22.4525	48.8314	277.826	64.9992	527.628
Female	20	Non Government	No	No	Mid	Mobile Data	3G	2024-01-03	No	Mobile	0.75	Yes	Yes	12	Sometimes	No	Yes	No	Yes	KW	Materials Science	F	4	10	11	7	No	Above-7	L	CB	Moderate	Yes	Yes	78	29.8518	58.2657	487.645	70.6461	537.493
Female	18	Government	No	No	Poor	Mobile Data	3G	2024-01-03	No	Mobile	1	No	No	12	Always	Yes	No	Yes	No	JO	Mathematics	S	5	0	1	8	No	Above-7	L	BB	Low	Yes	Yes	62	18.4813	67.6256	551.533	89.8341	583.157
Male	22	Non Government	No	Yes	Mid	Wifi	4G	2024-03-06	No	Computer	Other	0.5	Yes	Private	0	Always	Yes	Yes	No	UAE	Physics	F	88	81	50	10	Yes	Above-7	M	AA	Moderate	Yes	Yes	55	28.4044	43.1729	911.07	31.8325	807.357
Male	18	Non Government	Yes	Yes	Poor	Wifi	3G	2024-03-06	No	Computer	Other	0.5	Yes	Private	0	Always	Yes	No	Yes	LEB	Environmental Science	S	90	88	54	12	Yes	Above-7	M	AA	Moderate	Yes	Yes	83	24.9441	31.688	334.752	35.4745	933.633
Male	22	Non Government	No	Yes	Mid	Wifi	4G	0	No	Mobile	State	0.5	No	Private	2	Never	No	No	No	OM	Geology	F	86	98	50	20	Yes	Under-7	H	AA	Low	Yes	Yes	80	23.2634	49.8518	881.046	34.6216	804.741
Male	23	Non Government	No	Yes	Poor	Wifi	4G	2024-03-06	No	Mobile	Private	0.5	Yes	Bus	2	Always	No	Yes	No	KW	Physics	S	90	90	57	22	Yes	Under-7	H	AA	Low	Yes	Yes	70	26.7031	51.7785	679.817	53.9017	896.689
Male	24	Government	No	No	Mid	Mobile Data	2G	2024-01-03	No	Mobile	Private	0.5	No	Bus	12	Always	Yes	No	Yes	JO	English	F	78	91	50	40	Yes	Under-7	H	AA	Low	Yes	Yes	55	23.84	36.7376	118.307	79.2953	726.136
Female	18	Non Government	No	Yes	Poor	Mobile Data	4G	2024-01-03	No	Mobile	State	0.5	No	Private	2	Always	Yes	No	Yes	JO	Mathematics	S	70	98	54	72	Yes	Under-7	H	BA	Moderate	Yes	Yes	58	28.4811	60.4186	752.168	80.6434	441.354
Male	18	Government	No	No	Mid	Wifi	4G	2024-01-03	No	Mobile	State	0.75	No	Private	0	Always	No	Yes	Yes	KW	Materials Science	F	80	80	46	61	Yes	Under-7	M	CC	Low	Yes	Yes	55	28.8084	69.3972	131.997	74.2188	460.28
Male	23	Non Government	No	Yes	Rich	Mobile Data	4G	2024-01-03	No	Mobile	State	0.5	Yes	Bus	2	Sometimes	No	Yes	Yes	LEB	English	S	85	82	59	63	Yes	Under-7	M	BA	High	Yes	Yes	63	23.0607	67.831	997.643	83.8127	732.635
Female	19	Non Government	No	Yes	Rich	Wifi	4G	2024-01-03	No	Mobile	Other	0.5	No	Bus	0	Always	No	No	No	UAE	Chemistry	F	88	90	86	81	Yes	Under-7	H	CC	Moderate	Yes	Yes	70	21.3219	37.8842	885.373	49.3716	596.681
Female	23	Non Government	Yes	Yes	Mid	Wifi	4G	2024-03-06	No	Computer	State	0.5	No	Bus	12	Never	No	Yes	No	UAE	Mathematics	S	89	92	89	83	Yes	Under-7	H	Fail	Low	No	No	75	25.1082	65.0145	367.609	35.2893	532.341
Male	19	Government	Yes	Yes	Mid	Mobile Data	3G	2024-01-03	No	Computer	Private	0.5	No	Private	12	Sometimes	No	No	No	OM	Environmental Science	F	39	71	40	26	No	Above-7	M	BA	Low	Yes	Yes	62	28.9484	58.1797	331.67	33.4892	679.754
Male	20	Non Government	No	Yes	Poor	Mobile Data	4G	2024-01-03	No	Mobile	Private	0.75	Yes	Private	8	Sometimes	No	Yes	No	LEB	Statistics	S	35	80	34	22	No	Above-7	M	Fail	Low	No	No	63	20.5279	48.1539	443.297	81.128	799.898
Male	21	Government	Yes	Yes	Rich	Wifi	4G	2024-01-03	No	Computer	Private	0.75	No	Private	0	Always	Yes	No	No	KW	Physics	F	76	81	80	86	No	Under-7	H	Fail	High	No	No	61	25.4756	51.6244	420.55	73.8262	630.995
Male	21	Non Government	No	Yes	Mid	Mobile Data	4G	2024-01-03	No	Mobile	State	1	No	Private	0	Always	Yes	No	No	UAE	Statistics	S	65	89	64	82	No	Under-7	H	AA	Moderate	Yes	Yes	63	25.5787	63.984	435.104	71.9169	881.525
Female	24	Non Government	Yes	Yes	Mid	Mobile Data	3G	2024-01-03	Yes	Computer	State	0.75	Yes	Private	12	Never	No	No	Yes	JO	Materials Science	F	96	95	70	70	Yes	Under-7	H	BA	Moderate	Yes	Yes	66	26.7974	49.2054	386.449	50.3806	843.114
Female	24	Non Government	Yes	Yes	Mid	Wifi	3G	2024-01-03	Yes	Mobile	State	0.5	No	Private	0	Always	No	Yes	No	UAE	Materials Science	S	80	91	87	72	Yes	Under-7	H	BA	Low	Yes	Yes	65	19.5788	44.9283	659.02	52.7943	840.949
Male	20	Non Government	Yes	No	Mid	Mobile Data	3G	2024-03-06	Yes	Mobile	State	1	No	Private	0	Always	Yes	No	No	OM	Astronomy	F	2	9	10	1	No	Above-7	L	AA	High	Yes	Yes	77	26.5899	49.7299	247.837	87.4868	991.114
Male	21	Government	No	No	Poor	Mobile Data	4G	2024-01-03	No	Mobile	State	0.5	No	Private	0	Always	Yes	No	No	JO	Statistics	S	3	8	19	3	No	Above-7	L	BA	Moderate	Yes	Yes	79	28.9084	53.1652	861.383	33.8283	577.138
Female	19	Government	No	No	Mid	Mobile Data	3G	0	No	Mobile	State	0.75	No	Private	12	Always	Yes	No	No	OM	Geology	F	50	79	10	31	No	Under-7	M	BA	Low	Yes	Yes	63	20.1562	37.5631	831.162	76.4239	786.835
Male	18	Government	No	No	Poor	Mobile Data	4G	0	No	Mobile	Private	0.5	No	Bus	2	Sometimes	No	No	Yes	OM	Biology	S	53	88	9	33	No	Under-7	M	BB	Low	Yes	Yes	54	20.8505	66.0363	528.835	48.578	913.287
Female	19	Non Government	No	Yes	Mid	Mobile Data	4G	2024-01-03	No	Mobile	State	1	Yes	Bus	0	Never	No	No	Yes	SA	Astronomy	F	70	89	12	21	No	Under-7	H	AA	Moderate	Yes	Yes	62	29.6567	56.9675	867.457	32.3433	747.715
Female	21	Government	No	No	Poor	Mobile Data	3G	2024-01-03	Yes	Mobile	State	1	No	Bus	0	Never	No	No	No	JO	Astronomy	S	59	90	19	43	No	Under-7	H	AA	Low	Yes	Yes	60	20.1717	55.3308	322.431	74.5542	873.701
Male	23	Government	No	No	Mid	Mobile Data	4G	2024-01-03	No	Mobile	State	0.5	Yes	Bus	0	Always	Yes	Yes	Yes	LEB	Chemistry	F	78	80	66	51	Yes	Under-7	M	BB	High	Yes	Yes	48	28.2526	33.9798	115.809	49.8547	648.671
Male	23	Non Government	No	Yes	Mid	Mobile Data	4G	2024-01-03	No	Mobile	State	0.25	Yes	Private	12	Always	Yes	Yes	No	SA	Materials Science	S	79	72	79	83	Yes	Under-7	M	AA	Moderate	Yes	Yes	60	23.9073	54.167	657.287	73.3289	754.295
Male	18	Government	Yes	Yes	Mid	Mobile Data	4G	2024-01-03	Yes	Mobile	State	0.5	No	Private	2	Always	Yes	No	Yes	KW	Engineering	F	10	9	2	1	No	Above-7	L	BA	Low	Yes	Yes	68	20.9668	34.8384	512.118	72.4593	433.4
Male	20	Non Government	Yes	Yes	Mid	Wifi	3G	2024-01-03	Yes	Computer	State	0.5	No	Bus	0	Always	No	Yes	No	JO	English	S	9	7	9	3	No	Above-7	L	BB	Moderate	Yes	Yes	72	28.449	33.1479	610.448	62.0872	991.461
Male	18	Government	No	Yes	Mid	Wifi	4G	2024-01-03	No	Mobile	State	0.5	No	Bus	0	Always	Yes	Yes	No	OM	Mathematics	F	98	90	86	71	Yes	Under-7	H	AA	Low	Yes	Yes	80	23.3437	51.0924	909.405	76.6424	880.011
Male	18	Non Government	No	Yes	Mid	Wifi	4G	2024-01-03	No	Mobile	Private	0.5	Yes	Private	0	Always	Yes	Yes	Yes	JO	Statistics	S	89	92	89	83	Yes	Under-7	H	AA	Low	Yes	Yes	70	24.1778	46.1114	972.933	64.8623	921.285
Male	23	Non Government	Yes	Yes	Rich	Wifi	4G	2024-01-03	Yes	Computer	State	0.5	No	Bus	0	Never	No	No	No	OM	Environmental Science	F	88	90	76	81	Yes	Under-7	H	BB	High	Yes	Yes	80	22.3108	53.5524	671.008	47.1982	816.577
Female	18	Government	No	Yes	Mid	Mobile Data	4G	2024-01-03	No	Mobile	Other	0.75	No	Private	0	Never	No	No	Yes	UAE	Chemistry	S	99	96	89	84	Yes	Under-7	H	CC	Moderate	Yes	Yes	78	25.1154	33.5689	787.65	74.0469	511.63
Female	22	Non Government	Yes	Yes	Mid	Wifi	4G	2024-03-06	No	Computer	State	1	Yes	Bus	0	Always	No	Yes	Yes	SA	Geology	F	82	89	22	31	Yes	Under-7	H	CC	Low	Yes	Yes	64	19.9623	47.2393	175.428	65.3484	418.617
Male	22	Non Government	No	Yes	Poor	Wifi	3G	2024-01-03	No	Mobile	State	0.5	Yes	Private	0	Always	No	Yes	No	JO	Environmental Science	S	84	92	29	43	Yes	Under-7	H	BB	Moderate	Yes	Yes	68	22.693	36.9915	244.644	30.7636	918.794
Female	19	Government	Yes	Yes	Mid	Mobile Data	4G	2024-01-03	Yes	Mobile	State	0.5	No	Private	2	Always	Yes	No	No	SA	Astronomy	F	70	69	46	45	Yes	Above-7	M	AA	Low	Yes	Yes	78	29.6329	69.484	759.884	84.0987	637.798
Male	22	Non Government	Yes	Yes	Mid	Mobile Data	3G	2024-01-03	No	Mobile	State	0.5	Yes	Bus	0	Always	Yes	Yes	No	SA	Geology	S	74	62	49	43	Yes	Above-7	M	BA	Low	Yes	Yes	98	21.0976	52.446	488.229	62.7386	558.319
Male	18	Non Government	No	Yes	Poor	Mobile Data	3G	0	No	Mobile	Private	0.5	No	Bus	2	Always	Yes	No	Yes	UAE	Geology	F	90	79	76	79	Yes	Under-7	H	BA	Low	Yes	Yes	53	25.8808	57.4975	501.369	82.1176	737.004
Male	24	Government	No	Yes	Mid	Wifi	4G	2024-01-03	No	Computer	Private	0.75	No	Private	12	Always	Yes	Yes	No	SA	Environmental Science	S	84	77	79	68	Yes	Under-7	H	AA	Moderate	Yes	Yes	62	21.9023	43.0167	377.747	82.9642	652.539
Male	20	Non Government	No	Yes	Mid	Wifi	4G	2024-01-03	No	Mobile	Other	0.75	Yes	Bus	12	Always	Yes	Yes	Yes	LEB	Mathematics	F	80	80	62	11	Yes	Above-7	M	BA	Low	Yes	Yes	58	27.2817	33.7896	646.621	56.698	791
Female	24	Non Government	No	Yes	Mid	Wifi	4G	2024-01-03	No	Mobile	State	0.5	Yes	Bus	2	Sometimes	No	No	Yes	JO	English	S	81	82	69	13	Yes	Above-7	M	AA	Moderate	Yes	Yes	59	19.5705	69.0348	266.649	60.4596	690.276
Male	19	Non Government	No	Yes	Rich	Wifi	4G	2024-03-06	No	Computer	State	1	No	Private	0	Always	Yes	No	Yes	KW	Engineering	F	10	0	2	41	No	Above-7	L	BA	Moderate	Yes	Yes	57	29.6379	41.4504	664.225	54.9453	818.34
Female	19	Non Government	No	Yes	Mid	Wifi	4G	2024-01-03	No	Mobile	State	0.5	No	Bus	0	Always	No	Yes	Yes	JO	Biology	S	11	2	9	49	No	Above-7	L	AA	Low	Yes	Yes	62	23.4455	46.9523	256.419	56.9662	912.054
Female	20	Non Government	No	Yes	Poor	Mobile Data	3G	2024-01-03	No	Mobile	Private	0.5	No	Private	2	Always	Yes	No	Yes	LEB	Mathematics	F	85	89	22	61	No	Under-7	H	AA	Low	Yes	Yes	84	20.8326	55.9946	157.443	83.7088	517.334
Male	21	Non Government	Yes	Yes	Mid	Mobile Data	3G	2024-01-03	No	Mobile	State	0.5	Yes	Private	2	Always	No	Yes	No	KW	Mathematics	S	80	89	23	68	No	Under-7	H	AA	Moderate	Yes	Yes	68	18.882	30.9879	397.322	77.2886	597.66
Male	18	Government	No	Yes	Mid	Mobile Data	4G	2024-01-03	No	Mobile	State	0.5	No	Private	0	Never	No	Yes	No	JO	Environmental Science	F	95	87	62	81	No	Under-7	M	AA	Low	Yes	Yes	65	20.0371	62.4104	308.026	37.5915	662.089
Female	24	Non Government	No	Yes	Mid	Mobile Data	4G	2024-01-03	No	Mobile	State	0.5	No	Bus	0	Always	Yes	No	Yes	KW	Statistics	S	87	79	73	98	No	Under-7	M	CB	Moderate	Yes	Yes	52	24.2373	51.4631	900.092	66.6185	977.235
Female	20	Non Government	No	Yes	Mid	Wifi	4G	2024-03-06	No	Tab	Other	0.5	No	Bus	0	Always	Yes	Yes	Yes	KW	Chemistry	F	85	87	72	10	Yes	Above-7	M	AA	Moderate	Yes	Yes	61	22.044	41.1287	149.458	89.7544	619.2
Male	18	Non Government	No	Yes	Poor	Wifi	4G	2024-01-03	No	Mobile	State	0.5	No	Bus	8	Always	Yes	No	Yes	LEB	Geology	S	79	88	79	20	Yes	Above-7	M	BB	Low	Yes	Yes	65	27.9466	32.4643	258.952	65.733	628.66
Male	18	Non Government	Yes	Yes	Mid	Mobile Data	3G	2024-03-06	Yes	Mobile	State	0.5	No	Bus	0	Always	Yes	Yes	No	OM	Materials Science	F	80	81	71	30	Yes	Under-7	M	CC	Moderate	Yes	Yes	66	23.1707	36.4999	593.848	77.1523	792.084
Female	19	Non Government	Yes	Yes	Mid	Mobile Data	3G	2024-03-06	Yes	Mobile	State	0.5	No	Bus	0	Always	No	Yes	Yes	OM	Statistics	S	70	83	70	23	Yes	Under-7	M	BB	Moderate	Yes	Yes	70	20.9846	65.8014	532.96	76.1437	651.52
Female	20	Government	No	No	Poor	Mobile Data	3G	0	No	Mobile	State	0.5	No	Bus	0	Always	No	No	Yes	KW	Statistics	F	80	82	76	19	Yes	Under-7	M	AA	Low	Yes	Yes	74	25.4057	57.441	141.267	51.0191	970.734
Female	19	Government	No	No	Mid	Mobile Data	4G	0	No	Mobile	Private	0.75	No	Private	2	Never	Yes	No	Yes	JO	Mathematics	S	70	82	75	29	Yes	Under-7	M	BA	Low	Yes	Yes	80	26.4813	39.9961	106.527	52.311	936.681
Female	19	Non Government	Yes	Yes	Mid	Wifi	3G	2024-01-03	Yes	Mobile	State	0.5	No	Bus	2	Sometimes	Yes	Yes	Yes	SA	Statistics	F	89	87	86	15	Yes	Under-7	M	AA	Low	Yes	Yes	70	20.0045	32.624	989.261	73.4446	708.045
Male	20	Government	No	Yes	Poor	Mobile Data	4G	2024-01-03	No	Mobile	Other	0.5	Yes	Private	0	Always	Yes	Yes	No	LEB	Physics	S	90	86	85	10	Yes	Under-7	M	CB	Low	Yes	Yes	65	20.0114	57.6246	692.951	59.999	786.865
Female	21	Non Government	Yes	Yes	Poor	Mobile Data	4G	2024-01-03	No	Mobile	State	0.5	Yes	Private	2	Always	Yes	Yes	Yes	JO	Biology	F	69	77	76	75	Yes	Above-7	M	AA	Moderate	Yes	Yes	62	18.4401	52.8963	428.866	64.2342	434.818
Female	18	Non Government	No	Yes	Mid	Mobile Data	3G	2024-01-03	No	Mobile	State	0.5	No	Private	2	Always	Yes	Yes	Yes	OM	Computer Science	S	70	76	65	70	Yes	Above-7	M	CC	Moderate	Yes	Yes	62	26.8368	46.1808	523.389	72.7743	817.438
Male	19	Government	No	Yes	Mid	Wifi	3G	2024-01-03	No	Mobile	State	0.5	No	Private	12	Never	No	Yes	No	JO	Physics	F	75	72	64	39	Yes	Above-7	L	BB	Low	Yes	Yes	72	25.9657	44.5445	339.895	76.6545	824.321
Male	19	Government	No	Yes	Mid	Mobile Data	4G	0	No	Mobile	State	0.5	Yes	Bus	8	Always	No	Yes	Yes	JO	Statistics	S	72	76	66	40	Yes	Above-7	L	BB	Low	Yes	Yes	106	23.6956	38.6726	410.386	46.291	615.52
Male	18	Non Government	No	Yes	Poor	Mobile Data	3G	2024-01-03	No	Mobile	State	0.5	No	Private	0	Always	Yes	Yes	Yes	UAE	Physics	F	77	82	74	79	Yes	Under-7	M	CC	Low	Yes	Yes	67	28.13	56.7845	684.14	38.8076	531.81
Male	20	Non Government	No	Yes	Poor	Mobile Data	3G	2024-01-03	No	Mobile	State	0.5	Yes	Private	0	Always	Yes	Yes	No	LEB	Neuroscience	S	71	84	67	80	Yes	Under-7	M	CB	Low	Yes	Yes	62	27.668	68.8267	894.531	47.5077	949.047
Male	20	Non Government	Yes	Yes	Mid	Wifi	4G	2024-01-03	Yes	Mobile	State	0.5	No	Bus	12	Always	Yes	Yes	Yes	KW	Environmental Science	F	87	92	74	89	Yes	Under-7	H	BB	Moderate	Yes	Yes	56	25.0243	37.0286	265.717	60.4523	656.023
Female	24	Non Government	No	Yes	Poor	Mobile Data	3G	2024-01-03	No	Mobile	State	0.5	No	Bus	0	Always	Yes	Yes	No	SA	Engineering	S	81	84	77	85	Yes	Under-7	H	CC	Low	Yes	Yes	60	28.4193	53.8847	856.325	50.5285	792.224
Female	22	Government	No	Yes	Mid	Wifi	4G	2024-01-03	No	Mobile	State	0.5	No	Private	12	Sometimes	Yes	6	Yes	OM	Neuroscience	F	15	97	22	10	Yes	Under-7	H	BA	High	Yes	Yes	75	20.4701	46.9674	209.401	64.1018	419.997
Male	23	Non Government	Yes	Yes	Mid	Wifi	4G	2024-03-06	No	Computer	Other	0.5	No	Private	2	Always	No	Yes	Yes	JO	Engineering	S	19	98	20	2	Yes	Under-7	H	CC	Moderate	Yes	Yes	70	19.343	47.8675	293.493	33.2079	648.44
Male	22	Non Government	No	Yes	Poor	Mobile Data	3G	2024-01-03	No	Mobile	State	0.5	No	Private	0	Never	No	No	Yes	KW	English	F	25	82	52	20	Yes	Above-7	M	BB	Low	Yes	Yes	58	21.237	40.1659	133.458	60.585	890.355
Male	24	Government	No	Yes	Mid	Wifi	4G	2024-01-03	No	Mobile	State	0.75	No	Bus	2	Always	Yes	Yes	Yes	JO	Biology	S	29	78	40	12	Yes	Above-7	M	CC	Low	Yes	Yes	52	18.685	63.0054	226.731	52.0791	632.546
Male	24	Non Government	Yes	Yes	Mid	Wifi	3G	2024-03-06	Yes	Mobile	Other	1	No	Private	0	Always	Yes	No	No	JO	Physics	F	45	87	57	80	Yes	Under-7	M	BB	Low	Yes	Yes	76	24.374	49.4102	925.573	62.08	761.897
Male	18	Government	No	No	Poor	Mobile Data	2G	2024-01-03	No	Mobile	State	0.5	No	Bus	12	Always	Yes	No	No	UAE	English	S	39	88	43	72	Yes	Under-7	M	BA	Low	Yes	Yes	51	29.2393	51.7362	513.495	55.352	525.913
Female	20	Government	No	No	Rich	Mobile Data	4G	2024-01-03	No	Mobile	State	0.5	No	Bus	0	Always	Yes	No	No	KW	Engineering	F	85	90	52	30	Yes	Under-7	H	CC	High	Yes	Yes	63	18.4721	42.1904	169.899	47.0536	649.915
Female	24	Government	No	No	Mid	Mobile Data	3G	2024-01-03	No	Mobile	Other	0.5	Yes	Private	12	Always	No	No	No	OM	Statistics	S	79	91	49	22	Yes	Under-7	H	AA	Low	Yes	Yes	74	19.4653	37.2723	963.754	84.2465	956.583
Female	23	Non Government	No	Yes	Mid	Wifi	4G	2024-03-06	No	Computer	State	0.75	Yes	Private	0	Always	Yes	No	Yes	KW	Mathematics	F	90	91	80	81	Yes	Under-7	H	CC	Moderate	Yes	Yes	80	23.4264	33.4364	891.093	41.0859	739.871
Male	20	Government	Yes	Yes	Mid	Mobile Data	4G	2024-01-03	No	Mobile	State	0.75	No	Bus	0	Always	Yes	No	No	LEB	Engineering	S	80	90	80	83	Yes	Under-7	H	CC	Moderate	Yes	Yes	71	29.2065	58.5648	779.214	70.8819	941.159
Male	18	Government	No	Yes	Rich	Mobile Data	4G	2024-01-03	No	Mobile	State	0.75	No	Bus	0	Always	Yes	Yes	Yes	OM	Environmental Science	F	80	83	82	71	Yes	Above-7	M	DD	Moderate	Yes	Yes	54	21.7939	37.8494	940.126	85.4787	941.212
Male	22	Non Government	No	Yes	Mid	Mobile Data	4G	2024-01-03	No	Mobile	Other	0.75	No	Private	0	Always	No	Yes	Yes	SA	Neuroscience	S	71	81	83	72	Yes	Above-7	M	DC	Moderate	Yes	Yes	60	24.0868	57.603	298.116	62.3202	966.489
Male	23	Non Government	No	Yes	Poor	Mobile Data	3G	0	No	Mobile	State	0.5	No	Bus	0	Always	No	Yes	Yes	KW	Physics	F	72	87	72	89	Yes	Above-7	M	DC	Low	Yes	Yes	77	18.4989	45.6151	852.732	82.5845	937.235
Female	24	Non Government	Yes	Yes	Poor	Wifi	3G	2024-03-06	No	Mobile	State	0.75	No	Private	0	Always	No	Yes	Yes	OM	Neuroscience	S	69	77	83	92	Yes	Above-7	M	DC	Low	Yes	Yes	67	19.7801	46.631	720.992	37.4911	401.969
Male	19	Government	No	No	Mid	Mobile Data	3G	0	No	Mobile	State	0.75	No	Private	0	Always	Yes	No	No	LEB	English	F	85	99	42	90	Yes	Under-7	H	DD	Low	Yes	Yes	63	29.8396	48.7671	882.783	59.6273	960.409
Male	23	Non Government	Yes	Yes	Mid	Wifi	3G	2024-03-06	Yes	Computer	State	0.75	No	Private	0	Always	No	Yes	No	SA	Neuroscience	S	89	96	45	92	Yes	Under-7	H	DD	Moderate	Yes	Yes	63	29.5814	44.7083	817.22	57.4215	482.476
Male	19	Non Government	No	Yes	Mid	Mobile Data	4G	2024-03-06	No	Mobile	Private	0.25	No	Private	2	Always	Yes	Yes	No	LEB	Physics	F	80	82	64	58	Yes	Under-7	H	CB	Moderate	Yes	Yes	73	18.0593	34.0248	411.846	30.4871	423.956
Male	24	Non Government	No	Yes	Mid	Mobile Data	3G	2024-01-03	No	Mobile	Private	0.25	No	Bus	2	Sometimes	No	6	No	LEB	Neuroscience	S	87	93	63	60	Yes	Under-7	H	DD	Moderate	Yes	Yes	65	29.4217	42.3853	796.959	56.5954	433.233
Male	23	Non Government	No	Yes	Mid	Mobile Data	3G	2024-01-03	No	Mobile	State	0.75	Yes	Private	0	Always	Yes	Yes	Yes	KW	Materials Science	F	15	9	14	80	No	Above-7	L	CB	Moderate	Yes	Yes	63	25.6694	56.5494	336.211	52.1418	609.35
Female	24	Non Government	No	No	Mid	Wifi	4G	0	No	Mobile	State	0.75	No	Private	0	Always	Yes	Yes	Yes	JO	English	S	9	6	15	85	No	Above-7	L	BB	Low	Yes	Yes	55	28.415	56.6314	395.733	70.1879	772.482
Male	19	Non Government	Yes	Yes	Mid	Mobile Data	3G	2024-01-03	No	Mobile	State	0.5	Yes	Bus	0	Sometimes	Yes	Yes	Yes	SA	Geology	F	81	86	86	41	Yes	Under-7	M	CB	Moderate	Yes	Yes	72	23.4569	41.449	197.115	86.2998	641.387
Male	24	Non Government	Yes	Yes	Mid	Mobile Data	3G	2024-03-06	Yes	Mobile	State	0.5	Yes	Private	0	Always	No	Yes	No	UAE	Chemistry	S	78	82	78	53	Yes	Under-7	M	BB	Moderate	Yes	Yes	83	24.1872	48.4041	941.569	35.1475	415.333
Male	22	Non Government	No	Yes	Poor	Mobile Data	4G	2024-01-03	No	Mobile	State	0.75	Yes	Bus	2	Always	Yes	No	Yes	UAE	Mathematics	F	80	87	74	68	Yes	Under-7	M	DD	Low	Yes	Yes	65	23.8662	37.7379	361.903	49.6486	685.89
Male	18	Non Government	No	Yes	Mid	Mobile Data	3G	2024-01-03	No	Mobile	Other	0.5	No	Private	12	Always	Yes	Yes	No	KW	Chemistry	S	85	88	79	70	Yes	Under-7	M	DD	Moderate	Yes	Yes	60	26.0024	38.4149	568.56	56.6439	665.278
Male	20	Non Government	No	Yes	Poor	Mobile Data	3G	2024-01-03	No	Mobile	Other	0.5	Yes	Bus	12	Always	No	Yes	No	SA	Physics	F	2	7	4	8	No	Above-7	L	DD	Moderate	Yes	Yes	65	19.6758	30.9219	452.2	57.3111	854.11
Male	18	Non Government	No	Yes	Poor	Wifi	3G	2024-01-03	No	Mobile	State	1	No	Private	2	Always	Yes	Yes	Yes	LEB	Chemistry	S	5	4	5	8	No	Above-7	L	CB	Moderate	Yes	Yes	68	18.3597	65.8699	963.935	76.4886	567.768
Male	21	Non Government	Yes	Yes	Mid	Wifi	4G	2024-01-03	Yes	Mobile	State	0.75	No	Private	0	Never	No	No	Yes	LEB	Neuroscience	F	50	77	14	28	No	Under-7	M	CC	Moderate	Yes	Yes	74	21.6952	38.4283	401.544	56.6037	530.519
Male	19	Non Government	No	Yes	Mid	Wifi	4G	0	No	Mobile	State	0.5	No	Private	2	Always	Yes	No	No	SA	Mathematics	S	55	74	25	29	No	Under-7	M	DC	Low	Yes	Yes	54	26.4562	39.1014	800.691	31.6297	553.563
Female	24	Government	No	Yes	Mid	Wifi	4G	2024-01-03	No	Mobile	State	0.75	No	Bus	0	Always	Yes	Yes	No	JO	Statistics	F	30	17	14	57	No	Above-7	L	DC	High	Yes	Yes	72	20.4222	41.1841	869.875	72.6062	582.244
Male	19	Non Government	Yes	No	Mid	Wifi	4G	2024-03-06	Yes	Computer	State	0.5	No	Private	0	Always	Yes	No	No	LEB	Chemistry	S	35	14	23	62	No	Above-7	L	DC	Moderate	Yes	Yes	62	26.0812	35.0963	492.046	83.0898	759.499
Male	19	Non Government	Yes	No	Poor	Mobile Data	3G	2024-03-06	Yes	Mobile	State	0.5	No	Bus	0	Sometimes	No	No	Yes	KW	Environmental Science	F	4	8	10	60	Yes	Above-7	L	DC	Moderate	Yes	Yes	64	29.6389	55.5705	440.355	60.8343	682.915
Male	24	Non Government	No	Yes	Mid	Wifi	4G	2024-03-06	No	Computer	State	1	Yes	Bus	0	Always	No	Yes	Yes	UAE	Physics	F	80	90	55	19	Yes	Under-7	H	DC	Moderate	Yes	Yes	75	19.1268	33.0057	772.971	64.8665	602.137
Female	23	Government	No	Yes	Mid	Mobile Data	4G	0	No	Mobile	State	0.5	No	Private	0	Always	Yes	No	No	UAE	Neuroscience	F	50	70	19	15	Yes	Under-7	H	DD	Low	Yes	Yes	57	26.0712	35.3681	921.606	39.7762	624.588
Male	22	Non Government	No	Yes	Mid	Wifi	2G	2024-03-06	No	Mobile	State	None	Yes	Bus	0	Always	No	Yes	No	SA	Biology	F	55	89	40	40	Yes	Under-7	H	CB	Moderate	Yes	Yes	78	23.325	55.7903	779.439	43.2388	622.554
Female	21	Non Government	Yes	Yes	Mid	Wifi	4G	2024-01-03	No	Mobile	State	0.5	No	Bus	0	Always	Yes	No	No	UAE	Mathematics	F	80	44	35	10	No	Above-7	L	DC	Low	Yes	Yes	74	28.4177	43.5864	304.414	44.1102	983.444
Female	21	Government	No	Yes	Mid	Mobile Data	4G	2024-01-03	No	Mobile	Other	1	Yes	Bus	0	Sometimes	No	No	No	LEB	English	F	100	80	2	70	No	Under-7	H	CC	Low	Yes	Yes	47	20.1258	58.3179	899.477	55.8445	539.798
Female	20	Non Government	No	Yes	Mid	Mobile Data	4G	2024-01-03	No	Mobile	State	0.75	No	Bus	0	Sometimes	No	No	No	UAE	Geology	F	14	60	11	75	Yes	Under-7	H	DD	Moderate	Yes	Yes	66	26.3115	52.297	448.824	85.6887	890.837
Female	18	Government	No	Yes	Rich	Wifi	4G	2024-01-03	No	Mobile	State	0.75	Yes	Private	0	Always	No	No	Yes	JO	Biology	F	6	2	38	12	No	Under-7	M	DC	Moderate	Yes	Yes	80	28.0574	40.2408	618.606	61.3071	824.927
Female	23	Non Government	No	No	Mid	Wifi	4G	2024-03-06	No	Mobile	State	0.75	No	Private	0	Never	No	No	No	SA	Engineering	F	10	3	0	30	No	Under-7	M	DD	Moderate	Yes	Yes	73	29.3354	56.0331	848.292	41.5259	403.342
Male	24	Non Government	No	No	Mid	Mobile Data	3G	0	No	Mobile	State	0.5	No	Private	0	Never	No	No	No	SA	Materials Science	F	50	7	9	50	Yes	Above-7	M	DD	Low	Yes	Yes	95	26.199	34.6509	269.555	45.9653	995.906
Male	22	Non Government	No	Yes	Poor	Wifi	4G	2024-01-03	No	Mobile	State	0.75	No	Private	0	Sometimes	No	Yes	Yes	KW	Computer Science	F	50	90	40	90	Yes	Under-7	M	DC	Moderate	Yes	Yes	62	23.9661	51.4564	806.059	53.0409	853.864
Female	19	Non Government	Yes	Yes	Mid	Wifi	3G	2024-03-06	Yes	Computer	State	0.75	No	Bus	2	Always	No	No	Yes	OM	Environmental Science	F	70	92	50	7	Yes	Under-7	H	DD	Moderate	Yes	Yes	76	25.4142	47.4859	636.547	67.3955	809.47
Female	19	Non Government	No	Yes	Poor	Mobile Data	3G	2024-01-03	No	Mobile	State	0.5	No	Bus	0	Always	No	No	Yes	OM	Engineering	F	2	6	2	8	No	Above-7	L	DD	Low	Yes	Yes	72	28.4269	40.7149	904.007	56.402	643.195
Male	20	Non Government	Yes	Yes	Mid	Mobile Data	3G	2024-03-06	Yes	Mobile	Private	0.75	No	Bus	12	Always	No	Yes	Yes	LEB	Chemistry	F	1	7	6	10	No	Above-7	L	DD	Moderate	Yes	Yes	58	24.8473	54.1602	254.773	53.5467	733.122
Male	23	Government	Yes	Yes	Mid	Mobile Data	3G	2024-01-03	Yes	Mobile	State	0.5	No	Private	0	Sometimes	No	Yes	No	OM	Environmental Science	F	0	12	3	3	Yes	Above-7	M	BB	Moderate	Yes	Yes	73	18.3646	64.8533	478.614	63.8837	551.963
Female	19	Non Government	No	Yes	Mid	Wifi	4G	2024-03-06	No	Computer	State	0.75	Yes	Private	0	Always	Yes	No	No	KW	English	F	0	0	5	80	Yes	Above-7	L	DD	Moderate	Yes	Yes	65	29.1714	69.9562	849.559	44.5101	421.29
Female	18	Non Government	No	Yes	Mid	Wifi	4G	2024-01-03	No	Mobile	State	0.75	No	Private	0	Always	No	No	No	UAE	Computer Science	F	12	26	7	40	Yes	Under-7	M	DD	Low	Yes	Yes	97	26.2743	54.3105	117.309	34.7342	901.613
Male	18	Government	No	No	Mid	Wifi	4G	2024-01-03	No	Mobile	State	0.75	Yes	Private	0	Always	No	Yes	Yes	OM	Computer Science	F	70	90	41	33	Yes	Under-7	H	DC	Low	Yes	Yes	74	26.1182	46.1882	200.981	31.4649	937.891
Male	20	Government	No	No	Poor	Mobile Data	3G	2024-01-03	No	Mobile	Private	1	No	Private	2	Sometimes	Yes	Yes	No	OM	Materials Science	F	7	12	5	3	No	Above-7	M	DC	Low	Yes	Yes	65	20.5881	39.0083	991.509	45.0755	497.482
Male	19	Non Government	No	Yes	Poor	Wifi	3G	2024-01-03	No	Mobile	Private	0.5	No	Bus	0	Sometimes	No	Yes	No	SA	Statistics	F	90	70	30	14	No	Under-7	M	DD	Moderate	Yes	Yes	63	25.9066	40.2838	352.355	35.4955	872.234
Female	23	Non Government	No	Yes	Mid	Mobile Data	3G	2024-01-03	No	Mobile	State	0.5	No	Private	2	Never	No	Yes	No	KW	Mathematics	F	70	88	55	40	Yes	Under-7	H	BA	Moderate	Yes	Yes	59	22.7264	49.1782	977.989	50.1804	844.692
Male	24	Government	No	Yes	Mid	Wifi	4G	2024-01-03	No	Mobile	Private	1	No	Private	0	Always	No	No	Yes	KW	Statistics	F	77	80	51	80	No	Under-7	M	BA	Moderate	Yes	Yes	64	25.8148	44.6911	264.278	76.376	507.025
Male	23	Non Government	No	Yes	Mid	Mobile Data	4G	2024-01-03	No	Mobile	Other	0.5	Yes	Private	0	3	No	Yes	Yes	LEB	Geology	F	2	5	3	50	No	Above-7	L	BA	Moderate	Yes	Yes	71	19.2791	66.5526	424.985	72.9777	653.097
Male	18	Non Government	No	Yes	Poor	Mobile Data	3G	2024-01-03	No	Mobile	Other	0.5	No	Private	0	Never	No	Yes	No	SA	Materials Science	F	25	27	0	69	No	Above-7	L	AA	Low	Yes	Yes	74	25.8941	44.7318	777.583	66.6557	653.655
Male	23	Government	Yes	Yes	Rich	Wifi	4G	2024-01-03	No	Mobile	State	1	Yes	Private	8	Always	Yes	Yes	Yes	KW	Computer Science	F	11	2	0	50	No	Above-7	L	BA	High	Yes	Yes	60	29.993	44.9378	692.001	81.15	855.979
Male	18	Non Government	No	Yes	Poor	Mobile Data	3G	2024-01-03	No	Mobile	State	1	Yes	Bus	0	Always	Yes	Yes	Yes	JO	Statistics	F	0	8	11	70	Yes	Above-7	L	AA	Low	Yes	Yes	78	18.5785	45.3414	623.01	46.9241	902.597
Female	22	Non Government	Yes	Yes	Mid	Mobile Data	3G	2024-03-06	Yes	Mobile	State	1	No	Private	0	Always	Yes	Yes	Yes	UAE	English	F	77	80	12	19	Yes	Above-7	M	AA	Low	Yes	Yes	69	29.7261	63.4648	576.909	83.1032	456.865
Female	24	Non Government	No	Yes	Mid	Wifi	4G	2024-03-06	No	Mobile	Private	0.5	No	Private	0	Always	No	Yes	No	JO	English	F	25	29	40	17	No	Under-7	H	AA	Moderate	Yes	Yes	67	22.8829	56.0315	859.096	53.9544	737.782
Female	23	Non Government	No	Yes	Poor	Mobile Data	4G	2024-01-03	No	Mobile	State	1	No	Bus	0	Never	No	Yes	No	UAE	Engineering	F	24	35	23	22	Yes	Above-7	M	AA	Low	Yes	Yes	68	28.449	54.5668	311.454	54.0536	857.049
Male	24	Government	No	Yes	Mid	Wifi	4G	2024-01-03	No	Mobile	State	0.75	No	Private	0	Always	No	No	Yes	OM	Engineering	F	60	60	3	60	No	Under-7	M	BA	Low	Yes	Yes	72	27.3886	43.3657	498.224	54.3211	871.714
Male	19	Non Government	No	Yes	Poor	Wifi	4G	2024-01-03	No	Mobile	Private	0.5	Yes	Bus	2	Sometimes	No	No	Yes	JO	Engineering	F	21	12	0	50	Yes	Under-7	M	AA	Moderate	Yes	Yes	73	24.8042	62.7162	239.907	35.8857	488.796
Male	21	Government	No	Yes	Mid	Wifi	4G	2024-01-03	No	Mobile	State	0.5	Yes	Bus	0	Sometimes	Yes	Yes	Yes	JO	Engineering	F	0	4	8	30	No	Above-7	L	Fail	Moderate	No	No	57	26.8614	31.5346	636.347	88.5294	715.303
Female	22	Government	No	Yes	Mid	Wifi	4G	2024-01-03	Yes	Mobile	State	1	No	Private	0	Always	Yes	No	Yes	OM	Geology	F	66	90	55	12	Yes	Above-7	M	BA	Low	Yes	Yes	84	28.5422	64.8319	325.49	38.3104	914.535
Female	20	Non Government	No	Yes	Mid	Wifi	4G	2024-01-03	No	Mobile	Other	0.5	No	Private	12	Always	Yes	No	No	KW	Engineering	F	70	98	7	5	Yes	Under-7	M	AA	Moderate	Yes	Yes	78	22.8497	50.51	400.458	50.4531	591.111
Male	23	Non Government	No	Yes	Poor	Mobile Data	4G	2024-01-03	Yes	Mobile	State	0.75	Yes	Bus	0	Always	No	No	Yes	UAE	Statistics	F	0	6	4	15	Yes	Under-7	L	BB	High	Yes	Yes	70	21.9244	45.93	524.126	49.158	655.07
Male	19	Non Government	Yes	Yes	Mid	Mobile Data	4G	2024-01-03	No	Mobile	State	1	Yes	Private	0	Always	No	Yes	Yes	UAE	Materials Science	F	12	30	0	17	No	Above-7	L	BA	Moderate	Yes	Yes	70	26.0111	49.8867	124.094	34.4808	882.615
Female	22	Non Government	No	Yes	Mid	Wifi	4G	2024-03-06	No	Mobile	Private	0.75	Yes	Bus	12	Sometimes	No	Yes	6	LEB	Mathematics	F	2	9	7	55	Yes	Under-7	M	BB	Moderate	Yes	Yes	68	27.6942	56.6966	182.744	39.1356	453.592
Male	23	Government	No	Yes	Mid	Mobile Data	4G	2024-01-03	No	Mobile	State	0.75	No	Private	0	Never	No	No	No	OM	Physics	F	55	33	6	9	No	Above-7	L	AA	Moderate	Yes	Yes	61	27.1474	30.5106	717.336	32.6915	915.696
Male	24	Non Government	No	Yes	Mid	Mobile Data	3G	2024-01-03	No	Mobile	State	0.75	No	Bus	0	Never	No	No	No	LEB	Mathematics	F	12	10	20	16	No	Under-7	L	Fail	Moderate	No	No	54	27.5738	64.8621	486.073	47.5443	586.694
Male	22	Non Government	No	Yes	Mid	Mobile Data	2G	2024-01-03	No	Mobile	State	0.5	Yes	Private	0	Always	Yes	Yes	Yes	JO	Computer Science	F	70	90	2	2	Yes	Under-7	L	BB	Low	Yes	Yes	73	23.227	47.8696	878.311	81.9994	400.87
Female	18	Non Government	No	Yes	Mid	Mobile Data	4G	2024-01-03	No	Mobile	State	0.5	Yes	Private	0	Always	Yes	Yes	No	LEB	Chemistry	F	7	9	5	30	No	Above-7	L	AA	Moderate	Yes	Yes	58	27.814	43.7187	725.205	50.3665	540.495
Male	24	Non Government	Yes	Yes	Mid	Mobile Data	3G	2024-01-03	No	Mobile	Private	1	No	Private	0	Sometimes	No	Yes	Yes	LEB	Chemistry	F	80	42	20	50	Yes	Under-7	M	CB	Low	Yes	Yes	53	19.4425	35.5298	107.291	37.4215	453.7
Male	20	Government	No	No	Mid	Mobile Data	2G	2024-01-03	No	Mobile	Private	1	No	Private	0	Always	No	Yes	No	UAE	Geology	S	0	3	10	3	No	Above-7	L	BB	Low	Yes	Yes	58	24.5339	47.5786	655.041	68.7416	455.431
Male	20	Non Government	No	No	Poor	Mobile Data	4G	2024-01-03	Yes	Mobile	State	1	No	Bus	0	Always	Yes	Yes	Yes	JO	Mathematics	S	12	60	0	70	Yes	Above-7	L	BB	Low	Yes	Yes	62	18.0691	49.8529	184.352	89.7961	815.701
Male	18	Non Government	No	Yes	Mid	Mobile Data	3G	2024-01-03	No	Mobile	State	0.75	No	Private	0	Sometimes	No	Yes	Yes	JO	English	S	80	80	15	70	Yes	Under-7	H	AA	Low	Yes	Yes	64	21.895	46.1459	802.84	43.9394	528.386
Female	19	Government	No	No	Poor	Mobile Data	4G	0	No	Mobile	State	0.5	Yes	Private	0	Never	No	No	Yes	OM	Physics	S	70	80	95	70	Yes	Under-7	H	BA	Low	Yes	Yes	72	22.3975	57.1464	992.357	46.7743	960.845
Female	19	Government	No	No	Mid	Mobile Data	4G	0	No	Mobile	State	0.5	Yes	Bus	0	Sometimes	No	No	Yes	SA	Physics	S	70	80	95	70	Yes	Under-7	H	Fail	Low	No	No	53	22.7541	46.8359	578.079	88.3108	709.867
Female	19	Non Government	Yes	Yes	Mid	Wifi	4G	2024-01-03	No	Mobile	Private	1	No	Private	0	Always	Yes	No	No	LEB	English	F	60	80	50	40	No	Under-7	M	BA	Low	Yes	Yes	73	26.3456	68.4567	714.502	40.7266	676.059
Female	24	Non Government	Yes	Yes	Poor	Wifi	4G	2024-01-03	Yes	Computer	State	0.75	Yes	Bus	12	Sometimes	No	No	Yes	LEB	Environmental Science	F	100	80	95	90	No	Under-7	H	Fail	High	No	No	64	22.6627	53.9711	313.583	60.6728	660.57
Male	18	Non Government	No	No	Mid	Mobile Data	4G	2024-01-03	Yes	Mobile	State	0.75	Yes	Bus	2	Sometimes	No	No	Yes	OM	English	F	100	85	85	70	No	Under-7	M	Fail	Moderate	No	No	72	23.3843	62.2991	493.838	44.3791	815.553
Male	21	Government	Yes	No	Poor	Mobile Data	4G	0	No	Mobile	State	0.5	Yes	Private	0	Always	No	Yes	No	KW	Environmental Science	F	10	60	5	20	Yes	Above-7	L	CC	Low	Yes	Yes	63	20.8505	34.3742	870.486	85.9411	671.358
Male	19	Non Government	Yes	Yes	Mid	Mobile Data	3G	2024-03-06	Yes	Mobile	State	0.75	No	Private	0	Never	No	Yes	Yes	UAE	Physics	S	19	65	50	10	No	Above-7	L	CC	Moderate	Yes	Yes	64	22.479	45.8917	250.681	88.8913	477.16
Male	22	Non Government	No	Yes	Mid	Wifi	4G	0	No	Mobile	Private	0.75	No	Private	0	Always	Yes	No	No	JO	Environmental Science	S	10	75	55	11	Yes	Under-7	M	AA	Low	Yes	Yes	68	20.7272	43.4739	338.982	78.8819	928.103
Male	18	Non Government	No	Yes	Mid	Wifi	4G	0	No	Mobile	State	0.75	Yes	Bus	12	Sometimes	No	Yes	No	KW	Physics	S	80	90	55	19	Yes	Under-7	H	CB	Low	Yes	Yes	63	18.8784	52.7793	500.89	48.887	657.037
Male	22	Non Government	No	Yes	Poor	Mobile Data	4G	2024-01-03	No	Mobile	Private	1	No	Private	12	Always	Yes	No	Yes	KW	Environmental Science	S	10	10	15	19	No	Above-7	L	BB	Moderate	Yes	Yes	75	25.2414	64.4445	741.024	54.2092	444.403
Male	21	Non Government	No	Yes	Mid	Mobile Data	4G	2024-01-03	No	Mobile	Other	0.5	Yes	Private	0	Always	Yes	Yes	No	LEB	Chemistry	S	70	75	55	11	Yes	Under-7	M	AA	Moderate	Yes	Yes	72	26.0186	33.1335	438.296	44.5383	717.62
Female	20	Non Government	No	Yes	Mid	Wifi	4G	2024-01-03	No	Mobile	Other	0.5	Yes	Private	0	Always	Yes	No	Yes	LEB	Chemistry	S	100	75	50	70	Yes	Under-7	H	AA	Moderate	Yes	Yes	63	25.4339	32.903	934.959	83.4455	788.408
Female	22	Non Government	No	Yes	Mid	Mobile Data	4G	2024-01-03	No	Mobile	State	0.5	No	Private	2	Never	No	No	No	SA	English	S	10	79	30	30	No	Under-7	M	AA	Moderate	Yes	Yes	43	23.5619	64.0127	185.011	84.8735	565.349
Female	19	Government	No	Yes	Mid	Mobile Data	4G	2024-01-03	Yes	Mobile	Private	0.5	Yes	Bus	2	Always	No	Yes	No	UAE	Mathematics	S	60	55	30	40	No	Under-7	M	AA	Moderate	Yes	Yes	52	22.5574	38.514	433.724	55.1322	880.204
Female	20	Government	No	Yes	Rich	Mobile Data	4G	2024-01-03	Yes	Mobile	Private	0.5	No	Bus	12	Always	Yes	No	Yes	JO	Engineering	S	100	75	50	70	Yes	Under-7	H	AA	Low	Yes	Yes	63	28.36	56.7501	738.059	69.392	801.866
Male	24	Non Government	No	Yes	Poor	Mobile Data	4G	2024-01-03	No	Mobile	State	0.5	No	Private	2	Always	Yes	No	Yes	LEB	Statistics	S	80	80	51	59	Yes	Under-7	H	BA	Moderate	Yes	Yes	54	24.229	51.7151	303.388	39.9332	790.205
Male	24	Non Government	No	Yes	Rich	Wifi	4G	2024-03-06	No	Tab	State	0.75	No	Private	0	Always	No	Yes	Yes	UAE	Astronomy	S	23	63	71	89	Yes	Under-7	M	CC	High	Yes	Yes	77	23.7502	63.3157	690.772	56.0962	652.495
Female	23	Government	No	No	Mid	Mobile Data	4G	2024-01-03	No	Mobile	State	0.5	Yes	Bus	2	Sometimes	No	Yes	Yes	LEB	English	S	100	91	98	40	Yes	Under-7	H	BA	Moderate	Yes	Yes	70	18.3077	35.0036	247.795	67.8899	977.149
Male	20	Non Government	No	Yes	Mid	Mobile Data	4G	2024-01-03	No	Mobile	Other	0.5	No	Bus	0	Always	No	No	No	KW	Astronomy	S	10	51	40	40	No	Above-7	L	CC	Moderate	Yes	Yes	53	22.095	35.1913	150.382	53.1242	564.514
Male	20	Non Government	No	Yes	Mid	Wifi	4G	2024-01-03	No	Mobile	State	0.5	No	Bus	12	Never	No	Yes	No	JO	Chemistry	S	70	50	33	41	No	Above-7	M	Fail	Moderate	No	No	75	22.5623	52.2727	208.914	51.456	746.623
Male	18	Non Government	No	Yes	Rich	Wifi	4G	2024-03-06	No	Computer	Private	0.5	No	Private	12	Sometimes	No	No	No	OM	Environmental Science	S	70	58	73	91	Yes	Under-7	H	BA	High	Yes	Yes	68	22.7859	67.8551	936.986	30.0599	585.433
Female	20	Non Government	Yes	Yes	Mid	Mobile Data	3G	2024-03-06	Yes	Mobile	Private	0.75	Yes	Private	8	Sometimes	No	Yes	No	KW	Engineering	S	70	50	30	49	Yes	Under-7	M	Fail	Moderate	No	No	60	24.9621	46.5999	596.576	78.2576	846.883
Male	24	Non Government	No	Yes	Mid	Wifi	4G	2024-01-03	No	Mobile	Private	0.75	No	Private	0	Always	Yes	No	No	SA	Materials Science	S	70	50	33	40	No	Under-7	M	Fail	Low	No	No	77	24.4032	43.0777	816.711	83.3603	428.675
Male	24	Non Government	No	Yes	Poor	Mobile Data	4G	2024-01-03	No	Mobile	State	1	No	Private	0	Always	Yes	No	No	SA	Neuroscience	S	22	51	48	10	No	Above-7	L	AA	Moderate	Yes	Yes	54	25.2949	54.2676	399.389	88.1678	427.536
Female	24	Government	No	No	Poor	Mobile Data	4G	2024-03-06	No	Mobile	State	0.75	Yes	Private	12	Never	No	No	Yes	LEB	Chemistry	S	62	68	48	80	Yes	Under-7	M	BA	Moderate	Yes	Yes	72	27.1786	67.2179	633.393	73.1563	886.517
Female	21	Non Government	No	Yes	Mid	Wifi	4G	2024-01-03	No	Computer	State	0.5	No	Private	0	Always	No	Yes	No	JO	Mathematics	S	82	89	58	50	Yes	Under-7	H	BA	Low	Yes	Yes	55	27.7558	63.4771	545.457	62.9275	660.561
Male	20	Government	Yes	Yes	Mid	Wifi	4G	2024-01-03	Yes	Tab	State	1	No	Private	0	Always	Yes	No	No	OM	English	S	72	80	58	66	No	Under-7	M	AA	Moderate	Yes	Yes	64	26.6175	69.8193	951.164	46.1571	604.708
Female	24	Non Government	No	Yes	Rich	Mobile Data	3G	2024-01-03	No	Mobile	State	0.5	No	Private	0	Always	Yes	No	No	SA	Neuroscience	S	70	82	3	73	No	Under-7	H	BA	Moderate	Yes	Yes	68	29.4663	30.9027	772.817	89.958	764.516
Female	20	Non Government	No	Yes	Mid	Wifi	4G	2024-03-06	No	Tab	State	0.75	No	Private	12	Always	Yes	No	No	OM	Statistics	S	60	82	93	43	No	Above-7	M	BA	Moderate	Yes	Yes	64	18.2188	34.5143	757.488	65.3852	821.14
Male	19	Government	Yes	Yes	Mid	Mobile Data	3G	2024-01-03	Yes	Mobile	Private	0.5	No	Bus	2	Sometimes	No	No	Yes	OM	Engineering	S	55	72	83	14	Yes	Above-7	M	BB	Moderate	Yes	Yes	63	20.3493	54.3787	141.718	70.8692	520.721
Female	20	Non Government	No	Yes	Poor	Mobile Data	4G	2024-01-03	No	Mobile	State	1	Yes	Bus	0	Never	No	No	Yes	KW	Statistics	S	72	65	73	66	Yes	Under-7	H	AA	Moderate	Yes	Yes	67	18.0908	62.8231	594.703	70.9444	511.259
Male	18	Non Government	No	No	Mid	Wifi	4G	2024-01-03	No	Mobile	State	1	No	Bus	0	Never	No	No	No	LEB	Physics	S	51	82	53	43	No	Under-7	M	AA	Low	Yes	Yes	65	25.7697	41.4098	520.292	80.7151	974.89
Male	21	Non Government	No	Yes	Poor	Mobile Data	3G	2024-01-03	No	Mobile	State	0.5	Yes	Bus	0	Always	Yes	Yes	Yes	LEB	Mathematics	S	80	92	83	43	Yes	Under-7	H	BB	Moderate	Yes	Yes	55	28.7764	39.5684	935.058	30.5804	753.799
Male	23	Non Government	No	Yes	Mid	Wifi	4G	2024-01-03	No	Mobile	State	0.25	Yes	Private	12	Always	Yes	Yes	No	JO	Computer Science	S	60	52	23	33	Yes	Under-7	H	AA	Moderate	Yes	Yes	71	20.9218	61.479	331.608	43.2148	634.07
Male	18	Non Government	No	Yes	Mid	Wifi	4G	2024-01-03	No	Mobile	State	0.5	No	Private	2	Always	Yes	No	Yes	SA	English	S	30	12	29	23	No	Under-7	M	BA	Moderate	Yes	Yes	63	29.1244	32.2553	342.85	69.932	880.865
Male	21	Non Government	No	Yes	Poor	Mobile Data	3G	2024-01-03	No	Mobile	State	0.5	No	Bus	0	Always	No	Yes	No	UAE	Materials Science	S	40	62	83	33	Yes	Under-7	H	BB	Low	Yes	Yes	55	18.7232	44.7753	470.212	83.7087	715.095
Male	20	Non Government	No	Yes	Mid	Wifi	4G	2024-03-06	No	Tab	State	0.5	No	Bus	0	Always	Yes	Yes	No	KW	Biology	S	60	52	23	33	No	Under-7	M	AA	Moderate	Yes	Yes	57	29.2132	50.2324	319.033	71.1203	544.998
Male	20	Government	No	Yes	Mid	Wifi	4G	0	No	Mobile	Private	0.5	Yes	Private	0	Always	Yes	Yes	Yes	OM	Astronomy	S	20	22	53	13	No	Above-7	L	AA	Low	Yes	Yes	68	22.2195	52.4139	216.266	54.8095	524.041
Male	20	Non Government	No	Yes	Mid	Wifi	4G	2024-01-03	No	Mobile	State	0.5	No	Bus	0	Never	No	No	No	LEB	English	S	20	52	23	33	Yes	Above-7	L	BB	Low	Yes	Yes	67	19.217	59.1446	871.673	51.6933	638.116
Female	18	Non Government	No	Yes	Poor	Mobile Data	3G	2024-01-03	No	Mobile	Other	0.75	No	Private	0	Never	No	No	Yes	SA	Astronomy	S	50	62	73	43	Yes	Above-7	M	CC	Low	Yes	Yes	69	23.8305	44.1938	602.449	74.2769	915.938
Male	23	Non Government	No	Yes	Rich	Mobile Data	3G	2024-01-03	No	Mobile	State	1	Yes	Bus	0	Always	No	Yes	Yes	SA	Environmental Science	S	10	2	13	53	No	Above-7	L	CC	Moderate	Yes	Yes	74	21.0813	54.5074	875.226	74.4743	436.869
Male	20	Non Government	No	Yes	Mid	Mobile Data	4G	0	No	Mobile	State	0.5	Yes	Private	0	Always	No	Yes	No	UAE	Chemistry	S	60	52	23	33	Yes	Under-7	H	BB	Low	Yes	Yes	63	21.4185	53.415	848.021	66.4235	531.116
Female	23	Non Government	No	Yes	Mid	Mobile Data	4G	2024-01-03	No	Mobile	State	0.5	No	Private	2	Always	Yes	No	No	JO	Environmental Science	S	15	52	83	11	Yes	Under-7	M	AA	Moderate	Yes	Yes	62	21.6875	51.9046	353.838	47.488	935.891
Female	19	Non Government	No	Yes	Poor	Mobile Data	3G	2024-01-03	No	Mobile	State	0.5	Yes	Bus	0	Always	Yes	Yes	No	JO	English	S	80	42	33	13	Yes	Under-7	H	BA	Low	Yes	Yes	77	27.6363	55.6193	592.964	85.5093	473.041
Male	24	Non Government	No	No	Mid	Mobile Data	3G	2024-03-06	Yes	Mobile	Private	0.5	No	Bus	2	Always	Yes	No	Yes	UAE	Computer Science	S	40	51	20	33	No	Under-7	M	BA	Low	Yes	Yes	74	24.4699	40.378	174.896	63.1128	777.775
Female	19	Government	Yes	No	Mid	Mobile Data	3G	2024-01-03	No	Mobile	Private	0.75	No	Private	12	Always	Yes	Yes	No	SA	Materials Science	S	60	70	63	93	Yes	Under-7	H	AA	Moderate	Yes	Yes	69	21.7357	33.386	923.727	77.4295	528.107
Male	19	Non Government	No	Yes	Poor	Mobile Data	4G	2024-01-03	No	Mobile	Other	0.75	Yes	Bus	12	Always	Yes	Yes	Yes	SA	Environmental Science	S	50	62	13	33	No	Above-7	L	BA	Moderate	Yes	Yes	72	25.324	34.7709	463.836	42.8585	763.52
Male	19	Government	No	Yes	Mid	Wifi	4G	2024-01-03	No	Mobile	State	0.5	Yes	Bus	2	Sometimes	No	No	Yes	LEB	Chemistry	S	85	75	62	53	Yes	Under-7	H	AA	Moderate	Yes	Yes	64	26.5938	38.9833	454.309	50.6424	629.863
Female	21	Non Government	No	No	Mid	Mobile Data	4G	2024-01-03	No	Mobile	State	1	No	Private	0	Always	Yes	No	Yes	SA	Neuroscience	S	25	15	32	53	No	Under-7	M	BA	Moderate	Yes	Yes	69	21.2715	50.0079	372.48	82.4748	461.006
Male	20	Government	No	No	Mid	Mobile Data	3G	0	No	Mobile	State	0.5	No	Bus	0	Always	No	Yes	Yes	KW	Astronomy	S	10	35	30	13	No	Above-7	L	AA	Low	Yes	Yes	74	22.9626	63.6177	514.597	33.0064	749.485
Male	20	Non Government	No	Yes	Mid	Mobile Data	3G	2024-01-03	No	Mobile	Private	0.5	No	Private	2	Always	Yes	No	Yes	OM	Chemistry	S	87	65	82	33	Yes	Under-7	H	AA	Moderate	Yes	Yes	75	19.4626	58.0517	326.583	60.7389	809.826
Male	19	Government	Yes	Yes	Mid	Wifi	3G	2024-01-03	No	Mobile	State	0.5	Yes	Private	2	Always	No	Yes	No	UAE	Mathematics	S	85	15	22	53	Yes	Under-7	M	AA	Low	Yes	Yes	66	20.1738	61.5616	437.367	58.9023	808.164
Female	22	Non Government	No	Yes	Poor	Wifi	4G	2024-03-06	No	Mobile	State	0.5	No	Private	0	Never	No	Yes	No	UAE	Materials Science	S	80	71	52	51	Yes	Under-7	M	AA	Low	Yes	Yes	52	26.1734	44.039	819.952	75.0738	782.221
Male	21	Non Government	Yes	No	Mid	Mobile Data	3G	2024-01-03	Yes	Mobile	State	0.5	No	Bus	0	Always	Yes	No	Yes	SA	Environmental Science	S	75	71	72	53	Yes	Under-7	H	CB	Moderate	Yes	Yes	81	20.1773	46.1861	850.83	46.9136	700.135
Female	19	Non Government	No	Yes	Mid	Wifi	4G	2024-03-06	No	Mobile	Other	0.5	No	Bus	0	Always	Yes	Yes	Yes	JO	Environmental Science	S	85	66	12	23	No	Under-7	M	AA	Moderate	Yes	Yes	74	24.302	45.7473	373.764	43.144	711.684
Male	19	Non Government	Yes	Yes	Mid	Wifi	4G	2024-01-03	Yes	Mobile	State	0.5	No	Bus	8	Always	Yes	No	Yes	KW	Biology	S	23	25	32	53	No	Under-7	L	BB	Moderate	Yes	Yes	60	26.5086	37.6749	522.113	85.568	781.384
Male	21	Non Government	No	Yes	Mid	Mobile Data	4G	2024-01-03	No	Mobile	State	0.5	No	Bus	0	Always	Yes	Yes	No	OM	Mathematics	S	15	25	37	13	Yes	Above-7	L	CC	Low	Yes	Yes	79	19.2825	32.4487	886.438	64.3026	814.156
Male	21	Government	No	Yes	Mid	Wifi	4G	2024-01-03	No	Mobile	State	0.5	No	Bus	0	Always	No	Yes	Yes	UAE	Mathematics	S	95	91	62	53	Yes	Under-7	M	BB	Low	Yes	Yes	71	24.8077	53.6366	147.406	36.2814	792.926
Male	19	Non Government	No	Yes	Mid	Mobile Data	4G	2024-01-03	No	Mobile	State	0.5	No	Bus	0	Always	No	No	Yes	OM	Statistics	S	81	75	62	53	No	Under-7	M	AA	Moderate	Yes	Yes	63	21.0788	69.5687	900.23	41.5822	752.167
Male	24	Government	No	No	Poor	Mobile Data	4G	0	No	Mobile	Private	0.75	No	Private	2	Never	Yes	No	Yes	OM	Engineering	S	53	75	72	23	No	Under-7	M	BA	Low	Yes	Yes	67	29.5551	36.6732	297.266	89.9296	493.503
Male	19	Non Government	No	Yes	Mid	Mobile Data	4G	2024-01-03	No	Mobile	State	0.5	No	Bus	2	Sometimes	Yes	Yes	Yes	JO	Computer Science	S	15	43	42	33	Yes	Under-7	M	AA	Moderate	Yes	Yes	48	23.8025	31.8674	710.685	41.7365	526.37
Male	20	Government	Yes	Yes	Mid	Mobile Data	4G	2024-01-03	No	Mobile	Other	0.5	Yes	Private	0	Always	Yes	Yes	No	SA	Computer Science	S	92	65	62	53	Yes	Under-7	H	CB	Moderate	Yes	Yes	55	27.6719	61.1813	624.297	66.6285	556.134
Male	23	Non Government	No	Yes	Mid	Mobile Data	4G	2024-01-03	No	Mobile	State	0.5	Yes	Private	2	Always	Yes	Yes	Yes	KW	English	S	83	75	62	53	No	Under-7	H	AA	Moderate	Yes	Yes	72	24.6027	40.1034	597.647	55.2077	951.797
Male	24	Government	No	Yes	Mid	Wifi	4G	2024-01-03	No	Mobile	State	0.5	No	Private	2	Always	Yes	Yes	Yes	LEB	Environmental Science	S	27	15	42	53	No	Above-7	L	CC	Moderate	Yes	Yes	72	18.521	63.1858	873.424	83.1359	855.637
Male	20	Non Government	Yes	Yes	Mid	Wifi	3G	2024-03-06	Yes	Computer	State	0.5	No	Private	12	Never	No	Yes	No	UAE	Computer Science	S	45	95	12	13	No	Under-7	M	BB	Low	Yes	Yes	66	25.5978	58.1575	191.415	75.3101	731.72
Male	21	Non Government	Yes	No	Poor	Mobile Data	3G	2024-01-03	Yes	Mobile	State	0.5	Yes	Bus	8	Always	No	Yes	Yes	OM	English	S	15	90	52	83	Yes	Under-7	H	BB	Moderate	Yes	Yes	73	29.4168	67.8269	412.325	65.8171	551.234
Female	24	Government	No	Yes	Mid	Mobile Data	4G	0	No	Mobile	State	0.5	No	Private	0	Always	Yes	Yes	Yes	KW	Statistics	S	45	58	52	43	Yes	Under-7	H	CC	Low	Yes	Yes	70	25.2193	46.3571	584.427	30.6443	466.535
Male	23	Non Government	No	Yes	Rich	Wifi	4G	2024-01-03	No	Mobile	State	0.5	Yes	Private	0	Always	Yes	Yes	No	UAE	Physics	S	25	5	12	33	Yes	Under-7	M	CB	Moderate	Yes	Yes	54	27.8303	56.4788	830.16	82.7877	939.256
Female	21	Non Government	No	Yes	Poor	Mobile Data	3G	2024-01-03	No	Mobile	State	0.5	No	Bus	12	Always	Yes	Yes	Yes	JO	Geology	S	22	51	42	40	Yes	Under-7	M	BB	Low	Yes	Yes	66	28.6105	48.5942	294.799	56.68	935.6
Male	20	Non Government	No	Yes	Poor	Mobile Data	4G	2024-03-06	No	Mobile	State	0.5	No	Bus	0	Always	Yes	Yes	No	SA	Physics	S	29	10	12	24	No	Above-7	L	CC	Moderate	Yes	Yes	65	20.737	55.2235	822.637	85.8947	466.417
Female	22	Non Government	No	Yes	Poor	Mobile Data	4G	2024-01-03	No	Mobile	State	0.5	No	Private	12	Sometimes	Yes	6	Yes	SA	Neuroscience	S	72	51	42	24	Yes	Above-7	H	BA	Moderate	Yes	Yes	52	20.5445	47.984	459.675	59.7323	878.33
Male	21	Government	No	No	Poor	Mobile Data	4G	0	No	Mobile	Other	0.5	No	Private	2	Always	No	Yes	Yes	JO	Materials Science	S	67	31	42	14	Yes	Under-7	M	CC	Low	Yes	Yes	67	25.3318	37.5453	270.022	71.6535	667.987
Male	23	Non Government	No	Yes	Mid	Wifi	4G	2024-03-06	No	Mobile	State	0.5	No	Private	0	Never	No	No	Yes	LEB	Biology	S	17	21	42	14	Yes	Under-7	M	BB	Moderate	Yes	Yes	64	22.9323	50.3159	783.088	34.1576	594.38
Male	24	Non Government	No	Yes	Mid	Wifi	4G	2024-03-06	Yes	Computer	State	0.75	No	Bus	2	Always	Yes	Yes	Yes	JO	Engineering	S	27	41	49	14	No	Under-7	M	CC	Moderate	Yes	Yes	71	28.0783	51.1434	181.809	74.7091	843.463
Male	18	Non Government	No	Yes	Mid	Mobile Data	4G	2024-01-03	No	Mobile	Other	1	No	Private	0	Always	Yes	No	No	KW	Astronomy	S	70	81	39	84	No	Under-7	M	BB	Moderate	Yes	Yes	72	28.8003	62.4242	563.291	50.2798	768.598
Male	22	Government	Yes	No	Rich	Wifi	4G	0	No	Mobile	State	0.5	No	Bus	12	Always	Yes	No	No	LEB	Biology	S	27	90	82	14	Yes	Under-7	H	BA	Low	Yes	Yes	83	22.2411	59.4208	157.488	51.0815	868.018
Male	20	Government	Yes	Yes	Mid	Mobile Data	4G	2024-01-03	No	Mobile	State	0.5	No	Bus	0	Always	Yes	No	No	OM	Astronomy	S	17	61	42	14	No	Under-7	M	CC	Moderate	Yes	Yes	63	20.8424	56.5517	420.776	37.1194	444.597
Male	24	Non Government	No	Yes	Mid	Mobile Data	3G	2024-01-03	No	Mobile	Other	0.5	Yes	Private	12	Always	No	No	No	KW	Environmental Science	S	87	81	42	19	Yes	Under-7	H	AA	Moderate	Yes	Yes	68	27.3663	34.5355	640.969	38.8114	591.152
Male	20	Non Government	No	Yes	Mid	Mobile Data	3G	2024-01-03	No	Mobile	State	0.75	Yes	Private	0	Always	Yes	No	Yes	LEB	Environmental Science	S	7	61	22	14	No	Above-7	L	CC	Moderate	Yes	Yes	72	21.2977	58.8247	600.504	41.1455	591.59
Male	18	Non Government	No	Yes	Mid	Mobile Data	4G	2024-01-03	No	Mobile	State	0.75	No	Bus	0	Always	Yes	No	No	KW	Neuroscience	S	17	50	2	4	No	Above-7	L	CC	Moderate	Yes	Yes	58	27.8714	50.0122	464.19	49.6924	597.852
Male	20	Non Government	No	Yes	Mid	Mobile Data	3G	2024-01-03	No	Mobile	State	0.75	No	Bus	0	Always	Yes	Yes	Yes	UAE	Materials Science	S	5	21	42	14	No	Above-7	L	DD	Moderate	Yes	Yes	58	23.0849	65.764	486.143	83.5182	701.488
Male	24	Non Government	No	Yes	Poor	Mobile Data	3G	2024-01-03	No	Mobile	Other	0.75	No	Private	0	Always	No	Yes	Yes	JO	Environmental Science	S	27	41	32	61	Yes	Above-7	M	DC	High	Yes	Yes	65	26.0106	66.7948	304.093	52.0956	569.808
Female	23	Non Government	Yes	Yes	Mid	Wifi	4G	2024-03-06	No	Computer	State	0.5	No	Bus	0	Always	No	Yes	Yes	SA	Statistics	S	87	88	40	10	Yes	Under-7	M	DC	Low	Yes	Yes	82	19.1464	32.2063	510.294	73.4618	666.63
Male	22	Non Government	No	Yes	Mid	Mobile Data	4G	2024-01-03	No	Mobile	State	0.75	No	Private	0	Always	No	Yes	Yes	SA	Statistics	S	96	61	42	94	Yes	Under-7	H	DC	Moderate	Yes	Yes	55	25.4863	62.8257	957.929	34.9649	620.667
Male	21	Non Government	Yes	Yes	Poor	Mobile Data	3G	2024-01-03	Yes	Mobile	State	0.75	No	Private	0	Always	Yes	No	No	LEB	Materials Science	S	57	51	46	34	Yes	Under-7	M	DD	Low	Yes	Yes	65	23.4212	31.5079	865.408	65.4659	841.178
Male	19	Non Government	No	Yes	Rich	Wifi	4G	2024-03-06	No	Computer	State	0.75	No	Private	0	Always	No	Yes	No	KW	Engineering	S	77	69	41	13	Yes	Under-7	M	DD	High	Yes	Yes	53	25.0393	44.6868	230.71	58.9135	762.1
Male	24	Government	No	Yes	Mid	Mobile Data	3G	2024-01-03	No	Mobile	Private	0.25	No	Private	2	Always	Yes	Yes	No	OM	Neuroscience	S	80	51	40	24	No	Under-7	M	CB	Low	Yes	Yes	63	20.0162	51.692	126.803	88.6775	792.178
Male	21	Non Government	No	Yes	Mid	Mobile Data	3G	2024-01-03	No	Mobile	Private	0.25	No	Bus	2	Sometimes	No	6	No	OM	Mathematics	S	62	61	82	40	Yes	Under-7	M	DD	Moderate	Yes	Yes	74	26.8425	35.924	940.172	80.7725	526.35
Male	21	Government	No	Yes	Mid	Wifi	3G	2024-01-03	No	Mobile	State	0.75	Yes	Private	0	Always	Yes	Yes	Yes	OM	Environmental Science	S	72	83	12	90	Yes	Under-7	H	CB	Moderate	Yes	Yes	64	28.3536	59.8526	574.075	57.2898	595.301
Male	22	Non Government	No	Yes	Mid	Wifi	4G	2024-01-03	No	Mobile	State	0.75	No	Private	0	Always	Yes	Yes	Yes	OM	Geology	S	87	81	22	70	Yes	Under-7	H	BB	Low	Yes	Yes	59	20.6009	30.3342	584.054	76.5086	412.699
Male	22	Government	No	Yes	Mid	Wifi	4G	2024-01-03	No	Mobile	State	0.5	Yes	Bus	0	Sometimes	Yes	Yes	Yes	JO	English	S	72	90	12	30	No	Under-7	M	CB	Moderate	Yes	Yes	65	19.1486	36.744	802.646	41.5823	465.025
Male	18	Non Government	Yes	Yes	Mid	Mobile Data	3G	2024-03-06	Yes	Mobile	State	0.5	Yes	Private	0	Always	No	Yes	No	KW	English	S	2	11	62	30	No	Under-7	L	BB	Moderate	Yes	Yes	71	18.2837	53.2319	383.22	63.7402	559.033
Male	22	Government	No	Yes	Mid	Wifi	4G	2024-01-03	Yes	Mobile	State	0.75	Yes	Bus	2	Always	Yes	No	Yes	UAE	English	S	5	3	2	10	Yes	Under-7	L	DD	Low	Yes	Yes	64	25.7037	58.5755	533.717	34.4771	439.278
Male	18	Non Government	Yes	Yes	Mid	Wifi	3G	2024-01-03	Yes	Mobile	Other	0.5	No	Private	12	Always	Yes	Yes	No	UAE	Neuroscience	S	73	84	77	81	Yes	Above-7	H	DD	Moderate	Yes	Yes	62	25.2851	66.6657	971.797	50.8853	761.579
Male	19	Government	Yes	Yes	Mid	Mobile Data	4G	2024-01-03	No	Mobile	Other	0.5	Yes	Bus	12	Always	No	Yes	No	JO	Engineering	S	5	17	21	10	No	Above-7	L	DD	Moderate	Yes	Yes	71	24.5604	58.2199	704.934	43.5517	998.878
Male	20	Government	No	No	Mid	Mobile Data	3G	0	No	Mobile	State	1	No	Private	2	Always	Yes	Yes	Yes	UAE	Biology	S	51	42	12	29	No	Above-7	M	CB	Low	Yes	Yes	69	20.7834	56.8712	238.371	73.1346	460.489
Male	23	Non Government	No	No	Mid	Mobile Data	3G	0	No	Mobile	State	0.75	No	Private	0	Never	No	No	Yes	OM	Engineering	S	9	7	21	20	Yes	Above-7	L	CC	Low	Yes	Yes	84	22.6909	45.7736	219.904	59.4054	892.738
Male	22	Government	Yes	Yes	Mid	Mobile Data	3G	2024-01-03	Yes	Mobile	State	0.5	No	Private	2	Always	Yes	No	No	SA	Computer Science	F	19	72	15	50	Yes	Above-7	M	DC	Moderate	Yes	Yes	64	25.1337	30.0514	283.838	75.0642	471.29
Female	22	Non Government	No	Yes	Poor	Mobile Data	4G	2024-01-03	No	Mobile	State	0.75	No	Bus	0	Always	Yes	Yes	No	OM	Astronomy	S	32	80	58	46	Yes	Above-7	M	DC	Moderate	Yes	Yes	63	23.9612	34.8064	790.041	60.9177	801.948
Male	18	Government	No	Yes	Mid	Wifi	4G	2024-01-03	No	Mobile	State	0.5	No	Private	0	Always	Yes	No	No	SA	Physics	S	32	60	58	66	Yes	Above-7	M	DC	Low	Yes	Yes	81	29.8534	51.3822	365.839	35.1891	785.895
Male	24	Non Government	No	Yes	Mid	Wifi	4G	0	No	Mobile	State	0.5	No	Bus	0	Sometimes	No	No	Yes	UAE	Engineering	S	12	8	18	26	No	Above-7	L	DC	Low	Yes	Yes	62	19.6373	57.0052	119.25	74.1221	941.63
Male	18	Government	No	No	Mid	Mobile Data	4G	0	No	Mobile	State	1	Yes	Bus	0	Always	No	Yes	Yes	OM	Computer Science	S	52	10	13	6	No	Above-7	L	DC	Moderate	Yes	Yes	72	26.3417	46.6979	949.757	79.9938	468.367
Male	18	Non Government	No	Yes	Mid	Mobile Data	3G	2024-01-03	No	Mobile	State	0.5	No	Private	0	Always	Yes	No	No	UAE	Environmental Science	S	72	80	58	66	Yes	Above-7	M	DD	Low	Yes	Yes	75	22.8518	59.2272	252.742	84.2119	589.267
Female	21	Non Government	Yes	No	Mid	Wifi	4G	2024-03-06	Yes	Computer	State	None	Yes	Bus	0	Always	No	Yes	No	JO	Engineering	S	72	80	58	66	Yes	Above-7	M	CB	Moderate	Yes	Yes	61	23.1384	50.8745	108.602	64.3195	454.468
Male	20	Government	No	Yes	Mid	Wifi	3G	2024-01-03	Yes	Mobile	State	0.5	No	Bus	0	Always	Yes	No	No	LEB	Mathematics	S	92	80	88	76	Yes	Under-7	H	DC	Moderate	Yes	Yes	68	26.6112	32.967	313.418	75.2151	644.43
Male	19	Government	Yes	No	Mid	Mobile Data	3G	2024-01-03	No	Mobile	Other	1	Yes	Bus	0	Sometimes	No	No	No	SA	Environmental Science	S	72	80	98	96	Yes	Under-7	H	CC	Moderate	Yes	Yes	67	26.3092	37.6807	311.526	75.1227	946.956
Male	22	Non Government	No	Yes	Mid	Mobile Data	3G	2024-01-03	No	Mobile	State	0.75	No	Bus	0	Sometimes	No	No	No	JO	Environmental Science	S	72	80	58	86	Yes	Under-7	M	DD	Moderate	Yes	Yes	54	29.8951	63.5999	479.805	39.345	868.914
Male	22	Non Government	No	Yes	Mid	Wifi	4G	2024-01-03	No	Mobile	State	0.75	Yes	Private	0	Always	No	No	Yes	OM	Geology	S	22	20	18	6	No	Above-7	L	DC	Moderate	Yes	Yes	71	19.5407	58.9965	928.351	39.8532	833.74
Male	18	Non Government	Yes	Yes	Poor	Mobile Data	3G	2024-01-03	Yes	Computer	State	0.75	No	Private	0	Never	No	No	No	JO	Statistics	S	12	20	38	46	No	Above-7	M	DD	Moderate	Yes	Yes	71	19.2493	65.7905	891.266	34.2531	719.817
Male	23	Government	No	No	Mid	Mobile Data	3G	0	No	Mobile	State	0.5	No	Private	0	Never	No	No	No	JO	Environmental Science	S	70	92	83	85	Yes	Under-7	H	DD	Low	Yes	Yes	66	26.6921	34.7023	511.205	49.1948	930.091
Female	22	Non Government	No	Yes	Mid	Wifi	4G	2024-03-06	No	Mobile	State	0.75	No	Private	0	Sometimes	No	Yes	Yes	KW	Geology	S	50	40	52	66	Yes	Under-7	M	DC	High	Yes	Yes	72	24.9406	69.6089	469.81	58.4105	669.665
Female	22	Non Government	No	Yes	Mid	Mobile Data	4G	2024-01-03	No	Mobile	State	0.75	No	Bus	2	Always	No	No	Yes	JO	Biology	S	80	94	62	77	Yes	Under-7	H	DD	Moderate	Yes	Yes	65	21.2899	38.3763	599.508	89.8739	489.811
Female	20	Non Government	No	No	Mid	Wifi	4G	2024-01-03	No	Mobile	State	0.5	No	Bus	0	Always	No	No	Yes	LEB	English	S	87	48	82	96	No	Above-7	M	DD	Low	Yes	Yes	77	18.953	30.4712	319.109	55.8596	902.551
Female	20	Government	No	No	Poor	Mobile Data	4G	2024-01-03	No	Mobile	Private	0.75	No	Bus	12	Always	No	Yes	Yes	KW	Astronomy	S	70	40	2	16	No	Above-7	L	DD	Low	Yes	Yes	71	19.0279	69.8969	146.966	73.5746	567.783
Male	22	Non Government	No	Yes	Mid	Wifi	4G	2024-01-03	No	Computer	State	0.5	No	Private	0	Sometimes	No	Yes	No	JO	English	S	65	86	62	40	No	Above-7	M	BB	Low	Yes	Yes	82	28.7303	41.243	945.302	71.6038	432.18
Male	24	Government	Yes	Yes	Mid	Mobile Data	3G	2024-01-03	No	Mobile	State	0.75	Yes	Private	0	Always	Yes	No	No	KW	Materials Science	S	15	6	32	40	Yes	Under-7	H	DD	Low	Yes	Yes	64	20.3024	56.7208	268.029	42.2689	475.623
Male	20	Non Government	No	No	Mid	Wifi	4G	0	No	Mobile	State	0.75	No	Private	0	Always	No	No	No	SA	Astronomy	S	19	74	32	17	No	Above-7	L	DD	Low	Yes	Yes	83	21.8805	37.0673	278.561	33.5104	765.435
Female	24	Non Government	Yes	Yes	Rich	Wifi	4G	2024-03-06	No	Mobile	State	0.75	Yes	Private	0	Always	No	Yes	Yes	JO	Biology	S	69	76	82	94	No	Under-7	M	DC	Low	Yes	Yes	63	20.7199	53.2091	525.214	62.7604	764.249
Male	22	Non Government	Yes	Yes	Poor	Wifi	4G	2024-01-03	Yes	Computer	Private	1	No	Private	2	Sometimes	Yes	Yes	No	UAE	Physics	S	39	26	12	44	No	Above-7	L	DC	High	Yes	Yes	75	22.26	66.1614	542.452	72.0183	556.11
Male	24	Government	No	Yes	Mid	Wifi	4G	0	No	Mobile	Private	0.5	No	Bus	0	Sometimes	No	Yes	No	KW	Astronomy	S	59	97	42	70	Yes	Under-7	H	DD	Low	Yes	Yes	78	18.8331	42.8072	116.591	89.8951	836.308
Male	19	Government	No	Yes	Mid	Wifi	4G	2024-01-03	No	Mobile	State	0.5	No	Private	2	Never	No	Yes	No	SA	Materials Science	S	10	17	12	40	Yes	Under-7	H	BA	Moderate	Yes	Yes	71	24.2287	56.8102	233.159	51.5167	864.184
Female	21	Government	No	Yes	Mid	Wifi	3G	2024-01-03	Yes	Mobile	Private	1	No	Private	0	Always	No	No	Yes	OM	Engineering	S	80	87	72	60	No	Under-7	H	BA	Moderate	Yes	Yes	67	18.8114	37.5161	440.339	83.7819	952.302
Female	21	Government	Yes	Yes	Mid	Wifi	4G	0	No	Computer	Other	0.5	Yes	Private	0	3	No	Yes	Yes	JO	Neuroscience	S	70	99	66	65	No	Under-7	M	BA	Low	Yes	Yes	82	27.6043	54.9918	715.358	52.9159	750.962
Female	22	Government	No	Yes	Mid	Wifi	4G	2024-01-03	No	Mobile	Other	0.5	No	Private	0	Never	No	Yes	No	UAE	Statistics	S	80	97	86	95	Yes	Under-7	M	AA	Moderate	Yes	Yes	55	20.8045	43.458	305.577	71.3647	867.654
Male	22	Non Government	No	Yes	Mid	Mobile Data	4G	2024-01-03	No	Mobile	State	1	Yes	Private	8	Always	Yes	Yes	Yes	UAE	Statistics	S	69	34	12	17	No	Above-7	L	BA	Low	Yes	Yes	63	24.4801	38.4483	480.713	65.8952	851.86
Male	22	Government	No	No	Poor	Mobile Data	4G	2024-01-03	No	Mobile	State	1	Yes	Bus	0	Always	Yes	Yes	Yes	UAE	Engineering	S	10	17	12	14	No	Above-7	L	AA	Low	Yes	Yes	78	28.5609	42.5273	601.611	33.1787	554.685
Male	23	Non Government	Yes	Yes	Mid	Wifi	4G	2024-01-03	Yes	Computer	State	1	No	Private	0	Always	Yes	Yes	Yes	OM	Materials Science	S	61	97	82	64	Yes	Above-7	M	AA	High	Yes	Yes	60	25.8105	37.1536	899.733	34.7033	586.136
Female	21	Non Government	No	Yes	Poor	Mobile Data	4G	2024-01-03	No	Mobile	Private	0.5	No	Private	0	Always	No	Yes	No	KW	Materials Science	S	21	27	52	34	Yes	Above-7	M	AA	Moderate	Yes	Yes	62	24.3955	66.0766	393.463	31.2458	687.089
Male	20	Non Government	No	Yes	Mid	Mobile Data	4G	2024-01-03	No	Mobile	State	1	No	Bus	0	Never	No	Yes	No	OM	Biology	S	49	94	42	7	No	Above-7	M	AA	Moderate	Yes	Yes	69	21.892	45.8875	220.202	52.25	411.423
Female	18	Government	Yes	Yes	Rich	Wifi	4G	2024-01-03	No	Mobile	State	0.75	No	Private	0	Always	No	No	Yes	LEB	Geology	F	70	64	42	32	No	Under-7	M	BA	High	Yes	Yes	58	21.996	39.8112	540.345	74.7481	578.439
Female	23	Non Government	Yes	Yes	Rich	Wifi	4G	2024-01-03	Yes	Computer	Private	0.5	Yes	Bus	2	Sometimes	No	No	Yes	JO	Astronomy	S	79	84	82	37	No	Under-7	H	AA	High	Yes	Yes	68	26.0338	47.9363	772.049	40.3653	684.33
Male	23	Non Government	Yes	Yes	Poor	Wifi	4G	2024-01-03	Yes	Computer	State	0.5	Yes	Bus	0	Sometimes	Yes	Yes	Yes	UAE	Environmental Science	F	19	80	12	17	Yes	Above-7	M	Fail	High	No	No	58	29.9297	42.8214	198.874	66.3512	464.842
Male	21	Non Government	No	Yes	Mid	Wifi	4G	2024-03-06	No	Tab	State	1	No	Private	0	Always	Yes	No	Yes	LEB	Neuroscience	S	11	70	32	29	Yes	Above-7	M	BA	Moderate	Yes	Yes	43	25.9421	59.7768	482.215	47.3297	475.766
Male	23	Non Government	No	No	Mid	Wifi	4G	2024-01-03	No	Mobile	Other	0.5	No	Private	12	Always	Yes	No	No	UAE	Astronomy	F	10	8	10	10	Yes	Above-7	M	AA	Low	Yes	Yes	56	24.6934	68.8488	116.007	77.8196	677.942
Male	18	Non Government	No	Yes	Mid	Mobile Data	4G	2024-01-03	No	Mobile	State	0.75	Yes	Bus	0	Always	No	No	Yes	SA	Chemistry	S	18	28	40	20	Yes	Above-7	M	BB	Moderate	Yes	Yes	53	26.7678	47.5213	130.203	77.9038	838.579
Female	21	Government	Yes	Yes	Mid	Wifi	4G	0	No	Computer	State	1	Yes	Private	0	Always	No	Yes	Yes	JO	Mathematics	F	90	84	52	30	No	Under-7	H	BA	Low	Yes	Yes	62	23.5825	64.4413	534.658	76.5249	900.249
Female	19	Government	No	No	Mid	Mobile Data	3G	2024-01-03	No	Mobile	Private	0.75	Yes	Bus	12	Sometimes	No	Yes	6	UAE	Physics	S	92	81	32	36	No	Under-7	M	BB	Low	Yes	Yes	60	18.7217	52.6345	368.378	61.49	727.788
Male	22	Non Government	Yes	Yes	Mid	Wifi	3G	2024-01-03	Yes	Mobile	State	0.75	No	Private	0	Never	No	No	No	UAE	Engineering	F	42	21	2	16	No	Under-7	M	AA	Moderate	Yes	Yes	55	24.7476	36.2894	860.597	47.074	684.849
Male	18	Government	No	Yes	Mid	Wifi	3G	2024-01-03	Yes	Computer	State	0.75	No	Bus	0	Never	No	No	No	OM	Environmental Science	S	22	20	6	26	No	Under-7	H	Fail	Moderate	No	No	74	29.4915	57.6249	641.939	78.5666	630.568
Female	23	Government	No	Yes	Mid	Wifi	4G	2024-01-03	Yes	Mobile	State	0.5	Yes	Private	0	Always	Yes	Yes	Yes	KW	Astronomy	F	95	82	82	70	Yes	Under-7	H	BB	Low	Yes	Yes	88	20.1036	50.5374	508.54	41.166	515.769
Female	20	Non Government	No	Yes	Mid	Mobile Data	3G	2024-01-03	No	Mobile	State	0.5	Yes	Private	0	Always	Yes	Yes	No	KW	Physics	S	90	62	80	60	Yes	Under-7	H	AA	Moderate	Yes	Yes	73	26.2801	56.0243	467.142	47.3856	487.937
Male	23	Non Government	No	Yes	Mid	Mobile Data	3G	2024-01-03	No	Mobile	Private	1	No	Private	0	Sometimes	No	Yes	Yes	LEB	Neuroscience	F	72	21	22	26	Yes	Under-7	H	CB	Moderate	Yes	Yes	71	20.4112	65.5875	547.521	41.0369	875.138
Male	19	Non Government	No	Yes	Mid	Wifi	4G	2024-01-03	No	Computer	Private	1	No	Private	0	Always	No	Yes	No	UAE	Chemistry	S	92	31	42	27	Yes	Under-7	H	BB	Moderate	Yes	Yes	60	24.4299	47.6174	136.395	70.4526	679.004
Male	18	Government	No	Yes	Mid	Mobile Data	3G	2024-01-03	No	Mobile	State	1	No	Bus	0	Always	Yes	Yes	Yes	OM	Mathematics	F	82	31	52	25	No	Under-7	M	BB	Low	Yes	Yes	72	19.1601	66.0471	903.514	71.1742	874.192
Male	18	Non Government	No	Yes	Mid	Wifi	4G	2024-01-03	No	Mobile	State	0.75	No	Private	0	Sometimes	No	Yes	Yes	JO	Astronomy	S	72	41	46	27	No	Under-7	M	AA	Low	Yes	Yes	67	23.4045	60.0268	998.473	69.1506	822.45
Male	22	Government	No	No	Poor	Mobile Data	4G	0	No	Mobile	State	0.5	Yes	Private	0	Never	No	No	Yes	LEB	Computer Science	F	74	71	56	37	No	Under-7	H	BA	Low	Yes	Yes	68	27.074	49.5442	263.338	54.9361	516.338
Male	21	Non Government	Yes	Yes	Mid	Mobile Data	3G	2024-03-06	Yes	Mobile	State	0.5	Yes	Bus	0	Sometimes	No	No	Yes	JO	Materials Science	S	74	60	56	37	No	Under-7	H	Fail	Moderate	No	No	74	22.1709	54.1289	208.345	36.0103	706.184
Female	23	Non Government	Yes	Yes	Mid	Wifi	4G	2024-01-03	Yes	Computer	Private	1	No	Private	0	Always	Yes	No	No	UAE	Astronomy	F	95	94	72	80	No	Under-7	H	BA	High	Yes	Yes	68	25.9789	43.0232	229.22	84.6702	666.41
Female	24	Non Government	No	Yes	Mid	Wifi	4G	2024-01-03	No	Computer	State	0.75	Yes	Bus	12	Sometimes	No	No	Yes	SA	Mathematics	S	97	87	82	86	No	Under-7	H	Fail	Low	No	No	70	27.5454	69.3439	694.924	60.4639	654.324
Male	22	Non Government	No	Yes	Poor	Mobile Data	3G	2024-01-03	No	Mobile	State	0.75	Yes	Bus	2	Sometimes	No	No	Yes	SA	Geology	F	40	38	32	36	No	Above-7	M	Fail	Low	No	No	81	29.1261	56.694	695.297	54.4183	725.543
Male	21	Government	No	No	Poor	Mobile Data	4G	2024-03-06	No	Mobile	State	0.5	Yes	Private	0	Always	No	Yes	No	JO	Astronomy	S	41	39	35	39	Yes	Above-7	M	CC	Moderate	Yes	Yes	54	20.8157	31.7539	863.132	65.3295	989.249
Female	19	Government	Yes	Yes	Poor	Mobile Data	4G	0	No	Computer	State	0.75	No	Private	0	Never	No	Yes	Yes	LEB	Physics	F	51	79	85	89	Yes	Under-7	H	CC	Low	Yes	Yes	71	22.7918	43.0649	776.644	41.5674	887.74
Female	19	Non Government	No	Yes	Mid	Mobile Data	4G	2024-01-03	No	Mobile	Private	0.75	No	Private	0	Always	Yes	No	No	JO	Physics	S	81	79	91	85	Yes	Under-7	H	AA	High	Yes	Yes	53	19.829	54.9326	504.721	37.9529	942.227
Male	24	Government	No	Yes	Mid	Mobile Data	4G	2024-01-03	No	Mobile	State	0.75	Yes	Bus	12	Sometimes	No	Yes	No	OM	Biology	F	71	70	65	69	Yes	Under-7	M	CB	Low	Yes	Yes	67	29.9098	32.2533	651.57	54.3315	417.784
Male	24	Non Government	Yes	No	Mid	Mobile Data	3G	2024-01-03	Yes	Mobile	Private	1	No	Private	12	Always	Yes	No	Yes	OM	English	S	75	71	76	80	Yes	Under-7	M	BB	Moderate	Yes	Yes	61	29.124	30.9554	719.456	43.6332	484.202
Female	20	Non Government	Yes	Yes	Mid	Wifi	4G	2024-01-03	No	Mobile	Other	0.5	Yes	Private	0	Always	Yes	Yes	No	JO	Neuroscience	F	49	36	32	44	No	Above-7	L	AA	Low	Yes	Yes	67	24.4795	48.001	561.463	44.6574	450.858
Female	23	Government	No	Yes	Mid	Mobile Data	4G	0	No	Mobile	Other	0.5	Yes	Private	0	Always	Yes	No	Yes	KW	Computer Science	S	42	24	12	24	No	Above-7	L	AA	Low	Yes	Yes	78	28.1044	43.3076	528.086	83.5507	557.939
Female	23	Non Government	No	Yes	Mid	Wifi	4G	2024-03-06	No	Tab	State	0.5	No	Private	2	Never	No	No	No	SA	Biology	F	90	86	82	74	Yes	Under-7	H	AA	Moderate	Yes	Yes	66	24.2515	47.5319	680.588	61.8456	665.135
Female	19	Non Government	No	Yes	Poor	Wifi	4G	2024-01-03	No	Mobile	Private	0.5	Yes	Bus	2	Always	No	Yes	No	UAE	Neuroscience	S	62	64	72	84	Yes	Under-7	H	AA	Low	Yes	Yes	67	25.483	40.5077	601.727	59.0081	785.232
Male	22	Non Government	No	Yes	Mid	Mobile Data	3G	2024-01-03	Yes	Mobile	Private	0.5	No	Bus	12	Always	Yes	No	Yes	UAE	Environmental Science	F	90	86	82	74	Yes	Above-7	M	AA	Moderate	Yes	Yes	77	19.0695	36.5887	679.548	71.3688	700.499
Male	20	Non Government	Yes	Yes	Mid	Mobile Data	3G	2024-03-06	Yes	Mobile	State	0.5	No	Private	2	Always	Yes	No	Yes	LEB	Geology	S	62	64	72	84	Yes	Above-7	M	BA	Moderate	Yes	Yes	85	27.0632	57.5657	651.569	87.0929	941.91
Female	20	Non Government	No	Yes	Mid	Wifi	4G	2024-01-03	No	Mobile	State	0.75	No	Private	0	Always	No	Yes	Yes	LEB	Materials Science	F	98	87	86	84	No	Under-7	H	CC	Moderate	Yes	Yes	64	19.5326	50.5828	747.277	36.7319	963.914
Female	22	Government	No	Yes	Mid	Wifi	4G	2024-01-03	No	Mobile	State	0.5	Yes	Bus	2	Sometimes	No	Yes	Yes	LEB	Engineering	S	72	74	82	89	No	Under-7	H	BA	Low	Yes	Yes	67	27.9128	38.0062	678.523	80.0121	498.113
Male	22	Non Government	No	Yes	Mid	Mobile Data	4G	2024-01-03	No	Mobile	Other	0.5	No	Bus	0	Always	No	No	No	OM	Astronomy	F	18	17	26	34	No	Above-7	M	CC	Moderate	Yes	Yes	57	27.3843	42.7836	567.768	65.0412	911.748
Male	20	Non Government	No	Yes	Poor	Mobile Data	3G	2024-01-03	No	Mobile	State	0.5	No	Bus	12	Never	No	Yes	No	JO	Engineering	S	32	14	32	29	No	Above-7	M	Fail	Low	No	No	61	26.5049	53.6723	713.617	38.7699	689.033
Male	21	Government	No	Yes	Mid	Mobile Data	4G	2024-01-03	Yes	Mobile	Private	0.5	No	Private	12	Sometimes	No	No	No	KW	Engineering	F	10	12	20	13	No	Above-7	L	BA	Moderate	Yes	Yes	58	18.4339	32.8892	504.534	47.829	671.998
Male	19	Government	No	Yes	Mid	Mobile Data	4G	2024-01-03	No	Mobile	Private	0.75	Yes	Private	8	Sometimes	No	Yes	No	OM	Chemistry	S	22	34	15	9	No	Above-7	L	Fail	Low	No	No	69	21.6375	35.8981	317.504	58.9417	870.964
Female	21	Non Government	No	Yes	Mid	Wifi	3G	2024-01-03	Yes	Mobile	Private	0.75	No	Private	0	Always	Yes	No	No	OM	Statistics	F	11	20	21	23	No	Under-7	M	Fail	High	No	No	75	21.1574	32.9298	101.276	71.4706	455.884
Female	21	Non Government	Yes	Yes	Rich	Wifi	4G	2024-03-06	No	Mobile	State	1	No	Private	0	Always	Yes	No	No	LEB	Computer Science	S	12	44	25	39	No	Under-7	M	AA	Low	Yes	Yes	84	22.3216	62.4927	603.968	44.5564	929.496
Female	18	Non Government	No	Yes	Mid	Mobile Data	3G	2024-01-03	No	Mobile	State	0.75	Yes	Private	12	Never	No	No	Yes	SA	English	F	15	50	24	43	Yes	Under-7	M	BA	Moderate	Yes	Yes	68	19.0517	60.0964	631.59	62.0927	802.518
Female	21	Non Government	No	Yes	Poor	Mobile Data	4G	2024-03-06	No	Mobile	State	0.5	No	Private	0	Always	No	Yes	No	SA	Chemistry	S	32	44	29	89	Yes	Under-7	M	BA	Moderate	Yes	Yes	54	29.2435	60.1325	974.844	71.0803	925.157
Male	20	Non Government	Yes	Yes	Rich	Wifi	4G	2024-03-06	No	Computer	State	1	No	Private	0	Always	Yes	No	No	SA	English	F	65	59	74	83	Yes	Under-7	H	AA	High	Yes	Yes	77	24.6456	58.653	425.331	56.9244	996.687
Male	19	Government	No	No	Mid	Mobile Data	4G	0	No	Mobile	State	0.5	No	Private	0	Always	Yes	No	No	SA	Materials Science	S	72	64	59	89	Yes	Under-7	H	BA	Low	Yes	Yes	75	21.6663	56.7754	454.72	81.7816	710.803
Male	23	Non Government	No	Yes	Poor	Mobile Data	3G	0	No	Mobile	State	0.75	No	Private	12	Always	Yes	No	No	KW	Mathematics	F	95	57	74	89	Yes	Above-7	M	BA	Low	Yes	Yes	67	22.7638	49.0797	281.62	82.1675	455.957
Male	20	Government	No	No	Poor	Mobile Data	4G	2024-03-06	No	Mobile	Private	0.5	No	Bus	2	Sometimes	No	No	Yes	OM	Neuroscience	S	82	84	79	79	Yes	Above-7	M	BB	Moderate	Yes	Yes	53	23.3664	55.6911	163.481	58.2415	499.914
Male	24	Government	No	Yes	Poor	Mobile Data	4G	0	No	Mobile	State	1	Yes	Bus	0	Never	No	No	Yes	SA	Neuroscience	F	25	29	34	33	No	Above-7	M	AA	Low	Yes	Yes	72	25.2071	31.5345	795.524	88.3755	594.171
Male	24	Non Government	No	Yes	Mid	Mobile Data	4G	2024-01-03	No	Mobile	State	1	No	Bus	0	Never	No	No	No	SA	Biology	S	42	34	29	39	No	Above-7	M	AA	Moderate	Yes	Yes	77	24.1882	54.8586	324.713	34.5351	462.132
Female	22	Non Government	Yes	Yes	Mid	Wifi	4G	2024-01-03	No	Mobile	State	0.5	Yes	Bus	0	Always	Yes	Yes	Yes	KW	Biology	F	55	79	44	43	Yes	Under-7	H	BB	Low	Yes	Yes	75	29.0327	61.1151	648.014	30.2017	889.205
Female	22	Government	No	No	Poor	Mobile Data	3G	2024-01-03	No	Mobile	State	0.25	Yes	Private	12	Always	Yes	Yes	No	LEB	Neuroscience	S	62	64	69	49	Yes	Under-7	H	AA	Low	Yes	Yes	80	23.9636	50.0143	718.996	52.8401	578.121
Female	21	Non Government	Yes	Yes	Poor	Wifi	3G	2024-03-06	No	Computer	State	0.5	No	Private	2	Always	Yes	No	Yes	LEB	Astronomy	F	78	88	74	83	Yes	Under-7	H	BA	Moderate	Yes	Yes	62	29.9059	44.3005	524.113	66.0658	985.532
Female	24	Non Government	No	Yes	Mid	Mobile Data	4G	2024-01-03	No	Mobile	State	0.5	No	Bus	0	Always	No	Yes	No	UAE	Computer Science	S	72	84	89	89	Yes	Under-7	H	BB	Moderate	Yes	Yes	73	28.2171	41.0971	888.717	67.752	821.555
Male	21	Non Government	No	Yes	Poor	Mobile Data	4G	2024-01-03	Yes	Mobile	State	0.5	No	Bus	0	Always	Yes	Yes	No	UAE	Geology	F	60	92	83	23	Yes	Under-7	H	AA	High	Yes	Yes	71	20.5021	55.7121	499.415	58.5867	504.058
Male	19	Non Government	Yes	No	Mid	Mobile Data	3G	2024-03-06	Yes	Mobile	Private	0.5	Yes	Private	0	Always	Yes	Yes	Yes	LEB	Statistics	S	50	90	83	13	Yes	Under-7	H	AA	High	Yes	Yes	92	29.1671	57.712	356.418	37.493	685.626
Female	19	Non Government	No	Yes	Poor	Mobile Data	4G	2024-01-03	Yes	Mobile	State	0.5	No	Bus	0	Never	No	No	No	JO	English	F	60	97	13	3	Yes	Under-7	H	BB	High	Yes	Yes	72	19.3964	64.8387	906.414	40.2299	680.131
Female	22	Non Government	No	Yes	Rich	Wifi	3G	2024-01-03	No	Mobile	Other	0.75	No	Private	0	Never	No	No	Yes	JO	English	S	50	95	23	10	Yes	Under-7	H	CC	High	Yes	Yes	61	27.8094	43.6934	875.408	81.1289	695.507
Female	21	Non Government	Yes	No	Mid	Mobile Data	3G	2024-01-03	Yes	Computer	State	1	Yes	Bus	0	Always	No	Yes	Yes	UAE	Computer Science	F	60	87	23	11	Yes	Above-7	M	CC	Moderate	Yes	Yes	63	22.5675	60.7909	247.636	82.0747	721.415
Female	20	Government	No	No	Poor	Mobile Data	3G	2024-01-03	Yes	Mobile	State	0.5	Yes	Private	0	Always	No	Yes	No	JO	Neuroscience	S	50	80	20	15	Yes	Above-7	M	BB	Low	Yes	Yes	77	28.5357	52.4542	123.365	70.4339	418.704
Male	22	Government	No	No	Poor	Mobile Data	3G	0	No	Mobile	State	0.5	No	Private	2	Always	Yes	No	No	LEB	Computer Science	F	10	15	10	21	No	Above-7	L	AA	Low	Yes	Yes	72	28.4167	65.3135	180.987	69.8531	811.781
Male	18	Government	No	Yes	Mid	Wifi	4G	2024-01-03	No	Mobile	State	0.5	Yes	Bus	0	Always	Yes	Yes	No	KW	Environmental Science	S	30	10	20	5	No	Above-7	L	BA	Moderate	Yes	Yes	58	27.6711	51.1125	357.893	65.8609	692.315
Male	22	Non Government	Yes	Yes	Mid	Wifi	3G	2024-01-03	Yes	Mobile	Private	0.5	No	Bus	2	Always	Yes	No	Yes	OM	Engineering	F	24	35	18	31	No	Under-7	M	BA	Low	Yes	Yes	68	27.4804	50.7052	975.034	42.1756	874.579
Male	24	Non Government	Yes	No	Poor	Mobile Data	3G	2024-01-03	Yes	Mobile	Private	0.75	No	Private	12	Always	Yes	Yes	No	JO	Astronomy	S	27	20	33	35	No	Under-7	M	AA	Moderate	Yes	Yes	65	21.6561	53.1151	602.665	55.695	889.21
Male	18	Government	No	Yes	Mid	Mobile Data	3G	2024-01-03	Yes	Mobile	Other	0.75	Yes	Bus	12	Always	Yes	Yes	Yes	UAE	Mathematics	F	10	15	10	21	No	Above-7	L	BA	Low	Yes	Yes	62	18.971	59.9726	435.936	71.7537	538.321
Male	19	Government	No	No	Poor	Mobile Data	3G	0	No	Mobile	State	0.5	Yes	Bus	2	Sometimes	No	No	Yes	SA	English	S	30	10	20	5	No	Above-7	L	AA	Low	Yes	Yes	82	22.8358	68.5876	899.844	62.2351	429.054
Female	23	Non Government	No	No	Mid	Wifi	4G	0	No	Mobile	State	1	No	Private	0	Always	Yes	No	Yes	SA	Biology	F	80	77	63	83	Yes	Under-7	M	BA	Moderate	Yes	Yes	70	20.0823	32.9425	507.823	31.1148	821.94
Female	24	Non Government	No	No	Mid	Mobile Data	3G	2024-01-03	No	Mobile	State	0.5	No	Bus	0	Always	No	Yes	Yes	KW	Statistics	S	75	85	73	80	Yes	Under-7	M	AA	Moderate	Yes	Yes	68	26.3394	32.1374	383.715	87.2134	986.658
Male	23	Non Government	No	Yes	Mid	Wifi	4G	2024-01-03	No	Mobile	Private	0.5	No	Private	2	Always	Yes	No	Yes	KW	Physics	F	40	7	50	41	No	Above-7	L	AA	Low	Yes	Yes	52	22.1532	67.502	947.098	80.689	667.995
Male	23	Non Government	No	Yes	Poor	Mobile Data	4G	2024-01-03	Yes	Mobile	State	0.5	Yes	Private	2	Always	No	Yes	No	UAE	Computer Science	S	35	2	29	33	No	Above-7	L	AA	High	Yes	Yes	58	29.7073	51.195	864.566	45.6327	555.768
Female	21	Non Government	No	Yes	Mid	Mobile Data	4G	2024-01-03	No	Mobile	State	0.5	No	Private	0	Never	No	Yes	No	KW	Environmental Science	F	10	90	30	21	No	Under-7	M	AA	Moderate	Yes	Yes	63	25.6917	54.5961	859.302	66.9875	494.003
Female	22	Non Government	No	Yes	Mid	Mobile Data	3G	2024-01-03	No	Mobile	State	0.5	No	Bus	0	Always	Yes	No	Yes	LEB	Engineering	S	25	80	29	23	No	Under-7	M	CB	Low	Yes	Yes	76	27.8698	49.2969	561.056	85.3944	572.467
Male	21	Non Government	No	Yes	Mid	Wifi	4G	2024-01-03	Yes	Mobile	Other	0.5	No	Bus	0	Always	Yes	Yes	Yes	UAE	Materials Science	F	10	8	9	3	No	Above-7	L	AA	Moderate	Yes	Yes	80	19.5903	33.7463	810.495	35.7607	596.752
Male	21	Government	No	Yes	Mid	Wifi	3G	2024-01-03	No	Mobile	State	0.5	No	Bus	8	Always	Yes	No	Yes	JO	Environmental Science	S	15	7	12	7	No	Above-7	L	BB	Moderate	Yes	Yes	74	28.3442	60.7236	261.418	60.1818	654.325
Female	20	Government	No	No	Mid	Mobile Data	4G	2024-01-03	No	Mobile	State	0.5	No	Bus	0	Always	Yes	Yes	No	OM	Physics	F	70	90	20	21	No	Under-7	M	CC	Low	Yes	Yes	53	29.0731	59.889	615.901	57.3746	793.244
Female	19	Non Government	No	Yes	Poor	Mobile Data	3G	2024-01-03	No	Mobile	State	0.5	No	Bus	0	Always	No	Yes	Yes	LEB	Physics	S	75	80	15	20	No	Under-7	M	BB	Low	Yes	Yes	60	23.8447	42.4681	985.461	54.6123	563.898
Female	19	Government	No	Yes	Mid	Mobile Data	4G	2024-01-03	No	Mobile	State	0.5	No	Bus	0	Always	No	No	Yes	JO	Mathematics	F	78	98	10	11	No	Under-7	M	AA	Low	Yes	Yes	55	25.275	42.2496	361.863	80.1353	430.586
Female	21	Government	Yes	Yes	Mid	Mobile Data	4G	2024-01-03	No	Mobile	Private	0.75	No	Private	2	Never	Yes	No	Yes	KW	Statistics	S	79	89	11	14	No	Under-7	M	BA	Moderate	Yes	Yes	63	27.1777	63.5137	814.917	52.8388	623.967
Female	18	Government	No	No	Mid	Wifi	4G	2024-01-03	No	Mobile	State	0.5	No	Bus	2	Sometimes	Yes	Yes	Yes	JO	Physics	F	16	90	15	11	No	Under-7	M	AA	Moderate	Yes	Yes	60	20.0981	32.8943	541.431	33.8198	913.378
Female	21	Non Government	No	Yes	Mid	Wifi	4G	2024-03-06	No	Computer	Other	0.5	Yes	Private	0	Always	Yes	Yes	No	JO	Biology	S	17	80	13	10	No	Under-7	M	CB	Moderate	Yes	Yes	73	24.0308	65.2442	135.825	33.9503	699.011
Male	22	Non Government	Yes	Yes	Mid	Mobile Data	3G	2024-01-03	Yes	Computer	State	0.5	Yes	Private	2	Always	Yes	Yes	Yes	JO	Physics	F	40	87	50	41	No	Under-7	M	AA	Moderate	Yes	Yes	82	22.784	40.2665	786.717	32.5647	978.87
Male	18	Non Government	Yes	Yes	Mid	Wifi	4G	2024-01-03	No	Mobile	State	0.5	No	Private	2	Always	Yes	Yes	Yes	LEB	Mathematics	S	35	92	29	33	No	Under-7	M	CC	Low	Yes	Yes	66	19.7565	53.7194	251.712	54.5487	702.173
Female	22	Non Government	No	Yes	Poor	Wifi	3G	2024-01-03	No	Mobile	State	0.5	No	Private	12	Never	No	Yes	No	JO	Chemistry	F	14	97	15	14	No	Under-7	H	BB	Moderate	Yes	Yes	55	22.4104	67.4398	668.326	73.1044	565.539
Female	21	Non Government	Yes	Yes	Poor	Wifi	4G	2024-01-03	Yes	Computer	State	0.5	Yes	Bus	8	Always	No	Yes	Yes	UAE	Materials Science	F	13	82	20	30	No	Under-7	H	BB	High	Yes	Yes	72	18.8181	57.1249	177.098	42.2233	515.988
Female	24	Non Government	No	Yes	Mid	Mobile Data	3G	2024-01-03	No	Mobile	State	0.5	No	Private	0	Always	Yes	Yes	Yes	KW	Astronomy	S	24	97	15	14	No	Under-7	H	CC	Moderate	Yes	Yes	75	18.3097	46.5772	952.181	68.7881	816.715
Female	21	Government	No	Yes	Poor	Mobile Data	3G	2024-01-03	No	Mobile	State	0.5	Yes	Private	0	Always	Yes	Yes	No	JO	Mathematics	S	23	82	20	30	No	Under-7	H	CB	Low	Yes	Yes	60	19.622	57.5814	362.551	71.2253	721.829
Male	18	Non Government	Yes	Yes	Rich	Wifi	4G	2024-03-06	No	Computer	State	0.5	No	Bus	12	Always	Yes	Yes	Yes	SA	Chemistry	F	20	3	9	3	No	Above-7	L	BB	High	Yes	Yes	78	29.5574	43.7592	303.818	45.3121	762.399
Male	22	Government	No	Yes	Mid	Mobile Data	4G	0	No	Mobile	State	0.5	No	Bus	0	Always	Yes	Yes	No	KW	Mathematics	S	15	4	12	7	No	Above-7	L	CC	Low	Yes	Yes	68	24.5944	41.0903	216.223	66.0335	853.076
Male	18	Non Government	No	No	Mid	Wifi	4G	2024-01-03	No	Mobile	State	0.5	No	Private	12	Sometimes	Yes	6	Yes	LEB	Geology	F	5	13	6	6	No	Above-7	L	BA	Low	Yes	Yes	72	29.5899	69.8673	951.402	71.0921	835.542
Male	21	Government	No	No	Mid	Mobile Data	3G	0	No	Mobile	Other	0.5	No	Private	2	Always	No	Yes	Yes	SA	Statistics	S	7	9	11	10	No	Above-7	L	CC	Low	Yes	Yes	67	23.19	60.0316	740.713	57.9968	426.018
Female	22	Non Government	Yes	Yes	Mid	Wifi	3G	2024-01-03	Yes	Mobile	State	0.5	No	Private	0	Never	No	No	Yes	JO	Geology	F	10	94	40	11	Yes	Under-7	M	BB	Moderate	Yes	Yes	43	21.7418	55.7888	767.495	50.203	881.543
Female	23	Non Government	Yes	Yes	Mid	Wifi	4G	2024-01-03	No	Computer	State	0.75	No	Bus	2	Always	Yes	Yes	Yes	JO	Materials Science	S	25	89	21	13	Yes	Under-7	M	CC	Moderate	Yes	Yes	72	24.0737	44.2116	549.464	67.1491	719.622
Male	21	Non Government	Yes	No	Mid	Wifi	4G	2024-03-06	Yes	Computer	Other	1	No	Private	0	Always	Yes	No	No	LEB	Engineering	F	30	98	42	21	Yes	Under-7	H	BB	Moderate	Yes	Yes	74	23.2741	31.9664	527.255	88.6708	635.025
Male	19	Non Government	No	No	Mid	Wifi	4G	2024-01-03	No	Mobile	State	0.5	No	Bus	12	Always	Yes	No	No	LEB	Astronomy	S	35	97	41	23	Yes	Under-7	H	BA	Low	Yes	Yes	72	19.268	31.2423	199.019	55.6105	722.512
Male	19	Non Government	No	Yes	Mid	Wifi	4G	2024-01-03	No	Mobile	State	0.5	No	Bus	0	Always	Yes	No	No	UAE	Biology	F	32	88	32	25	Yes	Under-7	M	CC	Low	Yes	Yes	54	25.6899	52.1673	603.857	53.5041	767.471
Male	22	Non Government	No	Yes	Mid	Wifi	4G	2024-01-03	No	Mobile	Other	0.5	Yes	Private	12	Always	No	No	No	UAE	Neuroscience	S	25	87	21	27	Yes	Under-7	M	AA	Low	Yes	Yes	60	20.5925	60.4813	322.225	57.856	489.704
Female	22	Non Government	Yes	Yes	Mid	Wifi	3G	2024-03-06	Yes	Computer	State	0.75	Yes	Private	0	Always	Yes	No	Yes	SA	Astronomy	F	72	98	52	15	Yes	Under-7	H	CC	Low	Yes	Yes	72	25.4351	51.4952	979.431	34.5731	650.449
Female	20	Government	No	No	Poor	Mobile Data	4G	0	No	Mobile	State	0.75	No	Bus	0	Always	Yes	No	No	OM	Environmental Science	S	75	90	51	17	Yes	Under-7	H	CC	Low	Yes	Yes	74	25.8024	63.6314	816.923	63.1898	601.352
Male	21	Government	No	No	Poor	Mobile Data	2G	2024-01-03	No	Mobile	State	0.75	No	Bus	0	Always	Yes	Yes	Yes	SA	Computer Science	F	20	88	31	28	Yes	Above-7	M	DD	Low	Yes	Yes	60	19.8243	31.3371	471.693	49.7218	610.245
Male	18	Non Government	No	Yes	Rich	Wifi	4G	2024-01-03	No	Mobile	Other	0.75	No	Private	0	Always	No	Yes	Yes	UAE	Physics	S	10	98	41	38	Yes	Above-7	M	DC	High	Yes	Yes	71	18.7362	44.6701	236.207	37.2853	454.801
Male	20	Government	No	No	Mid	Mobile Data	4G	0	No	Mobile	State	0.5	No	Bus	0	Always	No	Yes	Yes	JO	Astronomy	F	90	98	41	38	Yes	Under-7	H	DC	Moderate	Yes	Yes	80	27.3691	39.4828	806.799	57.9754	495.906
Male	21	Non Government	No	No	Mid	Wifi	4G	2024-01-03	No	Mobile	State	0.75	No	Private	0	Always	No	Yes	Yes	JO	Engineering	S	80	88	51	39	Yes	Under-7	H	DC	Low	Yes	Yes	53	23.5176	47.8909	209.848	30.203	497.099
Male	23	Non Government	No	Yes	Mid	Mobile Data	4G	2024-01-03	No	Mobile	State	0.75	No	Private	0	Always	Yes	No	No	OM	Astronomy	F	80	95	21	28	Yes	Under-7	H	DD	Moderate	Yes	Yes	72	18.698	32.8951	270.4	54.1071	623.935
Male	23	Non Government	No	Yes	Mid	Wifi	4G	2024-01-03	No	Mobile	State	0.75	No	Private	0	Always	No	Yes	No	JO	Physics	S	78	70	31	29	Yes	Under-7	H	DD	Low	Yes	Yes	90	29.9384	68.1653	290.368	36.3441	936.695
Male	24	Non Government	No	Yes	Mid	Wifi	4G	2024-03-06	No	Tab	Private	0.25	No	Private	2	Always	Yes	Yes	No	SA	Computer Science	F	10	18	71	38	Yes	Above-7	M	CB	Moderate	Yes	Yes	75	18.6934	38.9302	601.202	31.4576	523.616
Male	19	Non Government	No	Yes	Mid	Wifi	4G	2024-01-03	No	Mobile	Private	0.25	No	Bus	2	Sometimes	No	6	No	LEB	English	S	10	58	51	48	Yes	Above-7	M	DD	Low	Yes	Yes	67	26.3404	66.8923	808.351	79.4685	649.716
Female	21	Non Government	No	Yes	Mid	Mobile Data	4G	2024-01-03	No	Mobile	State	0.75	Yes	Private	0	Always	Yes	Yes	Yes	JO	Geology	F	98	88	60	31	No	Under-7	H	CB	Moderate	Yes	Yes	58	29.8041	47.0357	382.883	84.9749	586.966
Female	21	Government	No	No	Poor	Mobile Data	2G	2024-01-03	No	Mobile	State	0.75	No	Private	0	Always	Yes	Yes	Yes	UAE	Astronomy	S	75	81	51	34	No	Under-7	H	BB	Low	Yes	Yes	74	20.8702	69.421	176.203	42.4605	872.43
Male	20	Non Government	No	No	Mid	Mobile Data	3G	2024-01-03	No	Mobile	State	0.5	Yes	Bus	0	Sometimes	Yes	Yes	Yes	UAE	Neuroscience	F	10	17	50	21	No	Under-7	M	CB	Moderate	Yes	Yes	63	19.707	52.1623	518.085	62.3579	430.076
Male	18	Government	No	Yes	Mid	Mobile Data	4G	0	No	Mobile	State	0.5	Yes	Private	0	Always	No	Yes	No	UAE	Statistics	S	35	2	29	23	No	Under-7	M	BB	Low	Yes	Yes	62	19.4566	67.2333	773.299	46.6775	517.926
Female	24	Non Government	Yes	Yes	Rich	Wifi	4G	2024-01-03	Yes	Computer	State	0.75	Yes	Bus	2	Always	Yes	No	Yes	KW	Astronomy	F	10	20	22	97	No	Above-7	L	DD	High	Yes	Yes	77	21.6393	30.214	299.497	59.6146	526.385
Female	19	Non Government	Yes	Yes	Mid	Wifi	4G	2024-01-03	No	Mobile	Other	0.5	No	Private	12	Always	Yes	Yes	No	LEB	Geology	S	5	9	19	98	No	Above-7	L	DD	Low	Yes	Yes	64	19.2125	59.9296	297.932	56.1979	995.778
Male	22	Government	No	No	Mid	Mobile Data	4G	2024-01-03	No	Mobile	Other	0.5	Yes	Bus	12	Always	No	Yes	No	LEB	Computer Science	F	10	10	40	51	No	Above-7	L	DD	Moderate	Yes	Yes	70	26.3059	66.122	952.504	46.1431	742.465
Male	23	Government	No	Yes	Mid	Mobile Data	3G	2024-01-03	No	Mobile	State	1	No	Private	2	Always	Yes	Yes	Yes	KW	English	S	35	2	29	23	No	Above-7	L	CB	Low	Yes	Yes	72	18.7475	35.5888	958.738	72.0236	483.375
Male	19	Non Government	No	Yes	Poor	Mobile Data	3G	2024-01-03	No	Mobile	State	0.75	No	Private	0	Never	No	No	Yes	OM	English	F	20	90	50	61	Yes	Above-7	M	CC	Low	Yes	Yes	52	24.1131	33.845	991.419	37.5895	563.319
Male	20	Government	No	No	Mid	Mobile Data	3G	0	No	Mobile	State	0.5	No	Private	2	Always	Yes	No	No	KW	Mathematics	S	32	82	59	63	Yes	Above-7	M	DC	Low	Yes	Yes	71	29.9604	46.9829	826.894	33.1844	500.693
Male	20	Non Government	Yes	Yes	Mid	Wifi	3G	2024-03-06	Yes	Mobile	State	0.75	No	Bus	0	Always	Yes	Yes	No	LEB	Neuroscience	F	10	30	50	91	Yes	Above-7	L	DC	Moderate	Yes	Yes	78	27.7676	67.3472	269.366	76.0605	474.763
Male	22	Non Government	No	Yes	Mid	Mobile Data	4G	2024-01-03	No	Mobile	State	0.5	No	Private	0	Always	Yes	No	No	SA	Geology	S	12	22	59	83	Yes	Above-7	L	DC	Low	Yes	Yes	72	25.3826	51.6955	290.783	69.9558	878.309
Female	18	Non Government	No	Yes	Mid	Wifi	4G	2024-03-06	No	Tab	State	0.5	No	Bus	0	Sometimes	No	No	Yes	KW	Chemistry	F	11	20	20	98	No	Above-7	L	DC	Moderate	Yes	Yes	70	21.675	51.0983	406.203	59.9116	697.452
Female	18	Non Government	Yes	Yes	Mid	Mobile Data	3G	2024-03-06	Yes	Mobile	State	1	Yes	Bus	0	Always	No	Yes	Yes	KW	Mathematics	S	10	12	29	93	No	Above-7	L	DC	Moderate	Yes	Yes	74	25.4868	35.645	386.319	58.0674	778.726
Male	22	Non Government	Yes	Yes	Mid	Wifi	4G	2024-01-03	No	Computer	State	0.5	No	Private	0	Always	Yes	No	No	KW	Statistics	F	69	82	20	28	Yes	Under-7	H	DD	Moderate	Yes	Yes	54	24.3245	30.0316	960.875	59.8447	598.751
Male	22	Government	No	Yes	Mid	Wifi	4G	2024-03-06	No	Mobile	State	None	Yes	Bus	0	Always	No	Yes	No	LEB	Engineering	S	70	83	29	33	Yes	Under-7	H	CB	Moderate	Yes	Yes	59	23.113	62.4056	810.167	56.2214	732.217
Female	18	Non Government	No	Yes	Poor	Mobile Data	3G	2024-01-03	No	Mobile	State	0.5	No	Bus	0	Always	Yes	No	No	OM	Biology	F	89	92	40	28	Yes	Under-7	H	DC	Moderate	Yes	Yes	92	19.5685	33.503	751.608	53.5735	554.541
Female	23	Non Government	No	Yes	Mid	Wifi	4G	2024-03-06	No	Mobile	Other	1	Yes	Bus	0	Sometimes	No	No	No	OM	Physics	S	79	93	49	23	Yes	Under-7	H	CC	Moderate	Yes	Yes	75	28.6393	55.354	267.367	59.9814	584.822
Male	18	Government	No	No	Mid	Mobile Data	4G	2024-01-03	No	Mobile	State	0.75	No	Bus	0	Sometimes	No	No	No	OM	Engineering	F	15	90	21	97	Yes	Under-7	M	DD	Low	Yes	Yes	81	23.3974	66.5847	918.573	61.7109	791.343
Male	22	Government	No	Yes	Mid	Mobile Data	4G	0	No	Mobile	State	0.75	Yes	Private	0	Always	No	No	Yes	SA	Chemistry	S	20	77	31	88	Yes	Under-7	M	DC	Low	Yes	Yes	60	20.3355	38.3461	845.083	71.5141	490.21
Male	19	Non Government	No	Yes	Poor	Mobile Data	3G	2024-01-03	No	Mobile	State	0.75	No	Private	0	Never	No	No	No	SA	Computer Science	F	4	10	11	7	No	Above-7	L	DD	Moderate	Yes	Yes	63	22.4131	56.6109	247.278	72.6724	770.333
Male	18	Government	No	Yes	Mid	Wifi	4G	2024-01-03	No	Mobile	State	0.5	No	Private	0	Never	No	No	No	OM	Astronomy	S	5	0	1	8	No	Above-7	L	DD	Moderate	Yes	Yes	69	22.9696	33.1479	884.053	52.6577	911.341
Female	19	Government	No	Yes	Mid	Wifi	3G	2024-01-03	Yes	Computer	State	0.75	No	Private	0	Sometimes	No	Yes	Yes	KW	Engineering	F	88	81	50	10	Yes	Above-7	M	DC	Moderate	Yes	Yes	62	27.9305	54.1502	345.023	54.8124	472.254
Female	23	Non Government	No	Yes	Mid	Mobile Data	4G	2024-01-03	No	Mobile	State	0.75	No	Bus	2	Always	No	No	Yes	OM	Chemistry	S	90	88	54	12	Yes	Above-7	M	DD	Moderate	Yes	Yes	58	26.8034	36.5573	172.783	52.4218	938.477
Female	19	Non Government	No	Yes	Poor	Mobile Data	3G	2024-01-03	No	Mobile	State	0.5	No	Bus	0	Always	No	No	Yes	OM	Materials Science	F	86	98	50	20	Yes	Under-7	H	DD	Low	Yes	Yes	74	27.2317	59.4381	691.14	62.1921	447.667
Female	20	Non Government	No	Yes	Mid	Wifi	4G	0	No	Mobile	Private	0.75	No	Bus	12	Always	No	Yes	Yes	LEB	Engineering	S	90	90	57	22	Yes	Under-7	H	DD	Low	Yes	Yes	67	18.1324	42.0493	688.424	57.2012	609.346
Male	24	Non Government	No	Yes	Mid	Mobile Data	4G	2024-01-03	No	Mobile	State	0.5	No	Private	0	Sometimes	No	Yes	No	UAE	Biology	F	78	91	50	40	Yes	Under-7	H	BB	Moderate	Yes	Yes	80	22.9938	48.5356	185.439	83.3758	766.306
Male	23	Government	No	Yes	Mid	Wifi	4G	2024-01-03	No	Mobile	State	0.75	Yes	Private	0	Always	Yes	No	No	UAE	Biology	S	70	98	54	72	Yes	Under-7	H	DD	Moderate	Yes	Yes	95	23.7761	53.9772	386.967	71.7817	735.649
Male	22	Non Government	No	Yes	Mid	Mobile Data	4G	2024-01-03	No	Mobile	State	0.75	No	Private	0	Always	No	No	No	UAE	Physics	F	80	80	46	61	Yes	Under-7	M	DD	Moderate	Yes	Yes	64	18.2303	36.8509	993.533	83.9194	457.835
Male	22	Non Government	No	Yes	Mid	Mobile Data	4G	2024-01-03	No	Mobile	State	0.75	Yes	Private	0	Always	No	Yes	Yes	UAE	Physics	S	85	82	59	63	Yes	Under-7	M	DC	Moderate	Yes	Yes	82	21.1178	59.6655	710.584	72.5482	879.348
Male	20	Non Government	No	Yes	Mid	Wifi	4G	2024-01-03	No	Mobile	Private	1	No	Private	2	Sometimes	Yes	Yes	No	UAE	English	F	88	90	86	81	Yes	Under-7	H	DC	Moderate	Yes	Yes	65	27.1235	42.1056	757.068	88.2595	983.892
Male	21	Non Government	No	Yes	Mid	Mobile Data	4G	2024-01-03	No	Mobile	Private	0.5	No	Bus	0	Sometimes	No	Yes	No	JO	English	S	89	92	89	83	Yes	Under-7	H	DD	Moderate	Yes	Yes	84	19.6453	56.4949	291.626	68.1442	508.737
Male	23	Non Government	No	Yes	Mid	Mobile Data	4G	2024-01-03	No	Mobile	State	0.5	No	Private	2	Never	No	Yes	No	JO	Astronomy	F	39	71	40	26	No	Above-7	M	BA	Moderate	Yes	Yes	82	24.4237	36.3313	170.904	87.813	937.079
Male	20	Non Government	No	Yes	Poor	Mobile Data	3G	2024-01-03	No	Mobile	Private	1	No	Private	0	Always	No	No	Yes	SA	Biology	S	35	80	34	22	No	Above-7	M	BA	High	Yes	Yes	75	20.5824	57.5247	349.212	39.4902	734.086
Male	20	Government	No	Yes	Mid	Wifi	4G	2024-01-03	No	Mobile	Other	0.5	Yes	Private	0	3	No	Yes	Yes	JO	Statistics	F	76	81	80	86	No	Under-7	H	BA	Moderate	Yes	Yes	75	18.1454	35.1275	324.009	33.1487	961.56
Male	20	Non Government	No	Yes	Mid	Wifi	4G	2024-01-03	No	Mobile	Other	0.5	No	Private	0	Never	No	Yes	No	SA	Neuroscience	S	65	89	64	82	No	Under-7	H	AA	Low	Yes	Yes	66	20.8944	47.0143	311.09	64.7475	505.652
Female	18	Non Government	Yes	Yes	Poor	Mobile Data	3G	2024-01-03	Yes	Computer	State	1	Yes	Private	8	Always	Yes	Yes	Yes	LEB	Materials Science	F	96	95	70	70	Yes	Under-7	H	BA	Moderate	Yes	Yes	68	29.7105	39.8882	273.479	89.0096	875.213
Female	18	Non Government	Yes	Yes	Mid	Mobile Data	3G	2024-03-06	Yes	Mobile	State	1	Yes	Bus	0	Always	Yes	Yes	Yes	SA	Astronomy	S	80	91	87	72	Yes	Under-7	H	AA	Moderate	Yes	Yes	70	27.6184	59.935	617.28	55.0563	435.869
Male	20	Government	No	No	Mid	Mobile Data	4G	2024-01-03	No	Mobile	State	1	No	Private	0	Always	Yes	Yes	Yes	KW	Statistics	F	2	9	10	1	No	Above-7	L	AA	Low	Yes	Yes	67	29.5149	40.4814	395.293	42.7226	929.918
Male	22	Non Government	No	Yes	Mid	Wifi	4G	2024-01-03	No	Mobile	Private	0.5	No	Private	0	Always	No	Yes	No	OM	Engineering	S	3	8	19	3	No	Above-7	L	AA	Moderate	Yes	Yes	62	23.8542	65.2687	838.311	61.2925	804.496
Male	24	Non Government	No	Yes	Mid	Mobile Data	4G	2024-01-03	No	Mobile	State	1	No	Bus	0	Never	No	Yes	No	OM	Mathematics	F	50	79	10	31	No	Under-7	M	AA	Moderate	Yes	Yes	68	19.3168	65.6728	265.553	68.9279	622.153
Male	18	Non Government	Yes	No	Mid	Mobile Data	3G	2024-01-03	Yes	Computer	State	0.75	No	Private	0	Always	No	No	Yes	LEB	Computer Science	S	53	88	9	33	No	Under-7	M	BA	Moderate	Yes	Yes	71	24.5755	37.8577	518.164	48.9107	514.28
Female	21	Non Government	Yes	Yes	Mid	Mobile Data	3G	2024-01-03	No	Mobile	Private	0.5	Yes	Bus	2	Sometimes	No	No	Yes	OM	Engineering	F	70	89	12	21	No	Under-7	H	AA	Moderate	Yes	Yes	54	23.4525	54.5538	112.292	72.8862	889.92
Female	24	Government	No	No	Poor	Mobile Data	4G	2024-01-03	No	Mobile	State	0.5	Yes	Bus	0	Sometimes	Yes	Yes	Yes	JO	Geology	S	59	90	19	43	No	Under-7	H	Fail	Low	No	No	70	28.1323	33.5087	533.514	88.5069	761.945
Male	21	Non Government	No	Yes	Mid	Wifi	2G	2024-03-06	No	Mobile	State	1	No	Private	0	Always	Yes	No	Yes	LEB	Physics	F	78	80	66	51	Yes	Under-7	M	BA	Moderate	Yes	Yes	68	19.177	45.6615	150.254	83.8178	616.25
Male	20	Government	No	No	Mid	Mobile Data	3G	0	No	Mobile	Other	0.5	No	Private	12	Always	Yes	No	No	LEB	Environmental Science	S	79	72	79	83	Yes	Under-7	M	AA	Low	Yes	Yes	48	23.8589	58.5329	979.951	47.4951	666.301
Female	19	Non Government	No	Yes	Mid	Mobile Data	4G	2024-01-03	No	Mobile	State	0.75	Yes	Bus	0	Always	No	No	Yes	OM	Chemistry	F	10	9	2	1	No	Above-7	L	BB	Moderate	Yes	Yes	48	19.8006	56.3769	811.533	49.6034	895.926
Female	23	Non Government	No	Yes	Rich	Wifi	4G	2024-03-06	No	Mobile	State	1	Yes	Private	0	Always	No	Yes	Yes	KW	Physics	S	9	7	9	3	No	Above-7	L	BA	High	Yes	Yes	61	21.8961	54.988	541.1	52.2925	603.356
Male	19	Non Government	No	Yes	Mid	Wifi	4G	2024-01-03	No	Mobile	Private	0.75	Yes	Bus	12	Sometimes	No	Yes	6	SA	Mathematics	F	98	90	86	71	Yes	Under-7	H	BB	Moderate	Yes	Yes	68	26.8483	41.3016	177.929	53.6732	453.78
Male	18	Non Government	No	Yes	Mid	Mobile Data	4G	2024-01-03	No	Mobile	State	0.75	No	Private	0	Never	No	No	No	KW	Materials Science	S	89	92	89	83	Yes	Under-7	H	AA	Moderate	Yes	Yes	85	23.7122	45.121	633.201	36.0192	946.769
Male	24	Government	No	No	Poor	Mobile Data	3G	2024-01-03	No	Mobile	State	0.75	No	Bus	0	Never	No	No	No	UAE	Statistics	F	88	90	76	81	Yes	Under-7	H	Fail	Low	No	No	69	22.5107	34.1178	782.887	75.7178	632.406
Male	18	Government	Yes	No	Mid	Mobile Data	3G	2024-01-03	No	Mobile	State	0.5	Yes	Private	0	Always	Yes	Yes	Yes	JO	Engineering	S	99	96	89	84	Yes	Under-7	H	BB	Low	Yes	Yes	60	22.7337	58.7609	271.646	51.9204	609.033
Female	18	Non Government	Yes	Yes	Mid	Wifi	3G	2024-01-03	No	Computer	State	0.5	Yes	Private	0	Always	Yes	Yes	No	SA	English	F	82	89	22	31	Yes	Under-7	H	AA	Moderate	Yes	Yes	61	23.5134	50.1556	611.388	82.7892	522.64
Female	18	Government	No	Yes	Mid	Wifi	4G	2024-01-03	No	Mobile	Private	1	No	Private	0	Sometimes	No	Yes	Yes	LEB	Astronomy	S	84	92	29	43	Yes	Under-7	H	CB	Low	Yes	Yes	94	27.4202	58.3506	832.79	85.6164	938.454
Female	20	Non Government	No	Yes	Mid	Mobile Data	4G	2024-01-03	No	Mobile	Private	1	No	Private	0	Always	No	Yes	No	UAE	Mathematics	F	70	69	46	45	Yes	Above-7	M	BB	Moderate	Yes	Yes	68	28.705	39.9577	791.423	31.4659	530.503
Female	22	Government	No	No	Poor	Mobile Data	3G	2024-01-03	No	Mobile	State	1	No	Bus	0	Always	Yes	Yes	Yes	OM	English	S	74	62	49	43	Yes	Above-7	M	BB	Moderate	Yes	Yes	58	29.464	42.9775	822.693	89.3102	782.004
Female	18	Non Government	No	Yes	Mid	Mobile Data	4G	2024-03-06	No	Mobile	State	0.75	No	Private	0	Sometimes	No	Yes	Yes	OM	Biology	F	90	79	76	79	Yes	Under-7	H	AA	Moderate	Yes	Yes	52	27.4428	43.3686	891.391	72.6014	928.459
Female	18	Non Government	Yes	No	Mid	Mobile Data	3G	2024-01-03	No	Mobile	State	0.5	Yes	Private	0	Never	No	No	Yes	JO	Engineering	S	84	77	79	68	Yes	Under-7	H	BA	Moderate	Yes	Yes	58	21.7849	31.0297	943.914	61.2235	420.948
Male	22	Non Government	No	Yes	Rich	Mobile Data	3G	2024-01-03	No	Mobile	State	0.5	Yes	Bus	0	Sometimes	No	No	Yes	JO	Statistics	F	80	80	62	11	Yes	Above-7	M	Fail	Moderate	No	No	58	26.2576	43.6419	464.969	53.3717	897.275
Male	20	Non Government	Yes	Yes	Poor	Wifi	4G	2024-01-03	Yes	Computer	Private	1	No	Private	0	Always	Yes	No	No	UAE	Neuroscience	S	81	82	69	13	Yes	Above-7	M	BA	High	Yes	Yes	77	23.2512	62.1322	611.892	61.1111	646.36
Male	19	Non Government	No	Yes	Mid	Mobile Data	4G	2024-01-03	No	Mobile	State	0.75	Yes	Bus	12	Sometimes	No	No	Yes	OM	Neuroscience	F	10	0	2	41	No	Above-7	L	Fail	Low	No	No	75	21.056	65.8919	811.594	49.4775	794.785
Male	19	Non Government	No	No	Mid	Mobile Data	3G	0	No	Mobile	State	0.75	Yes	Bus	2	Sometimes	No	No	Yes	UAE	Statistics	S	11	2	9	49	No	Above-7	L	Fail	Low	No	No	63	28.0905	50.7287	727.426	67.3613	623.443
Male	21	Government	No	Yes	Mid	Mobile Data	4G	0	No	Mobile	State	0.5	Yes	Private	0	Always	No	Yes	No	JO	English	F	85	89	22	61	No	Under-7	H	CC	Low	Yes	Yes	61	18.4611	48.2201	995.968	35.5788	817.31
Male	24	Non Government	No	Yes	Mid	Mobile Data	3G	2024-01-03	No	Mobile	State	0.75	No	Private	0	Never	No	Yes	Yes	UAE	Environmental Science	S	80	89	23	68	No	Under-7	H	CC	Low	Yes	Yes	60	28.8211	31.233	112.31	67.2674	552.577
Male	19	Non Government	Yes	Yes	Mid	Wifi	4G	2024-01-03	No	Mobile	Private	0.75	No	Private	0	Always	Yes	No	No	SA	Engineering	F	95	87	62	81	No	Under-7	M	AA	Low	Yes	Yes	53	23.5377	65.1682	419.62	46.5207	413.158
Male	24	Non Government	Yes	Yes	Mid	Wifi	3G	2024-03-06	Yes	Mobile	State	0.75	Yes	Bus	12	Sometimes	No	Yes	No	KW	Materials Science	S	87	79	73	98	No	Under-7	M	CB	Moderate	Yes	Yes	53	25.6464	30.5204	352.925	31.0581	968.673
Male	20	Government	No	Yes	Mid	Wifi	4G	2024-03-06	No	Mobile	Private	1	No	Private	12	Always	Yes	No	Yes	LEB	Physics	F	85	87	72	10	Yes	Above-7	M	BB	Moderate	Yes	Yes	53	25.9122	67.79	336.084	63.1623	409.821
Male	18	Government	Yes	Yes	Mid	Mobile Data	3G	2024-01-03	No	Computer	Other	0.5	Yes	Private	0	Always	Yes	Yes	No	UAE	Computer Science	S	79	88	79	20	Yes	Above-7	M	AA	Low	Yes	Yes	67	28.7414	49.5686	300.277	64.7069	894.46
Male	23	Government	Yes	Yes	Mid	Wifi	4G	2024-03-06	No	Computer	Other	0.5	Yes	Private	0	Always	Yes	No	Yes	LEB	Geology	F	80	81	71	30	Yes	Under-7	M	AA	Low	Yes	Yes	69	25.64	43.6774	738.211	55.5941	501.483
Male	23	Government	No	No	Poor	Mobile Data	2G	2024-01-03	No	Mobile	State	0.5	No	Private	2	Never	No	No	No	JO	Computer Science	S	70	83	70	23	Yes	Under-7	M	AA	Low	Yes	Yes	63	25.3672	66.9687	176.284	34.3372	635.332
Male	23	Government	Yes	Yes	Mid	Mobile Data	4G	2024-01-03	No	Mobile	Private	0.5	Yes	Bus	2	Always	No	Yes	No	JO	Materials Science	F	80	82	76	19	Yes	Under-7	M	AA	Moderate	Yes	Yes	63	18.7998	30.9756	767.448	83.6006	893.495
Male	22	Non Government	Yes	Yes	Mid	Wifi	4G	2024-01-03	Yes	Computer	Private	0.5	No	Bus	12	Always	Yes	No	Yes	SA	Biology	S	70	82	75	29	Yes	Under-7	M	AA	High	Yes	Yes	80	24.2209	53.257	724.083	66.6858	523.559
Male	20	Non Government	Yes	No	Poor	Wifi	2G	2024-03-06	Yes	Tab	State	0.5	No	Private	2	Always	Yes	No	Yes	LEB	English	F	89	87	86	15	Yes	Under-7	M	BA	Low	Yes	Yes	84	19.802	51.9573	325.724	36.9428	919.425
Male	22	Non Government	No	Yes	Poor	Mobile Data	3G	2024-01-03	No	Mobile	State	0.75	No	Private	0	Always	No	Yes	Yes	JO	Engineering	S	90	86	85	10	Yes	Under-7	M	CC	Low	Yes	Yes	62	26.8492	38.7728	327.55	60.6558	698.655
Male	24	Non Government	No	Yes	Mid	Wifi	4G	2024-03-06	No	Computer	State	0.5	Yes	Bus	2	Sometimes	No	Yes	Yes	SA	Neuroscience	F	69	77	76	75	Yes	Above-7	M	BA	Moderate	Yes	Yes	63	24.1467	47.1555	665.975	59.8353	619.692
Male	21	Non Government	Yes	Yes	Poor	Wifi	3G	2024-03-06	No	Mobile	Other	0.5	No	Bus	0	Always	No	No	No	LEB	Computer Science	S	70	76	65	70	Yes	Above-7	M	CC	Low	Yes	Yes	47	26.1627	56.0906	785.954	33.6241	797.463
Male	21	Non Government	No	Yes	Mid	Wifi	4G	2024-01-03	No	Mobile	State	0.5	No	Bus	12	Never	No	Yes	No	SA	Astronomy	F	75	72	64	39	Yes	Above-7	L	Fail	Moderate	No	No	79	18.5001	59.0852	888.837	66.4116	604.834
Male	20	Government	No	Yes	Rich	Mobile Data	4G	2024-01-03	No	Mobile	Private	0.5	No	Private	12	Sometimes	No	No	No	SA	Mathematics	S	72	76	66	40	Yes	Above-7	L	BA	Moderate	Yes	Yes	62	19.0175	30.0287	866.926	78.4996	608.373
Male	18	Government	No	Yes	Mid	Mobile Data	4G	2024-01-03	No	Mobile	Private	0.75	Yes	Private	8	Sometimes	No	Yes	No	UAE	Materials Science	F	77	82	74	79	Yes	Under-7	M	Fail	Low	No	No	70	26.5959	67.4741	968.395	74.9405	840.116
Male	18	Government	Yes	Yes	Rich	Wifi	4G	2024-01-03	No	Computer	Private	0.75	No	Private	0	Always	Yes	No	No	JO	Statistics	S	71	84	67	80	Yes	Under-7	M	Fail	High	No	No	80	18.865	36.581	623.246	42.1782	585.899
Male	21	Non Government	Yes	Yes	Mid	Wifi	3G	2024-03-06	Yes	Computer	State	1	No	Private	0	Always	Yes	No	No	SA	Engineering	F	87	92	74	89	Yes	Under-7	H	AA	Low	Yes	Yes	80	18.8551	39.3432	917.79	81.7376	520.464
Male	21	Non Government	No	Yes	Mid	Mobile Data	4G	2024-01-03	No	Mobile	State	0.75	Yes	Private	12	Never	No	No	Yes	SA	Physics	S	81	84	77	85	Yes	Under-7	H	BA	Moderate	Yes	Yes	68	18.1453	40.5389	827.662	50.5525	884.588
Female	18	Government	Yes	No	Rich	Wifi	4G	0	No	Mobile	State	0.5	No	Private	0	Always	No	Yes	No	SA	Engineering	F	15	97	22	10	Yes	Under-7	H	BA	Low	Yes	Yes	58	29.478	31.5128	905.201	86.7905	883.223
Female	20	Non Government	No	Yes	Mid	Wifi	4G	2024-01-03	Yes	Mobile	State	1	No	Private	0	Always	Yes	No	No	UAE	Biology	S	19	98	20	2	Yes	Under-7	H	AA	Moderate	Yes	Yes	83	26.8501	34.9221	110.464	34.3049	698.551
Female	20	Government	No	No	Poor	Mobile Data	4G	2024-03-06	No	Mobile	State	0.5	No	Private	0	Always	Yes	No	No	JO	Mathematics	F	25	82	52	20	Yes	Above-7	M	BA	Moderate	Yes	Yes	50	22.239	69.454	969.313	59.1725	715.993
Female	19	Non Government	No	Yes	Poor	Mobile Data	4G	2024-03-06	No	Mobile	State	0.75	No	Private	12	Always	Yes	No	No	OM	Computer Science	S	29	78	40	12	Yes	Above-7	M	BA	Moderate	Yes	Yes	97	21.5584	42.6087	526.177	65.8275	817.646
Female	22	Government	No	Yes	Mid	Wifi	4G	2024-01-03	No	Mobile	Private	0.5	No	Bus	2	Sometimes	No	No	Yes	KW	Mathematics	F	45	87	57	80	Yes	Under-7	M	BB	Low	Yes	Yes	78	22.1964	34.612	818.365	44.859	705.565
Female	18	Government	No	Yes	Rich	Mobile Data	4G	2024-01-03	Yes	Mobile	State	1	Yes	Bus	0	Never	No	No	Yes	SA	Biology	S	39	88	43	72	Yes	Under-7	M	AA	Low	Yes	Yes	72	27.2958	34.2797	214.484	76.2828	650.224
Female	18	Government	No	Yes	Poor	Mobile Data	4G	0	No	Mobile	State	1	No	Bus	0	Never	No	No	No	KW	Chemistry	F	85	90	52	30	Yes	Under-7	H	AA	Low	Yes	Yes	80	25.9364	58.7784	456.347	67.6137	996.937
Female	20	Non Government	No	Yes	Rich	Wifi	4G	2024-03-06	No	Tab	State	0.5	Yes	Bus	0	Always	Yes	Yes	Yes	OM	Statistics	S	79	91	49	22	Yes	Under-7	H	BB	Moderate	Yes	Yes	72	20.2223	64.1827	344.315	31.0866	488.584
Male	18	Government	No	No	Mid	Mobile Data	3G	0	No	Mobile	State	0.25	Yes	Private	12	Always	Yes	Yes	No	LEB	Engineering	F	90	91	80	81	Yes	Under-7	H	AA	Low	Yes	Yes	63	20.0893	40.2781	362.493	66.5021	755.637
Male	21	Government	Yes	No	Mid	Mobile Data	3G	2024-01-03	No	Mobile	State	0.5	No	Private	2	Always	Yes	No	Yes	OM	Statistics	S	80	90	80	83	Yes	Under-7	H	BA	Moderate	Yes	Yes	58	19.1807	30.8364	210.93	59.4887	931.518
Male	22	Government	No	No	Poor	Mobile Data	4G	2024-03-06	No	Mobile	State	0.5	No	Bus	0	Always	No	Yes	No	JO	Chemistry	F	80	83	82	71	Yes	Above-7	M	BB	Moderate	Yes	Yes	60	25.9236	38.9236	825.187	41.7618	812.329
Male	19	Government	No	Yes	Mid	Wifi	4G	2024-01-03	No	Mobile	State	0.5	No	Bus	0	Always	Yes	Yes	No	SA	Neuroscience	S	71	81	83	72	Yes	Above-7	M	AA	High	Yes	Yes	48	27.1725	32.2606	108.318	89.7449	928.554
Male	21	Government	No	No	Mid	Mobile Data	4G	0	No	Mobile	Private	0.5	Yes	Private	0	Always	Yes	Yes	Yes	SA	Chemistry	F	72	87	72	89	Yes	Above-7	M	AA	Low	Yes	Yes	64	21.1806	34.1358	381.255	83.8297	601.801
Male	21	Non Government	No	Yes	Mid	Mobile Data	3G	2024-01-03	No	Mobile	State	0.5	No	Bus	0	Never	No	No	No	JO	Physics	S	69	77	83	92	Yes	Above-7	M	BB	Moderate	Yes	Yes	62	18.2513	47.2603	256.969	47.5505	563.196
Female	23	Non Government	No	Yes	Mid	Wifi	4G	2024-01-03	No	Mobile	Other	0.75	No	Private	0	Never	No	No	Yes	JO	Materials Science	F	85	99	42	90	Yes	Under-7	H	CC	Low	Yes	Yes	80	18.9861	39.1967	630.135	62.4643	910.763
Female	19	Non Government	No	Yes	Mid	Mobile Data	4G	2024-01-03	No	Mobile	State	1	Yes	Bus	0	Always	No	Yes	Yes	UAE	Chemistry	S	89	96	45	92	Yes	Under-7	H	CC	Low	Yes	Yes	56	29.6143	50.6378	328.827	48.9901	636.469
Female	19	Non Government	No	Yes	Mid	Mobile Data	4G	2024-01-03	No	Mobile	State	0.5	Yes	Private	0	Always	No	Yes	No	KW	Materials Science	F	80	82	64	58	Yes	Under-7	H	BB	Moderate	Yes	Yes	78	21.5453	40.1398	333.099	76.5297	825.809
Female	21	Non Government	No	Yes	Mid	Wifi	4G	2024-03-06	No	Computer	State	0.5	No	Private	2	Always	Yes	No	No	SA	Chemistry	S	87	93	63	60	Yes	Under-7	H	AA	Moderate	Yes	Yes	69	27.2307	67.6215	539.504	85.8199	488.649
Female	24	Government	No	No	Mid	Wifi	4G	0	No	Mobile	State	0.5	Yes	Bus	0	Always	Yes	Yes	No	KW	Physics	F	15	9	14	80	No	Above-7	L	BA	Low	Yes	Yes	63	25.496	66.2378	687.42	51.5297	853.503
Female	20	Non Government	No	Yes	Poor	Mobile Data	3G	2024-01-03	No	Mobile	Private	0.5	No	Bus	2	Always	Yes	No	Yes	UAE	Neuroscience	S	9	6	15	85	No	Above-7	L	BA	Low	Yes	Yes	71	22.5833	52.6722	209.174	78.3351	729.39
Male	19	Non Government	No	Yes	Poor	Mobile Data	3G	2024-01-03	No	Mobile	Private	0.75	No	Private	12	Always	Yes	Yes	No	SA	Neuroscience	F	81	86	86	41	Yes	Under-7	M	AA	High	Yes	Yes	71	20.4682	44.177	257.96	59.9045	561.167
Male	22	Non Government	No	Yes	Mid	Mobile Data	4G	2024-01-03	No	Mobile	Other	0.75	Yes	Bus	12	Always	Yes	Yes	Yes	KW	Chemistry	S	78	82	78	53	Yes	Under-7	M	BA	Moderate	Yes	Yes	59	19.4566	45.2459	322.457	53.7947	696.702
Male	20	Non Government	No	Yes	Poor	Mobile Data	3G	2024-01-03	No	Mobile	State	0.5	Yes	Bus	2	Sometimes	No	No	Yes	KW	Biology	F	80	87	74	68	Yes	Under-7	M	AA	Low	Yes	Yes	92	25.3802	46.4741	976.373	86.3053	818.166
Male	22	Government	No	Yes	Poor	Mobile Data	4G	0	No	Mobile	State	1	No	Private	0	Always	Yes	No	Yes	KW	Environmental Science	S	85	88	79	70	Yes	Under-7	M	BA	Low	Yes	Yes	63	27.2956	59.1032	457.437	60.6243	407.132
Female	19	Non Government	No	Yes	Rich	Wifi	4G	2024-03-06	No	Computer	State	0.5	No	Bus	0	Always	No	Yes	Yes	UAE	Physics	F	2	7	4	8	No	Above-7	L	AA	High	Yes	Yes	67	25.7269	48.0656	639.091	58.0446	782.48
Female	24	Non Government	No	Yes	Mid	Mobile Data	4G	2024-01-03	No	Mobile	Private	0.5	No	Private	2	Always	Yes	No	Yes	KW	Physics	S	5	4	5	8	No	Above-7	L	AA	High	Yes	Yes	56	24.3636	64.2692	317.389	70.3461	724.954
Female	19	Non Government	Yes	No	Mid	Mobile Data	3G	2024-01-03	Yes	Mobile	State	0.5	Yes	Private	2	Always	No	Yes	No	JO	Biology	F	50	77	14	28	No	Under-7	M	AA	Moderate	Yes	Yes	80	18.5034	67.7638	541.414	45.6741	532.172
Female	23	Non Government	Yes	Yes	Mid	Mobile Data	3G	2024-03-06	Yes	Mobile	State	0.5	No	Private	0	Never	No	Yes	No	SA	Neuroscience	S	55	74	25	29	No	Under-7	M	AA	Moderate	Yes	Yes	64	29.6219	43.4378	166.707	49.4876	851.789
Female	20	Non Government	Yes	Yes	Mid	Mobile Data	4G	2024-01-03	No	Mobile	State	0.5	No	Bus	0	Always	Yes	No	Yes	UAE	Physics	F	30	17	14	57	No	Above-7	L	CB	Moderate	Yes	Yes	58	27.5846	52.4278	131.268	85.9228	582.077
Female	22	Non Government	No	Yes	Poor	Mobile Data	4G	2024-01-03	No	Mobile	Other	0.5	No	Bus	0	Always	Yes	Yes	Yes	JO	Physics	S	35	14	23	62	No	Above-7	L	AA	Low	Yes	Yes	80	21.5139	33.8023	521.86	70.7118	566.117
Male	23	Government	No	No	Poor	Mobile Data	4G	2024-03-06	No	Mobile	0.5	No	No	0	Always	No	Yes	No	No	UAE	Computer Science	F	12	30	0	17	No	Above-7	L	BB	Moderate	Yes	Yes	67	29.7596	38.0188	458.793	79.5982	682.731
Male	20	Government	No	Yes	Mid	Wifi	4G	2024-01-03	No	Mobile	0.5	No	Yes	0	Always	Yes	Yes	No	No	JO	Biology	F	2	9	7	55	Yes	Under-7	M	AA	High	Yes	Yes	94	25.2226	46.5386	223.192	46.2667	805.69
Female	19	Government	No	No	Mid	Mobile Data	4G	0	No	Mobile	0.5	Yes	No	0	Always	Yes	Yes	Yes	No	SA	Materials Science	F	55	33	6	9	No	Above-7	L	AA	Low	Yes	Yes	58	24.9891	38.2481	718.841	62.6274	957.308
Male	22	Non Government	No	Yes	Mid	Mobile Data	3G	2024-01-03	No	Mobile	0.5	No	No	0	Never	No	No	No	No	JO	Mathematics	F	12	10	20	16	No	Under-7	L	BB	Moderate	Yes	Yes	77	26.9769	65.0624	993.613	88.2838	484.814
Male	21	Non Government	No	Yes	Mid	Wifi	4G	2024-01-03	No	Mobile	0.75	No	No	0	Never	No	No	Yes	Yes	SA	Statistics	F	70	90	2	2	Yes	Under-7	L	CC	Low	Yes	Yes	94	27.7412	36.3315	456.082	49.1222	637.881
Male	21	Non Government	No	Yes	Mid	Mobile Data	4G	2024-01-03	No	Mobile	1	Yes	Yes	0	Always	No	Yes	Yes	No	OM	English	F	7	9	5	30	No	Above-7	L	CC	Low	Yes	Yes	60	25.8777	48.2264	662.103	39.6286	440.194
Female	21	Non Government	No	Yes	Mid	Mobile Data	4G	2024-01-03	No	Mobile	0.5	Yes	No	0	Always	No	Yes	No	No	KW	Physics	F	80	42	20	50	Yes	Under-7	M	BB	Moderate	Yes	Yes	75	19.5371	54.228	966.678	60.6532	855.13
Male	18	Non Government	No	Yes	Mid	Wifi	4G	2024-03-06	No	Computer	0.5	No	No	2	Always	Yes	No	No	Yes	UAE	Environmental Science	S	0	3	10	3	No	Above-7	L	AA	Moderate	Yes	Yes	69	22.0592	57.6746	848.381	53.2693	668.64
Male	20	Government	No	No	Mid	Wifi	4G	0	No	Mobile	0.5	Yes	No	0	Always	Yes	Yes	No	No	SA	Biology	S	12	60	0	70	Yes	Above-7	L	BA	Low	Yes	Yes	64	29.137	45.3228	517.197	39.5746	824.157
Male	22	Non Government	No	Yes	Poor	Mobile Data	3G	2024-01-03	No	Mobile	0.5	No	No	2	Always	Yes	No	Yes	No	JO	Computer Science	S	80	80	15	70	Yes	Under-7	H	BA	Low	Yes	Yes	60	20.6954	64.764	763.741	83.3131	593.317
Female	18	Non Government	No	Yes	Poor	Mobile Data	3G	2024-01-03	No	Mobile	0.75	No	No	12	Always	Yes	Yes	No	No	KW	Statistics	S	70	80	95	70	Yes	Under-7	H	AA	High	Yes	Yes	71	22.466	52.7328	215.322	89.4434	906.59
Female	23	Non Government	No	Yes	Mid	Mobile Data	4G	2024-01-03	No	Mobile	0.75	Yes	No	12	Always	Yes	Yes	Yes	Yes	OM	Geology	S	70	80	95	70	Yes	Under-7	H	BA	Moderate	Yes	Yes	53	23.1849	47.5803	560.893	64.1149	720.897
Female	24	Non Government	No	Yes	Poor	Mobile Data	3G	2024-01-03	No	Mobile	0.5	Yes	Yes	2	Sometimes	No	No	Yes	Yes	UAE	Astronomy	F	60	80	50	40	No	Under-7	M	AA	Low	Yes	Yes	43	23.2729	32.6896	351.154	76.4806	966.165
Female	18	Government	No	Yes	Poor	Mobile Data	4G	0	No	Mobile	1	No	No	0	Always	Yes	No	Yes	Yes	JO	Chemistry	F	100	80	95	90	No	Under-7	H	BA	Low	Yes	Yes	74	25.3553	48.5876	245.047	81.5423	447.289
Male	19	Non Government	No	Yes	Rich	Wifi	4G	2024-03-06	No	Computer	0.5	No	No	0	Always	No	Yes	Yes	Yes	SA	Biology	F	100	85	85	70	No	Under-7	M	AA	High	Yes	Yes	77	29.3169	62.8294	483.653	72.0589	708.566
Male	19	Non Government	No	Yes	Mid	Mobile Data	4G	2024-01-03	No	Mobile	0.5	No	No	2	Always	Yes	No	Yes	Yes	SA	Astronomy	F	10	60	5	20	Yes	Above-7	L	AA	High	Yes	Yes	68	20.8883	54.5816	217.913	32.6494	859.873
Female	19	Non Government	Yes	No	Mid	Mobile Data	3G	2024-01-03	Yes	Mobile	0.5	Yes	No	2	Always	No	Yes	No	Yes	SA	Geology	S	19	65	50	10	No	Above-7	L	AA	Moderate	Yes	Yes	48	19.458	63.2865	729.087	39.4581	760.092
Male	18	Non Government	Yes	Yes	Mid	Mobile Data	3G	2024-03-06	Yes	Mobile	0.5	No	Yes	0	Never	No	Yes	No	Yes	KW	English	S	10	75	55	11	Yes	Under-7	M	AA	Moderate	Yes	Yes	81	20.3696	49.7605	510.616	34.2594	413.916
Female	18	Non Government	Yes	Yes	Mid	Mobile Data	4G	2024-01-03	No	Mobile	0.5	No	No	0	Always	Yes	No	Yes	No	KW	Computer Science	S	80	90	55	19	Yes	Under-7	H	CB	Moderate	Yes	Yes	59	28.6431	34.7385	578.03	30.5928	983.403
Male	22	Non Government	No	Yes	Poor	Mobile Data	4G	2024-01-03	No	Mobile	0.5	No	No	0	Always	Yes	Yes	Yes	Yes	SA	English	S	10	10	15	19	No	Above-7	L	AA	Low	Yes	Yes	74	25.7497	30.5456	231.738	48.3598	578.958
Male	20	Non Government	No	Yes	Mid	Wifi	4G	2024-01-03	No	Computer	0.5	No	No	8	Always	Yes	No	Yes	No	LEB	Materials Science	S	70	75	55	11	Yes	Under-7	M	BB	Low	Yes	Yes	50	21.4309	42.1288	225.794	53.5414	549.567
Male	18	Government	No	Yes	Mid	Wifi	4G	2024-01-03	No	Mobile	0.5	No	No	0	Always	Yes	Yes	No	No	KW	Neuroscience	S	100	75	50	70	Yes	Under-7	H	CC	Low	Yes	Yes	63	27.7914	57.9196	625.074	44.4618	691.396
Male	22	Government	No	Yes	Mid	Wifi	4G	2024-01-03	No	Mobile	0.5	No	No	0	Always	No	Yes	Yes	Yes	LEB	Geology	S	10	79	30	30	No	Under-7	M	BB	High	Yes	Yes	69	28.3364	61.6104	986.509	33.8763	725.295
Male	18	Non Government	No	Yes	Rich	Wifi	4G	2024-03-06	No	Mobile	0.5	No	Yes	0	Always	No	No	Yes	No	KW	Geology	S	60	55	30	40	No	Under-7	M	AA	High	Yes	Yes	78	28.1582	41.8301	186.626	61.7918	859.773
Male	20	Government	No	Yes	Mid	Wifi	4G	2024-01-03	No	Mobile	0.75	No	No	2	Never	Yes	No	Yes	Yes	JO	Astronomy	S	100	75	50	70	Yes	Under-7	H	BA	Moderate	Yes	Yes	62	29.0271	49.8262	357.158	46.3992	635.964
Female	18	Non Government	No	Yes	Poor	Mobile Data	3G	2024-01-03	No	Mobile	0.5	No	No	2	Sometimes	Yes	Yes	Yes	Yes	LEB	Computer Science	S	80	80	51	59	Yes	Under-7	H	AA	Moderate	Yes	Yes	64	21.0269	46.8448	882.513	77.7622	663.976
Female	20	Non Government	No	No	Mid	Wifi	4G	2024-03-06	No	Mobile	0.5	Yes	Yes	0	Always	Yes	Yes	No	No	UAE	Statistics	S	23	63	71	89	Yes	Under-7	M	CB	Moderate	Yes	Yes	58	27.0605	46.4209	165.045	30.4832	720.976
Female	22	Non Government	No	Yes	Mid	Mobile Data	4G	2024-01-03	No	Mobile	0.5	Yes	No	2	Always	Yes	Yes	Yes	No	KW	Physics	S	100	91	98	40	Yes	Under-7	H	AA	Moderate	Yes	Yes	68	23.5265	39.2539	888.297	80.5516	636.632
Female	22	Non Government	Yes	Yes	Mid	Mobile Data	3G	2024-01-03	No	Mobile	0.5	No	Yes	2	Always	Yes	Yes	Yes	No	SA	Geology	S	10	51	40	40	No	Above-7	L	CC	Low	Yes	Yes	58	28.104	35.4548	571.857	87.2852	948.729
Female	23	Government	No	Yes	Mid	Wifi	3G	0	Yes	Mobile	0.5	No	No	12	Never	No	Yes	No	Yes	OM	Neuroscience	S	70	50	33	41	No	Above-7	M	BB	Low	Yes	Yes	73	26.7419	37.8675	467.44	72.9681	910.751
Male	20	Government	No	Yes	Mid	Mobile Data	4G	2024-01-03	No	Mobile	0.5	Yes	No	8	Always	No	Yes	Yes	No	SA	Mathematics	S	70	58	73	91	Yes	Under-7	H	BB	Moderate	Yes	Yes	61	27.3174	32.2133	378.713	74.0186	672.984
Female	20	Government	No	Yes	Mid	Wifi	4G	0	No	Mobile	0.5	No	Yes	0	Always	Yes	Yes	Yes	No	OM	Environmental Science	S	70	50	30	49	Yes	Under-7	M	CC	Low	Yes	Yes	73	25.8739	37.9252	367.405	86.0137	400.117
Female	19	Non Government	No	Yes	Mid	Mobile Data	4G	2024-01-03	No	Mobile	0.5	Yes	Yes	0	Always	Yes	Yes	No	No	KW	Chemistry	S	70	50	33	40	No	Under-7	M	CB	Moderate	Yes	Yes	61	20.1291	30.368	375.222	42.5443	940.561
Female	22	Non Government	No	Yes	Poor	Mobile Data	4G	2024-01-03	No	Mobile	0.5	No	No	12	Always	Yes	Yes	Yes	No	OM	Geology	S	22	51	48	10	No	Above-7	L	BB	Moderate	Yes	Yes	63	24.5403	55.0903	896.323	89.6739	474.602
Male	24	Non Government	No	Yes	Poor	Mobile Data	3G	2024-01-03	No	Mobile	0.5	No	Yes	0	Always	Yes	Yes	No	No	JO	Chemistry	S	62	68	48	80	Yes	Under-7	M	CC	Moderate	Yes	Yes	85	29.816	42.655	751.416	76.4089	546.707
Male	19	Non Government	No	Yes	Rich	Mobile Data	4G	2024-01-03	No	Mobile	0.5	No	No	12	Sometimes	Yes	6	Yes	No	JO	Engineering	S	82	89	58	50	Yes	Under-7	H	BA	High	Yes	Yes	66	29.2487	68.9258	702.751	73.5942	491.417
Male	19	Non Government	No	Yes	Mid	Mobile Data	4G	2024-01-03	No	Mobile	0.5	No	Yes	2	Always	No	Yes	Yes	No	OM	Materials Science	S	72	80	58	66	No	Under-7	M	CC	Moderate	Yes	Yes	80	18.5181	37.7487	818.874	51.6654	507.889
Male	24	Government	No	No	Mid	Wifi	4G	2024-01-03	No	Mobile	0.5	No	No	0	Never	No	No	Yes	Yes	UAE	Geology	S	70	82	3	73	No	Under-7	H	BB	Low	Yes	Yes	72	19.9778	43.8331	331.403	62.7466	881.727
Female	21	Non Government	No	Yes	Rich	Wifi	4G	2024-01-03	No	Mobile	0.75	No	No	2	Always	Yes	Yes	Yes	No	OM	Materials Science	S	60	82	93	43	No	Above-7	M	CC	High	Yes	Yes	74	19.5807	44.3136	656.239	69.2351	747.701
Male	18	Non Government	No	Yes	Mid	Wifi	4G	2024-01-03	No	Mobile	1	No	No	0	Always	Yes	No	No	Yes	JO	Mathematics	S	55	72	83	14	Yes	Above-7	M	BB	Low	Yes	Yes	64	26.7118	30.3381	514.06	67.2206	973.657
Female	24	Non Government	No	Yes	Poor	Mobile Data	3G	2024-01-03	No	Mobile	0.5	No	No	12	Always	Yes	No	No	No	LEB	Astronomy	S	72	65	73	66	Yes	Under-7	H	BA	Moderate	Yes	Yes	63	27.8134	63.5683	804.197	72.2991	538.872
Male	20	Government	No	No	Poor	Mobile Data	4G	0	No	Mobile	0.5	No	No	0	Always	Yes	No	No	No	LEB	Astronomy	S	51	82	53	43	No	Under-7	M	CC	Low	Yes	Yes	73	20.5621	31.2798	378.33	34.9429	691.381
Male	22	Government	Yes	No	Poor	Mobile Data	4G	2024-01-03	No	Mobile	0.5	Yes	Yes	12	Always	No	No	No	No	SA	Mathematics	S	80	92	83	43	Yes	Under-7	H	AA	Moderate	Yes	Yes	73	24.0702	67.6072	678.861	51.3389	986.457
Male	24	Non Government	No	Yes	Poor	Mobile Data	4G	2024-01-03	Yes	Mobile	0.75	Yes	No	0	Always	Yes	No	Yes	No	SA	Chemistry	S	60	52	23	33	Yes	Under-7	H	CC	High	Yes	Yes	58	28.0884	65.683	893.991	56.04	895.866
Male	19	Government	No	Yes	Mid	Wifi	4G	2024-01-03	No	Mobile	0.75	No	No	0	Always	Yes	No	No	Yes	LEB	Geology	S	30	12	29	23	No	Under-7	M	CC	Moderate	Yes	Yes	67	26.7936	51.4209	461.935	45.6378	837.169
Female	24	Government	No	No	Mid	Mobile Data	3G	2024-01-03	No	Mobile	0.75	No	Yes	0	Always	Yes	Yes	Yes	Yes	KW	Computer Science	S	40	62	83	33	Yes	Under-7	H	DD	Low	Yes	Yes	84	24.5068	51.7438	159.96	40.3576	513.385
Male	18	Government	Yes	No	Poor	Mobile Data	4G	2024-01-03	No	Mobile	0.75	No	No	0	Always	No	Yes	Yes	No	OM	Geology	S	60	52	23	33	No	Under-7	M	DC	Moderate	Yes	Yes	71	25.0842	56.1511	564.446	38.3356	861.643
Male	20	Government	Yes	No	Mid	Mobile Data	4G	0	No	Mobile	0.5	No	Yes	0	Always	No	Yes	Yes	Yes	LEB	Mathematics	S	20	22	53	13	No	Above-7	L	DC	Low	Yes	Yes	68	24.1003	45.482	411.375	51.983	608.539
Female	21	Government	No	Yes	Mid	Mobile Data	4G	2024-01-03	No	Mobile	0.75	No	No	0	Always	No	Yes	Yes	No	JO	Geology	S	20	52	23	33	Yes	Above-7	L	DC	Low	Yes	Yes	85	21.5706	55.8889	705.003	59.6065	718.322
Male	19	Non Government	Yes	Yes	Mid	Wifi	4G	2024-03-06	Yes	Computer	0.75	No	No	0	Always	Yes	No	No	No	KW	Computer Science	S	50	62	73	43	Yes	Above-7	M	DD	Low	Yes	Yes	77	24.7803	31.7907	955.93	33.7786	765.497
Male	18	Non Government	No	Yes	Rich	Mobile Data	3G	2024-01-03	No	Mobile	0.75	No	Yes	0	Always	No	Yes	No	No	SA	Biology	S	10	2	13	53	No	Above-7	L	DD	Moderate	Yes	Yes	72	26.2666	32.1619	537.047	86.7875	765.618
Male	18	Government	No	Yes	Mid	Wifi	4G	2024-01-03	No	Mobile	0.25	No	Yes	2	Always	Yes	Yes	No	No	UAE	English	S	60	52	23	33	Yes	Under-7	H	CB	High	Yes	Yes	74	28.4799	48.2892	519.571	75.9146	835.914
Female	23	Non Government	No	Yes	Mid	Wifi	4G	2024-01-03	No	Mobile	0.25	No	No	2	Sometimes	No	6	No	Yes	LEB	Environmental Science	S	15	52	83	11	Yes	Under-7	M	DD	Low	Yes	Yes	59	25.6355	51.9849	689.126	73.8511	797.021
Female	23	Non Government	Yes	Yes	Mid	Mobile Data	3G	2024-01-03	No	Mobile	0.75	Yes	Yes	0	Always	Yes	Yes	Yes	No	JO	Geology	S	80	42	33	13	Yes	Under-7	H	CB	Low	Yes	Yes	64	27.1335	65.5127	193.148	40.3716	441.023
Female	21	Government	No	Yes	Mid	Wifi	4G	2024-01-03	Yes	Mobile	0.75	No	No	0	Always	Yes	Yes	Yes	No	JO	Astronomy	S	40	51	20	33	No	Under-7	M	BB	Low	Yes	Yes	63	19.9209	34.1864	328.156	66.228	674.408
Male	23	Non Government	No	Yes	Mid	Wifi	4G	2024-01-03	No	Mobile	0.5	Yes	No	0	Sometimes	Yes	Yes	Yes	Yes	KW	English	S	60	70	63	93	Yes	Under-7	H	CB	Moderate	Yes	Yes	60	23.5387	62.9059	927.081	61.7835	798.413
Female	21	Non Government	No	Yes	Poor	Mobile Data	4G	2024-01-03	No	Mobile	0.5	Yes	No	0	Always	No	Yes	No	No	JO	Computer Science	S	50	62	13	33	No	Above-7	L	BB	Moderate	Yes	Yes	60	18.112	38.4019	702.948	88.9481	577.596
Male	22	Non Government	No	Yes	Mid	Mobile Data	3G	2024-01-03	No	Mobile	0.75	Yes	No	2	Always	Yes	No	Yes	No	SA	Engineering	S	85	75	62	53	Yes	Under-7	H	DD	Low	Yes	Yes	74	20.9601	45.7633	112.1	74.8603	587.834
Male	23	Non Government	No	Yes	Mid	Mobile Data	3G	2024-01-03	No	Mobile	0.5	No	No	12	Always	Yes	Yes	No	Yes	OM	Computer Science	S	25	15	32	53	No	Under-7	M	DD	Moderate	Yes	Yes	68	26.7175	42.6641	284.163	64.5457	474.741
Male	24	Non Government	No	No	Mid	Mobile Data	4G	2024-01-03	No	Mobile	0.5	Yes	No	12	Always	No	Yes	No	No	OM	Astronomy	S	10	35	30	13	No	Above-7	L	DD	Moderate	Yes	Yes	75	29.9017	46.0062	714.554	81.0488	651.169
Female	20	Non Government	Yes	No	Mid	Mobile Data	3G	2024-03-06	Yes	Mobile	1	No	No	2	Always	Yes	Yes	Yes	No	OM	Geology	S	87	65	82	33	Yes	Under-7	H	CB	Moderate	Yes	Yes	77	19.1901	36.0198	787.959	39.3057	992.098
Male	23	Non Government	No	Yes	Mid	Wifi	4G	2024-01-03	No	Mobile	0.75	No	No	0	Never	No	No	Yes	Yes	KW	Materials Science	S	85	15	22	53	Yes	Under-7	M	CC	Low	Yes	Yes	65	22.8179	50.1428	855.874	30.913	571.192
Female	18	Government	No	Yes	Rich	Wifi	4G	2024-01-03	No	Mobile	0.5	No	Yes	2	Always	Yes	No	No	Yes	JO	Mathematics	S	80	71	52	51	Yes	Under-7	M	DC	Moderate	Yes	Yes	70	27.6009	62.0657	362.959	71.414	718.862
Male	22	Government	Yes	Yes	Mid	Wifi	4G	0	No	Computer	0.75	No	Yes	0	Always	Yes	Yes	No	Yes	JO	Materials Science	S	75	71	72	53	Yes	Under-7	H	DC	Low	Yes	Yes	78	20.4484	47.6614	937.926	35.8987	845.942
Male	18	Non Government	No	Yes	Rich	Mobile Data	3G	2024-01-03	No	Mobile	0.5	No	No	0	Always	Yes	No	No	No	OM	Neuroscience	S	85	66	12	23	No	Under-7	M	DC	Moderate	Yes	Yes	94	24.661	49.6245	597.652	36.926	408.098
Female	23	Non Government	No	No	Mid	Wifi	4G	2024-01-03	No	Mobile	0.5	No	Yes	0	Sometimes	No	No	Yes	Yes	OM	Neuroscience	S	23	25	32	53	No	Under-7	L	DC	Low	Yes	Yes	69	26.7969	63.9507	726.885	74.6808	940.264
Female	19	Government	No	No	Mid	Wifi	4G	2024-01-03	No	Mobile	1	Yes	Yes	0	Always	No	Yes	Yes	No	KW	Statistics	S	15	25	37	13	Yes	Above-7	L	DC	Low	Yes	Yes	80	25.3918	58.2423	637.065	46.2321	631.93
Female	20	Non Government	No	Yes	Mid	Wifi	4G	2024-01-03	No	Mobile	0.5	No	No	0	Always	Yes	No	No	No	OM	Biology	S	95	91	62	53	Yes	Under-7	M	DD	Low	Yes	Yes	60	20.2563	49.6182	210.466	67.7179	921.47
Male	24	Non Government	Yes	Yes	Mid	Wifi	4G	2024-01-03	No	Computer	None	Yes	No	0	Always	No	Yes	No	No	JO	Statistics	S	81	75	62	53	No	Under-7	M	CB	Moderate	Yes	Yes	65	22.2646	40.3078	966.803	85.0444	423.369
Female	24	Government	No	Yes	Mid	Wifi	4G	2024-01-03	Yes	Mobile	0.5	No	No	0	Always	Yes	No	No	No	SA	Statistics	S	53	75	72	23	No	Under-7	M	DC	Low	Yes	Yes	75	27.4055	65.3971	210.588	48.9885	487.398
Male	24	Government	No	No	Mid	Mobile Data	4G	0	No	Mobile	1	Yes	Yes	0	Sometimes	No	No	No	Yes	OM	Biology	S	15	43	42	33	Yes	Under-7	M	CC	Moderate	Yes	Yes	83	24.6507	53.0808	329.394	43.0286	593.518
Male	18	Non Government	Yes	No	Mid	Mobile Data	3G	2024-01-03	Yes	Computer	0.75	No	Yes	0	Sometimes	No	No	No	No	KW	Biology	S	92	65	62	53	Yes	Under-7	H	DD	Moderate	Yes	Yes	65	18.0628	38.8459	832.265	36.3938	607.277
Male	21	Non Government	No	Yes	Poor	Mobile Data	4G	2024-01-03	No	Mobile	0.75	Yes	No	0	Always	No	No	Yes	No	UAE	Biology	S	83	75	62	53	No	Under-7	H	DC	Low	Yes	Yes	78	27.1319	40.7648	656.737	37.8277	908.677
Female	24	Non Government	No	Yes	Poor	Mobile Data	4G	2024-01-03	No	Mobile	0.75	No	Yes	0	Never	No	No	No	Yes	JO	Computer Science	S	27	15	42	53	No	Above-7	L	DD	Moderate	Yes	Yes	73	18.4237	62.1253	854.334	33.7334	406.721
Male	21	Non Government	Yes	Yes	Mid	Mobile Data	4G	2024-01-03	No	Mobile	0.5	No	No	0	Never	No	No	No	Yes	LEB	Physics	S	45	95	12	13	No	Under-7	M	DD	Moderate	Yes	Yes	60	26.9488	31.7658	564.163	35.2585	784.667
Male	19	Non Government	Yes	Yes	Mid	Wifi	4G	2024-03-06	No	Computer	0.75	No	No	0	Sometimes	No	Yes	Yes	Yes	KW	Environmental Science	S	15	90	52	83	Yes	Under-7	H	DC	Low	Yes	Yes	70	20.4298	69.6837	439.294	55.9203	478.787
Female	22	Non Government	No	Yes	Poor	Mobile Data	3G	2024-01-03	No	Mobile	0.75	No	No	2	Always	No	No	Yes	Yes	LEB	Materials Science	S	45	58	52	43	Yes	Under-7	H	DD	High	Yes	Yes	78	29.4969	35.2141	929.661	49.2519	893.929
Female	22	Non Government	No	No	Mid	Wifi	4G	2024-01-03	No	Mobile	0.5	No	No	0	Always	No	No	Yes	Yes	JO	Environmental Science	S	25	5	12	33	Yes	Under-7	M	DD	Moderate	Yes	Yes	63	22.4153	61.8427	132.627	72.3936	867.144
Male	22	Non Government	No	Yes	Mid	Wifi	4G	2024-01-03	Yes	Mobile	0.75	No	No	12	Always	No	Yes	Yes	No	SA	Mathematics	S	22	51	42	40	Yes	Under-7	M	DD	Moderate	Yes	Yes	73	21.9232	45.791	870.517	82.2145	699.953
Male	24	Government	No	No	Poor	Mobile Data	3G	0	No	Mobile	0.5	No	No	0	Sometimes	No	Yes	No	Yes	SA	Geology	S	29	10	12	24	No	Above-7	L	BB	Low	Yes	Yes	63	19.7867	49.6886	307.736	77.0864	527.612
Female	21	Non Government	No	No	Mid	Wifi	4G	2024-01-03	No	Mobile	0.75	Yes	Yes	0	Always	Yes	No	No	No	SA	Neuroscience	S	72	51	42	24	Yes	Above-7	H	DD	Low	Yes	Yes	63	21.6673	65.226	863.863	61.8382	780.697
Male	24	Government	No	Yes	Mid	Wifi	4G	2024-01-03	No	Mobile	0.75	No	Yes	0	Always	No	No	No	Yes	JO	Computer Science	S	67	31	42	14	Yes	Under-7	M	DD	Moderate	Yes	Yes	68	28.5198	46.5164	225.277	36.1465	493.755
Male	20	Non Government	Yes	Yes	Poor	Wifi	3G	2024-03-06	No	Mobile	0.75	Yes	Yes	0	Always	No	Yes	Yes	No	SA	Astronomy	S	17	21	42	14	Yes	Under-7	M	DC	Low	Yes	Yes	71	29.956	51.4998	622.197	72.586	514.014
Male	20	Government	No	Yes	Mid	Wifi	4G	2024-01-03	No	Mobile	1	No	Yes	2	Sometimes	Yes	Yes	No	Yes	UAE	Astronomy	S	27	41	49	14	No	Under-7	M	DC	Moderate	Yes	Yes	74	22.4197	31.972	899.297	51.7697	776.014
Male	18	Non Government	Yes	Yes	Poor	Wifi	4G	2024-01-03	Yes	Computer	0.5	No	Yes	0	Sometimes	No	Yes	No	Yes	LEB	Chemistry	S	70	81	39	84	No	Under-7	M	DD	High	Yes	Yes	80	23.3833	30.0939	526.186	35.139	994.737
Male	20	Non Government	Yes	Yes	Mid	Wifi	4G	2024-03-06	No	Computer	0.5	No	No	2	Never	No	Yes	No	Yes	JO	Statistics	S	27	90	82	14	Yes	Under-7	H	BA	Moderate	Yes	Yes	74	26.6649	39.792	771.91	80.548	934.637
Male	24	Non Government	Yes	Yes	Mid	Mobile Data	3G	2024-01-03	No	Mobile	1	No	Yes	0	Always	No	No	Yes	Yes	SA	Geology	S	17	61	42	14	No	Under-7	M	BA	Moderate	Yes	Yes	92	28.6343	57.2233	824.204	50.293	755.864
Male	18	Non Government	Yes	Yes	Mid	Wifi	4G	2024-03-06	Yes	Computer	0.5	Yes	No	0	3	No	Yes	Yes	Yes	UAE	Mathematics	S	87	81	42	19	Yes	Under-7	H	BA	Moderate	Yes	Yes	68	25.1165	34.8506	762.845	43.0949	723.122
Female	18	Non Government	No	Yes	Mid	Wifi	4G	2024-01-03	No	Mobile	0.5	No	No	0	Never	No	Yes	No	Yes	KW	Engineering	S	7	61	22	14	No	Above-7	L	AA	Moderate	Yes	Yes	58	22.6983	34.5505	932.797	82.2871	999.031
Male	19	Non Government	Yes	Yes	Mid	Mobile Data	3G	2024-03-06	Yes	Mobile	1	Yes	Yes	8	Always	Yes	Yes	Yes	Yes	KW	Statistics	S	17	50	2	4	No	Above-7	L	BA	Low	Yes	Yes	88	22.9515	46.4384	502.151	84.128	728.438
Female	24	Non Government	No	Yes	Mid	Mobile Data	4G	2024-03-06	No	Mobile	1	Yes	No	0	Always	Yes	Yes	Yes	Yes	SA	Neuroscience	S	5	21	42	14	No	Above-7	L	AA	Moderate	Yes	Yes	61	26.3474	55.9135	255.813	50.3383	652.07
Female	23	Government	No	No	Mid	Mobile Data	3G	0	No	Mobile	1	No	No	0	Always	Yes	Yes	Yes	No	UAE	Statistics	S	27	41	32	61	Yes	Above-7	M	AA	Low	Yes	Yes	78	18.0386	58.4829	143.03	51.2881	945.733
Male	23	Non Government	Yes	Yes	Mid	Wifi	3G	2024-03-06	Yes	Computer	0.5	No	Yes	0	Always	No	Yes	No	Yes	JO	Environmental Science	S	87	88	40	10	Yes	Under-7	M	AA	Low	Yes	Yes	54	25.4351	37.138	321.814	64.7777	540.511
Female	24	Non Government	No	Yes	Mid	Mobile Data	4G	2024-01-03	No	Mobile	1	No	Yes	0	Never	No	Yes	No	No	OM	Statistics	S	96	61	42	94	Yes	Under-7	H	AA	Moderate	Yes	Yes	79	22.2659	33.1835	228.878	74.0065	458.516
Female	18	Non Government	No	Yes	Mid	Wifi	4G	2024-01-03	No	Mobile	0.75	No	Yes	0	Always	No	No	Yes	Yes	OM	Environmental Science	S	57	51	46	34	Yes	Under-7	M	BA	Low	Yes	Yes	106	27.5304	67.6159	602.154	33.789	780.454
Female	24	Non Government	No	Yes	Mid	Mobile Data	4G	2024-01-03	No	Mobile	0.5	Yes	Yes	2	Sometimes	No	No	Yes	Yes	LEB	Materials Science	S	77	69	41	13	Yes	Under-7	M	AA	Moderate	Yes	Yes	67	19.1159	40.4267	266.451	65.6006	457.51
Female	18	Government	No	No	Mid	Mobile Data	4G	2024-01-03	No	Mobile	0.5	Yes	Yes	0	Sometimes	Yes	Yes	Yes	No	UAE	Neuroscience	S	80	51	40	24	No	Under-7	M	Fail	Low	No	No	64	25.0584	64.1339	135.04	87.1692	623.889
Female	22	Government	No	No	Mid	Mobile Data	3G	2024-01-03	No	Mobile	1	No	Yes	0	Always	Yes	No	Yes	Yes	KW	Computer Science	S	62	61	82	40	Yes	Under-7	M	BA	Low	Yes	Yes	72	23.7717	64.5397	132.391	45.7256	654.146
Female	20	Government	No	Yes	Rich	Mobile Data	4G	2024-01-03	Yes	Mobile	0.5	No	No	12	Always	Yes	No	No	No	JO	Neuroscience	S	72	83	12	90	Yes	Under-7	H	AA	Low	Yes	Yes	78	25.7079	60.9009	848.413	84.5296	728.523
Female	22	Non Government	No	Yes	Poor	Mobile Data	3G	2024-01-03	No	Mobile	0.75	Yes	Yes	0	Always	No	No	Yes	Yes	UAE	English	S	87	81	22	70	Yes	Under-7	H	BB	Low	Yes	Yes	70	18.7782	36.7533	632.305	87.0101	994.996
Female	21	Non Government	Yes	No	Mid	Wifi	4G	2024-01-03	Yes	Computer	1	Yes	Yes	0	Always	No	Yes	Yes	No	LEB	Environmental Science	S	72	90	12	30	No	Under-7	M	BA	Moderate	Yes	Yes	68	24.9598	62.8721	422.277	46.1492	532.589
Female	23	Non Government	No	Yes	Mid	Wifi	4G	2024-03-06	No	Mobile	0.75	Yes	Yes	12	Sometimes	No	Yes	6	Yes	KW	Astronomy	S	2	11	62	30	No	Under-7	L	BB	Moderate	Yes	Yes	74	24.7378	60.77	904.805	75.2521	625.454
[truncated: 4,068 more rows]
